# Supplementary material
Source: publisher figshare collection journal article supplement (https://acs.figshare.com/ndownloader/files/9711805)
Supplement: Supplementary file 1 [file 9711805]

data_P21m_a

_audit_update_record
;
2017-01-11 # Formatted by publCIF

;
_publcif_datablock.id '{4baced12-9f56-416e-b684-46586ecfb5f0}'

_publ_section_exptl_refinement
;
(type here to add)
;

_publ_section_exptl_prep
;
(type here to add)
;

_publ_manuscript_text
;
(type here to add)
;
#============================================================================== 
# PH-12
#==============================================================================
_audit_creation_date        '2017-01-11'
_audit_creation_method            SHELXL-2014 


#   SUBMISSION DETAILS

_publ_contact_author_name            ' '
_publ_contact_author_address            
;
School of Pharmacy, Tokyo University of Pharmacy and Life Sciences, 
1432-1 Horinouchi, Hachioji, Tokyo 192-0392, Japan 
;
_publ_contact_author_email           ' '
_publ_contact_author_fax             ?
_publ_contact_author_phone           ?

_publ_requested_journal              ' '
_publ_requested_category             ?   
_publ_contact_letter
?
_publ_section_title
;
Title PH-12
;
_publ_section_abstract
;
(type here to add)
;
_publ_section_comment
;
 
; 

loop_
	_publ_author_name
        _publ_author_address
?               
;
School of Pharmacy, Tokyo University of Pharmacy and Life Sciences, 
1432-1 Horinouchi, Hachioji, Tokyo 192-0392, Japan
;

#==============================================================================

#  TEXT

#==============================================================================

_publ_section_acknowledgements
;
?
;
_publ_section_references

;
Bruker, A. X. S. "<i>APEX2</i>, Software Suite for Crystallographic Programs.
version 2014/11, " Bruker AXS Inc., Madison, WI, USA (2014).

Bruker, A. X. S. "<i>SAINT</i>, program for integration of the intensity of
reflections and scaling, V8.34a "Bruker AXS Inc., Madison,WI, USA
(1997--2013).

G. M. Sheldrick, "<i>SADABS</i>, Program for the empirical absorption
correction of area detector data, version 2014/2."University of G\"ottingen,
Germany (2014).

G. M. Sheldrick, "<i>SHELXL2014</i>." Program for Refinement of Crystal
Structures, University of G\"ottingen and Bruker AXS, Germany (2014).

G. M. Sheldrick, "<i>SHELXTL2013</i>." Program for crystal structure solution,
University of G\"ottingen and Bruker AXS, Germany (2013).

A.L.Spek (2003). "<i>PLATON</i>, A Multipurpose Crystallographic Tool." Utrecht
University, Utrecht, The Netherlands. or A. L. Spek, J. Appl. Cryst., 36, 7-13
(2003).

H. D. FLACK, Acta Cryst., A39, 876-881 (1983).
;

#==============================================================================

#  CHEMICAL DATA

#==============================================================================

_chemical_name_systematic         ?
_chemical_name_common             ?
_chemical_melting_point           ?
_chemical_formula_moiety          'C15 H26 O2'
_chemical_formula_sum             'C15 H26 O2' 
_chemical_formula_weight          238.36
_chemical_formula_structural         ?
_chemical_formula_analytical         ?
_chemical_absolute_configuration     unk

loop_
 _atom_type_symbol
 _atom_type_description
 _atom_type_scat_dispersion_real
 _atom_type_scat_dispersion_imag
 _atom_type_scat_source
 'C'  'C'   0.0033   0.0016
 'International Tables Vol C Tables 4.2.6.8 and 6.1.1.4'
 'H'  'H'   0.0000   0.0000
 'International Tables Vol C Tables 4.2.6.8 and 6.1.1.4'
 'O'  'O'   0.0106   0.0060
 'International Tables Vol C Tables 4.2.6.8 and 6.1.1.4'

#==============================================================================

#   CRYSTAL DATA

#==============================================================================

 
_space_group_crystal_system       monoclinic
_space_group_IT_number            4
_space_group_name_H-M_alt         'P 21'
_space_group_name_Hall            'P 2yb'
 
_shelx_space_group_comment
;
The symmetry employed for this shelxl refinement is uniquely defined
by the following loop, which should always be used as a source of
symmetry information in preference to the above space-group names.
They are only intended as comments.
;
 
loop_
 _space_group_symop_operation_xyz
 'x, y, z'
 '-x, y+1/2, -z'
 
_cell_length_a                    7.7181(4)
_cell_length_b                    7.1084(4)
_cell_length_c                    26.1890(15)
_cell_angle_alpha                 90
_cell_angle_beta                  98.0830(10)
_cell_angle_gamma                 90
_cell_volume                      1422.54(14)
_cell_formula_units_Z             4
_cell_measurement_temperature     90
_cell_measurement_reflns_used      4842
_cell_measurement_theta_min        2.67
_cell_measurement_theta_max       27.51
 
_exptl_crystal_description          'block'
 
_exptl_crystal_colour               'colourless'
 
_exptl_crystal_density_meas       ?
_exptl_crystal_density_method     ?
_exptl_crystal_density_diffrn     1.113          
_exptl_crystal_F_000              528
_exptl_transmission_factor_min    ?
_exptl_transmission_factor_max    ?
_exptl_crystal_size_max           0.184
_exptl_crystal_size_mid           0.043
_exptl_crystal_size_min           0.033
_exptl_absorpt_coefficient_mu     0.071
_shelx_estimated_absorpt_T_min    0.987
_shelx_estimated_absorpt_T_max    0.998
_exptl_absorpt_correction_type      numerical
 
_exptl_absorpt_correction_T_min  0.956 
_exptl_absorpt_correction_T_max  0.998 
_exptl_absorpt_process_details      
;
Crystal Faces plugin in Bruker APEX2 software
;
 
#==============================================================================

#   EXPERIMENTAL DATA

#==============================================================================

_diffrn_ambient_temperature       90
_diffrn_radiation_wavelength      0.71073
_diffrn_radiation_type            MoK\a
_diffrn_source                      'rotating anode' 
_diffrn_source_type                 'Bruker TXS fine-focus rotating anode'
_diffrn_radiation_monochromator     'Bruker Helios multilayer confocal mirror' 
_diffrn_measurement_device_type     'Bruker SMART APEX II CCD' 
_diffrn_measurement_method          'phi and omega scans' 
_diffrn_detector_area_resol_mean    8.333
_diffrn_reflns_number             14070
_diffrn_reflns_av_unetI/netI      0.0315
_diffrn_reflns_av_R_equivalents   0.0259
_diffrn_reflns_limit_h_min        -9
_diffrn_reflns_limit_h_max        9
_diffrn_reflns_limit_k_min        -8
_diffrn_reflns_limit_k_max        8
_diffrn_reflns_limit_l_min        -31
_diffrn_reflns_limit_l_max        31
_diffrn_reflns_theta_min          1.571
_diffrn_reflns_theta_max          25.028
_diffrn_reflns_theta_full         25.000
_diffrn_measured_fraction_theta_max   0.998
_diffrn_measured_fraction_theta_full  0.998
_diffrn_reflns_Laue_measured_fraction_max    0.998
_diffrn_reflns_Laue_measured_fraction_full   0.998
_diffrn_reflns_point_group_measured_fraction_max   0.993
_diffrn_reflns_point_group_measured_fraction_full  0.993
_reflns_number_total              5008
_reflns_number_gt                 4423
_reflns_threshold_expression      'I > 2\s(I)'
_reflns_Friedel_coverage          0.829
_reflns_Friedel_fraction_max      0.988
_reflns_Friedel_fraction_full     0.988
 
_reflns_special_details
;
 Reflections were merged by SHELXL according to the crystal
 class for the calculation of statistics and refinement.
 
 _reflns_Friedel_fraction is defined as the number of unique
 Friedel pairs measured divided by the number that would be
 possible theoretically, ignoring centric projections and
 systematic absences.
;
 
_computing_data_collection  'APEX2 V2014.11-0 (Bruker AXS Inc.,2014)'
_computing_cell_refinement   'APEX2 V2014.11-0 (Bruker AXS Inc.,2014)'
_computing_data_reduction         'SAINT V8.34a (Bruker AXS Inc., 2013)'
_computing_structure_solution  'SHELXTL XT Intrinsic Phasing (Sheldrick, 2013)'
_computing_structure_refinement     'SHELXL-2014/7 (Sheldrick, 2014)'
_computing_molecular_graphics       'Platon (A.L.Spek, 2003)'
_computing_publication_material     
;
pubCIF (Westrip, 2010) and enCIFer (Allen et al. 2004)
;
 
_refine_special_details           ?
_refine_ls_structure_factor_coef  Fsqd
_refine_ls_matrix_type            full
_refine_ls_weighting_scheme       calc
_refine_ls_weighting_details
'w=1/[\s^2^(Fo^2^)+(0.0468P)^2^+0.1271P] where P=(Fo^2^+2Fc^2^)/3'
_atom_sites_solution_primary      ?
_atom_sites_solution_secondary    ?
_atom_sites_solution_hydrogens    mixed
_refine_ls_hydrogen_treatment     mixed
_refine_ls_extinction_method      none
_refine_ls_extinction_coef        .
_refine_ls_abs_structure_details
;
 Flack x determined using 1791 quotients [(I+)-(I-)]/[(I+)+(I-)]
 (Parsons, Flack and Wagner, Acta Cryst. B69 (2013) 249-259).
;
_refine_ls_abs_structure_Flack    -0.2(4)
_refine_ls_number_reflns          5008
_refine_ls_number_parameters      327
_refine_ls_number_restraints      217
_refine_ls_R_factor_all           0.0421
_refine_ls_R_factor_gt            0.0348
_refine_ls_wR_factor_ref          0.0870
_refine_ls_wR_factor_gt           0.0829
_refine_ls_goodness_of_fit_ref    1.036
_refine_ls_restrained_S_all       1.083
_refine_ls_shift/su_max           0.001
_refine_ls_shift/su_mean          0.000
 
loop_
 _atom_site_label
 _atom_site_type_symbol
 _atom_site_fract_x
 _atom_site_fract_y
 _atom_site_fract_z
 _atom_site_U_iso_or_equiv
 _atom_site_adp_type
 _atom_site_occupancy
 _atom_site_site_symmetry_order  
 _atom_site_calc_flag
 _atom_site_refinement_flags_posn
 _atom_site_refinement_flags_adp
 _atom_site_refinement_flags_occupancy
 _atom_site_disorder_assembly
 _atom_site_disorder_group
C1 C 0.9864(3) 0.3099(3) 0.40173(8) 0.0179(4) Uani 1 1 d . U . . .
C2 C 0.8236(3) 0.1858(3) 0.39471(8) 0.0171(4) Uani 1 1 d . U . . .
H2 H 0.8091 0.1088 0.3624 0.021 Uiso 1 1 calc R U . . .
C3 C 0.7577(3) 0.0921(3) 0.43966(8) 0.0177(4) Uani 1 1 d . U . . .
H3 H 0.8222 0.1307 0.4739 0.021 Uiso 1 1 calc R U . . .
C4 C 0.6540(3) 0.2502(3) 0.41119(8) 0.0179(4) Uani 1 1 d . U . . .
H4A H 0.5440 0.2173 0.3888 0.021 Uiso 1 1 calc R U . . .
H4B H 0.6530 0.3735 0.4288 0.021 Uiso 1 1 calc R U . . .
C5 C 0.6929(3) -0.1098(3) 0.43845(8) 0.0188(4) Uani 1 1 d . U . . .
C6 C 0.5602(3) -0.1313(3) 0.47601(9) 0.0231(5) Uani 1 1 d . U . . .
H6A H 0.5294 -0.2643 0.4786 0.035 Uiso 1 1 calc R U . . .
H6B H 0.4548 -0.0587 0.4635 0.035 Uiso 1 1 calc R U . . .
H6C H 0.6112 -0.0846 0.5100 0.035 Uiso 1 1 calc R U . . .
C7 C 0.6136(3) -0.1791(3) 0.38527(9) 0.0210(5) Uani 1 1 d . U . . .
H7A H 0.7015 -0.1718 0.3617 0.032 Uiso 1 1 calc R U . . .
H7B H 0.5129 -0.1003 0.3721 0.032 Uiso 1 1 calc R U . . .
H7C H 0.5752 -0.3098 0.3877 0.032 Uiso 1 1 calc R U . . .
C8 C 1.1489(3) 0.1857(3) 0.40713(9) 0.0220(5) Uani 1 1 d . U . . .
H8A H 1.2538 0.2649 0.4127 0.033 Uiso 1 1 calc R U . . .
H8B H 1.1495 0.1118 0.3756 0.033 Uiso 1 1 calc R U . . .
H8C H 1.1480 0.1007 0.4365 0.033 Uiso 1 1 calc R U . . .
C9 C 0.9780(3) 0.4528(3) 0.35708(8) 0.0190(4) Uani 1 1 d . U . . .
H9 H 0.8726 0.5328 0.3591 0.023 Uiso 1 1 calc R U . . .
C10 C 1.1346(3) 0.5874(3) 0.36100(9) 0.0222(4) Uani 1 1 d . U . . .
H10A H 1.1598 0.6376 0.3965 0.027 Uiso 1 1 calc R U . . .
H10B H 1.2394 0.5185 0.3533 0.027 Uiso 1 1 calc R U . . .
C11 C 1.0947(3) 0.7493(4) 0.32304(9) 0.0236(4) Uani 1 1 d . U . . .
H11A H 1.0133 0.8377 0.3367 0.028 Uiso 1 1 calc R U . . .
H11B H 1.2044 0.8182 0.3203 0.028 Uiso 1 1 calc R U . . .
C12 C 1.0147(3) 0.6855(4) 0.26998(9) 0.0230(4) Uani 1 1 d . U . . .
C13 C 0.9562(3) 0.5106(4) 0.26163(9) 0.0226(4) Uani 1 1 d . U . . .
H13 H 0.9138 0.4755 0.2271 0.027 Uiso 1 1 calc R U . . .
C14 C 0.9524(3) 0.3640(4) 0.30309(8) 0.0215(4) Uani 1 1 d . U . . .
H14A H 1.0462 0.2707 0.3008 0.026 Uiso 1 1 calc R U . . .
H14B H 0.8389 0.2971 0.2975 0.026 Uiso 1 1 calc R U . . .
C15 C 1.0020(3) 0.8328(4) 0.22850(9) 0.0301(6) Uani 1 1 d . U . . .
H15A H 0.9534 0.7765 0.1954 0.045 Uiso 1 1 calc R U . . .
H15B H 1.1188 0.8830 0.2261 0.045 Uiso 1 1 calc R U . . .
H15C H 0.9255 0.9349 0.2369 0.045 Uiso 1 1 calc R U . . .
C1B C 0.5104(3) 0.7006(3) 0.09456(8) 0.0184(4) Uani 1 1 d . U . . .
C2B C 0.6723(3) 0.5757(3) 0.10516(9) 0.0186(4) Uani 1 1 d . U . . .
H2B H 0.6793 0.5004 0.1376 0.022 Uiso 1 1 calc R U . . .
C3B C 0.8474(3) 0.6374(3) 0.09169(8) 0.0200(4) Uani 1 1 d . U . . .
H3B1 H 0.9533 0.6043 0.1159 0.024 Uiso 1 1 calc R U . . .
H3B2 H 0.8533 0.7596 0.0739 0.024 Uiso 1 1 calc R U . . .
C4B C 0.7470(3) 0.4790(3) 0.06226(9) 0.0188(4) Uani 1 1 d . U . . .
H4B1 H 0.6895 0.5164 0.0271 0.023 Uiso 1 1 calc R U . . .
C5B C 0.8087(3) 0.2760(3) 0.06550(8) 0.0194(4) Uani 1 1 d . U . . .
C6B C 0.9487(3) 0.2484(4) 0.03034(9) 0.0247(5) Uani 1 1 d . U . . .
H6B1 H 0.9770 0.1144 0.0287 0.037 Uiso 1 1 calc R U . . .
H6B2 H 1.0541 0.3188 0.0441 0.037 Uiso 1 1 calc R U . . .
H6B3 H 0.9046 0.2944 -0.0043 0.037 Uiso 1 1 calc R U . . .
C7B C 0.8772(3) 0.2087(3) 0.11985(9) 0.0230(5) Uani 1 1 d . U . . .
H7B1 H 0.7840 0.2185 0.1416 0.034 Uiso 1 1 calc R U . . .
H7B2 H 0.9766 0.2869 0.1343 0.034 Uiso 1 1 calc R U . . .
H7B3 H 0.9149 0.0774 0.1186 0.034 Uiso 1 1 calc R U . . .
C8B C 0.3477(3) 0.5764(3) 0.08647(9) 0.0230(5) Uani 1 1 d . U . . .
H8B1 H 0.2434 0.6555 0.0784 0.035 Uiso 1 1 calc R U . . .
H8B2 H 0.3396 0.5045 0.1180 0.035 Uiso 1 1 calc R U . . .
H8B3 H 0.3554 0.4895 0.0578 0.035 Uiso 1 1 calc R U . . .
C9B C 0.5087(3) 0.8457(3) 0.13840(8) 0.0198(4) Uani 1 1 d . U . . .
H9B H 0.6170 0.9233 0.1389 0.024 Uiso 1 1 calc R U . . .
C10B C 0.3543(3) 0.9825(3) 0.13014(9) 0.0223(4) Uani 1 1 d . U . . .
H10C H 0.3410 1.0325 0.0945 0.027 Uiso 1 1 calc R U . . .
H10D H 0.2451 0.9156 0.1348 0.027 Uiso 1 1 calc R U . . .
C11B C 0.3848(3) 1.1445(4) 0.16857(9) 0.0242(4) Uani 1 1 d . U . . .
H11C H 0.4717 1.2319 0.1572 0.029 Uiso 1 1 calc R U . . .
H11D H 0.2739 1.2147 0.1684 0.029 Uiso 1 1 calc R U . . .
C12B C 0.4488(3) 1.0816(4) 0.22274(9) 0.0251(4) Uani 1 1 d . U . . .
C13B C 0.5050(3) 0.9069(4) 0.23286(9) 0.0256(4) Uani 1 1 d . U . . .
H13B H 0.5402 0.8735 0.2679 0.031 Uiso 1 1 calc R U . . .
C14B C 0.5166(3) 0.7587(4) 0.19250(9) 0.0237(4) Uani 1 1 d . U . . .
H14C H 0.4188 0.6686 0.1926 0.028 Uiso 1 1 calc R U . . .
H14D H 0.6276 0.6884 0.2010 0.028 Uiso 1 1 calc R U . . .
C15B C 0.4449(4) 1.2287(4) 0.26376(10) 0.0347(6) Uani 1 1 d . U . . .
H15D H 0.4875 1.1742 0.2976 0.052 Uiso 1 1 calc R U . . .
H15E H 0.3246 1.2734 0.2634 0.052 Uiso 1 1 calc R U . . .
H15F H 0.5200 1.3344 0.2570 0.052 Uiso 1 1 calc R U . . .
O1 O 0.9969(2) 0.4107(2) 0.44991(6) 0.0184(4) Uani 1 1 d . U . . .
O2 O 0.8421(2) -0.2311(2) 0.45419(6) 0.0196(4) Uani 1 1 d . U . . .
O1B O 0.5113(2) 0.7984(2) 0.04645(6) 0.0197(4) Uani 1 1 d . U . . .
O2B O 0.6589(2) 0.1576(2) 0.04806(6) 0.0201(4) Uani 1 1 d . U . . .
H2O H 0.893(3) -0.185(4) 0.4839(10) 0.030 Uiso 1 1 d . U . . .
H1O H 0.932(3) 0.506(4) 0.4471(10) 0.030 Uiso 1 1 d . U . . .
H2OB H 0.604(3) 0.209(4) 0.0182(10) 0.030 Uiso 1 1 d . U . . .
H1OB H 0.571(3) 0.901(4) 0.0508(10) 0.030 Uiso 1 1 d . U . . .
 
loop_
 _atom_site_aniso_label
 _atom_site_aniso_U_11
 _atom_site_aniso_U_22
 _atom_site_aniso_U_33
 _atom_site_aniso_U_23
 _atom_site_aniso_U_13
 _atom_site_aniso_U_12
C1 0.0174(8) 0.0174(8) 0.0184(8) -0.0044(7) 0.0011(7) 0.0000(7)
C2 0.0167(8) 0.0157(8) 0.0186(8) -0.0014(7) 0.0012(6) 0.0006(7)
C3 0.0175(8) 0.0159(8) 0.0193(8) 0.0000(7) 0.0013(6) 0.0019(7)
C4 0.0170(8) 0.0158(9) 0.0207(8) 0.0007(8) 0.0019(7) 0.0013(7)
C5 0.0192(9) 0.0157(9) 0.0208(8) 0.0018(8) 0.0004(7) 0.0029(7)
C6 0.0229(11) 0.0182(12) 0.0283(12) 0.0048(10) 0.0036(9) 0.0014(10)
C7 0.0228(11) 0.0164(12) 0.0223(11) 0.0014(9) -0.0025(9) -0.0001(9)
C8 0.0196(11) 0.0219(12) 0.0235(11) -0.0052(10) -0.0006(9) 0.0000(10)
C9 0.0174(8) 0.0199(8) 0.0196(8) -0.0028(7) 0.0024(7) -0.0020(7)
C10 0.0211(8) 0.0232(9) 0.0221(9) -0.0031(8) 0.0027(7) -0.0045(8)
C11 0.0228(9) 0.0250(9) 0.0234(9) -0.0024(8) 0.0045(7) -0.0063(8)
C12 0.0217(8) 0.0268(9) 0.0211(8) -0.0017(8) 0.0054(7) -0.0038(8)
C13 0.0219(9) 0.0268(9) 0.0193(9) -0.0026(8) 0.0033(7) -0.0032(8)
C14 0.0208(8) 0.0239(9) 0.0199(8) -0.0029(8) 0.0030(7) -0.0039(8)
C15 0.0328(13) 0.0331(14) 0.0246(12) 0.0012(11) 0.0046(10) -0.0076(11)
C1B 0.0173(8) 0.0185(9) 0.0191(8) 0.0040(7) 0.0010(7) -0.0013(7)
C2B 0.0171(8) 0.0176(8) 0.0205(8) 0.0001(7) 0.0004(6) -0.0024(7)
C3B 0.0177(8) 0.0179(9) 0.0239(9) -0.0029(8) 0.0012(7) -0.0019(7)
C4B 0.0167(8) 0.0175(9) 0.0215(8) -0.0011(7) 0.0007(7) -0.0027(7)
C5B 0.0176(9) 0.0171(9) 0.0224(9) -0.0011(8) -0.0011(7) -0.0032(7)
C6B 0.0235(12) 0.0210(12) 0.0294(12) -0.0050(10) 0.0035(10) -0.0030(10)
C7B 0.0210(11) 0.0204(12) 0.0258(12) -0.0008(10) -0.0029(9) 0.0006(9)
C8B 0.0204(11) 0.0209(12) 0.0263(12) 0.0058(10) -0.0019(9) -0.0005(10)
C9B 0.0172(8) 0.0220(8) 0.0201(8) 0.0042(7) 0.0021(7) 0.0006(7)
C10B 0.0188(8) 0.0253(9) 0.0228(9) 0.0043(8) 0.0027(7) 0.0029(8)
C11B 0.0209(9) 0.0274(10) 0.0245(9) 0.0025(8) 0.0041(7) 0.0050(8)
C12B 0.0216(8) 0.0313(9) 0.0230(9) 0.0011(8) 0.0056(7) 0.0038(8)
C13B 0.0241(9) 0.0319(10) 0.0211(9) 0.0035(8) 0.0042(7) 0.0038(8)
C14B 0.0225(8) 0.0272(10) 0.0214(9) 0.0048(8) 0.0032(7) 0.0033(8)
C15B 0.0349(13) 0.0395(15) 0.0296(13) -0.0029(12) 0.0037(10) 0.0091(12)
O1 0.0204(8) 0.0159(9) 0.0180(8) -0.0029(7) -0.0005(6) 0.0034(7)
O2 0.0213(8) 0.0161(9) 0.0196(8) -0.0017(7) -0.0031(6) 0.0051(7)
O1B 0.0232(9) 0.0164(9) 0.0182(8) 0.0027(7) -0.0008(6) -0.0033(7)
O2B 0.0200(8) 0.0164(9) 0.0218(8) 0.0022(7) -0.0045(7) -0.0045(7)
 
_geom_special_details
;
 All esds (except the esd in the dihedral angle between two l.s. planes)
 are estimated using the full covariance matrix.  The cell esds are taken
 into account individually in the estimation of esds in distances, angles
 and torsion angles; correlations between esds in cell parameters are only
 used when they are defined by crystal symmetry.  An approximate (isotropic)
 treatment of cell esds is used for estimating esds involving l.s. planes.
;
 
loop_
 _geom_bond_atom_site_label_1
 _geom_bond_atom_site_label_2
 _geom_bond_distance
 _geom_bond_site_symmetry_2
 _geom_bond_publ_flag
C1 O1 1.443(3) . ?
C1 C8 1.524(3) . ?
C1 C2 1.525(3) . ?
C1 C9 1.544(3) . ?
C2 C3 1.502(3) . ?
C2 C4 1.506(3) . ?
C2 H2 1.0000 . ?
C3 C4 1.514(3) . ?
C3 C5 1.519(3) . ?
C3 H3 1.0000 . ?
C4 H4A 0.9900 . ?
C4 H4B 0.9900 . ?
C5 O2 1.451(3) . ?
C5 C7 1.522(3) . ?
C5 C6 1.524(3) . ?
C6 H6A 0.9800 . ?
C6 H6B 0.9800 . ?
C6 H6C 0.9800 . ?
C7 H7A 0.9800 . ?
C7 H7B 0.9800 . ?
C7 H7C 0.9800 . ?
C8 H8A 0.9800 . ?
C8 H8B 0.9800 . ?
C8 H8C 0.9800 . ?
C9 C14 1.536(3) . ?
C9 C10 1.533(3) . ?
C9 H9 1.0000 . ?
C10 C11 1.523(3) . ?
C10 H10A 0.9900 . ?
C10 H10B 0.9900 . ?
C11 C12 1.509(3) . ?
C11 H11A 0.9900 . ?
C11 H11B 0.9900 . ?
C12 C13 1.331(3) . ?
C12 C15 1.502(3) . ?
C13 C14 1.508(3) . ?
C13 H13 0.9500 . ?
C14 H14A 0.9900 . ?
C14 H14B 0.9900 . ?
C15 H15A 0.9800 . ?
C15 H15B 0.9800 . ?
C15 H15C 0.9800 . ?
C1B O1B 1.440(3) . ?
C1B C8B 1.525(3) . ?
C1B C2B 1.526(3) . ?
C1B C9B 1.545(3) . ?
C2B C4B 1.500(3) . ?
C2B C3B 1.509(3) . ?
C2B H2B 1.0000 . ?
C3B C4B 1.515(3) . ?
C3B H3B1 0.9900 . ?
C3B H3B2 0.9900 . ?
C4B C5B 1.518(3) . ?
C4B H4B1 1.0000 . ?
C5B O2B 1.451(3) . ?
C5B C7B 1.524(3) . ?
C5B C6B 1.527(3) . ?
C6B H6B1 0.9800 . ?
C6B H6B2 0.9800 . ?
C6B H6B3 0.9800 . ?
C7B H7B1 0.9800 . ?
C7B H7B2 0.9800 . ?
C7B H7B3 0.9800 . ?
C8B H8B1 0.9800 . ?
C8B H8B2 0.9800 . ?
C8B H8B3 0.9800 . ?
C9B C10B 1.530(3) . ?
C9B C14B 1.539(3) . ?
C9B H9B 1.0000 . ?
C10B C11B 1.526(3) . ?
C10B H10C 0.9900 . ?
C10B H10D 0.9900 . ?
C11B C12B 1.503(3) . ?
C11B H11C 0.9900 . ?
C11B H11D 0.9900 . ?
C12B C13B 1.330(4) . ?
C12B C15B 1.502(4) . ?
C13B C14B 1.504(4) . ?
C13B H13B 0.9500 . ?
C14B H14C 0.9900 . ?
C14B H14D 0.9900 . ?
C15B H15D 0.9800 . ?
C15B H15E 0.9800 . ?
C15B H15F 0.9800 . ?
O1 H1O 0.84(3) . ?
O2 H2O 0.88(3) . ?
O1B H1OB 0.86(3) . ?
O2B H2OB 0.91(3) . ?
 
loop_
 _geom_angle_atom_site_label_1
 _geom_angle_atom_site_label_2
 _geom_angle_atom_site_label_3
 _geom_angle
 _geom_angle_site_symmetry_1
 _geom_angle_site_symmetry_3
 _geom_angle_publ_flag
O1 C1 C8 105.17(17) . . ?
O1 C1 C2 109.70(17) . . ?
C8 C1 C2 109.3(2) . . ?
O1 C1 C9 109.06(18) . . ?
C8 C1 C9 113.42(18) . . ?
C2 C1 C9 110.10(17) . . ?
C3 C2 C4 60.44(14) . . ?
C3 C2 C1 121.73(18) . . ?
C4 C2 C1 121.59(19) . . ?
C3 C2 H2 114.2 . . ?
C4 C2 H2 114.2 . . ?
C1 C2 H2 114.2 . . ?
C2 C3 C4 59.90(14) . . ?
C2 C3 C5 123.31(19) . . ?
C4 C3 C5 122.79(19) . . ?
C2 C3 H3 113.5 . . ?
C4 C3 H3 113.5 . . ?
C5 C3 H3 113.5 . . ?
C2 C4 C3 59.66(14) . . ?
C2 C4 H4A 117.8 . . ?
C3 C4 H4A 117.8 . . ?
C2 C4 H4B 117.8 . . ?
C3 C4 H4B 117.8 . . ?
H4A C4 H4B 114.9 . . ?
O2 C5 C3 108.04(17) . . ?
O2 C5 C7 105.60(18) . . ?
C3 C5 C7 114.44(19) . . ?
O2 C5 C6 109.60(18) . . ?
C3 C5 C6 109.27(19) . . ?
C7 C5 C6 109.76(19) . . ?
C5 C6 H6A 109.5 . . ?
C5 C6 H6B 109.5 . . ?
H6A C6 H6B 109.5 . . ?
C5 C6 H6C 109.5 . . ?
H6A C6 H6C 109.5 . . ?
H6B C6 H6C 109.5 . . ?
C5 C7 H7A 109.5 . . ?
C5 C7 H7B 109.5 . . ?
H7A C7 H7B 109.5 . . ?
C5 C7 H7C 109.5 . . ?
H7A C7 H7C 109.5 . . ?
H7B C7 H7C 109.5 . . ?
C1 C8 H8A 109.5 . . ?
C1 C8 H8B 109.5 . . ?
H8A C8 H8B 109.5 . . ?
C1 C8 H8C 109.5 . . ?
H8A C8 H8C 109.5 . . ?
H8B C8 H8C 109.5 . . ?
C14 C9 C10 108.43(18) . . ?
C14 C9 C1 114.40(19) . . ?
C10 C9 C1 114.29(18) . . ?
C14 C9 H9 106.4 . . ?
C10 C9 H9 106.4 . . ?
C1 C9 H9 106.4 . . ?
C11 C10 C9 110.01(18) . . ?
C11 C10 H10A 109.7 . . ?
C9 C10 H10A 109.7 . . ?
C11 C10 H10B 109.7 . . ?
C9 C10 H10B 109.7 . . ?
H10A C10 H10B 108.2 . . ?
C12 C11 C10 113.2(2) . . ?
C12 C11 H11A 108.9 . . ?
C10 C11 H11A 108.9 . . ?
C12 C11 H11B 108.9 . . ?
C10 C11 H11B 108.9 . . ?
H11A C11 H11B 107.8 . . ?
C13 C12 C15 123.1(2) . . ?
C13 C12 C11 121.2(2) . . ?
C15 C12 C11 115.7(2) . . ?
C12 C13 C14 124.6(2) . . ?
C12 C13 H13 117.7 . . ?
C14 C13 H13 117.7 . . ?
C13 C14 C9 111.5(2) . . ?
C13 C14 H14A 109.3 . . ?
C9 C14 H14A 109.3 . . ?
C13 C14 H14B 109.3 . . ?
C9 C14 H14B 109.3 . . ?
H14A C14 H14B 108.0 . . ?
C12 C15 H15A 109.5 . . ?
C12 C15 H15B 109.5 . . ?
H15A C15 H15B 109.5 . . ?
C12 C15 H15C 109.5 . . ?
H15A C15 H15C 109.5 . . ?
H15B C15 H15C 109.5 . . ?
O1B C1B C8B 105.27(17) . . ?
O1B C1B C2B 109.59(17) . . ?
C8B C1B C2B 109.02(19) . . ?
O1B C1B C9B 109.22(18) . . ?
C8B C1B C9B 113.41(19) . . ?
C2B C1B C9B 110.20(17) . . ?
C4B C2B C3B 60.45(14) . . ?
C4B C2B C1B 121.45(19) . . ?
C3B C2B C1B 121.7(2) . . ?
C4B C2B H2B 114.3 . . ?
C3B C2B H2B 114.3 . . ?
C1B C2B H2B 114.3 . . ?
C2B C3B C4B 59.47(15) . . ?
C2B C3B H3B1 117.8 . . ?
C4B C3B H3B1 117.8 . . ?
C2B C3B H3B2 117.8 . . ?
C4B C3B H3B2 117.8 . . ?
H3B1 C3B H3B2 115.0 . . ?
C2B C4B C3B 60.08(15) . . ?
C2B C4B C5B 123.0(2) . . ?
C3B C4B C5B 122.97(19) . . ?
C2B C4B H4B1 113.6 . . ?
C3B C4B H4B1 113.6 . . ?
C5B C4B H4B1 113.6 . . ?
O2B C5B C4B 107.69(17) . . ?
O2B C5B C7B 105.54(18) . . ?
C4B C5B C7B 114.6(2) . . ?
O2B C5B C6B 109.60(18) . . ?
C4B C5B C6B 109.35(19) . . ?
C7B C5B C6B 109.95(19) . . ?
C5B C6B H6B1 109.5 . . ?
C5B C6B H6B2 109.5 . . ?
H6B1 C6B H6B2 109.5 . . ?
C5B C6B H6B3 109.5 . . ?
H6B1 C6B H6B3 109.5 . . ?
H6B2 C6B H6B3 109.5 . . ?
C5B C7B H7B1 109.5 . . ?
C5B C7B H7B2 109.5 . . ?
H7B1 C7B H7B2 109.5 . . ?
C5B C7B H7B3 109.5 . . ?
H7B1 C7B H7B3 109.5 . . ?
H7B2 C7B H7B3 109.5 . . ?
C1B C8B H8B1 109.5 . . ?
C1B C8B H8B2 109.5 . . ?
H8B1 C8B H8B2 109.5 . . ?
C1B C8B H8B3 109.5 . . ?
H8B1 C8B H8B3 109.5 . . ?
H8B2 C8B H8B3 109.5 . . ?
C10B C9B C14B 108.34(18) . . ?
C10B C9B C1B 114.01(18) . . ?
C14B C9B C1B 114.3(2) . . ?
C10B C9B H9B 106.5 . . ?
C14B C9B H9B 106.5 . . ?
C1B C9B H9B 106.5 . . ?
C11B C10B C9B 109.97(18) . . ?
C11B C10B H10C 109.7 . . ?
C9B C10B H10C 109.7 . . ?
C11B C10B H10D 109.7 . . ?
C9B C10B H10D 109.7 . . ?
H10C C10B H10D 108.2 . . ?
C12B C11B C10B 113.4(2) . . ?
C12B C11B H11C 108.9 . . ?
C10B C11B H11C 108.9 . . ?
C12B C11B H11D 108.9 . . ?
C10B C11B H11D 108.9 . . ?
H11C C11B H11D 107.7 . . ?
C13B C12B C15B 123.1(2) . . ?
C13B C12B C11B 121.4(2) . . ?
C15B C12B C11B 115.5(2) . . ?
C12B C13B C14B 124.3(2) . . ?
C12B C13B H13B 117.8 . . ?
C14B C13B H13B 117.8 . . ?
C13B C14B C9B 111.5(2) . . ?
C13B C14B H14C 109.3 . . ?
C9B C14B H14C 109.3 . . ?
C13B C14B H14D 109.3 . . ?
C9B C14B H14D 109.3 . . ?
H14C C14B H14D 108.0 . . ?
C12B C15B H15D 109.5 . . ?
C12B C15B H15E 109.5 . . ?
H15D C15B H15E 109.5 . . ?
C12B C15B H15F 109.5 . . ?
H15D C15B H15F 109.5 . . ?
H15E C15B H15F 109.5 . . ?
C1 O1 H1O 111.4(18) . . ?
C5 O2 H2O 105.5(18) . . ?
C1B O1B H1OB 111.2(18) . . ?
C5B O2B H2OB 106.9(17) . . ?
 
_refine_diff_density_max    0.182
_refine_diff_density_min   -0.175
_refine_diff_density_rms    0.031

_shelx_res_file
;

    P21m_a.res created by SHELXL-2014/7


TITL P21m_a.res in P2(1)
CELL  0.71073   7.7181   7.1084  26.1890   90.000   98.083   90.000
ZERR    4.000   0.0004   0.0004   0.0015    0.000    0.001    0.000
LATT -1
SYMM -X, 1/2+Y, -Z
SFAC C  H  O
UNIT 60  104  8
REM Old TITL P21m in P2(1)/m
REM SHELXT solution in P2(1)
REM R1 0.106,  Rweak 0.013,  Alpha 0.001,  Orientation as input
REM Flack x= -0.416 ( 0.368 ) from Parsons' quotients
REM Formula found by SHELXT:  C30 O4
L.S. 20
simu 0.001
SHEL 20 0.84
ACTA 50
BOND $H
FMAP 2
PLAN 20
SIZE 0.033 0.043 0.184
TEMP -183.2
WGHT    0.046800    0.127100
FVAR       0.68034
C1    1    0.986352    0.309871    0.401731    11.00000    0.01740    0.01735 =
         0.01842   -0.00442    0.00113   -0.00001
C2    1    0.823591    0.185760    0.394712    11.00000    0.01671    0.01568 =
         0.01862   -0.00141    0.00120    0.00065
AFIX  13
H2    2    0.809116    0.108834    0.362423    11.00000   -1.20000
AFIX   0
C3    1    0.757709    0.092094    0.439663    11.00000    0.01748    0.01594 =
         0.01926    0.00003    0.00129    0.00188
AFIX  13
H3    2    0.822227    0.130725    0.473860    11.00000   -1.20000
AFIX   0
C4    1    0.654048    0.250213    0.411192    11.00000    0.01696    0.01581 =
         0.02066    0.00075    0.00191    0.00129
AFIX  23
H4A   2    0.543965    0.217327    0.388808    11.00000   -1.20000
H4B   2    0.653014    0.373461    0.428750    11.00000   -1.20000
AFIX   0
C5    1    0.692888   -0.109849    0.438445    11.00000    0.01919    0.01573 =
         0.02083    0.00185    0.00042    0.00291
C6    1    0.560237   -0.131267    0.476009    11.00000    0.02287    0.01816 =
         0.02828    0.00476    0.00363    0.00138
AFIX 137
H6A   2    0.529403   -0.264317    0.478625    11.00000   -1.50000
H6B   2    0.454838   -0.058650    0.463516    11.00000   -1.50000
H6C   2    0.611166   -0.084607    0.510042    11.00000   -1.50000
AFIX   0
C7    1    0.613563   -0.179087    0.385266    11.00000    0.02284    0.01638 =
         0.02231    0.00145   -0.00246   -0.00014
AFIX 137
H7A   2    0.701456   -0.171756    0.361730    11.00000   -1.50000
H7B   2    0.512928   -0.100270    0.372128    11.00000   -1.50000
H7C   2    0.575233   -0.309814    0.387700    11.00000   -1.50000
AFIX   0
C8    1    1.148934    0.185723    0.407133    11.00000    0.01956    0.02192 =
         0.02352   -0.00522   -0.00059    0.00002
AFIX 137
H8A   2    1.253830    0.264905    0.412748    11.00000   -1.50000
H8B   2    1.149466    0.111759    0.375577    11.00000   -1.50000
H8C   2    1.148034    0.100687    0.436549    11.00000   -1.50000
AFIX   0
C9    1    0.978023    0.452837    0.357075    11.00000    0.01739    0.01994 =
         0.01958   -0.00284    0.00242   -0.00199
AFIX  13
H9    2    0.872571    0.532765    0.359081    11.00000   -1.20000
AFIX   0
C10   1    1.134622    0.587404    0.360998    11.00000    0.02114    0.02319 =
         0.02213   -0.00310    0.00269   -0.00453
AFIX  23
H10A  2    1.159830    0.637550    0.396534    11.00000   -1.20000
H10B  2    1.239372    0.518531    0.353281    11.00000   -1.20000
AFIX   0
C11   1    1.094681    0.749256    0.323044    11.00000    0.02282    0.02498 =
         0.02337   -0.00238    0.00447   -0.00629
AFIX  23
H11A  2    1.013329    0.837700    0.336680    11.00000   -1.20000
H11B  2    1.204447    0.818152    0.320275    11.00000   -1.20000
AFIX   0
C12   1    1.014666    0.685548    0.269978    11.00000    0.02175    0.02682 =
         0.02115   -0.00168    0.00540   -0.00384
C13   1    0.956161    0.510550    0.261626    11.00000    0.02192    0.02683 =
         0.01928   -0.00264    0.00331   -0.00319
AFIX  43
H13   2    0.913769    0.475504    0.227122    11.00000   -1.20000
AFIX   0
C14   1    0.952445    0.364026    0.303085    11.00000    0.02084    0.02390 =
         0.01992   -0.00293    0.00304   -0.00394
AFIX  23
H14A  2    1.046243    0.270696    0.300788    11.00000   -1.20000
H14B  2    0.838877    0.297085    0.297464    11.00000   -1.20000
AFIX   0
C15   1    1.002007    0.832778    0.228499    11.00000    0.03277    0.03308 =
         0.02457    0.00123    0.00459   -0.00764
AFIX 137
H15A  2    0.953381    0.776537    0.195405    11.00000   -1.50000
H15B  2    1.118840    0.882995    0.226102    11.00000   -1.50000
H15C  2    0.925538    0.934885    0.236922    11.00000   -1.50000
AFIX   0
C1B   1    0.510381    0.700568    0.094564    11.00000    0.01730    0.01848 =
         0.01910    0.00395    0.00100   -0.00128
C2B   1    0.672288    0.575684    0.105163    11.00000    0.01710    0.01761 =
         0.02045    0.00009    0.00036   -0.00236
AFIX  13
H2B   2    0.679315    0.500385    0.137642    11.00000   -1.20000
AFIX   0
C3B   1    0.847423    0.637401    0.091692    11.00000    0.01769    0.01785 =
         0.02385   -0.00287    0.00120   -0.00189
AFIX  23
H3B1  2    0.953304    0.604346    0.115931    11.00000   -1.20000
H3B2  2    0.853273    0.759619    0.073890    11.00000   -1.20000
AFIX   0
C4B   1    0.747034    0.478951    0.062263    11.00000    0.01673    0.01747 =
         0.02152   -0.00107    0.00068   -0.00271
AFIX  13
H4B1  2    0.689501    0.516380    0.027122    11.00000   -1.20000
AFIX   0
C5B   1    0.808731    0.276044    0.065501    11.00000    0.01765    0.01712 =
         0.02243   -0.00109   -0.00110   -0.00323
C6B   1    0.948664    0.248432    0.030342    11.00000    0.02351    0.02104 =
         0.02940   -0.00501    0.00354   -0.00303
AFIX 137
H6B1  2    0.977023    0.114391    0.028664    11.00000   -1.50000
H6B2  2    1.054135    0.318761    0.044138    11.00000   -1.50000
H6B3  2    0.904627    0.294425   -0.004336    11.00000   -1.50000
AFIX   0
C7B   1    0.877153    0.208713    0.119850    11.00000    0.02102    0.02044 =
         0.02576   -0.00080   -0.00287    0.00064
AFIX 137
H7B1  2    0.783975    0.218544    0.141563    11.00000   -1.50000
H7B2  2    0.976591    0.286933    0.134349    11.00000   -1.50000
H7B3  2    0.914892    0.077364    0.118589    11.00000   -1.50000
AFIX   0
C8B   1    0.347670    0.576408    0.086465    11.00000    0.02036    0.02089 =
         0.02632    0.00584   -0.00190   -0.00049
AFIX 137
H8B1  2    0.243390    0.655469    0.078405    11.00000   -1.50000
H8B2  2    0.339628    0.504454    0.117965    11.00000   -1.50000
H8B3  2    0.355440    0.489519    0.057823    11.00000   -1.50000
AFIX   0
C9B   1    0.508748    0.845743    0.138404    11.00000    0.01717    0.02198 =
         0.02013    0.00424    0.00206    0.00059
AFIX  13
H9B   2    0.617048    0.923350    0.138925    11.00000   -1.20000
AFIX   0
C10B  1    0.354298    0.982535    0.130139    11.00000    0.01882    0.02526 =
         0.02275    0.00429    0.00269    0.00290
AFIX  23
H10C  2    0.341050    1.032517    0.094518    11.00000   -1.20000
H10D  2    0.245146    0.915577    0.134802    11.00000   -1.20000
AFIX   0
C11B  1    0.384809    1.144541    0.168568    11.00000    0.02092    0.02735 =
         0.02450    0.00249    0.00410    0.00497
AFIX  23
H11C  2    0.471712    1.231912    0.157214    11.00000   -1.20000
H11D  2    0.273903    1.214679    0.168377    11.00000   -1.20000
AFIX   0
C12B  1    0.448778    1.081622    0.222738    11.00000    0.02161    0.03132 =
         0.02296    0.00109    0.00556    0.00383
C13B  1    0.505014    0.906914    0.232857    11.00000    0.02407    0.03191 =
         0.02113    0.00349    0.00423    0.00377
AFIX  43
H13B  2    0.540196    0.873513    0.267905    11.00000   -1.20000
AFIX   0
C14B  1    0.516605    0.758719    0.192496    11.00000    0.02247    0.02721 =
         0.02136    0.00485    0.00320    0.00333
AFIX  23
H14C  2    0.418846    0.668608    0.192587    11.00000   -1.20000
H14D  2    0.627621    0.688377    0.200998    11.00000   -1.20000
AFIX   0
C15B  1    0.444880    1.228693    0.263763    11.00000    0.03488    0.03949 =
         0.02957   -0.00292    0.00368    0.00905
AFIX 137
H15D  2    0.487501    1.174222    0.297577    11.00000   -1.50000
H15E  2    0.324607    1.273381    0.263428    11.00000   -1.50000
H15F  2    0.519991    1.334407    0.257045    11.00000   -1.50000
AFIX   0
O1    3    0.996943    0.410709    0.449911    11.00000    0.02041    0.01591 =
         0.01802   -0.00287   -0.00045    0.00336
O2    3    0.842052   -0.231122    0.454186    11.00000    0.02130    0.01614 =
         0.01964   -0.00166   -0.00310    0.00515
O1B   3    0.511349    0.798426    0.046450    11.00000    0.02321    0.01645 =
         0.01825    0.00268   -0.00085   -0.00333
O2B   3    0.658944    0.157642    0.048062    11.00000    0.02002    0.01639 =
         0.02181    0.00219   -0.00453   -0.00453
H2O   2    0.892798   -0.185448    0.483877    11.00000   -1.50000
H1O   2    0.932207    0.506286    0.447111    11.00000   -1.50000
H2OB  2    0.603935    0.209214    0.018218    11.00000   -1.50000
H1OB  2    0.571236    0.900560    0.050751    11.00000   -1.50000
HKLF 4

REM  P21m_a.res in P2(1)
REM R1 =  0.0348 for    4423 Fo > 4sig(Fo)  and  0.0421 for all    5008 data
REM    327 parameters refined using    217 restraints

END

WGHT      0.0441      0.1438

REM Highest difference peak  0.182,  deepest hole -0.175,  1-sigma level  0.031
Q1    1   0.9963  0.3832  0.3802  11.00000  0.05    0.17
Q2    1   0.7151 -0.0050  0.4363  11.00000  0.05    0.17
Q3    1   0.4212  1.1196  0.1989  11.00000  0.05    0.16
Q4    1   0.6428 -0.1223  0.4107  11.00000  0.05    0.16
Q5    1   0.7867  0.3782  0.0669  11.00000  0.05    0.15
Q6    1   0.9054  0.2489  0.3972  11.00000  0.05    0.14
Q7    1   0.5144  0.7763  0.1191  11.00000  0.05    0.14
Q8    1   1.0687  0.2545  0.4016  11.00000  0.05    0.13
Q9    1   0.8650  0.2644  0.0468  11.00000  0.05    0.13
Q10   1   0.3605  1.0674  0.1467  11.00000  0.05    0.13
Q11   1   0.4583  1.0034  0.2294  11.00000  0.05    0.13
Q12   1   1.0457  0.7406  0.2952  11.00000  0.05    0.13
Q13   1   0.8534  0.2614  0.0910  11.00000  0.05    0.12
Q14   1   0.6459 -0.1129  0.4558  11.00000  0.05    0.12
Q15   1   0.8514  0.1168  0.4165  11.00000  0.05    0.12
Q16   1   0.4830  0.8285  0.3113  11.00000  0.05    0.11
Q17   1   0.5026  1.4180  0.1397  11.00000  0.05    0.11
Q18   1   0.4468  0.6456  0.0901  11.00000  0.05    0.11
Q19   1   0.5923  0.6359  0.1004  11.00000  0.05    0.11
Q20   1   0.5730  1.1148  0.3307  11.00000  0.05    0.11
;
_shelx_res_checksum    7204

_shelx_hkl_file
;
   1   0   0   -1.90    0.60
   1   0   0   -2.50    0.60
  -1   0   0   -2.90    0.60
  -1   0   0   -1.80    0.60
  -2   0   0 3255.87   55.99
   2   0   0 3196.78   55.99
   2   0   0 3304.87   56.09
  -2   0   0 3274.97   56.19
   3   0   0    2.00    1.10
  -3   0   0    2.70    1.10
   3   0   0    2.10    1.10
  -3   0   0    0.50    1.10
  -4   0   0   98.29    3.60
   4   0   0   95.59    3.60
  -4   0   0   94.79    3.40
   4   0   0   99.09    3.40
   5   0   0    1.20    1.30
  -5   0   0   -0.20    1.20
  -5   0   0   -0.10    1.50
  -6   0   0 1063.89   21.50
   6   0   0 1048.60   21.40
   7   0   0    3.60    1.80
  -7   0   0    5.60    2.00
   8   0   0  100.69    5.80
  -8   0   0  110.19    5.80
  -9   0   0    0.00    2.30
   9   0   0    3.80    2.90
   0   1   0   -4.40    0.80
   0   1   0   -4.10    0.70
   0   1   0   -4.80    0.60
   0   1   0   -4.30    0.70
  -1  -1   0   67.49    2.10
   1  -1   0   65.39    2.00
  -1   1   0   68.09    1.70
   1   1   0   62.99    2.70
  -1   1   0   64.19    2.20
  -1   1   0   67.79    2.60
   1   1   0   65.19    2.10
   2  -1   0  836.62   15.30
  -2  -1   0  829.52   15.30
   2   1   0  851.41   15.50
  -2   1   0  859.31   15.50
   2   1   0  828.72   15.90
  -2   1   0  798.62   15.80
   3  -1   0  119.99    3.60
  -3  -1   0  112.59    3.50
  -3   1   0  122.49    4.10
  -3   1   0  120.69    3.80
   3   1   0  119.89    2.70
   3   1   0  123.19    3.80
  -3   1   0  119.99    2.50
   3   1   0  120.39    4.20
   4  -1   0  679.83   13.20
  -4  -1   0  645.64   13.20
  -4   1   0  681.33   13.70
   4   1   0  645.44   13.40
  -4   1   0  655.53   11.80
   4   1   0  659.93   12.00
  -4   1   0  608.14   13.30
   4   1   0  646.44   13.70
  -5  -1   0   46.60    2.90
   5  -1   0   46.30    3.00
   5   1   0   48.90    3.30
  -5   1   0   48.00    3.30
   5   1   0   44.70    3.20
  -5   1   0   45.40    3.20
   6  -1   0  326.77    8.60
  -6  -1   0  315.37    8.60
  -6   1   0  298.67    8.40
  -6   1   0  324.57    8.90
   6   1   0  312.87    8.80
  -7  -1   0   15.90    2.80
   7  -1   0   16.10    2.70
   7   1   0   11.10    2.60
  -7   1   0   15.40    2.80
   8  -1   0   32.20    3.80
  -8  -1   0   26.50    3.70
  -8   1   0   34.30    4.10
   8   1   0   21.60    3.60
   9  -1   0    1.70    2.60
  -9  -1   0   13.60    3.40
  -9   1   0   11.00    3.10
   9   1   0   16.60    3.30
   0   2   0 2795.42   49.40
   0   2   0 2898.81   49.40
   0   2   0 2862.41   49.60
   0   2   0 2809.62   49.30
   1  -2   0    3.60    1.00
  -1  -2   0    3.40    1.10
  -1   2   0   -0.20    1.20
   1   2   0    4.30    0.90
   1   2   0    2.20    1.50
  -1   2   0    4.00    1.10
  -1   2   0    3.50    1.30
   1   2   0    2.80    1.20
   2  -2   0 1999.80   34.40
   2  -2   0 2046.60   35.50
  -2  -2   0 2026.60   35.50
  -2   2   0 2013.10   35.90
   2   2   0 1987.90   35.90
   2   2   0 2001.30   36.60
  -3  -2   0 1129.89   20.50
   3  -2   0 1103.19   20.30
  -3   2   0 1071.89   20.80
   3   2   0 1043.40   20.80
  -3   2   0 1108.19   21.40
   3   2   0 1109.89   21.60
  -4  -2   0  860.41   16.60
   4  -2   0  841.52   16.50
  -4   2   0  815.02   17.00
   4   2   0  832.22   17.00
   4   2   0  841.02   17.70
  -4   2   0  829.82   17.40
   5  -2   0    4.30    1.50
  -5  -2   0    7.60    1.80
   5   2   0    3.50    2.10
  -5   2   0    7.30    2.00
  -5   2   0    3.60    2.00
   5   2   0    4.50    1.90
  -6  -2   0  109.89    4.90
   6  -2   0  114.99    4.80
  -6   2   0  110.99    5.30
  -6   2   0  117.19    5.40
   6   2   0  105.79    5.30
   6   2   0  122.89    5.40
   7  -2   0    1.20    2.00
  -7  -2   0    5.00    2.30
   7   2   0    1.40    2.30
  -7   2   0    0.60    2.10
  -7   2   0   -0.60    1.90
   8  -2   0    2.90    2.10
  -8  -2   0   -0.40    2.20
   8   2   0    3.90    2.70
  -8   2   0    2.10    2.40
   9  -2   0   27.30    3.90
  -9  -2   0   27.50    4.10
   9   2   0   23.40    4.10
  -9   2   0   30.80    4.30
   0   3   0    0.40    1.20
   0   3   0    0.40    1.10
   0   3   0   -2.50    1.10
   0   3   0   -0.20    1.30
  -1  -3   0  363.46    7.90
   1   3   0  361.86    7.70
  -1   3   0  352.96    8.50
  -1   3   0  365.16    8.00
  -1   3   0  356.76    8.20
   1   3   0  374.06    8.30
   1   3   0  350.36    8.80
  -2  -3   0  128.79    4.00
   2  -3   0  135.39    4.00
   2   3   0  137.89    4.50
  -2   3   0  130.89    4.40
  -2   3   0  130.39    3.50
   2   3   0  120.09    5.00
  -2   3   0  125.49    4.80
   3  -3   0   57.19    2.90
  -3  -3   0   52.29    2.80
   3   3   0   56.09    3.10
  -3   3   0   59.89    3.30
  -3   3   0   51.39    3.60
   3   3   0   60.19    4.00
   4  -3   0   77.99    3.40
  -4  -3   0   69.09    3.40
   4   3   0   73.39    3.90
  -4   3   0   69.09    4.30
   4   3   0   74.69    4.70
  -4   3   0   69.59    3.80
   5  -3   0    2.60    1.70
  -5  -3   0    3.50    1.80
  -5   3   0    3.70    2.10
   5   3   0    3.90    2.40
  -5   3   0    4.20    2.00
   5   3   0    5.00    2.00
  -6  -3   0   -0.30    1.80
   6  -3   0    0.40    1.70
  -6   3   0    4.10    2.10
   6   3   0    1.70    2.40
  -6   3   0    0.00    2.00
   6   3   0    3.40    2.00
   7  -3   0   11.10    2.50
  -7  -3   0    9.90    2.70
   7   3   0   13.10    2.90
  -7   3   0    8.60    2.50
  -7   3   0   10.70    2.90
  -8  -3   0   16.80    3.40
   8  -3   0   10.20    2.90
  -8   3   0   18.00    3.50
   8   3   0   10.90    3.40
   9  -3   0   69.99    5.60
  -9  -3   0   77.39    6.00
   9   3   0   62.09    5.90
  -9   3   0   63.99    5.80
   0   4   0    1.00    1.40
   0   4   0    1.40    1.60
   0   4   0    1.10    1.40
   0   4   0    1.10    1.40
  -1  -4   0   59.19    3.00
  -1   4   0   61.19    3.60
   1   4   0   61.39    2.90
   1   4   0   60.49    3.80
  -1   4   0   60.29    3.20
   1   4   0   57.09    3.30
  -1   4   0   59.59    3.30
   2  -4   0    0.60    1.20
  -2  -4   0    0.50    1.20
   2   4   0    1.00    1.60
   2   4   0    5.10    2.10
   2   4   0    1.60    0.90
  -2   4   0   -0.10    1.60
  -2   4   0    3.20    1.50
  -2   4   0    0.40    1.10
   3  -4   0   41.40    2.70
  -3  -4   0   42.50    2.80
   3   4   0   42.90    4.00
   3   4   0   39.30    3.30
  -3   4   0   33.30    3.20
  -3   4   0   42.70    3.50
  -4  -4   0    1.40    1.50
   4  -4   0    4.50    1.50
   4   4   0    5.00    2.00
  -4   4   0   -0.60    2.00
   4   4   0    2.80    2.40
  -4   4   0    2.90    1.80
  -5  -4   0   15.10    2.30
   5  -4   0   18.90    2.40
  -5   4   0   20.10    3.00
   5   4   0   21.70    3.10
  -5   4   0   17.10    3.10
   5   4   0   12.60    3.10
  -6  -4   0    7.80    2.40
   6  -4   0    2.90    2.00
  -6   4   0    8.40    2.60
   6   4   0    6.90    2.70
   6   4   0    5.70    2.80
  -6   4   0    8.80    2.90
  -7  -4   0   44.80    4.20
   7  -4   0   55.19    4.40
   7   4   0   47.10    4.80
  -7   4   0   60.59    5.40
  -7   4   0   44.70    4.60
  -8  -4   0    5.10    2.90
   8  -4   0    6.00    2.60
  -8  -4   0    4.00    2.70
   8   4   0    3.40    3.10
  -8   4   0    2.90    2.60
   0   5   0   -1.20    1.60
   0   5   0   -0.10    1.80
   0   5   0    0.50    1.60
   0   5   0    0.30    1.60
  -1  -5   0   59.39    3.30
   1   5   0   65.19    3.40
   1   5   0   61.49    3.80
  -1   5   0   58.69    3.70
   1   5   0   60.99    4.30
  -1   5   0   57.99    3.80
  -1   5   0   61.69    4.00
   2  -5   0    4.00    1.60
  -2  -5   0    7.00    1.70
  -2   5   0    5.60    2.20
  -2   5   0    5.20    1.50
  -2   5   0    2.30    2.00
   2   5   0    7.10    2.20
   2   5   0    6.60    2.40
   3  -5   0   38.70    3.00
  -3  -5   0   34.60    2.90
  -3   5   0   34.40    3.60
   3   5   0   30.30    3.30
   3   5   0   34.80    3.80
  -3   5   0   42.50    3.80
   4  -5   0    4.80    1.70
  -4  -5   0    8.20    2.20
   4   5   0    6.20    3.00
   4   5   0    8.40    2.40
  -4   5   0    5.60    2.30
  -4   5   0    7.60    2.70
   5  -5   0   19.20    2.60
  -5  -5   0   19.60    2.70
  -5   5   0   23.40    3.80
   5   5   0   23.50    3.40
   5   5   0   20.40    3.90
  -5   5   0   25.10    3.40
   6  -5   0    5.40    2.20
  -6  -5   0    7.40    2.50
   6   5   0    7.80    3.00
   6   5   0    4.90    3.20
  -6   5   0    9.60    3.40
  -6   5   0   11.00    3.10
  -7  -5   0   31.40    3.80
   7  -5   0   32.30    3.60
   7   5   0   31.50    4.50
  -7   5   0   28.50    4.20
  -7   5   0   30.20    4.40
  -8  -5   0   -2.10    2.70
   8  -5   0    2.90    2.40
   8  -5   0    1.10    2.60
  -8  -5   0    2.40    2.70
  -8   5   0   -3.80    2.40
   8   5   0    1.70    3.00
   0   6   0   29.80    3.20
   0   6   0   27.60    3.00
   0   6   0   25.00    2.90
   0   6   0   25.00    3.20
   1  -6   0    8.10    2.00
  -1  -6   0    8.00    2.00
   1   6   0    6.90    1.90
  -1   6   0    7.90    2.50
   1   6   0    7.10    2.20
  -1   6   0    9.50    2.30
  -1   6   0    9.20    2.30
   1   6   0   10.20    2.90
   2  -6   0   19.00    2.50
  -2  -6   0   27.30    2.80
   2   6   0   18.60    3.50
  -2   6   0   20.90    3.00
  -2   6   0   18.40    3.20
   2   6   0   24.40    3.20
   3  -6   0   11.50    2.20
  -3  -6   0   16.50    2.50
   3   6   0    9.00    3.20
  -3   6   0   12.80    2.90
   3   6   0   11.20    2.80
  -3   6   0   10.00    2.90
  -4  -6   0    2.50    1.90
   4  -6   0   -0.20    1.60
   4   6   0   -0.90    2.60
  -4   6   0    2.50    2.40
  -4   6   0   -0.60    2.40
   4   6   0   -0.90    2.30
  -5  -6   0   48.10    3.90
   5  -6   0   49.00    3.90
   5   6   0   49.50    5.70
  -5   6   0   45.20    4.70
   5   6   0   58.09    5.00
  -5   6   0   55.49    5.60
  -6  -6   0    3.50    2.30
   6  -6   0    8.10    2.40
   6   6   0    2.50    3.00
   6   6   0    3.10    3.60
  -6   6   0    3.30    3.00
  -6   6   0    4.90    2.90
  -7  -6   0    3.60    2.70
   7  -6   0    2.70    2.40
   7   6   0   -0.10    2.90
  -7   6   0    1.50    2.80
   0   7   0    4.80    2.00
   0   7   0    1.70    2.20
   0   7   0    0.10    1.90
  -1  -7   0   27.00    3.00
   1  -7   0   26.50    3.10
   1   7   0   24.70    3.80
   1   7   0   25.90    3.40
  -1   7   0   24.30    3.50
  -1   7   0   23.70    3.30
   2  -7   0   55.29    4.00
  -2  -7   0   52.29    3.70
   2   7   0   53.89    5.20
  -2   7   0   62.69    5.40
  -2   7   0   53.69    4.60
   2   7   0   58.69    4.80
  -3  -7   0   11.10    2.40
   3  -7   0   10.70    2.40
  -3   7   0   13.20    3.10
   3   7   0   15.30    3.30
  -3   7   0   18.40    3.60
   3   7   0   10.80    3.70
  -4  -7   0    2.90    2.10
   4  -7   0    4.80    2.20
  -4   7   0    0.90    2.50
   4   7   0    9.40    3.80
   4   7   0    2.20    2.80
  -4   7   0    5.00    3.00
   5  -7   0   11.70    2.60
  -5  -7   0    9.10    2.70
   5   7   0   10.70    4.40
  -5   7   0   18.80    3.80
  -5   7   0   10.40    3.60
   5   7   0   10.10    3.30
  -6  -7   0    4.40    2.60
   6  -7   0    4.50    2.50
   6   7   0   13.00    3.60
  -6   7   0    2.70    3.10
   0  -8   0    5.70    2.60
   2   8   0    9.10    3.50
  -2   8   0   11.70    3.10
  -3   8   0    1.00    2.80
   3   8   0   -1.20    3.00
  -4   8   0    9.00    3.40
  -5  -8   0   13.20    5.80
  -1  -9   0   -1.50    2.80
  -2  -9   0   24.00    4.40
   2  -9   0   12.00    3.50
   9   0  -1   42.60    4.90
  -9   0   1   35.40    4.40
   8   0  -1    2.80    2.20
  -8   0   1    6.90    2.60
   7   0  -1  750.12   16.80
  -7   0   1  753.02   16.90
  -6   0   1    8.00    2.10
   6   0  -1    6.60    1.60
   6   0  -1    6.40    2.10
  -5   0   1  483.25   10.90
   5   0  -1  484.65   10.20
   5   0  -1  484.55   10.90
  -5   0   1  468.85    9.90
  -4   0   1   44.10    2.20
  -4   0   1   43.80    2.50
   4   0  -1   50.49    2.70
  -3   0   1    0.90    1.00
   3   0  -1   -0.50    1.10
  -3   0   1   -0.60    1.00
  -2   0   1  169.48    3.90
  -2   0   1  163.08    4.00
   2   0  -1  169.38    4.00
   1   0  -1 4158.38   72.29
   1   0  -1 4096.79   71.09
  -1   0   1 4106.09   71.29
  -1   0   1 4159.28   72.49
  -1   0  -1  921.81   16.20
  -1   0  -1  932.11   16.20
   1   0   1  920.51   16.20
   1   0   1  931.01   16.20
   2   0   1  169.58    3.90
  -2   0  -1  164.68    4.00
   2   0   1  159.08    3.90
  -2   0  -1  165.78    3.90
   3   0   1    5.10    1.20
   3   0   1    4.80    1.10
  -3   0  -1    5.10    1.20
  -3   0  -1    4.40    1.20
   4   0   1   73.29    3.00
  -4   0  -1   73.49    3.00
  -4   0  -1   77.49    3.20
   4   0   1   68.09    3.00
   5   0   1  185.48    5.70
  -5   0  -1  183.08    5.60
   5   0   1  184.68    5.20
  -5   0  -1  181.48    5.30
   6   0   1   53.49    3.70
  -6   0  -1   71.09    3.50
  -6   0  -1   65.39    3.90
  -7   0  -1   79.59    4.70
   7   0   1   89.39    4.90
  -8   0  -1   16.40    3.10
   8   0   1   19.00    3.30
   9   0   1    2.60    2.90
  -9   0  -1   -1.80    2.20
   9  -1  -1   -0.90    2.30
  -9  -1   1   -1.60    2.40
   9   1  -1    0.20    2.40
  -9   1   1    6.90    2.90
  -8  -1   1   14.70    2.80
   8  -1  -1    9.30    2.60
  -8   1   1    6.20    2.60
   8   1  -1   12.30    2.90
  -7  -1   1    6.10    2.10
   7  -1  -1    5.30    1.90
   7   1  -1    5.90    2.50
  -7   1   1    6.10    2.30
  -6  -1   1   39.80    3.40
  -6  -1   1   36.50    3.00
   6  -1  -1   40.70    3.40
   6   1  -1   35.90    3.40
  -6   1   1   43.50    3.70
  -5  -1   1   20.00    2.40
   5  -1  -1   17.80    2.10
   5   1  -1   17.60    2.30
  -5   1   1   19.70    2.40
   5   1  -1   17.80    1.50
  -5   1   1   12.90    2.00
   5   1  -1   17.20    2.30
   4  -1  -1   74.29    3.00
  -4  -1   1   74.99    3.20
  -4   1   1   75.19    2.00
  -4   1   1   80.19    3.60
   4   1  -1   76.59    2.30
   4   1  -1   73.19    3.40
  -4   1   1   81.99    3.50
   4   1  -1   75.29    3.50
   3  -1  -1  139.79    3.90
  -3  -1   1  133.19    3.80
  -3   1   1  140.79    4.40
  -3   1   1  137.09    4.20
   3   1  -1  143.79    3.00
  -3   1   1  140.49    2.80
   3   1  -1  144.19    4.60
   3   1  -1  141.69    4.10
  -2  -1   1  230.68    5.00
   2  -1  -1  230.48    5.00
   2   1  -1  226.28    5.70
   2   1  -1  226.48    5.30
  -2   1   1  225.08    5.30
  -2   1   1  231.08    5.60
   2   1  -1  228.28    4.10
  -1  -1   1 5267.27   91.99
   1  -1  -1 5252.47   91.19
  -1   1   1 5195.48   90.09
   1   1  -1 5258.87   89.99
  -1   1   1 5232.08   90.59
   1   1  -1 5321.87   92.19
   1   1  -1 5288.37   92.29
  -1   1   1 5238.88   92.79
   0   1   1   61.49    1.80
   0   1   1   63.39    2.10
   0   1   1   65.79    2.10
   0   1   1   63.29    1.90
   0   1  -1   65.99    2.10
   0   1  -1   63.99    2.00
   0   1  -1   65.99    1.80
  -1  -1  -1  308.67    6.20
   1  -1   1  302.37    5.50
   1  -1   1  311.67    6.10
  -1   1  -1  313.87    6.10
   1   1   1  315.37    6.70
   1   1   1  307.17    6.10
  -1   1  -1  315.87    6.60
  -2  -1  -1  384.26    7.80
   2  -1   1  390.06    7.80
   2   1   1  381.36    7.90
   2   1   1  395.16    8.40
  -2   1  -1  377.76    7.80
  -2   1  -1  387.56    8.30
  -3  -1  -1  706.63   12.60
   3  -1   1  701.33   13.50
   3  -1   1  695.23   12.40
  -3  -1  -1  705.23   13.60
   3   1   1  682.03   13.60
  -3   1  -1  697.63   13.70
   3   1   1  705.43   14.10
  -3   1  -1  707.43   14.00
   4  -1   1  137.99    4.30
  -4  -1  -1  134.79    3.40
  -4  -1  -1  133.69    4.30
  -4   1  -1  136.69    4.80
   4   1   1  120.79    4.30
   4   1   1  132.89    4.80
  -4   1  -1  131.69    4.40
  -5  -1  -1  299.47    7.70
   5  -1   1  296.57    7.50
  -5   1  -1  290.17    7.80
   5   1   1  282.07    7.70
   5   1   1  283.07    7.80
  -5   1  -1  289.17    7.70
   6  -1   1   54.09    3.60
  -6  -1  -1   60.69    3.90
  -6   1  -1   54.79    3.70
   6   1   1   51.59    3.70
   6   1   1   62.49    4.00
  -6   1  -1   63.19    4.00
   7  -1   1   44.00    3.80
  -7  -1  -1   52.89    4.30
  -7   1  -1   40.60    3.80
   7   1   1   58.79    4.40
   8  -1   1   82.29    5.30
  -8  -1  -1   88.79    5.40
   8   1   1   79.69    5.50
  -8   1  -1   82.19    5.40
  -9  -1  -1   36.50    4.40
   9  -1   1   36.40    4.20
   9   1   1   32.10    4.30
  -9   1  -1   31.60    4.00
   9  -2  -1  102.59    6.20
  -9  -2   1   93.19    6.10
  -9   2   1   89.09    6.00
   9   2  -1   92.49    6.50
   8  -2  -1   19.70    3.30
  -8  -2   1   25.30    3.70
  -8   2   1   23.50    3.70
   8   2  -1   26.50    3.90
   7  -2  -1   62.99    4.20
  -7  -2   1   57.19    4.00
  -7  -2   1   60.89    4.20
  -7   2   1   71.09    4.80
   7   2  -1   66.59    4.70
  -6  -2   1   53.79    3.70
   6  -2  -1   49.99    3.50
  -6   2   1   54.19    3.90
  -6   2   1   52.79    4.00
   6   2  -1   51.59    4.00
   5  -2  -1  163.28    5.20
  -5  -2   1  154.58    5.20
   5   2  -1  162.38    6.20
   5   2  -1  157.28    5.70
  -5   2   1  147.59    5.60
  -5   2   1  162.68    5.90
   4  -2  -1  720.63   14.40
  -4  -2   1  742.13   14.60
   4   2  -1  722.73   15.60
   4   2  -1  716.13   15.10
  -4   2   1  708.03   15.40
  -4   2   1  703.53   15.00
   3  -2  -1 2563.94   44.60
  -3  -2   1 2624.74   44.70
   3   2  -1 2589.94   46.00
  -3   2   1 2490.85   45.60
  -3   2   1 2406.46   45.10
   3   2  -1 2521.75   45.20
   2  -2  -1 1035.40   18.70
  -2  -2   1 1032.00   18.80
  -2   2   1 1029.50   18.00
   2   2  -1 1010.90   19.90
  -2   2   1 1008.00   19.30
   2   2  -1 1050.19   19.40
   2   2  -1 1035.10   17.80
  -2   2   1 1012.10   19.70
   1  -2  -1   28.10    1.70
  -1  -2   1   29.90    1.70
   1   2  -1   31.40    1.70
   1   2  -1   27.70    2.00
   1   2  -1   32.80    2.60
  -1   2   1   31.50    2.10
  -1   2   1   31.90    1.90
  -1   2   1   32.80    2.30
   0   2  -1  983.50   18.40
   0   2  -1 1001.00   18.30
   0   2   1 1000.50   18.50
   0   2   1  988.90   18.00
   0   2   1 1005.10   18.30
   0   2  -1  982.90   18.00
   0   2  -1 1005.20   18.30
   0   2   1  988.00   18.20
  -1  -2  -1  232.88    5.30
   1  -2   1  227.58    5.30
  -1   2  -1  231.28    5.40
   1   2   1  229.18    6.10
   1   2   1  230.18    5.30
  -1   2  -1  233.58    5.00
  -1   2  -1  227.68    5.80
   2  -2   1  589.24   11.40
   2  -2   1  574.44   10.20
  -2  -2  -1  589.14   11.40
   2   2   1  575.04   12.30
   2   2   1  573.14   11.50
  -2   2  -1  554.34   12.10
  -2   2  -1  580.34   11.50
  -3  -2  -1  430.16    9.20
   3  -2   1  423.86    9.00
   3   2   1  407.46    9.30
  -3   2  -1  419.86    9.30
  -3   2  -1  418.76    9.90
   3   2   1  434.06   10.20
  -4  -2  -1   85.09    3.60
   4  -2   1   82.69    3.50
   4   2   1   81.49    4.30
   4   2   1   78.79    3.70
  -4   2  -1   78.79    3.70
  -4   2  -1   73.09    4.00
  -5  -2  -1  224.28    6.50
  -5   2  -1  221.98    6.80
   5   2   1  222.98    7.40
  -5   2  -1  226.88    7.30
   5   2   1  215.58    6.80
  -6  -2  -1   31.40    3.00
   6  -2   1   35.80    3.20
  -6   2  -1   36.80    3.70
   6   2   1   33.10    3.50
   6   2   1   32.40    3.60
  -6   2  -1   35.40    3.50
   7  -2   1    5.60    2.20
  -7  -2  -1    2.60    2.00
  -7   2  -1    4.00    2.10
   7   2   1    6.00    2.50
  -7   2  -1    5.80    2.40
   7   2   1    7.30    2.30
  -8  -2  -1   27.70    3.40
   8  -2   1   25.20    3.30
  -8   2  -1   29.50    3.80
   8   2   1   37.10    4.30
  -9  -2  -1    0.20    2.70
   9  -2   1    3.70    2.80
  -9   2  -1   -1.60    2.40
   9   2   1   -2.80    2.60
   9  -3  -1    8.70    2.90
  -9  -3   1   15.60    3.50
   9   3  -1    4.40    3.10
  -9   3   1    9.30    3.30
   8  -3  -1   23.10    3.40
   8  -3  -1   25.20    3.50
  -8  -3   1   29.90    3.90
   8   3  -1   29.60    4.20
  -8   3   1   28.00    4.00
   7  -3  -1   -0.40    1.90
  -7  -3   1   -2.30    1.90
  -7  -3   1   -1.00    2.20
  -7   3   1    1.00    2.20
   7   3  -1    2.70    2.40
   6  -3  -1   50.99    3.70
  -6  -3   1   54.39    3.80
  -6   3   1   49.60    4.40
   6   3  -1   57.59    4.50
   6   3  -1   50.89    4.50
  -6   3   1   60.79    4.40
  -5  -3   1   20.60    2.40
   5  -3  -1   22.10    2.50
   5   3  -1   19.00    2.80
  -5   3   1   15.90    2.70
   5   3  -1   18.70    3.10
  -5   3   1   22.30    3.00
   4  -3  -1  282.97    7.00
  -4  -3   1  280.27    7.10
   4   3  -1  276.77    8.60
  -4   3   1  268.77    8.20
  -4   3   1  262.87    7.70
   4   3  -1  278.57    7.80
  -3  -3   1   46.10    2.60
   3  -3  -1   49.30    1.40
   3  -3  -1   51.19    2.60
   3   3  -1   39.10    3.30
   3   3  -1   47.50    3.10
  -3   3   1   49.40    3.60
  -3   3   1   47.00    3.20
  -2  -3   1  119.89    3.70
   2  -3  -1  124.29    3.80
   2   3  -1  124.99    4.90
  -2   3   1  113.99    3.40
  -2   3   1  121.79    4.30
   2   3  -1  119.39    4.30
   2   3  -1  126.29    3.10
  -2   3   1  115.79    4.60
   1  -3  -1   42.70    2.20
  -1  -3   1   40.80    2.20
   1   3  -1   38.70    3.10
  -1   3   1   37.00    2.70
  -1   3   1   43.80    2.50
  -1   3   1   41.60    2.80
   1   3  -1   42.10    2.70
   1   3  -1   43.70    2.30
   0   3  -1  562.24   11.40
   0   3   1  561.94   11.90
   0   3  -1  551.14   11.50
   0   3  -1  553.04   11.80
   0   3   1  557.54   11.60
   0   3   1  579.74   11.50
   0   3  -1  569.74   11.70
   0   3   1  554.34   11.30
  -1  -3  -1  297.07    6.90
  -1   3  -1  297.67    7.00
  -1   3  -1  291.27    7.50
  -1   3  -1  300.17    6.80
   1   3   1  300.77    6.50
   1   3   1  298.57    7.00
   1   3   1  278.37    7.60
  -2  -3  -1 1085.89   18.80
   2  -3   1 1058.39   19.10
   2  -3   1 1071.39   20.10
  -2  -3  -1 1103.99   20.20
  -2   3  -1 1043.40   20.40
   2   3   1 1066.99   21.50
   2   3   1 1039.30   20.40
  -2   3  -1 1074.29   21.20
   3  -3   1    6.90    1.50
  -3  -3  -1    7.80    1.60
  -3   3  -1    7.40    1.80
   3   3   1    7.00    1.70
   3   3   1    7.80    2.00
  -3   3  -1    5.30    1.90
   4  -3   1  112.39    4.20
  -4  -3  -1  111.09    4.30
  -4   3  -1  105.49    5.10
   4   3   1  115.39    5.50
  -4   3  -1  111.69    4.60
   4   3   1  101.49    4.40
  -5  -3  -1    9.80    2.10
   5  -3   1    8.90    1.90
  -5   3  -1   10.80    2.60
  -5   3  -1    8.80    2.10
   5   3   1    9.10    2.80
   5   3   1    8.10    2.20
   6  -3   1    7.10    1.90
  -6  -3  -1    5.80    2.10
   6   3   1    0.40    2.00
  -6   3  -1    5.20    2.30
   6   3   1    4.20    2.60
  -6   3  -1    2.00    1.80
  -7  -3  -1    1.10    2.00
   7  -3   1   -1.00    1.90
  -7   3  -1   -0.90    2.30
  -7   3  -1   -0.60    1.80
   7   3   1    2.90    2.60
   7   3   1   -1.00    2.30
   8  -3   1  108.59    5.70
  -8  -3  -1  106.09    5.90
  -8   3  -1  101.89    6.20
   8   3   1   92.99    6.30
  -9  -3  -1   58.49    5.40
   9  -3   1   55.69    5.20
  -9   3  -1   53.99    5.70
   9   3   1   54.79    5.60
   9  -4  -1    5.30    2.80
  -9  -4   1    5.80    3.00
  -9   4   1   -3.40    2.50
   9   4  -1    3.80    3.40
   8  -4  -1   28.40    4.00
  -8  -4   1   30.00    3.80
   8  -4  -1   40.50    4.20
  -8  -4   1   41.80    4.80
  -8   4   1   37.80    5.00
   8   4  -1   37.30    4.70
   7  -4  -1    3.30    2.20
  -7  -4   1    3.00    2.30
  -7  -4   1    1.10    2.60
  -7   4   1    1.80    2.50
   7   4  -1   -0.20    2.60
  -6  -4   1   33.90    3.30
   6  -4  -1   47.50    3.70
  -6   4   1   55.59    5.10
   6   4  -1   53.69    4.70
   6   4  -1   45.80    4.90
  -6   4   1   40.40    4.10
  -5  -4   1    7.50    2.00
   5  -4  -1    3.80    1.60
  -5   4   1    6.50    2.50
   5   4  -1    0.50    2.30
   5   4  -1    5.80    2.40
  -5   4   1    4.90    2.40
  -4  -4   1  203.88    6.10
   4  -4  -1  196.98    5.90
  -4   4   1  219.28    7.70
  -4   4   1  204.78    7.00
   4   4  -1  202.18    6.90
   3  -4  -1    2.80    1.30
  -3  -4   1    2.60    1.30
  -3   4   1    1.30    1.70
   3   4  -1    2.60    2.20
  -3   4   1    1.90    1.90
   3   4  -1    3.70    1.90
   2  -4  -1  131.79    4.20
  -2  -4   1  129.49    4.20
   2   4  -1  135.29    5.70
   2   4  -1  133.19    3.80
  -2   4   1  122.09    5.20
  -2   4   1  130.39    4.20
  -2   4   1  130.69    5.00
   2   4  -1  121.79    4.90
  -1  -4   1    0.50    1.10
   1   4  -1   -0.30    1.60
  -1   4   1   -0.50    1.40
  -1   4   1   -0.40    1.30
  -1   4   1    0.20    1.50
   1   4  -1    1.30    1.20
   1   4  -1   -1.00    1.40
   0   4  -1  100.39    4.20
   0   4  -1  104.49    4.40
   0   4   1  113.49    4.10
   0   4  -1  115.49    4.30
   0   4   1  109.79    4.10
   0   4  -1  112.09    4.10
   0   4   1  103.99    4.20
   0   4   1  110.09    4.60
  -1  -4  -1    0.80    1.30
  -1   4  -1    1.40    1.50
  -1   4  -1    0.50    1.40
  -1   4  -1    2.70    1.40
  -1   4  -1    5.30    1.50
   1   4   1    3.90    1.90
   1   4   1    0.80    1.10
   1   4   1    3.20    1.50
   2  -4   1   56.29    2.50
  -2  -4  -1   58.09    3.10
  -2  -4  -1   57.99    2.20
   2  -4   1   60.99    3.10
  -2   4  -1   55.89    3.80
   2   4   1   56.59    4.10
   2   4   1   58.69    3.50
  -2   4  -1   52.89    3.40
  -3  -4  -1    1.80    1.40
   3  -4   1    0.30    1.30
  -3   4  -1    0.60    1.80
   3   4   1    0.90    1.60
  -3   4  -1   -0.70    1.50
   3   4   1   -1.60    1.80
   4  -4   1  106.99    4.40
  -4  -4  -1  114.19    4.60
  -4   4  -1  106.69    5.00
  -4   4  -1  112.49    5.60
   4   4   1  103.79    5.60
   4   4   1   96.99    4.80
  -5  -4  -1    1.60    1.80
   5  -4   1    2.70    1.70
   5   4   1   -0.40    1.90
  -5   4  -1    0.20    1.80
   5   4   1    2.00    2.40
  -5   4  -1    0.50    2.20
   6  -4   1  134.79    5.60
  -6  -4  -1  129.79    5.70
   6   4   1  135.79    7.20
   6   4   1  128.09    6.30
  -6   4  -1  126.29    6.70
  -6   4  -1  128.89    6.20
  -7  -4  -1    1.50    2.20
   7  -4   1    5.30    2.30
   7   4   1   -4.40    2.60
  -7   4  -1    4.20    2.80
  -7   4  -1    0.60    2.30
   7   4   1    3.10    2.80
  -8  -4  -1   10.80    3.00
   8  -4   1   13.00    3.00
   8   4   1    7.00    3.10
  -8   4  -1   13.00    3.40
   8  -5  -1   28.00    3.90
  -8  -5   1   34.40    4.30
   8  -5  -1   31.40    4.50
  -8  -5   1   37.90    5.00
  -8   5   1   30.40    4.70
   8   5  -1   31.00    4.60
  -7  -5   1   17.20    3.20
   7  -5  -1   25.10    3.30
  -7  -5   1   24.50    4.10
   7   5  -1   25.70    4.10
  -7   5   1   23.80    3.90
  -6  -5   1   33.60    3.60
   6  -5  -1   23.20    3.00
   6   5  -1   20.00    4.20
  -6   5   1   24.50    3.90
   6   5  -1   30.90    4.10
  -6   5   1   27.50    4.30
  -5  -5   1   28.80    3.00
   5  -5  -1   27.50    2.90
   5   5  -1   19.50    3.90
  -5   5   1   22.50    3.30
  -5   5   1   25.20    3.80
   5   5  -1   24.80    3.50
  -4  -5   1   74.19    3.90
   4  -5  -1   78.69    3.90
  -4   5   1   77.19    4.90
   4   5  -1   79.39    4.90
  -4   5   1   70.49    5.10
   4   5  -1   77.99    5.70
  -3  -5   1    0.30    1.50
   3  -5  -1    0.00    1.40
  -3   5   1   -0.90    1.90
   3   5  -1    0.70    2.00
  -3   5   1    1.90    2.30
   3   5  -1   -0.50    2.20
  -2  -5   1  268.57    7.10
   2  -5  -1  269.67    7.10
  -2   5   1  263.07    8.40
  -2   5   1  274.67    7.30
  -2   5   1  268.57    8.10
   2   5  -1  267.77    8.10
  -1  -5   1    6.90    1.70
  -1   5   1    8.70    2.20
   1   5  -1    9.30    2.50
   1   5  -1    9.50    2.20
  -1   5   1    6.40    1.90
  -1   5   1    8.00    2.10
   1   5  -1    7.80    1.80
   0   5   1    0.90    1.70
   0   5   1    2.90    2.00
   0   5   1    4.00    1.70
   0   5  -1    2.80    1.70
   0   5  -1    1.90    1.80
   0   5  -1    3.60    1.80
   0   5   1    2.70    1.70
   0   5  -1    1.40    1.60
  -1  -5  -1    1.40    1.50
  -1   5  -1   -0.30    1.70
   1   5   1   -1.70    1.80
   1   5   1    2.10    1.60
   1   5   1   -0.20    1.20
  -1   5  -1   -2.00    1.50
  -1   5  -1    1.80    1.60
   2  -5   1  102.89    4.30
   2  -5   1   98.49    3.70
  -2  -5  -1   97.79    4.20
  -2   5  -1   95.89    5.10
  -2   5  -1   92.69    4.50
   2   5   1   95.49    4.60
   2   5   1   96.79    5.50
   3  -5   1   15.80    2.20
  -3  -5  -1   10.60    2.10
   3   5   1   20.90    3.50
  -3   5  -1   14.80    2.90
   3   5   1   15.50    2.60
  -3   5  -1   17.60    2.60
   4  -5   1  252.07    7.50
  -4  -5  -1  243.18    7.50
  -4   5  -1  262.87    9.20
   4   5   1  254.57    8.30
  -4   5  -1  252.87    8.20
   4   5   1  272.47    9.70
   5  -5   1   12.20    2.40
  -5  -5  -1   13.20    2.40
  -5   5  -1   13.50    3.20
  -5   5  -1   16.10    3.10
   5   5   1   19.10    4.00
   5   5   1   12.10    2.80
   6  -5   1   69.09    4.50
  -6  -5  -1   64.79    4.50
  -6   5  -1   53.09    4.90
   6   5   1   61.49    5.30
  -6   5  -1   77.59    6.40
   6   5   1   61.39    5.90
   7  -5   1   16.60    3.00
  -7  -5  -1   13.10    3.10
  -7   5  -1   17.10    3.80
   7   5   1   16.00    4.40
  -7   5  -1   11.10    3.20
   7   5   1   17.90    3.60
  -8  -5  -1    8.20    3.10
   8  -5   1   13.90    3.30
  -8  -5  -1   11.50    3.80
  -8   5  -1   10.40    3.40
   8   5   1    8.80    3.40
  -7  -6   1    2.20    2.50
   7  -6  -1   -2.30    2.10
  -7  -6   1   -2.80    2.80
   7  -6  -1   -1.70    2.40
   7   6  -1   -2.00    2.70
  -7   6   1   -2.00    2.60
  -6  -6   1    8.20    2.60
   6  -6  -1   14.80    2.80
  -6   6   1   12.60    3.60
  -6   6   1   12.00    3.40
   6   6  -1   18.70    4.10
  -5  -6   1   30.30    3.30
   5  -6  -1   24.90    2.90
  -5   6   1   25.90    3.90
   5   6  -1   25.60    4.50
   5   6  -1   34.00    4.20
  -5   6   1   26.90    4.20
   4  -6  -1   17.20    2.50
  -4  -6   1   20.20    2.70
  -4   6   1   15.50    3.20
   4   6  -1   19.40    3.40
   4   6  -1   24.30    4.30
  -4   6   1   29.70    4.20
   3  -6  -1    5.20    1.90
  -3  -6   1    7.30    2.10
  -3   6   1    7.60    2.70
   3   6  -1    5.60    2.90
  -3   6   1    1.10    2.40
   3   6  -1   12.90    2.90
  -2  -6   1   37.50    3.10
   2  -6  -1   32.80    2.90
   2   6  -1   40.10    4.50
  -2   6   1   35.80    3.70
   2   6  -1   36.70    3.80
  -2   6   1   27.40    3.50
   1  -6  -1   22.90    2.60
  -1  -6   1   22.10    2.50
   1   6  -1   19.80    2.90
  -1   6   1   25.60    3.10
  -1   6   1   26.90    3.40
   1   6  -1   30.10    3.80
   1   6  -1   22.80    2.70
  -1   6   1   23.60    3.10
   0   6  -1   97.69    4.80
   0   6   1  106.69    5.00
   0   6  -1  102.89    5.30
   0   6  -1   96.49    5.00
   0   6   1  102.19    5.60
   0   6  -1   94.49    4.90
   0   6   1   99.49    4.80
   0   6   1  100.59    4.90
  -1  -6  -1   22.30    2.70
   1  -6   1   21.50    2.70
  -1   6  -1   20.60    3.10
   1   6   1   16.40    3.10
  -1   6  -1   18.80    2.80
   1   6   1   21.30    2.80
   2  -6   1    0.50    1.70
  -2  -6  -1    0.50    1.60
  -2   6  -1    2.70    2.00
  -2   6  -1    0.70    2.20
   2   6   1    0.40    1.90
   2   6   1   -2.00    2.10
   3  -6   1   47.00    3.70
  -3  -6  -1   39.30    3.40
   3   6   1   49.60    4.30
  -3   6  -1   43.90    4.10
   3   6   1   38.60    4.30
  -3   6  -1   33.80    4.10
  -4  -6  -1    9.00    2.30
   4  -6   1    7.60    2.20
   4   6   1   10.80    2.90
  -4   6  -1   12.70    3.30
   4   6   1    9.60    3.20
  -4   6  -1   11.60    3.00
   5  -6   1    2.40    1.90
  -5  -6  -1    0.40    2.10
  -5   6  -1    2.90    2.90
   5   6   1    2.10    3.20
  -5   6  -1   -0.90    2.30
   5   6   1    4.00    2.80
   6  -6   1   -0.20    2.00
  -6  -6  -1    0.60    2.30
  -6   6  -1   -0.30    3.00
  -6   6  -1   -3.70    2.30
   6   6   1   -2.10    3.10
   6   6   1   -4.80    2.30
  -7  -6  -1    0.20    2.60
   7  -6   1   -0.20    2.40
  -7   6  -1   -0.80    2.60
  -7   6  -1    0.60    3.10
   7   6   1   -4.10    2.60
  -6  -7   1   33.60    4.80
   6   7  -1   31.90    4.70
  -6   7   1   35.30    5.00
  -5  -7   1   43.90    4.10
   5   7  -1   42.10    4.90
  -5   7   1   35.40    4.60
  -4  -7   1    0.20    2.00
   4  -7  -1   -0.30    1.70
  -4   7   1    4.50    2.90
   4   7  -1    0.80    3.20
  -4   7   1    4.70    2.80
   4   7  -1    1.80    2.80
  -3  -7   1   38.40    3.50
   3  -7  -1   35.30    3.30
   3   7  -1   28.30    4.50
  -3   7   1   34.60    4.30
  -3   7   1   39.00    4.30
   3   7  -1   31.40    4.10
   2  -7  -1   32.60    3.20
  -2  -7   1   36.60    3.30
  -2   7   1   36.80    4.10
   2   7  -1   32.50    3.90
  -2   7   1   42.30    4.40
   2   7  -1   38.50    4.80
   1  -7  -1   22.90    2.80
  -1  -7   1   22.10    2.80
  -1   7   1   28.60    3.60
   1   7  -1   23.00    3.40
   1   7  -1   23.30    3.80
  -1   7   1   20.90    3.10
   0   7   1   -0.70    2.20
   0   7   1   -0.50    1.90
   0   7  -1   -1.00    1.80
   0   7  -1    0.40    2.10
   1  -7   1   10.80    2.40
  -1  -7  -1    9.10    2.30
   1   7   1    5.20    2.40
  -1   7  -1   11.30    2.90
   1   7   1    8.80    2.90
  -1   7  -1    9.90    2.50
   2  -7   1    7.80    2.30
  -2  -7  -1    7.30    2.20
  -2   7  -1    6.90    2.80
   2   7   1   12.30    2.90
   2   7   1   16.00    3.70
  -2   7  -1    9.80    2.50
   3  -7   1  105.39    5.20
  -3  -7  -1   97.89    5.10
   3   7   1  105.89    7.20
   3   7   1  102.09    5.90
  -3   7  -1  108.79    6.60
  -3   7  -1   94.99    5.80
   4  -7   1   18.00    2.90
  -4  -7  -1   17.50    2.80
  -4   7  -1   20.30    4.10
   4   7   1   15.60    4.20
   4   7   1   20.90    3.70
  -4   7  -1   14.90    3.60
  -5  -7  -1   11.80    2.90
   5  -7   1    6.90    2.50
   5   7   1   14.00    3.40
  -5   7  -1    9.50    3.70
   5   7   1    4.60    3.70
   6  -7   1   12.00    3.00
  -6  -7  -1   14.80    3.30
   6   7   1   13.70    4.70
   6   7   1   19.30    4.00
  -6   7  -1   13.90    3.90
  -5  -8   1   51.39    7.40
   5  -8  -1   40.30    5.30
   5   8  -1   42.50    5.90
  -4  -8   1    0.20    3.10
   4   8  -1   -1.80    2.90
   3   8  -1    8.60    3.10
  -2  -8   1    6.30    3.00
   2   8  -1    5.20    2.70
   1  -8  -1   57.49    4.90
  -1  -8   1   65.19    5.40
   1   8  -1   62.99    5.20
   0  -8   1   -0.60    2.20
   0   8   1   -3.40    2.40
   0   8  -1    0.40    2.40
   1  -8   1   68.49    4.70
   1   8   1   66.39    6.00
  -1   8  -1   59.79    5.30
   2  -8   1    2.70    2.40
   2   8   1    7.50    3.20
  -2   8  -1    5.50    2.70
   3   8   1    5.50    3.50
  -3   8  -1   -0.10    2.70
   4   8   1    7.80    3.80
  -4   8  -1   14.10    3.80
  -2  -9   1   -4.20    3.00
   2  -9  -1   -3.90    2.20
  -1  -9   1   37.70    4.90
  -1  -9  -1   41.10    4.90
 -10   0   2    3.30    3.30
  10   0  -2    6.50    3.50
   9   0  -2   -1.30    2.60
  -9   0   2    6.10    2.80
  -8   0   2   11.90    2.90
   8   0  -2   18.60    3.40
  -7   0   2    1.80    2.00
   7   0  -2    3.80    2.10
   6   0  -2  604.54   12.70
   6   0  -2  618.24   13.80
  -6   0   2  623.34   13.90
  -5   0   2    0.10    1.40
   5   0  -2    2.50    1.50
   5   0  -2    1.40    1.20
  -5   0   2    1.90    1.10
   4   0  -2   15.40    1.60
  -4   0   2   15.50    1.80
   4   0  -2   13.30    1.80
  -4   0   2   15.60    1.50
   3   0  -2   -0.70    0.90
  -3   0   2   -0.80    1.00
   3   0  -2   -0.20    1.00
  -3   0   2    0.20    0.80
   2   0  -2 7474.75  126.29
  -2   0   2 7510.85  126.09
  -2   0   2 7171.48  125.59
   2   0  -2 7047.10  126.29
   1   0  -2    2.90    0.60
  -1   0   2    4.10    0.70
   1   0  -2    3.30    0.70
  -1   0   2    4.20    0.70
   0   0  -2  728.03   12.20
   0   0   2  672.63   12.20
   0   0   2  736.93   12.20
   0   0  -2  664.33   12.20
   1   0   2   32.20    1.30
   1   0   2   30.00    1.40
  -1   0  -2   31.00    1.40
  -2   0  -2    7.20    1.20
   2   0   2    4.90    1.10
  -2   0  -2    4.00    1.00
   2   0   2    4.90    1.00
  -3   0  -2   -1.30    0.80
   3   0   2    0.60    1.00
  -3   0  -2   -0.60    1.00
   3   0   2    0.80    1.10
   4   0   2  195.18    5.40
  -4   0  -2  189.88    5.50
  -4   0  -2  207.68    5.40
   4   0   2  206.98    5.30
  -5   0  -2    0.20    1.40
  -5   0  -2   -1.40    1.20
   5   0   2    1.30    1.40
   5   0   2    2.10    1.40
  -6   0  -2   60.19    4.30
  -6   0  -2   59.49    3.80
   6   0   2   54.19    3.60
  -7   0  -2   -1.90    1.60
   7   0   2    2.00    2.00
  -8   0  -2   16.20    3.00
   8   0   2   17.20    3.30
   9   0   2    1.10    2.50
  -9   0  -2   -0.50    2.20
  -9  -1   2    3.70    2.70
   9  -1  -2    6.70    2.90
  -9   1   2    5.40    2.80
   9   1  -2    1.30    2.50
   8  -1  -2  101.29    5.70
  -8  -1   2  109.09    5.80
   8   1  -2   94.89    5.90
  -8   1   2   89.19    5.40
  -7  -1   2   31.90    3.40
   7  -1  -2   29.90    3.30
  -7   1   2   25.20    3.30
   7   1  -2   28.80    3.30
   6  -1  -2  113.69    4.80
  -6  -1   2  124.89    4.60
  -6  -1   2  105.89    4.60
   6  -1  -2  128.69    4.80
  -6   1   2  115.69    5.20
   6   1  -2  126.39    5.20
  -5  -1   2   96.89    4.00
  -5  -1   2   91.59    3.90
   5  -1  -2   98.49    4.00
  -5   1   2   90.79    4.10
   5   1  -2  101.69    2.90
   5   1  -2  102.69    4.20
  -4  -1   2  400.76    9.00
  -4   1   2  395.26    9.20
  -4   1   2  412.26    7.60
   4   1  -2  416.16    7.80
   4   1  -2  395.66    9.30
  -4   1   2  397.56    9.30
  -3  -1   2  431.66    9.00
   3  -1  -2  435.86    8.90
   3   1  -2  432.76    9.30
   3   1  -2  446.26    8.00
  -3   1   2  421.46    9.20
   3   1  -2  430.46    9.50
  -3   1   2  439.16    9.50
  -3   1   2  439.26    7.90
  -2  -1   2 2182.58   38.20
   2  -1  -2 2161.08   38.20
  -2   1   2 2222.08   38.80
   2   1  -2 2194.18   37.50
   2   1  -2 2196.48   38.90
   2   1  -2 2212.88   38.70
  -2   1   2 2177.18   37.60
  -2   1   2 2243.38   38.70
   1  -1  -2 1155.48   20.00
  -1  -1   2 1120.69   20.00
   1   1  -2 1165.38   19.90
  -1   1   2 1147.89   20.50
   1   1  -2 1147.49   20.50
  -1   1   2 1148.99   20.00
   0  -1  -2  492.65    9.00
   0   1  -2  496.65    8.80
   0   1  -2  499.65    9.20
   0   1   2  479.65    8.80
   0   1   2  500.45    9.30
   0   1  -2  478.25    9.20
   1  -1   2   34.50    1.10
  -1  -1  -2   34.40    1.00
   1  -1   2   33.30    1.80
  -1   1  -2   35.00    2.10
   1   1   2   35.10    2.30
  -1   1  -2   35.90    1.50
   1   1   2   37.80    1.60
  -2  -1  -2 1890.31   32.80
   2  -1   2 1858.81   32.80
  -2  -1  -2 1859.31   31.90
   2  -1   2 1830.82   31.90
  -2   1  -2 1835.72   33.30
  -2   1  -2 1893.11   32.80
   2   1   2 1877.81   32.80
   2   1   2 1852.11   33.40
  -3  -1  -2   79.89    3.00
  -3  -1  -2   80.09    2.30
   3  -1   2   84.99    3.00
   3  -1   2   78.39    2.20
  -3   1  -2   72.29    2.80
   3   1   2   85.79    3.10
  -3   1  -2   83.69    3.40
   3   1   2   83.59    3.60
  -4  -1  -2  576.94   11.90
  -4  -1  -2  573.44   10.90
   4  -1   2  568.74   10.60
   4  -1   2  574.34   11.90
   4   1   2  562.04   12.30
  -4   1  -2  577.14   12.30
  -4   1  -2  558.34   11.90
   4   1   2  545.05   11.90
   5  -1   2    1.40    1.40
  -5  -1  -2    1.80    1.40
  -5  -1  -2   -0.90    1.00
   5   1   2    3.00    1.80
   5   1   2   -0.40    1.30
  -5   1  -2   -0.80    1.40
  -5   1  -2   -1.50    1.30
   6  -1   2  394.46    9.90
  -6  -1  -2  389.96   10.00
  -6   1  -2  403.26   10.20
  -6   1  -2  401.06   10.30
   6   1   2  401.06   10.30
   6   1   2  405.26   10.30
   7  -1   2   15.10    2.80
  -7  -1  -2   16.10    2.80
   7   1   2   12.40    2.70
  -7   1  -2   19.80    2.90
   8  -1   2   37.20    4.10
  -8  -1  -2   41.40    4.30
   8   1   2   41.10    4.40
  -8   1  -2   40.90    4.30
  -9  -1  -2    6.20    2.70
   9  -1   2    3.10    2.80
  -9   1  -2    4.70    2.70
   9   1   2    5.90    2.90
  -9  -2   2   96.49    6.00
   9  -2  -2   90.59    5.90
   9   2  -2   92.69    6.10
  -9   2   2   86.49    6.20
   8  -2  -2   11.80    2.90
  -8  -2   2   11.60    2.90
   8   2  -2   10.40    3.20
  -8   2   2   16.00    3.50
   7  -2  -2  183.98    6.60
   7  -2  -2  194.58    6.90
  -7  -2   2  187.08    6.50
  -7  -2   2  180.48    6.70
   7   2  -2  182.08    7.30
  -7   2   2  183.78    7.10
  -6  -2   2  112.99    5.10
   6  -2  -2  107.79    4.60
  -6  -2   2  121.09    4.90
   6   2  -2  117.89    5.40
  -6   2   2  102.19    5.00
  -5  -2   2   25.20    2.50
   5  -2  -2   23.30    2.20
   5   2  -2   23.60    2.70
  -5   2   2   24.20    2.70
  -5   2   2   23.10    2.80
   4  -2  -2  252.47    6.30
  -4  -2   2  256.97    6.50
   4   2  -2  261.17    7.50
  -4   2   2  242.48    7.30
  -4   2   2  247.78    7.00
   4   2  -2  254.37    7.10
  -3  -2   2  656.43   12.70
   3  -2  -2  659.93   12.60
  -3   2   2  634.44   13.60
  -3   2   2  609.94   13.20
   3   2  -2  622.94   13.20
   3   2  -2  677.03   14.00
  -2  -2   2  489.25    9.60
   2  -2  -2  494.15    9.60
  -2   2   2  481.15   10.20
   2   2  -2  499.85    8.90
  -2   2   2  488.85   10.60
  -2   2   2  481.05    9.10
   2   2  -2  490.55   10.80
   2   2  -2  489.15   10.30
   1  -2  -2   65.29    2.20
  -1  -2   2   64.89    2.20
   1   2  -2   62.59    2.90
   1   2  -2   61.19    2.30
  -1   2   2   63.99    2.70
   1   2  -2   60.29    2.80
  -1   2   2   64.49    2.90
  -1   2   2   64.39    2.50
   0   2   2  119.49    3.60
   0   2  -2  115.49    3.20
   0   2  -2  116.59    3.60
   0   2   2  112.09    3.10
   0   2   2  116.89    3.30
   0   2  -2  113.69    3.60
   0   2   2  110.29    3.70
   0   2  -2  112.29    3.60
   1  -2   2  581.94   11.60
  -1  -2  -2  608.04   11.70
   1  -2   2  599.84   11.00
  -1  -2  -2  596.04   10.90
  -1   2  -2  611.54   11.50
   1   2   2  614.54   11.50
   1   2   2  596.94   12.40
  -1   2  -2  579.54   12.10
   2  -2   2   92.69    2.10
  -2  -2  -2   91.69    1.90
  -2  -2  -2   97.09    3.30
   2  -2   2   95.49    3.20
   2   2   2   90.29    3.20
  -2   2  -2   93.59    3.90
  -2   2  -2  101.19    3.30
   2   2   2   96.99    4.10
   3  -2   2  109.69    3.70
  -3  -2  -2  117.69    3.80
   3   2   2  112.19    3.90
  -3   2  -2  105.39    3.80
   3   2   2  109.49    4.70
  -3   2  -2  106.39    4.50
  -4  -2  -2   80.29    3.50
   4  -2   2   78.59    3.50
  -4   2  -2   77.39    3.60
  -4   2  -2   78.29    4.10
   4   2   2   76.79    4.20
   4   2   2   79.99    3.70
   5  -2   2  178.38    5.60
  -5  -2  -2  179.48    5.80
   5   2   2  172.68    6.50
  -5   2  -2  168.18    5.70
   5   2   2  169.68    5.90
  -5   2  -2  179.98    6.40
  -6  -2  -2   26.00    3.00
   6  -2   2   18.00    2.50
   6   2   2   23.00    3.20
  -6   2  -2   20.90    2.70
   6   2   2   25.60    3.00
  -6   2  -2   19.40    3.00
   7  -2   2   12.00    2.60
  -7  -2  -2   14.60    2.90
   7   2   2   12.30    2.80
  -7   2  -2    5.60    2.30
   7   2   2   13.20    2.80
  -7   2  -2   12.10    2.70
  -8  -2  -2  111.59    5.70
   8  -2   2  121.89    5.80
  -8   2  -2  122.69    6.40
   8   2   2  128.39    6.60
  -9  -2  -2    9.10    3.30
   9  -2   2    5.20    2.90
  -9   2  -2    3.50    2.80
   9   2   2    9.80    3.10
  -9  -3   2   10.00    3.30
   9  -3  -2   10.40    3.10
   9   3  -2    4.00    3.20
  -9   3   2   14.60    3.60
   8  -3  -2    4.50    2.40
  -8  -3   2    8.30    2.70
   8  -3  -2    9.10    2.70
  -8   3   2    5.20    2.80
   8   3  -2    2.40    2.70
   7  -3  -2   22.20    2.90
   7  -3  -2   24.30    3.40
  -7  -3   2   20.40    3.30
  -7  -3   2   26.50    3.40
  -7   3   2   27.80    3.90
   7   3  -2   28.80    3.90
  -6  -3   2   18.30    2.60
   6  -3  -2   17.70    2.50
   6   3  -2   19.30    3.00
  -6   3   2   17.30    3.00
  -6   3   2   23.60    3.30
  -5  -3   2   90.19    4.10
   5  -3  -2   82.99    3.80
  -5   3   2   77.19    4.60
  -5   3   2   88.49    5.10
   5   3  -2   91.19    5.20
   5   3  -2   87.69    4.70
  -4  -3   2   64.09    3.20
   4  -3  -2   58.59    3.00
  -4   3   2   60.79    4.10
   4   3  -2   63.09    3.60
   4   3  -2   62.29    4.30
  -4   3   2   61.89    3.80
   3  -3  -2  230.58    5.70
  -3  -3   2  228.28    5.70
  -3   3   2  220.98    6.90
   3   3  -2  214.58    7.10
   3   3  -2  213.48    6.40
  -3   3   2  217.78    4.60
  -3   3   2  230.38    6.60
  -2  -3   2   64.99    2.60
   2  -3  -2   60.99    2.60
   2   3  -2   58.79    3.50
  -2   3   2   62.59    2.50
  -2   3   2   65.99    3.40
   2   3  -2   59.89    3.30
   2   3  -2   61.09    2.20
  -2   3   2   59.59    3.50
   1  -3  -2  424.56    8.60
  -1  -3   2  414.26    8.60
  -1   3   2  416.16    9.10
   1   3  -2  405.16    9.30
  -1   3   2  413.66    9.40
   1   3  -2  418.76    8.70
  -1   3   2  419.96    9.40
   1   3  -2  404.66    9.70
   0   3  -2  183.98    4.80
   0   3  -2  180.18    5.20
   0   3  -2  174.68    5.10
   0   3  -2  173.48    5.00
   0   3   2  171.98    5.20
   0   3   2  182.78    5.40
   0   3   2  177.28    4.90
   0   3   2  180.68    4.70
   1  -3   2  724.13   13.80
  -1  -3  -2  749.53   14.40
  -1  -3  -2  728.13   13.60
  -1   3  -2  712.73   14.20
   1   3   2  733.23   14.30
   1   3   2  726.53   15.30
  -1   3  -2  716.63   14.90
  -2  -3  -2  467.65    9.70
   2  -3   2  437.36    8.60
  -2  -3  -2  439.06    8.30
   2  -3   2  458.25    9.60
  -2   3  -2  432.06   10.50
   2   3   2  450.15    9.80
  -2   3  -2  440.96    9.70
   2   3   2  440.16   10.90
  -3  -3  -2   92.79    3.70
   3  -3   2   97.49    3.80
   3  -3   2   91.89    2.00
   3   3   2  103.79    4.90
  -3   3  -2   85.89    3.80
  -3   3  -2   87.39    4.50
   3   3   2   98.99    4.00
  -4  -3  -2  155.38    5.10
   4  -3   2  147.59    4.90
   4   3   2  138.49    5.10
   4   3   2  142.79    5.90
  -4   3  -2  139.49    5.20
  -4   3  -2  135.49    5.80
  -5  -3  -2   47.40    3.50
   5  -3   2   52.89    3.50
   5   3   2   45.10    3.40
   5   3   2   47.50    4.30
  -5   3  -2   49.50    4.20
  -5   3  -2   50.49    3.70
   6  -3   2    0.10    1.70
  -6  -3  -2    0.50    1.90
   6   3   2    0.40    2.00
  -6   3  -2   -2.80    2.00
  -6   3  -2    3.90    2.10
   6   3   2    3.50    2.40
   7  -3   2   15.30    2.90
  -7  -3  -2   12.90    2.80
  -7   3  -2   15.10    2.80
   7   3   2   12.50    3.20
  -7   3  -2   12.50    3.20
   7   3   2   12.90    3.00
   8  -3   2   61.29    4.50
  -8  -3  -2   58.49    4.80
  -8   3  -2   57.29    5.10
  -8   3  -2   48.90    4.80
   8   3   2   55.39    5.30
  -9  -3  -2   63.39    5.60
   9  -3   2   45.00    4.80
  -9   3  -2   45.50    5.10
   9   3   2   41.50    5.20
   9  -4  -2   13.60    3.20
   9  -4  -2   16.60    3.90
  -9  -4   2   18.00    3.50
   9   4  -2   16.20    4.10
  -9   4   2   18.80    4.10
   8  -4  -2    7.50    2.90
  -8  -4   2    9.70    3.10
   8  -4  -2    5.40    2.60
  -8  -4   2    9.20    3.20
   8   4  -2    6.20    3.00
  -8   4   2    9.20    3.20
   7  -4  -2   54.69    4.20
  -7  -4   2   59.09    4.50
   7  -4  -2   57.49    5.10
  -7  -4   2   65.89    5.30
   7   4  -2   56.89    5.40
  -7   4   2   57.69    5.30
   6  -4  -2    0.30    1.70
  -6  -4   2    1.20    1.90
  -6   4   2    0.80    2.30
   6   4  -2   -0.60    2.30
  -6   4   2   -1.10    2.10
  -5  -4   2  134.69    5.00
   5  -4  -2  116.19    4.60
   5   4  -2  119.09    6.40
  -5   4   2  118.59    5.60
   5   4  -2  126.89    5.90
  -5   4   2  131.99    6.30
  -4  -4   2    1.30    1.50
   4  -4  -2    3.30    1.40
  -4   4   2   -2.00    1.90
   4   4  -2    1.80    1.80
  -4   4   2    0.50    1.90
   4   4  -2   -0.20    2.10
   3  -4  -2   35.10    2.40
  -3  -4   2   36.20    2.50
  -3   4   2   38.40    3.50
  -3   4   2   37.40    3.50
   3   4  -2   42.70    3.50
   3   4  -2   28.40    3.20
   2  -4  -2    3.00    1.10
  -2  -4   2    1.30    1.20
   2   4  -2   -0.10    1.80
   2   4  -2    1.30    1.70
  -2   4   2   -1.00    1.60
  -2   4   2    1.20    1.70
   2   4  -2    3.10    1.10
  -2   4   2    2.80    1.30
  -1  -4   2    0.70    1.10
  -1   4   2    2.00    1.60
  -1   4   2   -0.10    1.60
   1   4  -2    0.20    1.20
   1   4  -2    0.20    1.40
  -1   4   2    0.50    1.40
   1   4  -2   -0.70    1.60
   0   4  -2    4.10    1.70
   0   4  -2    4.90    1.70
   0   4   2    4.00    1.80
   0   4   2    3.60    1.50
   0   4  -2    3.60    1.40
   0   4   2    4.90    1.70
   0   4   2    4.60    1.40
   0   4  -2    3.00    1.60
  -1  -4  -2   72.59    2.90
  -1  -4  -2   75.89    3.40
   1   4   2   81.19    3.60
  -1   4  -2   78.59    3.60
  -1   4  -2   74.19    3.60
  -1   4  -2   70.19    3.90
   1   4   2   72.99    4.30
   2  -4   2    2.60    1.40
  -2  -4  -2    3.00    0.90
   2  -4   2    5.10    1.10
  -2  -4  -2    5.30    1.60
  -2   4  -2    3.30    2.00
  -2   4  -2    5.90    1.70
   2   4   2    3.20    1.60
   2   4   2    4.10    2.20
  -3  -4  -2  149.99    5.10
   3  -4   2  143.89    4.90
   3   4   2  141.49    5.30
  -3   4  -2  135.09    5.80
   3   4   2  138.69    6.10
  -3   4  -2  148.59    5.30
  -4  -4  -2    3.00    1.50
   4  -4   2    0.50    1.50
  -4   4  -2    1.80    2.20
  -4   4  -2    1.20    1.70
   4   4   2   -0.30    1.70
   4   4   2   -0.40    2.40
   5  -4   2  145.69    5.50
  -5  -4  -2  147.59    5.70
  -5   4  -2  151.08    6.20
  -5   4  -2  143.39    6.70
   5   4   2  151.48    6.20
   5   4   2  148.39    6.90
   6  -4   2    0.00    1.80
  -6  -4  -2    0.50    1.90
  -6   4  -2   -0.40    2.40
   6   4   2   -1.60    2.50
  -6   4  -2    1.70    2.10
   6   4   2    5.50    2.40
  -7  -4  -2   29.50    3.50
   7  -4   2   37.30    3.90
   7   4   2   42.00    4.50
   7   4   2   33.00    4.50
  -7   4  -2   38.70    4.70
  -7   4  -2   46.80    4.70
  -8  -4  -2   -2.00    2.40
   8  -4   2    1.70    2.50
   8   4   2    1.10    2.80
  -8   4  -2    5.00    3.00
  -8   4  -2    2.70    2.60
   8  -5  -2    1.40    2.50
  -8  -5   2    2.10    2.60
   8  -5  -2    5.20    2.50
  -8  -5   2    3.90    3.00
   8   5  -2   -0.10    3.10
  -8   5   2    2.50    2.90
   7  -5  -2   48.80    4.30
  -7  -5   2   42.20    3.90
  -7  -5   2   50.29    5.10
   7  -5  -2   48.10    5.00
  -7   5   2   40.10    4.80
   7   5  -2   49.00    5.00
  -6  -5   2    8.60    2.50
   6  -5  -2   10.20    2.20
  -6   5   2    5.50    2.80
   6   5  -2    3.20    2.90
  -5  -5   2  114.49    4.90
   5  -5  -2  106.59    4.80
  -5   5   2  110.79    6.40
   5   5  -2  115.49    6.10
  -5   5   2  102.99    5.80
   5   5  -2  113.59    6.80
   4  -5  -2    2.80    1.50
  -4  -5   2    1.40    1.60
   4   5  -2   -0.80    2.00
   4   5  -2    1.00    2.50
  -4   5   2    4.70    2.50
  -4   5   2    1.30    2.30
   3  -5  -2  341.57    8.50
  -3  -5   2  348.47    8.60
   3   5  -2  330.47   10.40
  -3   5   2  349.17    9.90
   3   5  -2  350.56    9.90
  -3   5   2  347.57   10.20
   2  -5  -2    7.10    1.60
  -2  -5   2    7.50    1.60
   2   5  -2    5.30    2.40
  -2   5   2    6.10    1.70
  -2   5   2    9.30    2.40
   2   5  -2    6.40    2.10
  -2   5   2    6.70    2.30
  -1  -5   2  236.18    6.40
  -1   5   2  222.68    7.20
   1   5  -2  229.68    7.80
  -1   5   2  228.58    7.30
  -1   5   2  228.78    7.10
   1   5  -2  242.08    7.40
   1   5  -2  237.28    6.70
   0   5  -2    2.50    1.80
   0   5   2    1.10    1.50
   0   5  -2    0.50    1.70
   0   5   2    1.40    1.90
   0   5   2    0.00    1.70
   0   5  -2    1.90    1.80
   0   5  -2    0.50    1.40
   0   5   2    0.50    1.50
  -1  -5  -2  139.09    5.00
  -1  -5  -2  128.99    4.40
   1  -5   2  133.99    4.80
   1   5   2  129.69    5.90
  -1   5  -2  132.29    5.60
   1   5   2  136.89    5.10
  -1   5  -2  142.29    5.20
   2  -5   2    8.70    1.90
   2  -5   2   10.80    1.60
  -2  -5  -2    6.20    1.80
  -2   5  -2    8.30    2.10
   2   5   2    8.30    2.60
   2   5   2   10.40    2.20
  -2   5  -2    8.40    2.50
   3  -5   2  467.15   11.00
  -3  -5  -2  458.65   11.00
  -3   5  -2  454.95   11.40
  -3   5  -2  423.16   12.20
   3   5   2  455.65   11.40
   3   5   2  478.15   13.10
  -4  -5  -2   10.70    2.20
   4  -5   2   12.00    2.20
  -4   5  -2   12.30    2.60
   4   5   2   11.50    2.50
   4   5   2    5.90    2.70
  -4   5  -2   14.60    3.10
  -5  -5  -2  105.59    5.10
   5  -5   2  111.59    5.10
   5   5   2  113.29    6.00
  -5   5  -2  120.69    5.90
  -5   5  -2   99.69    6.30
   5   5   2  111.79    7.00
  -6  -5  -2    1.90    2.20
   6  -5   2    0.20    2.10
  -6   5  -2    2.90    2.50
  -6   5  -2    2.00    2.90
   6   5   2    2.90    3.20
   6   5   2    2.50    2.60
  -7  -5  -2    4.60    2.80
   7  -5   2    4.20    2.50
  -7   5  -2   11.10    3.20
   7   5   2    9.60    3.30
   7   5   2    5.00    3.60
  -7   5  -2    5.30    3.30
   8  -5   2    0.70    2.40
  -8  -5  -2    0.00    2.60
  -8   5  -2    1.00    3.10
  -8   5  -2    6.20    3.10
   8   5   2    3.70    3.10
  -7  -6   2   11.60    3.00
   7  -6  -2    9.30    2.70
  -7  -6   2   11.00    3.70
   7  -6  -2   12.00    3.50
  -7   6   2    7.20    3.50
   7   6  -2   20.40    4.20
   6  -6  -2    4.70    2.20
  -6  -6   2    5.20    2.40
  -6  -6   2   11.60    3.50
  -6   6   2    7.30    3.20
   6   6  -2    9.80    3.30
  -5  -6   2   52.19    4.00
   5  -6  -2   50.09    3.80
   5   6  -2   54.59    5.00
  -5   6   2   47.60    5.20
  -5   6   2   56.49    5.40
  -4  -6   2   24.60    2.70
   4  -6  -2   28.70    2.90
   4   6  -2   17.80    3.80
  -4   6   2   26.10    3.80
  -4   6   2   22.90    3.70
   4   6  -2   33.30    4.20
  -3  -6   2    9.70    2.10
   3  -6  -2   10.90    2.00
  -3   6   2   11.20    3.00
   3   6  -2    8.20    3.00
  -3   6   2   11.40    2.90
   3   6  -2   11.90    2.90
   2  -6  -2    4.30    1.60
  -2  -6   2    1.70    1.50
  -2   6   2    1.10    2.20
   2   6  -2    1.10    2.30
   2   6  -2    0.30    2.20
  -2   6   2    2.40    2.30
   1  -6  -2  166.38    5.80
  -1  -6   2  169.28    5.70
  -1   6   2  178.28    6.70
   1   6  -2  172.98    7.20
  -1   6   2  179.28    6.80
   1   6  -2  176.88    6.80
   1   6  -2  165.38    5.90
  -1   6   2  176.08    6.70
   0   6  -2   49.60    4.00
   0   6  -2   67.99    4.00
   0   6   2   63.79    4.60
   0   6  -2   56.29    4.20
   0   6   2   58.19    3.80
   0   6   2   70.69    4.40
  -1  -6  -2  162.08    6.00
   1  -6   2  167.58    5.90
  -1  -6  -2  165.08    5.50
  -1   6  -2  173.48    6.30
   1   6   2  155.18    7.10
  -1   6  -2  170.88    6.90
   1   6   2  165.28    6.20
  -2  -6  -2   14.90    2.40
   2  -6   2   12.40    2.30
   2   6   2   12.00    3.10
  -2   6  -2   10.30    2.40
  -2   6  -2    9.60    2.90
   2   6   2   17.30    2.80
   3  -6   2  277.67    8.30
  -3  -6  -2  277.77    8.30
   3   6   2  293.37    9.00
  -3   6  -2  297.07   10.00
   3   6   2  286.07   10.50
  -3   6  -2  282.87    9.00
   4  -6   2   14.60    2.60
  -4  -6  -2    7.20    2.20
  -4   6  -2    8.90    2.70
  -4   6  -2   10.00    3.20
   4   6   2    7.10    3.20
   4   6   2    4.20    2.50
   5  -6   2   47.60    4.00
  -5  -6  -2   56.39    4.40
   5   6   2   55.09    5.00
   5   6   2   57.49    6.10
  -5   6  -2   66.79    5.00
  -5   6  -2   50.69    5.30
   6  -6   2   24.60    3.30
  -6  -6  -2   17.70    3.20
   6   6   2   29.20    5.10
   6   6   2   16.20    3.60
  -6   6  -2   20.80    3.70
  -6   6  -2   23.90    4.40
  -7  -6  -2   -1.90    2.40
   7  -6   2    2.40    2.50
   7   6   2    2.60    2.90
  -7   6  -2   -1.80    2.50
   7   6   2   -3.10    3.30
  -7   6  -2    5.70    3.40
   6  -7  -2   89.09    6.70
  -6  -7   2   88.69    7.00
  -6   7   2   80.09    6.90
   6   7  -2   80.69    6.80
  -5  -7   2    0.00    2.90
  -5   7   2    3.60    3.00
   5   7  -2    0.90    2.80
  -4   7   2   -1.40    2.70
   4   7  -2   -1.90    2.60
   3   7  -2   36.00    4.40
  -3   7   2   49.00    4.80
   2  -7  -2   33.50    3.70
   2   7  -2   28.10    3.70
  -2   7   2   28.50    3.80
  -1  -7   2   49.60    4.40
   1  -7  -2   50.69    3.80
  -1   7   2   51.99    4.60
   1   7  -2   51.09    4.60
   0  -7   2   26.00    3.30
   0  -7  -2   30.40    3.10
   0   7   2   21.80    4.30
   0   7  -2   28.10    3.50
   0   7  -2   26.60    3.40
   0   7   2   20.90    3.50
  -1  -7  -2   89.49    5.00
   1  -7   2   95.29    5.00
   1   7   2   87.39    6.20
   1   7   2   82.39    5.10
  -1   7  -2   98.39    5.90
   2  -7   2    9.20    2.40
  -2  -7  -2   14.50    2.60
   2   7   2   13.30    3.40
  -2   7  -2   18.60    3.60
   2   7   2   13.20    2.80
  -3  -7  -2   42.60    3.90
   3  -7   2   41.90    3.90
   3   7   2   34.40    4.00
   3   7   2   39.40    5.20
  -3   7  -2   40.40    4.80
   4  -7   2   36.20    3.70
  -4  -7  -2   30.90    3.60
  -4   7  -2   31.10    4.50
   4   7   2   24.80    4.40
   4   7   2   33.20    4.20
  -5  -7  -2   17.90    3.20
   5  -7   2   17.30    3.00
   5   7   2   23.00    4.90
   5   7   2   22.30    3.90
  -5   7  -2   17.80    4.10
   6  -7   2    9.20    2.80
  -6  -7  -2   10.80    2.90
  -6   7  -2   14.60    4.10
   6   7   2    7.30    4.10
   6   7   2    8.30    3.70
  -5  -8   2    6.10    3.90
   5  -8  -2    1.30    2.90
   5   8  -2   -0.20    3.00
  -4  -8   2    6.90    3.50
   4  -8  -2    0.00    2.70
   4   8  -2   -1.80    2.80
   3  -8  -2    7.50    2.90
  -3  -8   2    7.10    3.40
   3   8  -2    6.60    3.10
  -3   8   2    4.70    3.10
   2  -8  -2   61.79    5.20
  -2  -8   2   70.99    5.90
  -2   8   2   56.19    5.40
   2   8  -2   61.59    5.40
   1  -8  -2   12.70    2.80
  -1  -8   2    9.10    3.10
  -1   8   2    8.10    2.80
   1   8  -2   11.90    3.20
   0  -8  -2   28.50    3.60
   0  -8   2   29.70    4.20
   0   8   2   29.60    4.20
   0   8  -2   27.70    3.70
   1  -8   2   11.10    2.70
  -1  -8  -2    8.60    2.50
   1   8   2    7.80    3.30
  -1   8  -2    8.90    3.00
   2  -8   2    3.30    2.10
  -2  -8  -2   -0.90    1.90
   2   8   2    0.20    2.80
  -2   8  -2    1.50    2.60
  -3  -8  -2    4.40    2.40
   3  -8   2    3.00    2.40
   3   8   2    5.50    3.60
  -3   8  -2    4.40    3.00
  -4  -8  -2    5.70    2.60
   4  -8   2    3.40    2.60
   4   8   2    3.40    3.70
  -4   8  -2    5.30    3.20
  -2  -9   2    8.40    3.70
   2  -9  -2    6.80    2.70
  -1  -9   2   -5.10    2.70
  -2   9  -2    1.70    2.80
   2   9   2   -0.90    3.00
  10   0  -3   10.00    3.60
 -10   0   3   11.40    4.10
  -9   0   3   11.90    3.40
   9   0  -3   16.00    3.40
  -8   0   3    8.00    2.70
   8   0  -3    7.40    2.40
  -7   0   3  111.79    5.40
   7   0  -3  101.39    5.20
   6   0  -3    0.60    1.20
   6   0  -3   -0.60    1.50
  -6   0   3   -0.20    1.50
   5   0  -3    1.90    1.10
   5   0  -3    0.80    1.30
  -5   0   3   -0.30    1.40
  -5   0   3    1.10    1.00
   4   0  -3   88.99    3.50
   4   0  -3   85.69    3.00
  -4   0   3   77.39    3.40
  -4   0   3   87.09    2.90
  -3   0   3   23.40    1.70
  -3   0   3   20.70    1.80
   3   0  -3   16.80    1.70
   3   0  -3   16.20    1.40
  -2   0   3   84.39    2.70
  -2   0   3   84.69    2.50
   2   0  -3   87.19    2.50
   2   0  -3   86.49    2.70
  -1   0   3  173.48    3.60
  -1   0   3  172.08    3.60
   1   0  -3  170.38    3.60
   0   0  -3    4.90    0.80
   0   0  -3    5.00    0.80
   0   0   3    4.10    0.80
   0   0   3    4.40    0.80
   1   0   3 9863.51  169.98
  -1   0  -3 9848.11  170.38
   1   0   3 9999.00  169.88
  -1   0  -3 9740.12  170.28
   2   0   3   71.29    2.40
  -2   0  -3   73.19    2.50
   2   0   3   69.29    2.50
  -2   0  -3   69.29    2.50
   3   0   3  159.48    4.40
  -3   0  -3  148.49    4.20
  -3   0  -3  160.38    4.30
   3   0   3  159.68    4.30
   4   0   3   81.09    3.20
  -4   0  -3   79.69    3.40
   4   0   3   81.89    3.30
  -4   0  -3   83.49    3.30
   5   0   3    3.60    1.40
   5   0   3    7.90    1.60
  -5   0  -3    8.00    1.80
  -5   0  -3    6.00    1.60
  -6   0  -3   37.90    3.20
   6   0   3   43.30    3.50
   7   0   3   36.50    3.50
  -7   0  -3   49.10    4.20
  -8   0  -3   14.30    3.10
   8   0   3   12.10    3.00
   9   0   3   -2.40    2.30
  -9   0  -3   -0.20    2.10
   9  -1  -3   54.59    5.10
  -9  -1   3   53.09    5.00
  -9   1   3   59.09    5.40
   9   1  -3   61.19    5.50
   8  -1  -3   35.80    3.80
  -8  -1   3   51.09    4.40
  -8   1   3   61.39    5.20
   8   1  -3   58.29    5.20
   7  -1  -3   87.99    4.70
  -7  -1   3   85.49    4.80
   7  -1  -3   82.09    5.10
   7   1  -3   82.49    4.80
  -7   1   3   78.09    4.90
   6  -1  -3   67.49    3.60
   6  -1  -3   75.99    3.90
  -6  -1   3   64.19    3.90
  -6  -1   3   64.19    3.60
   6   1  -3   63.29    4.10
  -6   1   3   61.79    3.90
  -5  -1   3  363.06    8.40
   5  -1  -3  373.36    8.60
  -5  -1   3  347.07    8.50
   5  -1  -3  348.17    8.50
   5   1  -3  351.56    7.20
  -5   1   3  340.77    8.90
   5   1  -3  345.57    8.90
   4  -1  -3  125.89    4.00
  -4  -1   3  128.29    4.20
   4  -1  -3  120.19    4.20
  -4  -1   3  129.29    4.20
   4   1  -3  123.29    4.40
   4   1  -3  125.09    3.10
  -4   1   3  122.89    2.90
  -4   1   3  123.09    4.40
  -3  -1   3 1473.65   27.40
   3  -1  -3 1532.15   27.10
  -3  -1   3 1515.35   27.20
   3  -1  -3 1493.25   27.50
  -3   1   3 1503.15   27.60
   3   1  -3 1512.95   27.60
  -3   1   3 1542.05   26.20
   3   1  -3 1531.65   26.30
  -2  -1   3  411.56    8.50
   2  -1  -3  407.96    8.00
   2  -1  -3  410.26    8.50
  -2  -1   3  418.46    8.00
  -2   1   3  415.06    7.50
   2   1  -3  414.76    8.60
   2   1  -3  414.66    7.50
  -2   1   3  405.96    8.50
   1  -1  -3 6021.20  104.49
  -1  -1   3 5771.62  103.59
  -1  -1   3 6115.09  105.49
   1  -1  -3 5929.21  103.69
   1   1  -3 6089.59  104.99
   1   1  -3 6128.09  104.39
  -1   1   3 6029.30  104.29
  -1   1   3 6045.00  104.49
   0  -1  -3  318.87    6.20
   0  -1   3  328.27    6.30
   0   1   3  328.87    6.60
   0   1  -3  323.77    6.50
   0   1  -3  318.97    6.40
   0   1   3  318.37    5.80
   0   1   3  323.57    6.50
   0   1  -3  310.47    5.80
   1  -1   3  633.14   11.30
   1  -1   3  628.14   11.80
  -1  -1  -3  644.54   11.90
  -1  -1  -3  632.94   11.20
  -1   1  -3  646.44   11.50
   1   1   3  634.04   12.30
  -1   1  -3  633.44   12.10
   1   1   3  643.54   11.50
   2  -1   3   99.49    2.40
  -2  -1  -3   99.59    2.40
  -2  -1  -3  102.29    3.10
   2  -1   3  102.49    3.10
   2   1   3   94.49    3.00
   2   1   3   97.59    3.60
  -2   1  -3  102.29    3.60
  -2   1  -3  102.29    2.90
  -3  -1  -3   67.89    2.90
   3  -1   3   70.19    2.90
  -3  -1  -3   70.99    2.20
   3  -1   3   68.79    2.20
   3   1   3   63.89    2.80
   3   1   3   73.09    3.30
  -3   1  -3   66.89    2.80
  -3   1  -3   72.49    3.40
  -4  -1  -3   45.50    2.60
  -4  -1  -3   46.00    2.10
   4  -1   3   42.70    2.60
   4  -1   3   39.80    2.00
   4   1   3   38.60    3.10
  -4   1  -3   43.70    2.70
   4   1   3   44.50    2.70
  -4   1  -3   35.50    2.80
  -5  -1  -3  209.68    6.20
   5  -1   3  206.28    6.10
  -5   1  -3  209.48    6.30
   5   1   3  199.68    6.20
   5   1   3  212.88    6.60
  -5   1  -3  213.18    6.50
   6  -1   3   28.60    3.00
  -6  -1  -3   30.50    3.10
   6   1   3   27.20    3.00
   6   1   3   34.20    3.30
  -6   1  -3   29.50    3.00
  -6   1  -3   30.70    3.10
  -7  -1  -3   36.30    3.60
   7  -1   3   38.90    3.70
  -7   1  -3   41.80    4.00
   7   1   3   37.90    3.60
   8  -1   3    3.60    2.60
  -8  -1  -3   10.60    2.80
  -8   1  -3    8.50    2.80
   8   1   3    3.60    2.50
   9  -1   3   38.20    4.70
  -9  -1  -3   33.30    4.30
   9   1   3   42.90    4.80
  -9   1  -3   36.00    4.50
  -9  -2   3    8.70    2.90
   9  -2  -3    4.70    2.70
  -9   2   3    7.50    3.00
   9   2  -3    7.50    3.10
   8  -2  -3   12.50    2.80
  -8  -2   3   12.10    2.90
   8   2  -3   11.40    3.00
  -8   2   3   11.40    3.10
   7  -2  -3  205.88    6.90
   7  -2  -3  184.08    6.70
  -7  -2   3  191.48    6.80
  -7  -2   3  179.28    6.60
  -7   2   3  182.68    7.40
   7   2  -3  192.18    7.40
   6  -2  -3   94.39    4.70
   6  -2  -3   90.49    4.30
  -6  -2   3   96.09    4.70
  -6  -2   3   95.29    4.50
  -6   2   3   92.19    4.80
   6   2  -3   94.29    5.00
  -5  -2   3  103.79    4.70
  -5  -2   3  103.99    4.00
   5  -2  -3  112.19    4.10
   5   2  -3   91.69    4.40
  -5   2   3   98.89    4.60
   4  -2  -3    9.60    1.60
  -4  -2   3    9.80    1.60
  -4   2   3    5.00    1.80
  -4   2   3    7.90    1.90
   4   2  -3   10.80    2.00
  -3  -2   3   88.29    3.10
   3  -2  -3   85.19    2.90
  -3   2   3   87.19    2.20
   3   2  -3   88.79    2.00
   3   2  -3   85.09    4.10
  -3   2   3   82.09    3.80
  -3   2   3   85.39    3.60
   3   2  -3   80.49    3.50
  -2  -2   3    2.10    0.90
   2  -2  -3    2.40    0.90
  -2   2   3    2.80    1.50
  -2   2   3    6.10    1.60
   2   2  -3   -0.10    1.50
   2   2  -3    3.90    0.80
  -2   2   3    4.00    0.90
   2   2  -3    1.60    1.30
   1  -2  -3  666.43   12.00
  -1  -2   3  646.74   12.90
  -1  -2   3  646.24   12.00
  -1   2   3  656.13   13.00
  -1   2   3  656.43   12.50
   1   2  -3  658.13   13.00
   1   2  -3  670.93   12.30
   0  -2  -3  158.78    4.00
   0  -2   3  162.98    4.10
   0   2   3  158.78    3.80
   0   2  -3  159.88    4.40
   0   2  -3  163.38    4.50
   0   2   3  161.88    4.40
   0   2   3  165.98    4.60
   0   2  -3  161.08    3.80
   1  -2   3  506.75    9.40
  -1  -2  -3  500.05    9.30
   1  -2   3  508.25   10.10
  -1  -2  -3  504.45   10.10
   1   2   3  507.35    9.80
  -1   2  -3  489.85    9.70
   1   2   3  505.45   10.80
  -1   2  -3  494.75   10.50
   2  -2   3   31.90    1.20
  -2  -2  -3   38.60    2.30
  -2  -2  -3   31.90    1.00
   2  -2   3   34.20    2.30
  -2   2  -3   34.40    2.70
   2   2   3   28.50    2.10
  -2   2  -3   31.40    2.00
   2   2   3   31.30    2.80
   3  -2   3  975.50   18.60
  -3  -2  -3  966.50   18.60
   3   2   3  995.70   19.80
   3   2   3  966.60   18.60
  -3   2  -3  984.10   19.50
  -3   2  -3  954.90   18.60
   4  -2   3   30.20    2.50
  -4  -2  -3   25.40    2.30
  -4   2  -3   28.10    2.40
  -4   2  -3   25.60    2.80
   4   2   3   25.10    2.30
   4   2   3   33.70    3.20
   5  -2   3   49.99    3.30
  -5  -2  -3   45.50    3.00
  -5   2  -3   51.69    3.40
  -5   2  -3   51.09    3.80
   5   2   3   43.60    3.40
   5   2   3   52.89    4.00
  -6  -2  -3   58.89    3.70
   6  -2   3   53.39    3.50
  -6   2  -3   55.39    4.20
  -6   2  -3   55.79    4.00
   6   2   3   64.39    4.50
   6   2   3   62.49    4.10
  -7  -2  -3   52.49    4.40
   7  -2   3   42.30    3.90
   7   2   3   41.00    4.20
   7   2   3   47.60    4.40
  -7   2  -3   41.70    4.10
  -7   2  -3   46.20    4.30
   8  -2   3   29.10    3.70
  -8  -2  -3   23.30    3.50
  -8   2  -3   30.30    4.10
   8   2   3   36.00    4.20
  -9  -2  -3   28.30    3.90
   9  -2   3   33.20    4.30
   9   2   3   37.10    4.70
  -9   2  -3   28.20    4.10
  -9  -3   3    9.70    3.20
   9  -3  -3    6.20    2.80
  -9   3   3    8.30    3.20
   9   3  -3    8.00    3.40
   8  -3  -3   89.99    5.50
  -8  -3   3   76.29    5.10
   8  -3  -3   77.79    4.90
   8   3  -3   83.89    6.10
  -8   3   3   84.29    6.00
   7  -3  -3    8.90    2.50
  -7  -3   3    6.50    2.40
  -7  -3   3    7.50    2.60
   7  -3  -3    7.30    2.30
   7   3  -3    2.10    2.40
  -7   3   3    8.80    2.90
   6  -3  -3   57.89    3.60
  -6  -3   3   55.79    4.30
   6  -3  -3   69.89    4.50
  -6  -3   3   59.19    3.90
   6   3  -3   49.80    4.30
  -6   3   3   46.70    4.10
   5  -3  -3   33.70    2.80
  -5  -3   3   34.10    2.80
   5   3  -3   44.50    3.90
  -5   3   3   39.10    3.80
  -5   3   3   36.50    3.60
   4  -3  -3  213.58    5.80
  -4  -3   3  210.08    5.80
  -4   3   3  209.28    7.00
  -4   3   3  209.38    6.70
   4   3  -3  214.98    7.20
   4   3  -3  205.98    6.70
   3  -3  -3   75.49    2.90
  -3  -3   3   71.79    2.90
  -3   3   3   72.59    4.00
   3   3  -3   75.59    4.30
   3   3  -3   71.49    3.80
  -3   3   3   69.79    2.30
  -3   3   3   74.69    3.70
   3   3  -3   67.29    2.00
  -2  -3   3  311.67    6.80
   2  -3  -3  311.97    6.70
  -2   3   3  298.47    7.70
  -2   3   3  302.27    6.80
   2   3  -3  310.47    6.50
   2   3  -3  314.57    8.30
  -2   3   3  292.07    7.90
   2   3  -3  300.17    7.80
  -1  -3   3   50.39    2.20
   1  -3  -3   56.49    2.30
   1   3  -3   51.89    2.50
  -1   3   3   52.89    3.10
   1   3  -3   46.90    3.00
   1   3  -3   51.19    3.30
  -1   3   3   51.09    2.90
  -1   3   3   54.59    2.80
   0  -3  -3  432.66    8.90
   0  -3   3  426.16    9.20
   0   3  -3  428.26    9.50
   0   3   3  406.16    9.60
   0   3   3  430.26    8.80
   0   3  -3  421.66    9.40
   0   3   3  429.96    9.60
   0   3  -3  424.76    8.80
   1  -3   3  111.59    3.30
  -1  -3  -3  108.49    3.10
  -1  -3  -3  111.59    3.80
  -1   3  -3  108.49    4.30
   1   3   3  113.39    4.60
  -1   3  -3  111.19    3.60
   1   3   3  109.09    3.60
   2  -3   3  388.86    8.70
   2  -3   3  380.16    7.60
  -2  -3  -3  393.26    8.80
  -2  -3  -3  385.86    7.30
  -2   3  -3  388.96    9.60
   2   3   3  383.96    8.70
   2   3   3  374.36    9.80
  -2   3  -3  386.66    8.60
  -3  -3  -3  152.08    4.80
   3  -3   3  149.88    4.70
   3  -3   3  149.09    3.00
  -3   3  -3  148.39    5.70
   3   3   3  140.79    5.70
   3   3   3  149.79    4.90
  -3   3  -3  141.19    4.80
   4  -3   3  266.77    7.10
  -4  -3  -3  261.87    7.20
  -4   3  -3  272.77    7.50
   4   3   3  258.17    8.50
  -4   3  -3  285.47    8.40
   4   3   3  280.67    7.60
   5  -3   3    6.70    1.90
  -5  -3  -3    8.40    2.10
   5   3   3   10.60    2.40
   5   3   3    5.10    2.60
  -5   3  -3   10.90    2.60
  -5   3  -3    7.50    2.00
   6  -3   3    7.40    2.20
  -6  -3  -3    7.50    2.20
   6   3   3   10.00    2.50
  -6   3  -3    7.70    2.40
  -6   3  -3    7.80    2.80
   6   3   3   13.20    3.00
  -7  -3  -3    4.80    2.20
   7  -3   3    5.90    2.40
  -7   3  -3    3.30    2.20
   7   3   3   -2.30    2.00
   7   3   3    0.20    2.50
  -7   3  -3    1.10    2.40
  -8  -3  -3   36.40    4.30
   8  -3   3   26.40    3.70
   8   3   3   28.50    4.10
  -8   3  -3   35.30    4.20
  -8   3  -3   30.10    4.10
  -9  -3  -3   27.20    4.00
   9  -3   3   37.20    4.40
  -9   3  -3   34.10    4.70
   9   3   3   36.90    4.90
  -9  -4   3    1.90    2.70
   9  -4  -3    6.50    2.80
   9  -4  -3    4.10    2.60
   9   4  -3   -1.30    3.00
  -9   4   3    1.60    2.80
  -8  -4   3    3.90    2.80
  -8  -4   3    3.60    2.50
   8  -4  -3    8.10    2.90
   8  -4  -3   11.70    2.80
   8   4  -3   10.90    3.20
  -8   4   3    9.20    3.20
  -7  -4   3   -0.70    2.00
  -7  -4   3    2.20    2.60
   7  -4  -3    0.60    1.90
   7  -4  -3    0.20    2.40
  -7   4   3    4.90    2.70
   7   4  -3    1.40    2.80
  -6  -4   3   23.90    3.50
   6  -4  -3   29.70    3.00
  -6  -4   3   21.70    2.70
  -6   4   3   23.10    3.60
   6   4  -3   16.50    3.10
   5  -4  -3    8.10    1.80
  -5  -4   3    8.40    2.00
  -5   4   3   10.00    2.70
   5   4  -3    4.10    2.30
  -5   4   3    8.50    2.70
  -4  -4   3   82.79    3.60
   4  -4  -3   73.59    3.30
  -4   4   3   73.19    4.70
  -4   4   3   68.59    4.40
   4   4  -3   75.69    4.30
   4   4  -3   71.09    5.10
   3  -4  -3    3.40    1.30
  -3  -4   3    2.90    1.30
   3   4  -3    0.60    2.00
   3   4  -3    1.40    1.80
  -3   4   3    3.60    2.00
  -3   4   3    2.90    1.90
   2  -4  -3    9.70    1.40
  -2  -4   3   10.00    1.50
   2   4  -3   12.20    1.50
  -2   4   3   10.60    1.70
   2   4  -3    9.90    2.20
  -2   4   3   11.10    2.10
   2   4  -3    7.30    2.00
  -2   4   3    7.90    2.00
   1  -4  -3    1.90    1.10
  -1  -4   3    3.90    1.20
   1   4  -3    2.70    1.40
  -1   4   3    1.40    1.50
  -1   4   3    4.60    1.70
  -1   4   3    5.90    1.80
   1   4  -3    5.30    1.90
   1   4  -3    1.50    1.60
   0   4  -3   90.39    3.50
   0   4   3   83.19    4.20
   0   4  -3   90.39    4.10
   0   4   3   91.79    4.10
   0   4   3   99.19    3.70
   0   4  -3   87.89    4.10
  -1  -4  -3   -0.40    0.90
   1  -4   3   -0.10    1.10
  -1  -4  -3    1.70    1.20
  -1   4  -3    1.70    1.60
  -1   4  -3    1.60    1.70
   1   4   3    0.50    1.30
  -1   4  -3    3.80    1.40
   1   4   3    0.50    1.80
   2  -4   3  211.78    6.10
  -2  -4  -3  215.38    4.90
   2  -4   3  210.08    5.20
  -2  -4  -3  217.58    6.20
   2   4   3  213.78    7.50
  -2   4  -3  218.68    6.20
  -2   4  -3  214.98    7.10
   2   4   3  223.68    6.30
   3  -4   3   11.60    1.90
  -3  -4  -3   17.50    2.30
  -3   4  -3   15.90    2.70
  -3   4  -3   18.10    2.30
   3   4   3   19.20    3.20
   3   4   3   13.10    2.10
  -4  -4  -3   42.40    3.30
   4  -4   3   45.30    3.40
   4   4   3   44.10    3.60
  -4   4  -3   39.40    3.40
  -4   4  -3   51.39    4.30
   4   4   3   56.29    4.90
  -5  -4  -3    4.00    1.80
   5  -4   3    3.80    1.80
  -5   4  -3    6.30    2.20
  -5   4  -3    1.90    2.30
   5   4   3    4.70    2.30
   5   4   3    1.40    2.60
  -6  -4  -3   16.50    2.60
   6  -4   3   18.10    2.60
   6   4   3   18.10    3.20
  -6   4  -3   16.70    3.30
  -6   4  -3   24.10    3.30
   6   4   3   21.80    3.90
   7  -4   3    2.00    2.30
  -7  -4  -3    3.20    2.60
   7   4   3    4.60    2.80
  -7   4  -3    3.10    2.90
   7   4   3    2.50    3.10
  -7   4  -3    2.40    2.40
  -8  -4  -3    8.50    3.10
   8  -4   3    4.20    2.60
  -8   4  -3    6.30    3.30
   8   4   3    7.60    3.60
  -8   4  -3    3.50    2.80
   8   4   3    0.00    2.70
  -8  -5   3    6.50    3.10
   8  -5  -3    3.90    2.80
   8  -5  -3    6.50    2.70
  -8  -5   3    8.00    3.00
  -8   5   3    3.80    3.00
   8   5  -3   11.00    3.80
   7  -5  -3    5.10    2.30
  -7  -5   3    8.70    3.40
  -7  -5   3   14.50    2.90
   7  -5  -3    5.30    2.70
   7   5  -3   10.40    3.50
  -7   5   3   10.60    3.50
   6  -5  -3  190.68    6.80
   6  -5  -3  185.28    8.00
  -6  -5   3  207.18    8.40
  -6  -5   3  190.48    7.00
   6   5  -3  209.78    8.60
  -6   5   3  195.98    8.10
  -5  -5   3    1.80    1.70
   5  -5  -3    3.70    1.70
  -5   5   3    3.40    2.50
   5   5  -3    2.10    2.40
  -4  -5   3   79.39    3.90
   4  -5  -3   72.89    3.70
  -4   5   3   80.29    5.10
   4   5  -3   76.39    4.90
  -4   5   3   74.39    5.10
   3  -5  -3   15.40    1.90
  -3  -5   3   14.60    2.00
  -3   5   3   14.50    2.70
  -3   5   3   10.80    2.60
   3   5  -3   16.50    3.30
   3   5  -3   15.40    2.80
   2  -5  -3   96.89    3.80
  -2  -5   3   96.79    3.80
   2   5  -3   97.69    5.00
  -2   5   3  103.19    5.20
  -2   5   3   92.89    4.90
   2   5  -3   99.19    5.50
  -2   5   3  106.29    4.40
  -1  -5   3    6.40    1.50
   1  -5  -3    7.00    1.50
   1   5  -3    5.30    1.90
  -1   5   3    3.10    1.80
  -1   5   3    1.40    1.90
  -1   5   3    5.50    2.00
   1   5  -3    5.40    1.70
   0  -5  -3  186.18    5.70
   0  -5   3  164.48    5.70
   0   5  -3  176.58    6.20
   0   5   3  178.68    5.70
   0   5  -3  180.78    6.20
   0   5   3  174.88    6.20
   0   5   3  174.88    6.50
   0   5  -3  174.68    5.50
  -1  -5  -3   15.40    2.30
   1  -5   3   12.10    1.90
  -1  -5  -3    8.80    1.60
  -1   5  -3    5.90    2.10
   1   5   3   10.60    2.60
  -1   5  -3   10.10    2.00
   1   5   3    8.70    1.90
  -2  -5  -3  242.38    7.10
   2  -5   3  240.38    6.20
   2  -5   3  241.18    7.00
  -2   5  -3  244.88    7.20
   2   5   3  231.18    7.20
  -2   5  -3  234.58    8.00
   2   5   3  235.38    8.30
  -3  -5  -3    6.90    2.00
   3  -5   3    7.70    1.90
   3   5   3    6.20    2.80
   3   5   3    7.10    2.10
  -3   5  -3   11.40    2.80
  -3   5  -3    6.90    2.10
   4  -5   3  123.29    5.30
  -4  -5  -3  129.99    5.40
  -4   5  -3  124.99    5.70
   4   5   3  136.39    7.10
  -4   5  -3  131.19    6.70
   4   5   3  129.59    5.70
   5  -5   3    6.80    2.20
  -5  -5  -3    7.00    2.10
  -5   5  -3    7.00    2.40
   5   5   3   10.20    3.30
  -5   5  -3    8.60    3.20
   5   5   3    5.10    2.50
  -6  -5  -3   45.80    4.00
   6  -5   3   47.80    4.20
   6   5   3   50.49    5.70
  -6   5  -3   43.50    4.50
   6   5   3   44.80    4.60
  -6   5  -3   52.69    5.30
  -7  -5  -3    6.50    2.90
   7  -5   3    9.10    3.00
   7   5   3    6.40    3.80
   7   5   3    2.90    2.80
  -7   5  -3    7.80    3.00
  -7   5  -3   10.80    3.60
  -8  -5  -3    9.60    2.90
   8  -5   3    9.50    3.00
  -8   5  -3   14.90    3.90
   8   5   3    8.00    3.90
   8   5   3   21.10    4.30
  -8   5  -3   16.90    3.70
   7  -6  -3   14.00    3.30
  -7  -6   3   13.60    3.80
  -7  -6   3   15.70    3.20
  -7   6   3   14.60    3.80
   7   6  -3   13.80    3.90
   6  -6  -3   29.10    4.10
   6  -6  -3   24.50    3.10
  -6  -6   3   19.00    4.00
  -6  -6   3   22.50    3.10
   6   6  -3   21.60    4.30
  -6   6   3   20.40    3.90
   5  -6  -3   18.20    2.60
  -5  -6   3   18.30    2.70
  -5  -6   3   15.50    3.40
   5   6  -3   15.00    3.70
  -5   6   3   14.10    3.40
   4  -6  -3   62.69    3.70
  -4  -6   3   50.79    3.60
   4   6  -3   63.89    5.30
  -4   6   3   65.09    5.30
  -3  -6   3    5.10    1.70
   3  -6  -3    5.20    1.70
   3   6  -3    7.20    2.80
  -3   6   3    7.30    2.80
  -2  -6   3    2.90    1.60
   2  -6  -3    2.20    1.40
  -2   6   3    1.40    2.30
   2   6  -3    4.40    2.40
  -1  -6   3   38.30    3.00
   1  -6  -3   42.10    3.10
  -1  -6   3   39.30    3.90
   1   6  -3   38.40    3.40
  -1   6   3   42.50    4.00
   1   6  -3   37.90    3.70
  -1   6   3   38.60    3.70
   0  -6   3   37.30    3.40
   0  -6  -3   41.80    3.30
   0   6  -3   37.00    3.50
   0   6   3   39.60    3.90
   0   6  -3   37.30    3.70
   0   6   3   39.50    3.70
   0   6   3   35.90    3.10
   0   6  -3   39.80    3.30
  -1  -6  -3   29.70    3.10
  -1  -6  -3   25.80    2.80
   1  -6   3   28.90    2.80
  -1   6  -3   30.20    3.60
  -1   6  -3   26.00    2.90
   1   6   3   23.70    3.60
   1   6   3   29.40    3.00
   2  -6   3   97.79    4.70
  -2  -6  -3   85.29    4.50
  -2   6  -3   92.49    5.60
  -2   6  -3   78.59    4.60
   2   6   3   96.29    6.10
   2   6   3   97.19    5.00
   3  -6   3    7.30    2.10
  -3  -6  -3    9.40    2.30
   3   6   3    8.80    3.00
   3   6   3    7.70    2.40
  -3   6  -3    6.50    2.40
  -3   6  -3    3.80    2.60
  -4  -6  -3   23.30    3.10
   4  -6   3   22.40    2.90
  -4   6  -3   21.90    4.00
  -4   6  -3   25.20    3.40
   4   6   3   27.50    3.50
   4   6   3   21.10    4.20
  -5  -6  -3    9.10    2.70
   5  -6   3   11.60    2.70
   5   6   3   16.90    4.40
  -5   6  -3   11.40    2.90
  -5   6  -3   12.80    3.50
   5   6   3    5.60    2.70
   6  -6   3   59.19    4.80
  -6  -6  -3   45.90    4.40
   6   6   3   51.39    5.00
   6   6   3   44.60    5.80
  -6   6  -3   46.10    4.70
  -6   6  -3   67.29    6.40
  -7  -6  -3    6.20    2.90
   7  -6   3    5.20    2.60
   7   6   3   -1.20    2.60
  -7   6  -3    1.40    3.10
   7   6   3    1.20    3.70
  -7   6  -3    3.90    4.20
  -6  -7   3   63.29    6.10
   6  -7  -3   68.89    6.10
  -6   7   3   71.19    6.30
   6   7  -3   58.39    6.10
  -5  -7   3   41.70    5.10
   5  -7  -3   48.90    5.30
  -5   7   3   36.70    5.00
   5   7  -3   43.20    5.10
  -4  -7   3    7.80    3.40
   4  -7  -3    4.70    2.70
   4   7  -3    5.90    3.30
  -4   7   3   13.60    3.50
  -3  -7   3   70.89    5.90
   3  -7  -3   58.59    5.10
   3   7  -3   65.59    5.50
  -3   7   3   71.39    5.80
  -2  -7   3   35.70    4.10
   2  -7  -3   45.70    4.30
   2   7  -3   51.89    4.80
  -2   7   3   45.50    4.70
   1  -7  -3   30.60    3.40
  -1  -7   3   32.60    3.80
   1   7  -3   33.90    4.00
  -1   7   3   37.80    4.10
   0  -7   3   60.89    4.50
   0  -7  -3   62.49    4.00
   0   7  -3   63.79    4.60
   0   7   3   65.09    5.10
   0   7  -3   55.79    4.50
   1  -7   3  177.18    6.90
  -1  -7  -3  181.08    6.80
   1   7   3  178.98    8.10
  -1   7  -3  188.58    7.80
  -2  -7  -3   36.90    3.70
   2  -7   3   36.00    3.60
   2   7   3   48.70    5.30
  -2   7  -3   38.60    4.50
  -3  -7  -3  111.09    5.50
   3  -7   3  105.39    5.50
  -3   7  -3  108.19    6.80
   3   7   3  107.69    7.30
  -4  -7  -3    3.00    2.30
   4  -7   3    2.00    2.20
  -4   7  -3    6.30    3.20
   4   7   3    8.60    3.90
   5  -7   3   28.50    3.50
  -5  -7  -3   18.90    3.10
   5   7   3   23.30    5.00
  -5   7  -3   20.00    4.10
  -6  -7  -3    0.40    2.50
   6  -7   3    0.80    2.30
  -6   7  -3   -1.40    3.20
   6   7   3    5.70    4.00
  -5  -8   3   23.50    4.80
   5  -8  -3   17.90    3.90
  -5   8   3   23.10    4.30
   5   8  -3   19.30    4.40
  -4  -8   3   -3.10    3.00
   4  -8  -3    0.90    2.80
   4   8  -3    0.00    3.00
  -4   8   3   -2.30    2.60
  -3  -8   3   22.20    4.30
   3  -8  -3   21.40    3.60
  -3   8   3   16.30    3.80
   3   8  -3   19.40    4.00
   2  -8  -3    4.60    2.60
  -2  -8   3    2.70    3.20
  -2   8   3   -1.50    2.50
   2   8  -3    7.80    3.10
  -1  -8   3   36.30    4.20
   1  -8  -3   46.20    4.30
  -1   8   3   37.60    4.40
   1   8  -3   46.90    4.80
   0  -8   3   17.00    4.70
   0  -8  -3   15.30    2.80
   0   8  -3   14.20    3.20
   0   8   3    6.60    3.00
   1  -8   3   69.69    5.10
  -1  -8  -3   70.39    4.80
   1   8   3   66.69    6.20
  -1   8  -3   67.49    5.60
   2  -8   3    0.50    2.10
  -2  -8  -3    0.30    2.10
   2   8   3    0.80    3.00
  -2   8  -3   -2.00    2.40
  -3  -8  -3    6.00    2.40
   3  -8   3    5.30    2.50
  -3   8  -3    0.50    2.80
   3   8   3    1.50    3.20
  -4  -8  -3    9.90    2.90
   4  -8   3    4.60    2.50
   4   8   3    2.00    3.60
  -4   8  -3    3.50    3.30
  -2  -9   3    0.60    3.10
   2  -9  -3    1.90    2.30
  -1  -9   3   25.70    4.20
   1   9   3  166.98    9.00
   2   9   3    2.60    3.10
  -2   9  -3    1.50    2.70
 -10   0   4    0.50    3.00
  10   0  -4   -2.00    2.90
   9   0  -4   -1.10    2.60
  -9   0   4   -4.10    2.20
  -8   0   4  139.09    6.50
   8   0  -4  125.09    6.30
   7   0  -4    0.70    2.00
  -7   0   4    0.70    2.00
   6   0  -4  184.18    6.20
  -6   0   4  177.28    6.20
   6   0  -4  185.18    5.30
   5   0  -4   -0.20    1.40
   5   0  -4   -0.70    1.00
  -5   0   4    0.40    1.00
  -5   0   4    1.80    1.50
  -4   0   4  739.13   14.10
   4   0  -4  749.03   14.90
  -4   0   4  754.62   14.90
   4   0  -4  734.43   14.20
   3   0  -4   -0.20    1.00
   3   0  -4    0.10    0.90
  -3   0   4    0.10    0.80
  -3   0   4    0.80    1.10
  -2   0   4 1407.46   24.40
  -2   0   4 1361.96   24.60
   2   0  -4 1387.66   24.40
   2   0  -4 1372.76   24.50
  -1   0   4   -1.80    0.70
   1   0  -4   -1.10    0.60
  -1   0   4   -1.80    0.70
   1   0  -4   -2.30    0.70
   0   0  -4  697.73   12.40
   0   0   4  684.93   12.30
   0   0  -4  698.23   12.30
   0   0   4  706.93   12.50
   1   0   4    1.50    0.70
   1   0   4   -0.10    0.80
  -1   0  -4    0.10    0.70
  -1   0  -4    0.30    0.70
   2   0   4 1337.27   23.80
   2   0   4 1336.57   23.70
  -2   0  -4 1308.67   23.70
   3   0   4   19.00    1.80
   3   0   4   16.80    1.70
  -3   0  -4   15.60    1.70
  -3   0  -4   16.30    1.60
   4   0   4  442.06    9.50
   4   0   4  429.46    9.40
  -4   0  -4  420.86    9.40
  -4   0  -4  431.96    9.40
  -5   0  -4   28.30    2.70
  -5   0  -4   19.30    2.20
   5   0   4   23.90    2.40
   5   0   4   22.30    2.30
  -6   0  -4   34.50    3.20
   6   0   4   25.50    2.80
   7   0   4   24.90    2.90
  -7   0  -4   29.10    3.40
   8   0   4   29.60    3.70
  -8   0  -4   35.10    4.10
  -9   0  -4   14.10    3.20
   9   0   4   10.70    3.30
  -9  -1   4   17.30    3.60
   9  -1  -4   13.10    3.30
  -9   1   4   16.20    3.50
   9   1  -4   11.20    3.40
  -8  -1   4   29.20    3.80
   8  -1  -4   31.80    3.70
   8   1  -4   26.40    3.70
  -8   1   4   25.50    3.50
  -7  -1   4   15.20    2.70
   7  -1  -4   14.40    2.30
   7  -1  -4   13.70    2.60
  -7   1   4   15.70    3.00
   7   1  -4   14.50    2.70
  -6  -1   4   46.90    3.30
   6  -1  -4   47.20    3.20
  -6  -1   4   49.70    3.20
   6  -1  -4   44.80    3.10
   6   1  -4   52.69    4.10
  -6   1   4   49.40    3.90
  -5  -1   4    0.70    1.40
   5  -1  -4   -0.20    1.10
   5  -1  -4    3.80    1.50
  -5  -1   4    3.20    1.50
   5   1  -4    1.50    0.80
  -5   1   4    1.50    1.50
   5   1  -4    0.00    1.60
  -4  -1   4   69.39    3.00
   4  -1  -4   63.39    2.90
  -4  -1   4   59.19    3.00
   4  -1  -4   59.99    3.00
   4   1  -4   64.59    2.10
  -4   1   4   66.59    2.00
   4   1  -4   70.39    3.40
  -4   1   4   64.59    3.40
   3  -1  -4   18.60    1.80
   3  -1  -4   21.40    1.70
  -3  -1   4   17.80    1.80
  -3  -1   4   17.20    1.60
  -3   1   4   21.50    1.20
   3   1  -4   22.20    1.20
  -3   1   4   22.20    2.00
   3   1  -4   21.20    2.00
  -2  -1   4   70.69    2.80
  -2  -1   4   75.29    2.30
   2  -1  -4   70.79    2.70
   2  -1  -4   71.79    2.20
  -2   1   4   74.09    2.10
   2   1  -4   77.29    3.00
   2   1  -4   77.29    2.00
  -2   1   4   74.39    3.00
  -1  -1   4  166.08    3.30
   1  -1  -4  168.78    4.00
   1  -1  -4  164.78    3.30
  -1   1   4  165.98    4.10
  -1   1   4  167.38    3.70
   1   1  -4  166.78    4.20
   1   1  -4  162.28    3.60
   0  -1   4 2164.68   37.40
   0  -1  -4 2135.89   37.30
   0   1   4 2157.88   37.70
   0   1  -4 2131.79   37.70
   0   1  -4 2176.28   37.60
   0   1   4 2202.08   37.80
  -1  -1  -4   45.20    1.50
   1  -1   4   41.50    2.10
  -1  -1  -4   40.50    1.90
   1  -1   4   43.40    1.60
  -1   1  -4   48.00    2.40
   1   1   4   49.20    2.60
   1   1   4   46.00    1.60
  -1   1  -4   44.20    1.60
   2  -1   4  549.85   10.70
  -2  -1  -4  533.85   10.70
  -2  -1  -4  553.44   10.10
   2  -1   4  554.14   10.10
  -2   1  -4  543.75   10.50
   2   1   4  543.05   10.50
  -2   1  -4  538.95   11.20
   2   1   4  558.44   11.40
  -3  -1  -4   56.89    2.70
   3  -1   4   59.19    2.60
   3  -1   4   61.09    2.20
  -3  -1  -4   64.89    2.20
   3   1   4   61.49    3.40
   3   1   4   62.99    2.70
  -3   1  -4   60.49    3.20
  -3   1  -4   60.09    2.60
   4  -1   4  135.19    3.70
   4  -1   4  141.79    4.50
  -4  -1  -4  134.59    3.70
   4   1   4  132.99    4.90
  -4   1  -4  132.99    4.40
  -4   1  -4  135.19    4.80
   4   1   4  127.19    4.30
   5  -1   4   28.70    2.60
  -5  -1  -4   32.00    2.90
   5   1   4   27.80    2.70
   5   1   4   34.60    3.10
  -5   1  -4   33.50    2.90
  -5   1  -4   29.50    2.90
   6  -1   4   45.10    3.50
  -6  -1  -4   46.00    3.30
  -6   1  -4   43.20    3.70
  -6   1  -4   47.90    3.50
   6   1   4   44.90    3.60
   6   1   4   44.50    3.60
   7  -1   4    6.30    2.30
  -7  -1  -4    7.10    2.20
   7   1   4    8.40    2.20
  -7   1  -4   11.10    2.60
  -8  -1  -4  114.49    5.90
   8  -1   4  109.09    5.60
   8   1   4  116.59    5.90
  -8   1  -4  104.29    5.80
  -9  -1  -4    6.00    2.90
   9  -1   4    7.60    2.80
   9   1   4    7.40    3.10
  -9   1  -4    8.90    2.80
  -9  -2   4   27.90    4.00
   9  -2  -4   22.20    3.70
  -9   2   4   24.10    3.80
   9   2  -4   36.70    4.80
  -8  -2   4    3.40    2.40
   8  -2  -4    0.90    2.10
  -8   2   4    2.00    2.40
   8   2  -4    0.20    2.60
  -7  -2   4   38.60    3.70
  -7  -2   4   37.80    3.50
   7  -2  -4   38.60    3.70
   7  -2  -4   42.90    3.70
  -7   2   4   41.60    4.20
   7   2  -4   49.60    4.50
   6  -2  -4    1.60    1.60
  -6  -2   4    0.10    1.70
   6  -2  -4   -0.50    1.70
  -6  -2   4    1.30    1.50
  -6   2   4    1.10    1.90
   6   2  -4    0.40    1.90
   5  -2  -4  219.58    6.70
  -5  -2   4  216.28    6.30
  -5  -2   4  217.48    6.70
   5  -2  -4  217.98    6.10
  -5   2   4  223.88    7.10
   5   2  -4  223.98    7.10
   4  -2  -4   66.19    2.90
   4  -2  -4   67.49    3.50
  -4  -2   4   65.89    3.00
  -4  -2   4   63.79    3.50
  -4   2   4   60.49    3.40
  -4   2   4   65.29    1.80
   4   2  -4   65.39    1.80
   4   2  -4   60.29    3.30
  -3  -2   4  322.87    7.00
   3  -2  -4  317.67    6.90
   3  -2  -4  301.27    7.70
  -3  -2   4  309.87    7.70
   3   2  -4  318.17    7.80
  -3   2   4  312.27    6.20
  -3   2   4  309.47    7.70
   3   2  -4  315.87    6.00
   2  -2  -4  258.87    5.50
  -2  -2   4  260.67    5.50
   2  -2  -4  249.18    6.30
  -2  -2   4  256.77    6.40
  -2   2   4  250.77    6.40
  -2   2   4  270.87    5.60
   2   2  -4  268.97    5.40
   2   2  -4  249.88    6.40
   1  -2  -4  299.87    6.70
  -1  -2   4  293.37    5.80
  -1  -2   4  301.77    6.80
   1  -2  -4  301.77    5.80
   1   2  -4  295.37    7.00
   1   2  -4  300.77    6.30
  -1   2   4  297.37    6.60
  -1   2   4  289.27    7.00
   0  -2  -4  651.03   12.20
   0  -2   4  639.34   12.30
   0   2  -4  654.33   12.60
   0   2   4  655.93   12.90
   0   2  -4  648.74   12.80
   0   2  -4  616.34   11.70
   0   2   4  656.83   11.80
   0   2   4  650.03   12.80
   1  -2   4   37.20    2.40
  -1  -2  -4   36.60    1.50
   1  -2   4   35.20    1.70
  -1  -2  -4   35.40    2.10
   1   2   4   40.00    2.80
   1   2   4   34.40    1.80
  -1   2  -4   37.80    2.70
  -1   2  -4   34.80    1.80
  -2  -2  -4   90.49    2.10
   2  -2   4   84.79    3.30
   2  -2   4   90.99    2.20
  -2  -2  -4   91.09    3.20
   2   2   4   88.59    3.00
  -2   2  -4   94.69    3.00
   2   2   4   90.69    4.10
  -2   2  -4   90.69    3.80
   3  -2   4  668.73   13.40
  -3  -2  -4  665.63   13.50
  -3  -2  -4  658.43   11.80
   3  -2   4  670.73   11.90
  -3   2  -4  634.44   14.10
   3   2   4  686.93   14.50
  -3   2  -4  657.93   13.30
   3   2   4  664.03   13.30
   4  -2   4   85.19    3.70
  -4  -2  -4   81.09    3.70
  -4   2  -4   79.49    3.60
   4   2   4   85.09    4.50
  -4   2  -4   86.09    4.30
   4   2   4   76.79    3.60
   5  -2   4   18.60    2.40
  -5  -2  -4   16.40    2.30
   5   2   4   19.30    2.60
  -5   2  -4   17.00    2.40
   5   2   4   16.60    2.80
  -5   2  -4   21.50    3.00
  -6  -2  -4  113.09    4.80
   6  -2   4  111.69    4.80
   6   2   4  111.49    5.20
  -6   2  -4  124.09    5.30
   6   2   4  110.59    5.70
  -6   2  -4  105.39    5.50
   7  -2   4    0.70    2.00
  -7  -2  -4    1.10    2.20
   7   2   4    0.40    2.10
  -7   2  -4    1.20    2.30
  -7   2  -4    0.40    2.00
   7   2   4    7.50    4.10
  -8  -2  -4    5.10    2.70
   8  -2   4    3.00    2.60
   8   2   4    3.70    2.40
  -8   2  -4    2.90    2.30
  -9  -2  -4    5.80    2.90
   9  -2   4    2.10    2.70
  -9   2  -4    1.60    2.40
   9   2   4    0.40    2.50
   9  -3  -4   40.50    4.50
  -9  -3   4   40.70    4.50
  -9   3   4   50.89    5.50
   9   3  -4   43.60    5.20
   8  -3  -4   26.60    3.50
   8  -3  -4   31.50    3.70
  -8  -3   4   26.10    3.40
  -8   3   4   31.60    4.50
   8   3  -4   21.70    4.00
  -7  -3   4   11.30    2.70
   7  -3  -4   11.80    2.70
   7  -3  -4   11.80    2.50
  -7  -3   4   11.90    2.80
  -7   3   4    8.70    2.90
   7   3  -4    8.40    2.80
  -6  -3   4   23.70    2.70
   6  -3  -4   24.50    3.20
  -6  -3   4   20.00    3.10
   6  -3  -4   19.90    2.50
   6   3  -4   29.90    3.60
  -6   3   4   30.50    3.70
   5  -3  -4  285.57    7.40
  -5  -3   4  270.57    7.30
  -5  -3   4  278.77    8.40
   5  -3  -4  275.67    8.30
   5   3  -4  282.07    8.60
  -5   3   4  278.27    8.50
  -4  -3   4   38.20    2.70
   4  -3  -4   38.40    2.40
  -4  -3   4   36.50    3.30
   4   3  -4   27.60    2.90
  -4   3   4   40.00    3.40
   3  -3  -4  176.08    4.60
  -3  -3   4  172.58    5.70
  -3  -3   4  170.48    4.70
   3   3  -4  181.78    5.90
  -3   3   4  167.98    5.60
   3   3  -4  174.18    4.00
  -3   3   4  166.88    4.20
  -2  -3   4   14.00    1.30
  -2  -3   4   10.40    2.00
   2  -3  -4   12.00    1.30
  -2   3   4   13.60    2.00
   2   3  -4   14.10    2.10
   2   3  -4   14.00    1.40
  -2   3   4   13.90    1.60
   1  -3  -4  140.59    3.60
   1  -3  -4  140.39    4.40
  -1  -3   4  137.19    3.60
  -1  -3   4  138.29    4.60
  -1   3   4  134.59    4.60
   1   3  -4  137.69    4.20
  -1   3   4  142.59    4.40
   1   3  -4  138.39    4.70
   0  -3  -4  196.08    5.00
   0  -3   4  193.98    5.20
   0   3   4  197.58    5.80
   0   3   4  196.58    4.80
   0   3  -4  201.38    5.70
   0   3   4  200.18    5.90
   0   3  -4  206.18    4.90
   0   3  -4  194.18    5.70
  -1  -3  -4  186.08    5.30
  -1  -3  -4  195.98    4.60
   1  -3   4  195.98    4.80
  -1   3  -4  193.08    5.90
   1   3   4  207.78    6.30
  -1   3  -4  204.78    5.00
   1   3   4  199.68    5.00
  -2  -3  -4   21.20    1.20
   2  -3   4   23.70    1.50
   2  -3   4   25.20    2.30
  -2  -3  -4   21.40    2.00
  -2   3  -4   28.40    2.20
  -2   3  -4   19.30    2.40
   2   3   4   25.40    2.80
   2   3   4   22.60    2.00
   3  -3   4  129.69    2.90
   3  -3   4  133.59    4.60
  -3  -3  -4  136.19    4.70
  -3   3  -4  131.29    4.50
   3   3   4  130.99    4.50
  -3   3  -4  131.29    5.40
   3   3   4  133.79    5.70
  -4  -3  -4   17.00    2.30
   4  -3   4   18.70    2.10
   4   3   4   15.00    2.70
   4   3   4   15.90    2.20
  -4   3  -4   20.00    2.40
  -4   3  -4   15.10    2.60
   5  -3   4   74.29    4.00
  -5  -3  -4   73.49    4.10
  -5   3  -4   77.89    4.20
  -5   3  -4   52.69    4.40
   5   3   4   79.59    5.10
   5   3   4   72.39    4.20
  -6  -3  -4    0.60    1.80
   6  -3   4    0.80    1.60
  -6   3  -4    0.80    1.90
  -6   3  -4    1.00    2.40
   6   3   4   -0.30    2.00
   6   3   4    0.10    2.40
  -7  -3  -4   55.99    4.10
   7  -3   4   42.80    4.00
  -7   3  -4   49.10    4.50
  -7   3  -4   41.60    4.50
   7   3   4   46.90    4.40
   7   3   4   47.50    4.80
   8  -3   4   -1.50    2.20
  -8  -3  -4    4.60    2.80
   8   3   4    4.10    2.80
  -8   3  -4    7.30    2.90
  -8   3  -4    4.50    2.50
   9  -3   4    9.30    3.30
  -9  -3  -4    9.40    3.50
  -9   3  -4    7.60    2.90
   9   3   4   14.90    3.60
   9  -4  -4   24.80    3.90
  -9  -4   4   32.80    4.30
   9  -4  -4   25.80    3.90
   9   4  -4   21.40    4.50
  -9   4   4   26.50    4.80
   8  -4  -4    7.30    2.90
   8  -4  -4    4.00    2.40
  -8  -4   4    7.00    2.80
  -8  -4   4    3.70    2.90
   8   4  -4   10.40    3.30
  -8   4   4    5.30    2.90
  -7  -4   4    2.90    2.50
   7  -4  -4    3.30    2.60
  -7  -4   4    6.20    2.30
   7  -4  -4    5.80    2.10
   7   4  -4    2.80    2.90
  -7   4   4    3.80    2.50
   6  -4  -4   -2.10    2.00
   6  -4  -4    1.30    1.60
  -6  -4   4    0.70    2.30
  -6  -4   4    2.20    1.90
   6   4  -4    1.20    2.50
  -6   4   4   -5.10    2.00
   5  -4  -4   91.49    4.00
  -5  -4   4   90.39    4.30
  -5  -4   4   83.39    5.20
   5  -4  -4   93.79    5.20
  -5   4   4   95.29    5.10
   5   4  -4   90.39    5.30
  -4  -4   4    2.30    2.30
  -4  -4   4    6.60    1.60
   4  -4  -4    5.80    1.50
   4   4  -4    5.50    2.20
  -4   4   4    5.80    2.30
   3  -4  -4  129.59    4.10
  -3  -4   4  126.19    4.10
  -3   4   4  121.49    5.30
   3   4  -4  127.59    5.30
   2  -4  -4    3.50    1.10
  -2  -4   4    3.60    1.20
   2   4  -4    4.00    1.20
  -2   4   4    1.40    1.90
  -2   4   4    3.50    1.40
   2   4  -4    2.00    1.80
   1  -4  -4  199.68    5.90
   1  -4  -4  200.38    5.10
  -1  -4   4  212.18    6.30
  -1  -4   4  195.18    5.10
  -1   4   4  187.38    6.20
   1   4  -4  185.08    6.20
   1   4  -4  199.38    5.70
  -1   4   4  201.48    6.10
   0  -4   4    0.60    1.30
   0  -4  -4    1.30    1.10
   0   4   4    1.40    1.20
   0   4  -4    1.30    1.50
   0   4   4   -2.50    1.40
   0   4   4   -1.60    1.50
   0   4  -4   -1.00    1.40
   0   4  -4   -0.90    1.00
   1  -4   4   24.40    2.00
  -1  -4  -4   24.10    1.80
  -1  -4  -4   26.10    2.50
   1   4   4   28.40    2.40
  -1   4  -4   25.10    2.70
  -1   4  -4   28.20    2.90
  -1   4  -4   29.40    2.40
   1   4   4   24.80    3.00
   2  -4   4    1.40    0.90
  -2  -4  -4    1.90    1.40
   2  -4   4    1.90    1.60
  -2  -4  -4    2.20    0.80
  -2   4  -4    2.70    2.00
   2   4   4    1.80    1.40
   2   4   4   -0.20    1.80
  -2   4  -4    2.80    1.40
  -3  -4  -4  470.05   10.90
   3  -4   4  470.55   10.80
   3   4   4  447.56   10.70
   3   4   4  478.65   12.60
  -3   4  -4  442.66   10.70
  -3   4  -4  454.55   12.00
   4  -4   4    6.90    2.00
  -4  -4  -4    3.10    1.70
  -4   4  -4    7.00    2.00
   4   4   4    6.60    2.90
   4   4   4    5.30    2.00
  -4   4  -4    3.20    2.30
  -5  -4  -4   66.39    4.20
   5  -4   4   70.49    4.20
   5   4   4   69.29    4.50
  -5   4  -4   70.89    5.20
   5   4   4   68.09    5.60
  -5   4  -4   76.59    4.50
  -6  -4  -4    9.90    2.50
   6  -4   4    6.90    2.40
   6   4   4    6.20    3.10
  -6   4  -4    6.90    2.40
  -6   4  -4    1.50    2.60
   6   4   4    5.00    2.50
  -7  -4  -4   33.10    4.00
   7  -4   4   29.60    3.40
  -7   4  -4   29.10    3.80
   7   4   4   25.90    4.50
   7   4   4   22.60    3.70
  -7   4  -4   23.40    4.00
  -8  -4  -4   -0.10    2.60
   8  -4   4    5.10    2.70
  -8   4  -4    4.00    3.10
  -8   4  -4    4.10    2.60
   8   4   4    4.20    3.50
   8   4   4    2.10    2.90
   8  -5  -4    8.90    3.00
  -8  -5   4    9.30    3.50
   8  -5  -4    8.80    2.80
  -8  -5   4   11.80    3.10
   8   5  -4    6.00    3.40
  -8   5   4   11.70    3.60
  -7  -5   4    9.60    3.20
   7  -5  -4    9.20    2.60
  -7  -5   4    5.90    2.50
   7  -5  -4   10.90    3.00
  -7   5   4    9.10    3.40
   7   5  -4   12.80    3.70
   6  -5  -4    6.50    2.00
   6  -5  -4    9.50    2.90
  -6  -5   4   13.40    3.20
  -6  -5   4    6.70    2.40
  -6   5   4    6.00    2.70
   6   5  -4   11.00    3.30
   5  -5  -4  130.09    4.90
  -5  -5   4  139.69    6.80
   5  -5  -4  137.59    6.60
  -5  -5   4  138.29    5.40
   5   5  -4  123.79    6.30
  -5   5   4  141.99    6.70
  -4  -5   4    4.30    2.70
   4  -5  -4    7.10    1.60
  -4  -5   4    6.90    1.80
  -4   5   4    8.50    2.70
   4   5  -4    5.00    2.40
  -3  -5   4  342.57   10.00
   3  -5  -4  322.47    8.00
  -3  -5   4  321.97    8.10
  -3   5   4  341.87    9.90
   3   5  -4  329.57    9.80
   2  -5  -4   -0.40    1.10
  -2  -5   4   -1.00    2.00
  -2  -5   4    1.10    1.20
   2   5  -4    1.10    1.50
  -2   5   4   -0.80    1.40
  -2   5   4    0.20    2.00
   2   5  -4    2.90    2.10
  -1  -5   4  202.78    6.60
   1  -5  -4  198.78    6.30
  -1  -5   4  185.58    5.40
   1  -5  -4  184.28    5.40
  -1   5   4  188.38    6.70
   1   5  -4  197.08    6.80
  -1   5   4  197.48    6.60
   1   5  -4  195.48    6.20
   0  -5  -4    2.70    1.50
   0  -5   4    2.90    1.70
   0   5  -4    6.40    1.60
   0   5  -4    5.40    2.20
   0   5   4    1.30    1.80
   0   5   4    4.00    2.20
   0   5  -4    5.60    2.00
   0   5   4    5.40    1.60
  -1  -5  -4  242.38    6.20
   1  -5   4  227.48    6.50
  -1  -5  -4  228.48    6.90
   1   5   4  223.68    8.00
  -1   5  -4  247.48    6.80
  -1   5  -4  236.58    7.70
   1   5   4  243.28    6.80
   2  -5   4    9.80    2.10
   2  -5   4    9.80    1.50
  -2  -5  -4    6.50    1.80
  -2   5  -4   11.90    2.20
   2   5   4   14.50    3.10
   2   5   4   12.30    2.20
  -2   5  -4   11.90    2.80
  -3  -5  -4   45.00    3.40
   3  -5   4   32.30    3.00
   3   5   4   29.60    3.70
   3   5   4   38.30    3.30
  -3   5  -4   35.30    3.90
  -3   5  -4   40.90    3.40
   4  -5   4    4.50    2.00
  -4  -5  -4    3.20    2.00
  -4   5  -4    5.50    2.10
   4   5   4    5.30    2.10
  -4   5  -4    4.40    2.50
   4   5   4    7.50    2.90
  -5  -5  -4   38.00    3.80
   5  -5   4   27.80    3.00
   5   5   4   33.20    3.70
  -5   5  -4   41.50    4.70
  -5   5  -4   30.40    3.50
   5   5   4   26.20    4.20
  -6  -5  -4    5.60    2.50
   6  -5   4    4.00    2.30
   6   5   4    4.60    2.70
  -6   5  -4    3.00    2.30
  -6   5  -4   -0.30    2.70
   6   5   4    3.90    3.40
   7  -5   4   36.50    4.00
  -7  -5  -4   32.80    3.90
   7   5   4   39.50    4.60
  -7   5  -4   39.10    5.10
  -7   5  -4   38.70    4.50
   7   5   4   36.40    5.30
   8  -5   4    4.70    2.70
  -8  -5  -4   -0.80    2.70
   8   5   4    2.50    3.60
  -8   5  -4    1.40    2.60
  -8   5  -4    2.30    3.20
   8   5   4    2.30    3.00
   7  -6  -4   23.10    4.00
  -7  -6   4   19.80    4.00
  -7   6   4   25.80    4.30
   7   6  -4   21.30    4.40
  -6  -6   4    3.30    2.40
  -6  -6   4   10.70    3.40
   6  -6  -4    8.10    3.10
   6   6  -4    6.60    3.40
  -6   6   4   10.10    3.50
  -5  -6   4   40.60    4.70
  -5  -6   4   52.09    3.90
   5  -6  -4   39.90    4.60
   5   6  -4   42.60    4.90
  -5   6   4   43.80    5.00
   4  -6  -4   18.50    2.30
   4  -6  -4   21.70    3.40
  -4  -6   4   20.80    3.50
  -4  -6   4   19.00    2.50
   4   6  -4   19.40    3.50
  -4   6   4   30.70    4.20
   3  -6  -4  110.29    4.40
  -3  -6   4  118.69    4.60
  -3  -6   4  111.99    5.90
   3  -6  -4  115.09    5.90
   3   6  -4  116.59    6.20
  -3   6   4  119.69    6.20
   2  -6  -4    0.30    1.90
   2  -6  -4    0.70    1.30
  -2  -6   4    0.40    1.40
  -2  -6   4    0.80    2.30
  -2   6   4    0.10    2.20
   2   6  -4    1.40    2.30
   1  -6  -4   66.89    3.50
   1  -6  -4   70.99    4.20
  -1  -6   4   73.09    3.50
  -1  -6   4   68.09    4.50
  -1   6   4   66.69    4.60
   1   6  -4   68.99    4.70
  -1   6   4   66.09    4.70
   1   6  -4   68.99    4.10
   0  -6  -4   19.80    2.50
   0  -6   4   19.60    2.70
   0   6   4   20.90    3.10
   0   6   4   16.90    3.10
   0   6  -4   17.90    2.80
   0   6  -4   20.60    3.10
   0   6   4   17.70    2.40
   1  -6   4  252.57    7.40
  -1  -6  -4  260.57    7.90
   1   6   4  250.87    7.60
  -1   6  -4  242.58    7.60
  -1   6  -4  255.17    8.70
   1   6   4  261.57    9.20
  -2  -6  -4  125.09    5.30
   2  -6   4  109.09    5.10
   2   6   4  116.39    5.30
  -2   6  -4  112.79    5.20
  -2   6  -4  119.39    6.20
   2   6   4  123.59    6.70
   3  -6   4  178.28    6.60
  -3  -6  -4  186.48    6.70
   3   6   4  188.18    6.90
  -3   6  -4  167.88    7.10
  -3   6  -4  186.28    8.00
   3   6   4  178.48    8.30
  -4  -6  -4   12.70    2.50
   4  -6   4   13.40    2.60
  -4   6  -4   15.40    3.40
  -4   6  -4    7.70    3.10
   4   6   4    5.40    3.20
   4   6   4   16.10    2.90
  -5  -6  -4   95.69    5.30
   5  -6   4  107.89    5.50
   5   6   4  108.89    7.60
  -5   6  -4   98.19    6.80
   5   6   4   98.19    5.90
   6  -6   4    3.00    2.40
  -6  -6  -4    7.50    2.80
   6   6   4    4.90    3.80
  -6   6  -4    4.90    3.30
   6   6   4    5.10    2.90
   7  -6   4    5.00    2.80
  -7  -6  -4   -0.10    2.50
  -7   6  -4    7.20    3.50
   7   6   4    1.00    3.50
   7   6   4    3.90    3.10
  -6  -7   4   66.49    6.00
   6  -7  -4   60.59    6.00
   6   7  -4   71.39    6.50
  -6   7   4   66.89    6.40
   5  -7  -4   27.50    4.20
  -5  -7   4   25.90    4.40
  -5   7   4   34.70    4.80
   5   7  -4   36.90    4.80
   4  -7  -4   95.59    6.30
  -4  -7   4   93.19    6.60
  -4   7   4   91.89    6.40
   4   7  -4   85.49    6.20
   3  -7  -4   91.19    5.60
  -3  -7   4   94.79    6.20
   3   7  -4   96.99    6.40
  -3   7   4   93.69    6.30
   2  -7  -4  119.29    6.00
  -2  -7   4  115.39    6.40
  -2   7   4  126.79    6.60
   2   7  -4  129.29    6.70
  -1  -7   4   14.10    3.00
   1  -7  -4    9.60    2.30
  -1   7   4   11.50    3.00
   1   7  -4    8.40    2.90
   0  -7  -4    2.50    1.80
   0  -7   4   -1.70    1.80
   0   7   4    2.30    2.50
   0   7  -4    0.00    2.30
   0   7  -4    1.50    2.10
  -1  -7  -4   32.80    3.60
   1  -7   4   28.30    3.50
   1   7   4   27.10    4.00
  -1   7  -4   28.40    3.90
   2  -7   4   28.60    3.40
  -2  -7  -4   30.30    3.40
  -2   7  -4   35.30    4.30
   2   7   4   28.80    4.40
   3  -7   4   62.09    4.60
  -3  -7  -4   49.00    4.30
  -3   7  -4   68.99    6.00
   3   7   4   59.49    6.10
  -4  -7  -4    3.40    2.30
   4  -7   4    3.10    2.20
  -4   7  -4   -2.20    2.60
   4   7   4    3.00    3.30
   5  -7   4   19.70    3.40
  -5  -7  -4   20.50    3.40
  -5   7  -4   27.40    4.60
   5   7   4   23.50    4.80
  -6  -7  -4   27.40    3.90
   6  -7   4   26.20    3.70
   6   7   4   20.30    5.10
  -6   7  -4   41.00    5.70
   5  -8  -4    5.00    3.20
  -5  -8   4    0.30    3.50
   5   8  -4    2.90    3.30
  -5   8   4    7.80    3.60
   4  -8  -4    0.90    2.60
  -4  -8   4    4.80    3.20
   4   8  -4    5.50    3.40
  -4   8   4   -1.20    3.00
  -3  -8   4    0.30    3.00
   3  -8  -4    0.20    2.30
   3   8  -4    0.00    2.60
  -3   8   4    0.10    2.70
  -2  -8   4   13.10    3.50
   2  -8  -4   12.90    3.00
   2   8  -4   14.70    3.60
  -2   8   4    9.40    3.50
   1  -8  -4   20.50    3.20
  -1  -8   4   18.60    3.60
   1   8  -4   16.00    3.60
  -1   8   4   22.70    3.80
   0  -8  -4  117.79    6.10
   0   8  -4  107.19    6.30
   0   8   4  113.29    6.80
  -1  -8  -4    2.30    2.30
   1  -8   4    2.10    2.30
  -1   8  -4    3.20    2.60
   1   8   4    1.40    2.70
  -2  -8  -4   12.80    2.80
   2  -8   4   13.90    2.80
   2   8   4   11.60    3.70
  -2   8  -4   12.00    3.50
   3  -8   4    8.70    2.80
  -3  -8  -4    4.10    2.50
   3   8   4    5.50    3.70
  -3   8  -4    9.30    3.40
  -4  -8  -4    9.50    2.90
   4  -8   4   10.50    3.00
  -4   8  -4   14.20    3.90
   4   8   4    7.90    3.90
   2  -9  -4   64.29    5.40
  -2  -9   4   66.49    6.10
   2   9  -4   58.49    7.90
  -1  -9   4   -2.10    2.80
   0  -9   4  143.89    7.40
   1  -9   4   -3.40    2.70
   1   9   4    5.30    3.20
  10   0  -5   17.20    4.00
 -10   0   5   13.60    3.50
   9   0  -5   19.20    3.70
  -9   0   5   22.70    3.80
   8   0  -5   21.80    3.50
  -8   0   5   17.50    3.20
   7   0  -5    9.30    2.60
  -7   0   5   12.20    2.80
   6   0  -5    2.20    1.80
  -6   0   5    0.20    1.80
   6   0  -5    1.80    1.30
  -5   0   5  184.08    5.80
   5   0  -5  197.58    5.80
  -5   0   5  187.68    5.00
   5   0  -5  188.48    5.10
   4   0  -5    2.70    1.10
  -4   0   5    2.80    1.10
   4   0  -5    1.70    1.40
  -4   0   5    1.20    1.20
   3   0  -5    9.30    1.50
  -3   0   5    9.20    1.20
  -3   0   5    6.00    1.30
   3   0  -5   10.60    1.30
   2   0  -5   -0.40    0.90
   2   0  -5   -1.50    0.80
  -2   0   5   -0.40    1.00
  -2   0   5   -1.00    0.80
  -1   0   5 2625.54   45.40
   1   0  -5 2626.34   45.30
  -1   0   5 2655.43   45.40
   0   0  -5    1.70    0.70
   0   0   5    2.30    0.80
   0   0   5    2.40    0.80
   0   0  -5    3.20    0.70
  -1   0  -5 1698.43   29.80
   1   0   5 1703.83   29.80
   1   0   5 1739.23   30.10
  -1   0  -5 1721.73   30.00
   2   0   5   83.29    2.70
  -2   0  -5   80.69    2.90
  -2   0  -5   85.09    2.70
   2   0   5   81.79    2.80
   3   0   5    2.70    1.10
   3   0   5    4.50    1.30
  -3   0  -5    3.70    1.10
  -3   0  -5    2.80    1.20
   4   0   5   52.39    2.80
   4   0   5   53.09    3.00
  -4   0  -5   51.19    2.90
  -4   0  -5   51.49    2.80
   5   0   5    7.40    1.80
  -5   0  -5    4.40    1.50
  -5   0  -5    3.40    1.50
   5   0   5    8.00    1.80
  -6   0  -5   13.20    2.30
   6   0   5   15.80    2.40
  -7   0  -5   24.80    3.20
   7   0   5   16.40    2.90
   8   0   5    1.00    2.30
  -8   0  -5    1.00    2.00
   9   0   5   -0.30    2.50
  -9   0  -5   -1.70    2.00
   9  -1  -5   21.40    3.70
  -9  -1   5   22.70    3.70
  -9   1   5   23.10    4.10
   9   1  -5   28.50    4.20
  -8  -1   5   13.20    3.10
   8  -1  -5   12.80    2.90
  -8   1   5   15.70    3.40
   8   1  -5    8.80    2.80
  -7  -1   5   25.70    3.10
   7  -1  -5   25.40    3.10
   7  -1  -5   29.30    2.90
   7   1  -5   23.60    3.10
  -7   1   5   31.40    3.80
   6  -1  -5   41.80    3.10
  -6  -1   5   38.10    3.00
   6  -1  -5   35.80    3.10
  -6  -1   5   34.70    3.00
  -6   1   5   34.60    3.30
   6   1  -5   39.10    3.50
  -5  -1   5   86.39    3.70
   5  -1  -5   88.79    3.70
   5  -1  -5   82.79    3.70
  -5  -1   5   79.39    3.60
   5   1  -5   83.19    4.10
  -5   1   5   85.89    2.70
   5   1  -5   84.79    2.80
  -5   1   5   85.69    4.20
  -4  -1   5   49.40    2.70
  -4  -1   5   50.39    2.80
   4  -1  -5   50.89    2.70
   4  -1  -5   52.29    2.70
  -4   1   5   50.59    1.80
   4   1  -5   49.99    2.00
   4   1  -5   47.20    2.80
  -4   1   5   54.19    3.20
   3  -1  -5  407.76    8.40
  -3  -1   5  404.16    8.90
  -3  -1   5  414.36    8.50
   3  -1  -5  408.36    8.90
  -3   1   5  414.56    7.90
   3   1  -5  418.76    9.10
  -3   1   5  411.66    9.20
   3   1  -5  419.26    7.90
   2  -1  -5  158.08    3.70
   2  -1  -5  165.18    4.30
  -2  -1   5  154.38    3.70
  -2  -1   5  162.18    4.30
   2   1  -5  164.58    3.60
  -2   1   5  163.28    4.50
  -2   1   5  159.28    3.60
   2   1  -5  161.08    4.50
   1  -1  -5   26.30    1.80
   1  -1  -5   26.30    1.00
  -1  -1   5   24.50    1.90
  -1  -1   5   26.80    1.10
  -1   1   5   24.60    1.50
  -1   1   5   26.90    2.10
   1   1  -5   27.20    1.50
   1   1  -5   29.00    2.00
   0  -1   5   44.20    1.90
   0  -1  -5   42.90    1.70
   0   1  -5   37.20    2.10
   0   1   5   43.30    2.20
   0   1  -5   40.90    2.00
   0   1   5   44.90    2.30
   1  -1   5  419.16    8.30
   1  -1   5  408.26    7.80
  -1  -1  -5  418.86    8.30
  -1  -1  -5  413.06    7.70
   1   1   5  408.56    7.70
  -1   1  -5  410.86    7.60
  -1   1  -5  401.46    8.50
   1   1   5  405.66    8.60
   2  -1   5   31.40    1.60
   2  -1   5   30.50    2.10
  -2  -1  -5   29.70    2.00
  -2  -1  -5   30.40    1.50
  -2   1  -5   26.70    1.60
   2   1   5   31.30    2.50
   2   1   5   28.60    1.70
  -2   1  -5   29.30    2.20
   3  -1   5  205.18    5.40
  -3  -1  -5  218.18    4.90
   3  -1   5  227.68    5.00
  -3  -1  -5  214.78    5.60
   3   1   5  229.58    6.30
   3   1   5  216.68    5.40
  -3   1  -5  220.28    6.00
  -3   1  -5  211.08    5.30
  -4  -1  -5   17.10    1.90
   4  -1   5   23.10    1.80
   4  -1   5   24.80    2.20
  -4  -1  -5   20.80    1.70
   4   1   5   24.60    2.20
  -4   1  -5   18.80    2.40
  -4   1  -5   21.20    1.90
   4   1   5   22.50    2.50
  -5  -1  -5   40.90    2.80
   5  -1   5   39.80    3.10
   5   1   5   32.50    2.80
  -5   1  -5   31.00    3.00
  -5   1  -5   37.80    3.10
   5   1   5   38.90    3.30
   6  -1   5   26.90    2.90
  -6  -1  -5   16.70    2.50
  -6   1  -5   29.90    3.10
   6   1   5   20.10    2.80
   6   1   5   22.50    2.60
  -6   1  -5   29.60    3.10
   7  -1   5  133.99    5.80
  -7  -1  -5  117.09    5.70
   7   1   5  142.29    6.10
  -7   1  -5  129.19    5.80
   8  -1   5   27.20    3.70
  -8  -1  -5   23.10    3.30
  -8   1  -5   17.00    3.10
   8   1   5   20.30    3.60
  -9  -1  -5   20.80    3.70
   9  -1   5   16.70    3.60
  -9   1  -5   16.50    3.40
   9   1   5   12.70    3.10
  -9  -2   5   39.10    4.40
   9  -2  -5   40.80    4.40
  -9   2   5   33.10    4.50
   9   2  -5   41.10    5.10
   8  -2  -5   21.40    3.20
  -8  -2   5   27.00    3.40
  -8   2   5   28.30    4.10
   8   2  -5   20.90    3.80
   7  -2  -5  127.99    5.50
  -7  -2   5  112.39    5.30
   7  -2  -5  104.79    5.10
  -7  -2   5  122.49    5.40
   7   2  -5  106.49    5.90
  -7   2   5  124.59    6.10
  -6  -2   5  224.08    7.00
   6  -2  -5  212.08    7.00
  -6  -2   5  223.08    6.80
   6  -2  -5  214.68    6.60
  -6   2   5  214.18    7.50
   6   2  -5  230.28    7.70
   5  -2  -5  227.78    6.30
  -5  -2   5  240.08    6.90
   5  -2  -5  222.68    6.80
  -5  -2   5  226.18    6.40
  -5   2   5  228.38    7.10
   4  -2  -5   63.69    3.40
  -4  -2   5   61.69    2.90
   4  -2  -5   65.49    2.80
  -4  -2   5   61.09    3.40
  -4   2   5   65.49    3.70
  -4   2   5   61.39    1.90
   4   2  -5   61.59    1.90
   4   2  -5   55.59    3.50
   3  -2  -5  323.77    8.10
  -3  -2   5  348.67    8.30
  -3  -2   5  358.96    7.40
   3  -2  -5  356.96    7.40
   3   2  -5  346.17    8.50
   3   2  -5  348.47    6.80
  -3   2   5  337.87    8.40
  -3   2   5  348.27    6.90
   2  -2  -5  122.09    3.10
  -2  -2   5  123.89    3.10
  -2  -2   5  119.19    4.10
   2  -2  -5  114.69    3.90
   2   2  -5  120.79    3.10
   2   2  -5  119.69    4.20
  -2   2   5  126.09    4.30
  -2   2   5  124.39    3.40
  -1  -2   5  101.39    3.60
   1  -2  -5  106.09    3.40
  -1  -2   5  106.49    2.50
   1  -2  -5  104.79    2.50
   1   2  -5  108.29    3.20
   1   2  -5  106.89    3.80
  -1   2   5  108.59    3.90
  -1   2   5  111.19    3.40
   0  -2  -5  289.07    6.20
   0  -2   5  279.77    6.30
   0   2  -5  285.47    5.60
   0   2   5  298.27    5.70
   0   2   5  294.77    6.90
   0   2   5  282.97    6.80
   0   2  -5  288.57    6.60
   0   2  -5  282.37    6.70
   1  -2   5   39.50    2.30
   1  -2   5   39.10    1.80
  -1  -2  -5   43.40    2.30
  -1  -2  -5   43.60    1.70
  -1   2  -5   38.90    2.70
   1   2   5   44.00    1.90
  -1   2  -5   44.50    1.80
   1   2   5   38.60    2.70
   2  -2   5   32.40    1.40
  -2  -2  -5   32.60    1.30
   2  -2   5   31.40    2.20
  -2  -2  -5   35.70    2.20
  -2   2  -5   32.30    2.00
  -2   2  -5   34.20    2.80
   2   2   5   29.70    2.70
   2   2   5   33.10    2.10
   3  -2   5  654.73   13.80
  -3  -2  -5  683.93   13.90
   3  -2   5  674.93   12.40
  -3  -2  -5  697.63   12.40
   3   2   5  688.43   14.90
  -3   2  -5  698.93   14.70
  -3   2  -5  681.33   13.60
   3   2   5  706.03   13.80
  -4  -2  -5   51.59    2.90
   4  -2   5   48.20    2.90
  -4   2  -5   49.00    2.90
   4   2   5   49.50    3.00
  -4   2  -5   53.19    3.70
   4   2   5   48.20    3.70
   5  -2   5    8.00    1.90
  -5  -2  -5    6.10    1.90
  -5   2  -5    5.80    2.20
   5   2   5    4.10    2.20
  -5   2  -5    4.70    1.70
   5   2   5    5.40    1.80
  -6  -2  -5   50.59    3.50
   6  -2   5   44.50    3.40
  -6   2  -5   46.00    4.20
  -6   2  -5   52.99    3.80
   6   2   5   61.49    4.50
   6   2   5   52.49    3.90
  -7  -2  -5   20.50    2.90
   7  -2   5   17.30    2.70
   7   2   5   19.80    3.00
  -7   2  -5   18.50    3.30
  -7   2  -5   20.50    3.10
  -8  -2  -5   21.20    3.50
   8  -2   5   18.40    3.10
   8   2   5   21.10    3.70
  -8   2  -5   23.70    3.60
  -9  -2  -5   14.30    3.20
   9  -2   5   12.90    3.40
   9   2   5   10.00    3.30
  -9   2  -5   13.70    3.40
   9  -3  -5    1.60    2.50
  -9  -3   5    2.40    2.60
  -9   3   5    3.60    3.00
   9   3  -5    1.60    3.10
   8  -3  -5   70.89    5.00
  -8  -3   5   88.69    5.20
   8  -3  -5   74.69    5.00
   8   3  -5   70.99    5.50
  -8   3   5   70.09    6.00
  -7  -3   5    7.60    2.50
   7  -3  -5    3.70    2.10
   7  -3  -5    1.80    2.20
  -7  -3   5    6.50    2.30
   7   3  -5    7.60    2.70
  -7   3   5    7.80    2.90
  -6  -3   5    6.50    2.40
  -6  -3   5    7.60    2.10
   6  -3  -5    7.70    2.30
   6  -3  -5    6.60    1.80
  -6   3   5    8.80    2.80
   6   3  -5    6.20    2.50
   5  -3  -5   31.80    3.30
   5  -3  -5   30.80    2.60
  -5  -3   5   37.30    3.40
  -5  -3   5   38.90    3.00
   5   3  -5   31.00    3.20
  -5   3   5   33.50    3.40
   4  -3  -5   20.90    2.00
  -4  -3   5   24.10    2.90
  -4  -3   5   15.20    1.90
   4  -3  -5   18.50    2.50
  -4   3   5   19.90    2.70
   4   3  -5   15.40    2.50
   3  -3  -5   89.29    3.10
  -3  -3   5   86.19    4.20
   3  -3  -5   89.59    4.10
  -3  -3   5   83.69    3.10
   3   3  -5   89.59    2.70
  -3   3   5   87.29    4.30
  -3   3   5   88.99    2.90
   3   3  -5   83.09    4.10
   2  -3  -5   40.80    1.90
  -2  -3   5   39.30    3.00
   2  -3  -5   35.80    2.80
  -2  -3   5   36.80    1.90
   2   3  -5   39.60    3.00
  -2   3   5   42.20    3.20
  -2   3   5   36.30    2.30
   2   3  -5   39.70    2.10
  -1  -3   5  110.69    4.10
  -1  -3   5  110.09    3.00
   1  -3  -5  109.79    3.90
   1  -3  -5  111.09    3.00
  -1   3   5  110.59    4.20
   1   3  -5  110.49    3.80
  -1   3   5  102.39    4.00
   1   3  -5  113.39    4.20
   0  -3   5  191.48    5.10
   0  -3  -5  186.58    4.90
   0   3  -5  176.18    5.40
   0   3   5  194.28    4.50
   0   3   5  190.08    5.60
   0   3   5  180.68    5.70
   0   3  -5  176.18    5.40
   0   3  -5  191.08    4.50
  -1  -3  -5   74.49    2.50
   1  -3   5   73.69    2.70
  -1  -3  -5   81.19    3.50
  -1   3  -5   69.09    3.70
   1   3   5   77.69    3.80
  -1   3  -5   79.79    2.80
   1   3   5   79.19    2.90
  -2  -3  -5  157.98    5.00
   2  -3   5  162.58    5.10
  -2  -3  -5  167.58    3.70
   2  -3   5  165.38    3.90
   2   3   5  163.68    4.70
   2   3   5  160.08    6.00
  -2   3  -5  157.08    5.70
  -2   3  -5  169.88    4.70
  -3  -3  -5   60.29    3.30
   3  -3   5   62.29    3.40
  -3  -3  -5   59.79    1.80
   3  -3   5   59.29    1.80
  -3   3  -5   57.29    3.10
  -3   3  -5   58.09    3.90
   3   3   5   56.39    4.10
   3   3   5   61.39    3.10
   4  -3   5   43.00    3.20
  -4  -3  -5   49.99    3.30
  -4   3  -5   46.00    3.20
   4   3   5   47.00    3.20
  -4   3  -5   51.39    4.10
   4   3   5   45.50    4.20
  -5  -3  -5   34.70    3.20
   5  -3   5   32.30    3.10
  -5   3  -5   35.10    3.20
   5   3   5   36.10    3.30
  -5   3  -5   27.90    3.50
   5   3   5   37.90    4.00
  -6  -3  -5   56.49    4.10
   6  -3   5   53.39    4.00
   6   3   5   62.79    4.40
  -6   3  -5   60.49    4.30
  -6   3  -5   64.39    5.20
   6   3   5   65.69    5.40
   7  -3   5   87.89    5.20
  -7  -3  -5   94.89    5.30
  -7   3  -5   88.19    6.00
  -7   3  -5   90.69    5.40
   7   3   5   81.79    6.10
   7   3   5   94.19    5.60
  -8  -3  -5   47.50    4.60
   8  -3   5   39.30    4.20
  -8   3  -5   53.99    5.20
  -8   3  -5   41.60    4.80
   8   3   5   43.70    4.70
   9  -3   5   29.90    4.30
  -9  -3  -5   35.80    4.60
   9   3   5   36.10    4.90
  -9   3  -5   32.10    4.30
   9  -4  -5    2.20    2.50
  -9  -4   5    0.80    2.70
   9  -4  -5    1.50    2.50
   9   4  -5    6.60    3.60
  -9   4   5    3.40    3.40
  -8  -4   5   15.50    3.60
   8  -4  -5   15.50    3.00
   8  -4  -5   20.80    3.50
  -8  -4   5   10.40    3.00
  -8   4   5   15.00    3.50
   8   4  -5   15.30    3.60
   7  -4  -5    8.60    2.90
  -7  -4   5   15.60    2.80
  -7  -4   5   13.60    3.30
   7  -4  -5   11.80    2.50
   7   4  -5   14.70    3.30
  -7   4   5   10.80    3.20
   6  -4  -5    9.10    2.10
   6  -4  -5   12.90    2.80
  -6  -4   5   10.60    2.90
  -6  -4   5   13.00    2.30
  -6   4   5    6.50    2.80
   6   4  -5    8.40    2.70
  -5  -4   5    7.80    2.60
   5  -4  -5    6.60    2.40
   5  -4  -5    7.60    1.70
  -5  -4   5    6.20    1.90
  -5   4   5    8.30    2.70
   5   4  -5    6.40    2.50
  -4  -4   5  175.68    6.70
   4  -4  -5  166.08    6.40
   4  -4  -5  174.28    5.10
  -4  -4   5  172.88    5.30
   4   4  -5  169.48    6.60
  -4   4   5  163.88    6.60
   3  -4  -5    2.10    1.90
  -3  -4   5    2.60    2.00
   3  -4  -5    1.20    1.10
  -3  -4   5   -0.40    1.10
   3   4  -5    3.40    1.80
  -3   4   5   -1.10    1.60
  -2  -4   5   59.19    2.60
   2  -4  -5   65.79    3.70
   2  -4  -5   59.99    2.60
  -2  -4   5   64.39    4.00
   2   4  -5   62.19    3.70
  -2   4   5   65.09    4.10
  -2   4   5   62.89    3.20
   2   4  -5   64.29    2.90
  -1  -4   5    5.00    1.10
  -1  -4   5    4.60    1.80
   1  -4  -5    7.30    1.20
   1  -4  -5    7.30    1.70
   1   4  -5    7.90    1.70
  -1   4   5    8.60    1.90
   1   4  -5    8.70    2.10
  -1   4   5    6.70    1.90
   0  -4  -5    4.90    1.30
   0  -4   5    7.60    1.70
   0   4  -5    4.70    1.70
   0   4   5    4.30    1.80
   0   4  -5    5.00    1.80
   0   4   5    5.90    1.30
   0   4  -5    3.70    1.20
   0   4   5    4.20    1.90
   1  -4   5   -0.20    1.10
  -1  -4  -5   -0.10    1.50
  -1  -4  -5    1.50    0.90
  -1   4  -5    0.30    1.70
  -1   4  -5    0.10    1.60
   1   4   5    0.10    1.20
  -1   4  -5    1.20    1.20
   1   4   5   -0.20    1.70
   2  -4   5  857.81   16.60
  -2  -4  -5  888.11   18.00
   2  -4   5  885.51   17.90
  -2  -4  -5  880.51   16.30
  -2   4  -5  860.81   18.90
   2   4   5  892.41   19.50
   2   4   5  917.41   17.70
  -2   4  -5  891.31   17.50
  -3  -4  -5   10.70    2.10
   3  -4   5   10.70    2.20
  -3   4  -5   10.40    2.60
  -3   4  -5    8.50    1.90
   3   4   5    8.80    1.90
   3   4   5    7.80    2.70
  -4  -4  -5    5.40    2.10
   4  -4   5    7.10    2.10
  -4   4  -5    4.60    1.90
  -4   4  -5    0.60    2.30
   4   4   5    5.60    2.00
   4   4   5    5.90    2.80
   5  -4   5   16.10    2.60
  -5  -4  -5   21.10    2.90
  -5   4  -5   12.80    3.00
   5   4   5    9.90    3.20
   5   4   5   14.50    2.70
  -5   4  -5   11.70    2.40
   6  -4   5   57.79    4.00
  -6  -4  -5   53.59    4.40
   6   4   5   58.39    4.60
  -6   4  -5   45.90    4.80
  -6   4  -5   56.59    4.40
   6   4   5   48.00    5.20
   7  -4   5   18.10    3.20
  -7  -4  -5   17.50    3.00
  -7   4  -5   16.00    3.80
   7   4   5   13.60    3.80
  -7   4  -5   17.80    3.30
   7   4   5   20.80    3.30
  -8  -4  -5  120.69    6.50
   8  -4   5  109.99    6.20
  -8   4  -5  111.09    6.50
   8   4   5  109.89    7.40
   8   4   5  129.69    7.10
  -8   4  -5  112.39    7.30
   8  -5  -5    6.20    3.00
   8  -5  -5    6.10    3.10
  -8  -5   5   10.00    3.40
  -8  -5   5    8.10    2.90
   8   5  -5   11.00    3.70
  -8   5   5    8.50    3.50
  -7  -5   5    5.20    2.50
   7  -5  -5    6.30    2.90
   7  -5  -5    9.30    2.40
  -7  -5   5    8.40    3.20
   7   5  -5   12.80    3.70
  -7   5   5   11.30    3.40
  -6  -5   5   40.80    4.40
   6  -5  -5   45.20    3.60
   6  -5  -5   35.00    4.00
  -6  -5   5   36.70    3.50
  -6   5   5   35.50    4.30
   6   5  -5   53.09    5.20
  -5  -5   5   25.50    3.70
  -5  -5   5   24.70    2.70
   5  -5  -5   29.20    2.70
   5  -5  -5   22.60    3.30
   5   5  -5   28.40    4.00
  -5   5   5   27.00    3.70
  -4  -5   5  106.19    4.30
   4  -5  -5  106.89    5.60
   4  -5  -5  107.79    4.20
  -4  -5   5  122.09    6.10
  -4   5   5  109.79    5.80
   4   5  -5  101.69    5.60
   3  -5  -5    8.90    2.40
   3  -5  -5   10.50    1.70
  -3  -5   5    5.50    2.40
  -3  -5   5    8.20    1.60
   3   5  -5   11.80    2.80
  -3   5   5   12.80    2.80
   2  -5  -5   15.40    2.40
  -2  -5   5   15.10    1.80
  -2  -5   5   13.20    2.50
   2  -5  -5   14.60    1.80
  -2   5   5   14.70    2.30
   2   5  -5   13.30    2.00
  -2   5   5   18.80    3.00
   2   5  -5   20.70    2.90
  -1  -5   5    6.40    2.00
   1  -5  -5    5.10    1.40
   1  -5  -5    5.20    1.80
  -1  -5   5    5.40    1.40
  -1   5   5    3.70    1.90
  -1   5   5    6.10    2.30
   1   5  -5    3.70    1.70
   1   5  -5    1.70    1.70
   0  -5   5   93.79    4.30
   0  -5  -5   97.79    4.00
   0   5  -5   95.79    3.80
   0   5  -5   95.49    4.80
   0   5   5   96.19    5.00
   0   5   5   86.99    3.80
   0   5   5   86.99    4.70
   0   5  -5   95.39    4.80
  -1  -5  -5    4.90    1.90
   1  -5   5    3.60    1.40
  -1  -5  -5    3.90    1.30
  -1   5  -5    6.10    2.30
   1   5   5    4.00    2.20
  -1   5  -5    5.90    1.70
   1   5   5    5.40    1.70
   2  -5   5  265.47    7.70
  -2  -5  -5  261.47    7.60
   2  -5   5  249.48    6.60
  -2   5  -5  260.87    7.30
  -2   5  -5  248.18    8.50
   2   5   5  244.48    8.90
   2   5   5  247.38    7.20
   3  -5   5   -1.10    1.50
  -3  -5  -5   -1.10    1.60
   3   5   5    0.20    2.40
  -3   5  -5   -0.80    1.60
   3   5   5    1.60    1.80
  -3   5  -5   -0.60    2.20
  -4  -5  -5   51.39    4.00
   4  -5   5   53.59    4.00
  -4   5  -5   55.69    4.00
   4   5   5   57.49    4.10
   4   5   5   45.50    4.90
  -4   5  -5   53.49    5.00
  -5  -5  -5   11.80    2.50
   5  -5   5    9.60    2.40
  -5   5  -5   10.30    2.60
  -5   5  -5   14.50    3.30
   5   5   5   10.10    2.70
   5   5   5   13.70    3.70
   6  -5   5  101.29    5.50
  -6  -5  -5  100.49    5.50
   6   5   5  100.09    5.90
  -6   5  -5   96.09    5.70
   6   5   5  105.89    7.40
  -6   5  -5  108.09    7.00
   7  -5   5    2.40    2.40
  -7  -5  -5    1.00    2.60
  -7   5  -5    2.40    3.00
   7   5   5    1.10    2.80
   7   5   5    3.00    3.60
  -7   5  -5    5.30    2.70
   8  -5   5   30.80    4.30
  -8  -5  -5   32.00    4.10
   8   5   5   24.10    4.90
  -8   5  -5   30.50    4.40
   8   5   5   27.50    4.30
  -8   5  -5   26.20    4.70
  -7  -6   5    5.70    3.30
   7  -6  -5    1.70    2.60
   7   6  -5    3.00    2.90
  -7   6   5    7.20    3.40
   6  -6  -5   -0.40    2.50
  -6  -6   5    0.70    2.90
   6   6  -5   -0.30    2.70
  -6   6   5    0.90    2.80
  -5  -6   5   20.20    3.90
   5  -6  -5   15.00    3.20
  -5   6   5   24.40    4.10
   5   6  -5   21.00    4.00
  -4  -6   5  130.29    7.00
   4  -6  -5  148.39    6.80
   4   6  -5  145.09    7.20
  -4   6   5  145.39    7.20
   3  -6  -5   24.50    3.50
  -3  -6   5   17.70    3.10
  -3   6   5   19.70    3.60
   3   6  -5   28.20    3.90
  -2  -6   5   92.19    5.30
   2  -6  -5   85.99    4.80
   2   6  -5   99.39    5.60
  -2   6   5   85.29    5.30
  -1  -6   5  105.69    5.20
   1  -6  -5  103.39    4.80
   1   6  -5  100.29    5.00
  -1   6   5   99.79    5.60
  -1   6   5  113.69    5.60
   1   6  -5  106.19    5.50
   0  -6  -5   34.80    3.00
   0  -6   5   30.20    3.10
   0   6   5   40.70    4.00
   0   6  -5   35.00    3.70
   0   6   5   36.90    4.00
   0   6  -5   30.60    3.40
  -1  -6  -5   15.40    2.50
   1  -6   5   25.00    2.70
   1   6   5   25.60    3.70
  -1   6  -5   18.00    3.10
   2  -6   5  349.17    9.90
  -2  -6  -5  365.96   10.10
  -2   6  -5  352.26   11.10
   2   6   5  402.86   11.20
   2   6   5  364.16   11.70
   3  -6   5   35.80    3.50
  -3  -6  -5   30.90    3.40
   3   6   5   28.50    4.30
   3   6   5   28.10    3.30
  -3   6  -5   31.90    4.20
   4  -6   5   20.20    2.90
  -4  -6  -5   23.20    3.20
   4   6   5   19.50    3.10
   4   6   5   18.80    4.00
  -4   6  -5   17.80    3.70
   5  -6   5   44.00    4.00
  -5  -6  -5   44.10    4.20
  -5   6  -5   46.20    5.20
   5   6   5   44.10    5.80
   5   6   5   48.30    4.50
  -6  -6  -5    5.20    2.70
   6  -6   5    8.20    2.60
  -6   6  -5    9.10    3.70
   6   6   5   17.30    4.50
   6   6   5    6.80    3.10
  -7  -6  -5   12.70    3.30
   7  -6   5   12.60    3.10
  -7   6  -5   18.90    4.30
   7   6   5    9.30    4.30
   6  -7  -5    7.60    3.20
  -6  -7   5    7.20    3.40
   6   7  -5    3.80    3.50
  -6   7   5    7.80    3.40
   5  -7  -5   -1.60    2.50
  -5  -7   5    4.40    3.10
   5   7  -5    3.50    3.10
  -5   7   5    3.40    3.10
  -4  -7   5   39.10    4.80
   4  -7  -5   33.00    4.10
   4   7  -5   32.00    4.60
  -4   7   5   40.00    4.80
   3  -7  -5   70.59    5.10
  -3  -7   5   72.59    5.80
  -3   7   5   78.59    6.00
   3   7  -5   89.09    6.60
   2  -7  -5   34.80    3.70
  -2  -7   5   37.90    4.30
  -2   7   5   31.10    4.10
   2   7  -5   33.00    4.20
   1  -7  -5  159.08    6.40
  -1  -7   5  160.98    6.90
   1   7  -5  153.88    7.20
  -1   7   5  165.48    9.70
  -1   7   5  163.98    7.40
   0  -7   5   43.30    3.90
   0  -7  -5   47.00    3.60
   0   7  -5   41.70    4.20
   0   7  -5   55.19    4.80
   0   7   5   46.80    4.70
   1  -7   5   35.30    3.90
  -1  -7  -5   44.80    4.20
  -1   7  -5   44.10    4.70
   1   7   5   47.40    5.20
  -2  -7  -5  165.98    6.80
   2  -7   5  163.88    6.70
  -2   7  -5  172.18    7.90
   2   7   5  172.38    8.40
  -3  -7  -5   12.00    2.70
   3  -7   5   15.90    3.10
  -3   7  -5   14.50    3.60
   3   7   5   20.70    4.10
  -4  -7  -5   43.50    4.20
   4  -7   5   45.30    4.30
  -4   7  -5   44.10    5.60
   4   7   5   61.09    6.50
   5  -7   5   55.79    4.90
  -5  -7  -5   60.39    5.00
  -5   7  -5   57.19    6.20
   5   7   5   57.39    6.70
   6  -7   5   -0.30    2.30
  -6  -7  -5    0.70    2.60
  -6   7  -5    2.80    3.50
   6   7   5    1.00    3.80
  -5  -8   5   20.30    6.20
   5  -8  -5   25.70    4.40
  -4  -8   5    4.50    3.30
   4  -8  -5    6.00    3.00
   4   8  -5    3.50    3.40
  -4   8   5   -0.40    3.10
   3  -8  -5    9.10    3.00
  -3  -8   5    9.20    3.50
   3   8  -5    8.70    3.50
  -3   8   5   15.90    3.90
  -2  -8   5    7.60    3.20
   2  -8  -5   12.50    2.90
   2   8  -5   18.00    3.90
  -2   8   5   12.00    3.60
   1  -8  -5  239.28    8.30
  -1  -8   5  248.08    9.10
  -1   8   5  203.18    8.90
   1   8  -5  216.68    9.00
   0  -8  -5   30.30    3.90
   0   8  -5   39.80    4.60
   0   8   5   29.80    4.30
   1  -8   5   -2.80    2.20
  -1  -8  -5    3.10    2.30
   1   8   5   -3.10    2.60
  -1   8  -5    2.80    2.80
  -2  -8  -5    3.50    2.30
   2  -8   5   -0.40    2.20
  -2   8  -5   -1.00    2.60
   2   8   5   -1.00    2.90
  -3  -8  -5   72.89    5.20
   3  -8   5   81.19    5.50
  -3   8  -5   77.49    6.70
   3   8   5   80.59    7.30
  -4  -8  -5   16.40    3.30
   4  -8   5   20.40    3.50
   4   8   5   16.70    4.50
  -4   8  -5   11.90    3.80
   2  -9  -5    1.30    2.40
  -2  -9   5    0.90    3.00
   2   9  -5   -2.30    2.60
   1   9  -5   30.30    4.50
   0  -9   5   -0.20    2.70
   0  -9  -5    1.60    2.50
  -1  -9  -5   38.30    4.50
   1  -9   5   53.49    5.00
   1   9   5   42.90    5.50
 -10   0   6   46.80    5.30
  10   0  -6   59.79    5.90
  -9   0   6   16.80    3.50
   9   0  -6   17.40    3.50
   8   0  -6    8.70    2.90
  -8   0   6    7.00    2.50
  -7   0   6   16.40    2.80
   7   0  -6   23.90    3.10
   6   0  -6 1025.70   19.70
  -6   0   6 1011.40   21.00
   6   0  -6 1032.90   21.00
  -5   0   6   27.80    2.80
   5   0  -6   25.40    2.10
  -5   0   6   23.00    1.90
   5   0  -6   17.20    2.10
  -4   0   6  190.08    4.80
   4   0  -6  196.28    5.50
   4   0  -6  188.18    4.90
  -4   0   6  189.38    5.40
  -3   0   6    5.60    1.10
   3   0  -6    6.20    1.20
  -3   0   6    5.60    1.30
   3   0  -6    6.50    1.30
  -2   0   6 1255.47   22.30
   2   0  -6 1238.78   22.30
  -2   0   6 1262.07   22.40
   2   0  -6 1226.08   22.20
   1   0  -6    2.00    0.90
  -1   0   6    1.70    0.90
  -1   0   6    4.40    1.00
   1   0  -6    4.20    1.00
   0   0   6 4089.09   69.99
   0   0  -6 4012.20   70.49
   0   0  -6 4087.49   69.59
   0   0   6 3950.10   68.99
   1   0   6    4.10    0.90
  -1   0  -6    2.50    0.80
   1   0   6    1.40    1.00
  -1   0  -6    2.90    1.00
  -2   0  -6  344.17    7.30
   2   0   6  335.37    7.40
   2   0   6  350.16    7.10
  -2   0  -6  335.37    7.10
  -3   0  -6   10.60    1.60
  -3   0  -6   11.20    1.40
   3   0   6   13.50    1.70
   3   0   6   10.40    1.40
   4   0   6   -0.70    1.20
  -4   0  -6    3.10    1.40
   4   0   6    1.60    1.20
  -4   0  -6   -0.10    1.20
   5   0   6    3.30    1.50
   5   0   6    1.20    1.50
  -5   0  -6    2.90    1.50
  -5   0  -6    4.10    1.60
   6   0   6   14.80    2.40
  -6   0  -6   13.10    2.30
  -7   0  -6   -0.50    1.70
   7   0   6    5.20    2.20
  -8   0  -6   35.40    4.10
   8   0   6   28.50    3.70
   9   0   6   -1.30    2.10
  -9   0  -6    1.60    2.40
  -9  -1   6    3.70    2.80
   9  -1  -6    1.50    2.40
   9   1  -6   -2.30    2.60
  -9   1   6    0.70    2.60
  -8  -1   6   38.70    4.30
   8  -1  -6   34.10    4.00
   8   1  -6   38.80    4.30
  -8   1   6   46.60    4.70
   7  -1  -6   -1.50    1.40
   7  -1  -6   -0.30    1.90
  -7  -1   6   -2.00    1.80
   7   1  -6   -0.30    1.90
  -7   1   6   -3.60    1.80
  -6  -1   6    6.60    2.00
   6  -1  -6    9.40    1.90
  -6  -1   6    9.80    1.90
   6  -1  -6    9.10    1.90
   6   1  -6    9.60    2.10
  -6   1   6    3.30    2.10
   5  -1  -6   60.19    3.30
  -5  -1   6   69.89    3.50
  -5  -1   6   58.59    3.20
   5   1  -6   64.69    2.40
   5   1  -6   62.49    3.50
  -5   1   6   69.09    3.90
  -5   1   6   57.59    2.20
   4  -1  -6   67.99    3.00
   4  -1  -6   64.59    3.10
  -4  -1   6   66.69    3.00
  -4  -1   6   67.29    3.10
   4   1  -6   68.09    2.30
  -4   1   6   63.29    2.20
   4   1  -6   60.89    3.40
   3  -1  -6  288.57    6.90
  -3  -1   6  287.57    6.80
  -3  -1   6  298.07    6.50
   3  -1  -6  298.27    6.50
   3   1  -6  297.17    6.10
  -3   1   6  285.67    7.10
   3   1  -6  309.87    7.20
  -3   1   6  294.27    6.10
   2  -1  -6 1082.59   19.20
   2  -1  -6 1070.39   19.90
  -2  -1   6 1084.99   19.90
  -2  -1   6 1082.19   19.30
   2   1  -6 1085.19   20.10
  -2   1   6 1073.19   20.10
  -2   1   6 1084.49   19.30
   2   1  -6 1075.99   19.20
  -1  -1   6   79.39    1.90
   1  -1  -6   78.29    1.80
   1   1  -6   81.99    2.50
   1   1  -6   79.09    3.00
  -1   1   6   78.59    2.60
  -1   1   6   81.09    3.00
   0  -1  -6  139.99    3.50
   0  -1   6  143.49    3.60
   0   1   6  145.09    4.00
   0   1  -6  144.59    3.80
   0   1  -6  146.09    4.00
   0   1   6  142.99    4.10
   1  -1   6   76.19    2.40
   1  -1   6   77.89    2.80
  -1  -1  -6   75.59    2.30
  -1  -1  -6   83.69    2.80
   1   1   6   82.09    2.20
  -1   1  -6   79.69    2.10
  -1   1  -6   79.89    3.00
   1   1   6   77.29    3.20
  -2  -1  -6 1059.59   18.80
  -2  -1  -6 1033.90   19.30
   2  -1   6 1039.60   18.70
   2  -1   6 1024.50   19.20
   2   1   6 1061.19   19.90
  -2   1  -6 1046.00   19.70
  -2   1  -6 1053.59   18.90
   2   1   6 1025.00   18.90
   3  -1   6   45.00    2.20
  -3  -1  -6   48.40    2.60
  -3  -1  -6   44.00    2.10
   3  -1   6   42.80    2.50
   3   1   6   42.20    3.00
  -3   1  -6   43.40    2.90
   3   1   6   47.00    2.30
  -3   1  -6   49.80    2.30
   4  -1   6  123.29    4.30
  -4  -1  -6  122.19    4.40
  -4  -1  -6  126.89    3.80
   4  -1   6  128.39    3.80
  -4   1  -6  125.49    4.20
  -4   1  -6  127.59    4.90
   4   1   6  120.79    4.80
   4   1   6  122.29    4.20
  -5  -1  -6    1.20    1.50
   5  -1   6    3.70    1.70
   5   1   6    2.50    1.80
   5   1   6    2.80    1.60
  -5   1  -6    2.70    1.40
  -5   1  -6    3.50    1.70
   6  -1   6  340.57    9.20
  -6  -1  -6  345.47    9.30
   6   1   6  350.76    9.30
  -6   1  -6  353.46    9.40
  -6   1  -6  353.06    9.60
   6   1   6  347.57    9.70
  -7  -1  -6    5.70    2.40
   7  -1   6    7.10    2.30
   7   1   6   13.10    2.70
  -7   1  -6    4.00    1.90
   8  -1   6  126.39    6.10
  -8  -1  -6  142.29    6.50
   8   1   6  128.59    6.30
  -8   1  -6  130.79    6.40
   9  -1   6   -2.50    2.30
  -9  -1  -6   -1.90    2.10
   9   1   6   -2.40    2.40
  -9   1  -6   -0.70    2.40
   9  -2  -6    5.90    2.90
  -9  -2   6    6.90    3.00
   9   2  -6   13.90    3.70
  -9   2   6    3.70    3.20
  -8  -2   6   14.10    2.90
   8  -2  -6   12.00    2.70
  -8   2   6    4.40    2.80
   8   2  -6    5.20    3.20
  -7  -2   6  128.19    5.70
   7  -2  -6  144.99    5.80
   7  -2  -6  126.79    5.50
  -7  -2   6  129.99    5.60
  -7   2   6  119.99    6.00
   7   2  -6  129.89    6.40
   6  -2  -6  197.78    6.80
   6  -2  -6  218.68    6.60
  -6  -2   6  217.68    6.90
  -6  -2   6  204.98    6.50
  -6   2   6  213.48    7.50
   6   2  -6  206.48    7.40
   5  -2  -6  280.67    7.90
  -5  -2   6  291.37    7.40
  -5  -2   6  275.37    7.90
   5  -2  -6  277.87    7.20
   5   2  -6  282.77    8.20
  -5   2   6  294.87    8.40
  -4  -2   6   13.90    1.60
  -4  -2   6   19.30    2.40
   4  -2  -6   12.70    1.90
   4  -2  -6   20.30    1.80
  -4   2   6   17.20    2.50
   4   2  -6   16.80    1.20
   4   2  -6   12.90    2.10
  -4   2   6   18.60    1.30
   3  -2  -6   48.20    2.10
   3  -2  -6   43.00    2.80
  -3  -2   6   44.60    2.20
  -3  -2   6   41.00    2.90
  -3   2   6   42.40    1.90
   3   2  -6   40.20    3.00
   3   2  -6   42.30    1.70
  -3   2   6   38.60    2.80
  -2  -2   6  203.98    4.50
   2  -2  -6  200.08    4.30
   2  -2  -6  188.08    5.30
  -2  -2   6  202.48    5.50
   2   2  -6  206.28    4.70
  -2   2   6  197.28    4.80
   2   2  -6  203.18    5.70
  -2   2   6  206.58    5.80
   1  -2  -6   20.00    1.70
  -1  -2   6   16.60    1.60
   1  -2  -6   21.20    1.00
  -1  -2   6   18.30    1.00
   1   2  -6   24.40    2.30
  -1   2   6   22.80    2.10
   1   2  -6   17.40    1.60
  -1   2   6   21.30    1.90
   0  -2   6  245.88    5.60
   0  -2  -6  241.88    5.40
   0   2   6  242.68    4.70
   0   2  -6  241.48    6.20
   0   2  -6  244.68    5.90
   0   2   6  230.78    6.10
   0   2  -6  229.78    4.60
   0   2   6  229.08    6.00
  -1  -2  -6   21.40    2.00
   1  -2   6   19.90    1.50
  -1  -2  -6   19.10    1.40
   1  -2   6   18.60    1.80
   1   2   6   21.20    1.50
  -1   2  -6   19.80    1.40
   1   2   6   21.90    2.30
  -1   2  -6   19.10    2.10
   2  -2   6   84.79    2.40
  -2  -2  -6   79.19    2.20
   2  -2   6   74.69    3.30
  -2  -2  -6   75.79    3.10
   2   2   6   76.99    3.90
  -2   2  -6   82.79    2.70
  -2   2  -6   73.09    3.70
   2   2   6   76.99    2.70
   3  -2   6  196.48    4.30
  -3  -2  -6  197.08    5.50
   3  -2   6  184.88    5.50
  -3  -2  -6  194.78    4.30
   3   2   6  187.98    6.40
  -3   2  -6  197.18    6.20
  -3   2  -6  196.78    5.20
   3   2   6  189.78    5.20
  -4  -2  -6   86.99    3.70
   4  -2   6   95.89    4.00
  -4   2  -6   99.19    4.70
  -4   2  -6   88.59    3.70
   4   2   6   86.59    4.60
   4   2   6   92.89    3.90
   5  -2   6    1.70    1.70
  -5  -2  -6    0.80    1.70
  -5   2  -6    2.40    1.60
   5   2   6    1.10    1.60
  -5   2  -6    3.60    2.10
   5   2   6   -0.90    1.90
  -6  -2  -6   45.70    3.50
   6  -2   6   43.30    3.60
   6   2   6   49.00    4.30
  -6   2  -6   42.10    4.00
   6   2   6   50.99    4.10
  -6   2  -6   46.80    3.80
  -7  -2  -6   37.90    3.90
   7  -2   6   33.40    3.70
   7   2   6   42.00    4.20
  -7   2  -6   32.70    3.70
  -7   2  -6   38.50    4.10
  -8  -2  -6   23.70    3.60
   8  -2   6   23.60    3.70
  -8   2  -6   19.80    3.30
   8   2   6   17.50    3.40
  -9  -2  -6   35.50    4.30
   9  -2   6   22.10    3.70
   9   2   6   25.10    4.20
  -9   2  -6   24.70    3.80
  -9  -3   6   14.90    3.40
   9  -3  -6   14.80    3.30
  -9   3   6    8.50    3.40
   9   3  -6    8.80    3.70
   8  -3  -6   10.30    2.70
  -8  -3   6   10.90    2.90
   8  -3  -6    7.30    2.70
  -8   3   6    6.40    3.00
   8   3  -6    9.70    3.40
   7  -3  -6   50.29    3.80
   7  -3  -6   43.50    4.20
  -7  -3   6   37.30    3.50
  -7  -3   6   40.60    4.00
  -7   3   6   37.40    4.50
   7   3  -6   47.50    4.70
  -6  -3   6    8.80    2.20
  -6  -3   6    3.60    2.20
   6  -3  -6    2.40    2.00
   6  -3  -6    8.70    1.90
  -6   3   6    5.60    2.50
   6   3  -6    5.10    2.50
  -5  -3   6  134.29    5.60
  -5  -3   6  125.19    4.60
   5  -3  -6  124.99    4.40
   5  -3  -6  124.39    5.40
  -5   3   6  127.39    5.80
   5   3  -6  125.19    5.70
   4  -3  -6   23.50    2.70
   4  -3  -6   29.30    2.20
  -4  -3   6   29.00    2.30
  -4  -3   6   31.90    3.00
  -4   3   6   28.60    3.20
   4   3  -6   27.70    3.20
  -3  -3   6  185.68    4.80
   3  -3  -6  183.38    4.70
  -3  -3   6  185.68    6.00
   3  -3  -6  193.08    6.00
   3   3  -6  183.48    6.20
  -3   3   6  194.28    6.30
  -3   3   6  183.38    4.80
   3   3  -6  184.58    4.50
   2  -3  -6   74.09    3.50
  -2  -3   6   68.69    3.40
  -2  -3   6   65.59    2.40
   2  -3  -6   72.59    2.40
  -2   3   6   73.39    3.10
   2   3  -6   71.69    3.80
   2   3  -6   75.19    2.80
  -2   3   6   71.89    3.90
  -1  -3   6  778.32   15.30
   1  -3  -6  753.12   15.00
   1  -3  -6  767.02   13.80
  -1  -3   6  735.83   13.70
   1   3  -6  761.52   14.90
   1   3  -6  756.12   15.60
  -1   3   6  732.93   15.60
  -1   3   6  756.42   15.20
   0  -3  -6  462.95    9.50
   0  -3   6  458.05    9.80
   0   3   6  465.35   10.60
   0   3   6  462.75   10.60
   0   3  -6  464.85    9.00
   0   3   6  453.65    9.00
   0   3  -6  453.25   10.20
   0   3  -6  447.26   10.40
  -1  -3  -6  852.01   15.50
  -1  -3  -6  845.12   16.60
   1  -3   6  840.62   15.70
   1   3   6  808.42   17.30
   1   3   6  820.32   15.60
  -1   3  -6  846.72   15.60
  -1   3  -6  803.92   16.90
   2  -3   6    2.60    0.80
  -2  -3  -6    0.70    0.70
  -2  -3  -6    2.90    1.60
   2  -3   6    1.00    1.30
   2   3   6    1.40    1.70
  -2   3  -6    2.80    1.80
  -2   3  -6    0.60    1.10
   2   3   6    1.60    1.10
   3  -3   6   91.29    4.00
   3  -3   6   83.39    2.40
  -3  -3  -6   90.59    3.80
  -3  -3  -6   90.39    2.40
  -3   3  -6   89.99    4.70
   3   3   6   85.79    4.90
   3   3   6   87.79    3.70
  -3   3  -6   87.49    3.60
   4  -3   6   69.59    3.80
  -4  -3  -6   65.49    3.60
   4   3   6   62.39    3.60
   4   3   6   59.99    4.60
  -4   3  -6   64.59    4.40
  -4   3  -6   64.49    3.50
  -5  -3  -6   46.10    3.40
   5  -3   6   48.20    3.40
   5   3   6   43.40    3.60
  -5   3  -6   51.29    3.80
  -5   3  -6   63.49    4.90
   5   3   6   48.50    4.50
   6  -3   6  142.29    5.80
  -6  -3  -6  137.59    5.70
  -6   3  -6  131.69    6.60
   6   3   6  135.79    6.90
  -6   3  -6  151.28    6.10
   6   3   6  133.89    6.00
  -7  -3  -6  112.19    5.50
   7  -3   6  101.19    5.30
  -7   3  -6  101.29    6.10
  -7   3  -6   99.49    5.60
   7   3   6  107.99    5.80
   7   3   6  106.39    6.70
  -8  -3  -6   38.70    4.30
   8  -3   6   28.30    3.60
  -8   3  -6   40.90    4.80
  -8   3  -6   32.30    4.00
   8   3   6   37.60    4.40
  -9  -3  -6   30.00    6.00
   9  -3   6   23.60    4.90
   9   3   6   29.20    4.60
  -9   3  -6   28.10    4.10
  -9  -4   6    4.20    2.80
   9  -4  -6    1.90    2.50
   9  -4  -6    5.00    2.60
  -9   4   6   -3.50    2.80
   9   4  -6    2.40    3.80
  -8  -4   6    7.10    3.10
  -8  -4   6    6.20    2.70
   8  -4  -6    8.40    2.60
   8  -4  -6    8.00    2.90
   8   4  -6   12.80    3.80
  -8   4   6    4.70    3.10
   7  -4  -6   48.40    4.70
   7  -4  -6   43.10    3.70
  -7  -4   6   34.10    4.20
  -7  -4   6   50.89    4.20
  -7   4   6   45.90    5.10
   7   4  -6   52.69    5.20
  -6  -4   6   21.10    2.80
  -6  -4   6   15.50    3.20
   6  -4  -6   18.40    3.20
   6  -4  -6   17.30    2.40
   6   4  -6   16.50    3.40
  -6   4   6   20.70    3.70
   5  -4  -6  216.18    6.30
  -5  -4   6  230.18    6.50
   5  -4  -6  227.98    7.80
  -5  -4   6  206.68    7.70
   5   4  -6  211.68    7.70
  -5   4   6  218.38    8.00
   4  -4  -6    5.70    1.40
   4  -4  -6    5.20    2.10
  -4  -4   6    4.80    1.50
  -4  -4   6   10.70    2.50
   4   4  -6    7.30    2.40
  -4   4   6   10.80    2.40
   3  -4  -6  176.68    4.80
  -3  -4   6  175.08    6.20
   3  -4  -6  188.48    6.30
  -3  -4   6  184.28    5.00
  -3   4   6  179.48    6.60
   3   4  -6  174.88    6.30
  -3   4   6  177.68    5.20
   2  -4  -6    7.20    1.90
   2  -4  -6    7.10    1.20
  -2  -4   6    5.90    1.10
  -2  -4   6    6.40    2.00
   2   4  -6    1.90    1.70
  -2   4   6    4.50    2.10
  -2   4   6    5.30    1.60
   2   4  -6    7.20    1.50
   1  -4  -6  123.39    3.60
   1  -4  -6  134.09    4.60
  -1  -4   6  121.69    3.50
  -1  -4   6  133.09    4.90
  -1   4   6  128.69    4.90
   1   4  -6  114.89    5.00
  -1   4   6  126.19    5.20
   1   4  -6  123.79    4.60
   0  -4  -6    0.50    1.10
   0  -4   6    3.10    1.40
   0   4  -6    1.70    1.00
   0   4   6    2.80    1.70
   0   4   6    2.10    1.80
   0   4  -6    0.40    1.80
   0   4  -6    2.60    1.60
   0   4   6    1.30    1.10
  -1  -4  -6  193.48    5.00
  -1  -4  -6  208.08    6.20
   1  -4   6  188.98    5.30
  -1   4  -6  191.38    6.50
  -1   4  -6  187.98    6.10
  -1   4  -6  196.88    5.30
   1   4   6  200.18    5.40
   1   4   6  188.48    6.80
   2  -4   6   10.40    2.10
  -2  -4  -6   14.40    1.30
  -2  -4  -6   15.40    2.30
   2  -4   6   14.20    1.50
   2   4   6   15.10    1.90
  -2   4  -6   10.90    2.50
   2   4   6   14.60    2.80
  -2   4  -6   13.00    1.80
  -3  -4  -6  198.28    6.40
   3  -4   6  192.08    6.30
  -3   4  -6  191.88    7.20
   3   4   6  197.68    7.70
  -3   4  -6  210.68    6.10
   3   4   6  202.58    6.20
  -4  -4  -6    9.40    2.10
   4  -4   6    6.10    2.10
  -4   4  -6    6.30    1.90
   4   4   6    0.70    2.40
   4   4   6    5.60    2.00
  -4   4  -6    3.30    2.40
  -5  -4  -6   60.29    3.90
   5  -4   6   57.99    4.10
  -5   4  -6   53.29    4.80
   5   4   6   61.29    5.40
   5   4   6   48.70    3.90
  -5   4  -6   60.89    4.00
   6  -4   6    7.00    2.50
  -6  -4  -6    4.60    2.20
  -6   4  -6    4.50    3.00
  -6   4  -6    2.50    2.00
   6   4   6    7.50    2.50
   6   4   6    3.70    3.10
   7  -4   6   22.00    3.40
  -7  -4  -6   22.90    3.50
  -7   4  -6   15.50    3.80
  -7   4  -6   18.90    3.40
   7   4   6   22.40    3.60
   7   4   6   19.40    4.30
   8  -4   6    1.90    2.50
  -8  -4  -6    3.90    2.70
  -8   4  -6    1.30    3.00
   8   4   6   -1.10    3.40
  -8   4  -6    1.90    2.40
   8   4   6    8.40    3.00
   8  -5  -6    4.20    2.70
  -8  -5   6    7.10    2.90
  -8  -5   6    4.70    3.10
  -8   5   6    8.10    3.40
   8   5  -6    2.40    3.30
  -7  -5   6    4.30    3.00
  -7  -5   6   -0.40    2.10
   7  -5  -6    1.30    2.50
  -7   5   6    0.10    2.70
   7   5  -6   -2.00    2.80
  -6  -5   6    7.10    2.20
   6  -5  -6   11.70    3.10
  -6  -5   6    8.60    3.10
   6  -5  -6   10.80    2.30
   6   5  -6    9.20    3.40
  -6   5   6    8.40    3.00
   5  -5  -6   86.29    4.10
   5  -5  -6   99.39    5.60
  -5  -5   6   97.89    4.50
  -5  -5   6  110.49    6.10
  -5   5   6   98.89    6.00
   5   5  -6  104.29    6.20
   4  -5  -6   17.60    2.00
  -4  -5   6   17.00    2.10
  -4  -5   6   19.60    3.20
   4  -5  -6   17.80    3.10
  -4   5   6   15.20    2.90
   4   5  -6   18.20    3.30
   3  -5  -6  140.89    4.50
  -3  -5   6  147.49    6.30
  -3  -5   6  147.19    4.60
   3  -5  -6  153.48    6.10
  -3   5   6  154.68    6.40
   3   5  -6  142.19    6.20
   2  -5  -6    3.70    1.90
  -2  -5   6    6.40    2.10
  -2  -5   6    2.60    1.20
   2  -5  -6    5.40    1.30
  -2   5   6    3.90    1.80
  -2   5   6    5.40    2.20
   2   5  -6    3.80    1.60
   2   5  -6    5.60    2.30
   1  -5  -6   67.39    3.70
   1  -5  -6   65.09    2.90
  -1  -5   6   66.59    2.90
  -1  -5   6   61.99    3.90
  -1   5   6   55.49    4.20
  -1   5   6   71.59    4.20
   1   5  -6   69.89    3.90
   1   5  -6   56.29    4.10
   0  -5  -6    3.70    1.50
   0  -5   6    3.50    1.60
   0   5   6    4.70    2.20
   0   5   6    6.10    2.00
   0   5  -6    5.00    1.40
   0   5  -6    4.10    2.20
   0   5  -6    6.70    2.10
   0   5   6    7.40    1.50
  -1  -5  -6  180.88    5.20
   1  -5   6  181.58    5.60
  -1  -5  -6  185.78    6.30
  -1   5  -6  188.88    5.60
  -1   5  -6  184.28    7.00
   1   5   6  195.88    5.70
   1   5   6  184.38    7.30
   2  -5   6    0.20    1.70
  -2  -5  -6   -0.30    1.70
   2  -5   6    0.20    1.60
  -2   5  -6    2.00    2.20
  -2   5  -6   -0.20    1.50
   2   5   6    1.30    2.10
   2   5   6   -1.90    1.40
  -3  -5  -6    2.20    1.90
   3  -5   6    1.70    2.00
   3   5   6    2.80    1.80
  -3   5  -6   -0.80    2.30
  -3   5  -6    2.70    1.70
   3   5   6   -0.50    2.20
  -4  -5  -6    5.40    2.20
   4  -5   6    8.80    2.30
   4   5   6    5.80    2.20
   4   5   6   11.00    3.20
  -4   5  -6    9.40    2.30
  -4   5  -6    6.80    3.00
   5  -5   6   37.60    3.70
  -5  -5  -6   34.00    3.70
  -5   5  -6   37.90    4.60
   5   5   6   32.40    3.50
  -5   5  -6   28.40    3.40
   5   5   6   45.40    5.30
  -6  -5  -6    9.60    2.80
   6  -5   6    8.00    2.70
   6   5   6   12.20    3.90
  -6   5  -6   12.70    3.70
  -6   5  -6   11.70    2.70
   6   5   6    8.80    3.00
   7  -5   6    6.70    2.70
  -7  -5  -6   12.20    3.20
  -7   5  -6   12.60    4.40
  -7   5  -6    1.80    3.20
   7   5   6    5.30    3.00
   7   5   6    3.40    3.60
  -7  -6   6   21.20    4.00
   7  -6  -6   24.90    4.10
   7   6  -6   20.10    4.40
  -7   6   6   26.50    4.80
  -6  -6   6   11.40    3.60
   6  -6  -6    7.90    3.00
  -6   6   6    7.90    3.30
   6   6  -6    8.30    3.40
   5  -6  -6   57.49    5.10
  -5  -6   6   52.79    5.20
   5   6  -6   51.79    5.10
  -5   6   6   50.29    5.20
  -4  -6   6   20.40    3.50
   4  -6  -6   22.40    3.40
   4   6  -6   31.00    4.40
  -4   6   6   20.50    3.80
   3  -6  -6   24.40    3.40
  -3  -6   6   25.80    3.40
  -3   6   6   29.60    3.90
   3   6  -6   29.00    3.90
  -2  -6   6   54.39    4.60
   2  -6  -6   41.00    3.80
   2   6  -6   50.19    4.70
  -2   6   6   56.79    4.90
  -1  -6   6  466.35   11.90
   1  -6  -6  434.56   11.20
   1   6  -6  447.16   12.30
  -1   6   6  459.85   12.40
   1   6  -6  466.85   11.70
  -1   6   6  469.45   12.40
   0  -6  -6    7.30    1.80
   0  -6   6   10.20    2.30
   0   6  -6    6.40    2.30
   0   6  -6    7.10    2.30
   0   6   6    9.40    2.50
   0   6   6    8.80    2.70
   1  -6   6    7.80    1.90
  -1  -6  -6    7.50    2.30
   1   6   6    9.30    3.00
  -1   6  -6   10.20    2.90
   2  -6   6   77.59    4.70
  -2  -6  -6   72.39    4.50
   2   6   6   84.29    6.00
  -2   6  -6   79.39    5.50
   3  -6   6   32.50    3.50
  -3  -6  -6   32.70    3.60
  -3   6  -6   38.80    4.60
   3   6   6   32.40    4.50
   4  -6   6    9.30    2.50
  -4  -6  -6    9.90    2.80
   4   6   6   10.70    3.80
  -4   6  -6   12.80    3.50
  -5  -6  -6   54.59    4.70
   5  -6   6   50.99    4.40
   5   6   6   52.49    5.70
  -5   6  -6   43.10    5.40
   6  -6   6    5.50    2.50
  -6  -6  -6    4.50    2.60
  -6   6  -6    0.30    3.10
   6   6   6    8.40    3.90
   7  -6   6   31.50    4.20
  -7  -6  -6   30.30    4.20
  -7   6  -6   26.10    4.90
   7   6   6   36.90    5.70
  -6  -7   6   31.10    4.80
   6  -7  -6   22.40    4.00
   6   7  -6   26.70    4.80
  -6   7   6   23.40    4.40
  -5  -7   6   16.60    3.70
   5  -7  -6   10.10    3.20
  -5   7   6   13.40    3.90
   5   7  -6   12.90    3.80
  -4  -7   6   44.50    5.00
   4  -7  -6   38.20    4.50
  -4   7   6   50.29    5.50
   4   7  -6   46.40    5.20
  -3  -7   6    0.40    2.60
   3  -7  -6   -0.50    2.20
  -3   7   6    2.70    2.90
   3   7  -6    1.20    2.70
  -2  -7   6   13.80    3.20
   2  -7  -6   12.30    2.70
   2   7  -6    7.50    3.00
  -2   7   6   11.30    3.20
   1  -7  -6  105.39    5.10
  -1  -7   6   99.79    5.60
  -1   7   6  109.79    6.20
   1   7  -6  116.99    6.40
  -1   7   6  109.39    6.30
   0  -7  -6   10.00    2.40
   0  -7   6   11.10    2.40
   0   7  -6    7.70    2.70
   0   7  -6   16.40    3.10
   0   7   6   13.10    3.30
  -1  -7  -6  112.69    5.80
   1  -7   6  107.19    5.80
  -1   7  -6  121.99    6.70
   1   7   6  109.29    6.80
   2  -7   6   90.09    5.30
  -2  -7  -6   89.39    5.30
  -2   7  -6   88.99    6.10
   2   7   6   82.49    6.50
   3  -7   6    0.20    2.20
  -3  -7  -6    4.80    2.50
   3   7   6   11.40    3.80
  -3   7  -6    3.10    3.30
   4  -7   6   99.79    5.80
  -4  -7  -6   95.09    5.70
   4   7   6  107.29    7.90
  -4   7  -6  107.49    7.20
  -5  -7  -6   13.60    3.20
   5  -7   6    9.70    2.90
  -5   7  -6    9.40    3.90
   5   7   6    9.30    4.10
  -6  -7  -6   -1.70    2.60
   6  -7   6    1.60    2.50
   6   7   6    5.10    4.30
  -6   7  -6   -1.80    5.20
   4  -8  -6    0.10    2.50
  -4  -8   6    4.40    3.50
   4   8  -6    0.60    3.20
  -4   8   6   -2.40    2.90
  -3  -8   6   -1.30    2.80
   3  -8  -6   -0.30    2.30
   3   8  -6    3.70    3.10
  -3   8   6    2.70    2.90
   2  -8  -6   30.30    3.80
  -2  -8   6   31.90    4.40
   2   8  -6   38.00    4.90
  -2   8   6   22.00    4.20
  -1  -8   6   30.90    4.10
   1  -8  -6   31.20    3.60
  -1   8   6   42.60    4.70
   1   8  -6   41.40    4.90
   0  -8  -6   39.10    4.30
   0   8   6   41.10    4.90
   0   8  -6   42.90    4.80
   1  -8   6    8.60    3.00
  -1  -8  -6    3.30    2.60
  -1   8  -6    7.30    3.20
   1   8   6   10.70    3.60
  -2  -8  -6   27.90    3.70
   2  -8   6   26.70    3.80
   2   8   6   21.90    4.40
  -2   8  -6   37.00    5.00
   3  -8   6    8.30    2.90
  -3  -8  -6   13.20    3.20
   3   8   6   22.90    4.60
  -3   8  -6   11.60    3.60
   4  -8   6    7.70    3.00
  -4  -8  -6    5.90    2.90
  -4   8  -6    1.10    3.10
   4   8   6    5.20    3.60
   1   9  -6    1.40    2.80
   0  -9  -6   80.59    6.00
   0  -9   6   82.59    6.10
  -1  -9  -6   -0.20    2.40
   1  -9   6   -0.40    2.50
   1   9   6   -2.70    2.80
  10   0  -7    4.60    3.20
 -10   0   7    4.60    3.20
   9   0  -7   19.30    3.40
  -9   0   7   30.50    4.30
  -8   0   7   -0.50    2.00
   8   0  -7    0.00    2.30
   7   0  -7   50.89    4.20
  -7   0   7   49.50    4.20
  -6   0   7   11.50    2.40
   6   0  -7    9.50    2.10
   6   0  -7   12.60    1.80
  -5   0   7   12.20    1.50
   5   0  -7    9.60    1.50
   5   0  -7    7.20    1.70
  -5   0   7    8.20    2.00
  -4   0   7    8.90    1.30
  -4   0   7    8.80    1.80
   4   0  -7    7.00    1.30
   4   0  -7    6.00    1.50
  -3   0   7  681.83   13.40
  -3   0   7  671.63   13.00
   3   0  -7  676.83   13.30
   3   0  -7  675.63   13.00
  -2   0   7    7.10    1.20
  -2   0   7    7.20    1.10
   2   0  -7    4.70    1.00
   2   0  -7    8.40    1.20
   1   0  -7   92.79    2.80
  -1   0   7   95.09    2.70
  -1   0   7   93.69    2.90
   1   0  -7   87.69    2.60
   0   0  -7   13.70    1.20
   0   0   7   15.60    1.20
   0   0   7   11.70    1.20
   0   0  -7   14.40    1.20
  -1   0  -7  626.34   11.80
   1   0   7  613.74   11.40
  -1   0  -7  622.74   11.40
   1   0   7  592.74   11.80
   2   0   7   55.19    2.60
  -2   0  -7   49.10    2.20
  -2   0  -7   54.19    2.50
   2   0   7   50.29    2.20
   3   0   7  174.68    5.00
  -3   0  -7  171.98    4.70
  -3   0  -7  164.98    4.80
   3   0   7  169.78    4.60
   4   0   7   16.70    1.90
  -4   0  -7   17.60    2.00
   4   0   7   15.60    2.10
  -4   0  -7   16.20    2.00
  -5   0  -7   41.00    3.10
   5   0   7   45.10    3.10
   5   0   7   40.60    3.10
  -5   0  -7   40.40    3.10
  -6   0  -7   16.30    2.50
   6   0   7   18.60    2.50
   7   0   7   53.29    3.90
  -7   0  -7   59.39    4.60
  -8   0  -7    4.20    2.20
   8   0   7   -2.00    2.20
   9   0   7    8.70    3.10
  -9   0  -7    7.20    2.80
  -9  -1   7    4.30    2.90
   9  -1  -7    1.20    2.40
   9   1  -7    3.70    2.80
  -9   1   7    2.90    3.00
   8  -1  -7    3.10    2.20
  -8  -1   7    2.90    2.60
   8   1  -7   10.00    3.00
  -8   1   7    2.90    2.70
   7  -1  -7   38.80    3.70
  -7  -1   7   39.20    3.70
   7  -1  -7   36.40    3.20
   7   1  -7   40.40    4.10
  -7   1   7   34.60    3.60
   6  -1  -7    5.60    1.70
  -6  -1   7    5.90    1.70
  -6  -1   7    3.40    1.90
   6  -1  -7    5.20    1.90
   6   1  -7    0.10    1.60
  -6   1   7    7.20    2.30
   5  -1  -7  283.47    7.40
  -5  -1   7  293.87    7.50
   5  -1  -7  290.97    7.40
  -5  -1   7  284.87    7.30
   5   1  -7  284.27    6.40
   5   1  -7  300.47    8.10
  -5   1   7  277.87    7.90
  -5   1   7  277.37    6.20
  -4  -1   7  121.09    4.00
   4  -1  -7  117.99    3.90
   4  -1  -7  121.49    4.10
  -4  -1   7  123.29    4.10
   4   1  -7  121.19    4.40
   4   1  -7  120.19    3.30
  -4   1   7  125.59    4.70
  -4   1   7  119.29    3.30
   3  -1  -7 1573.04   28.30
  -3  -1   7 1573.34   28.40
   3  -1  -7 1550.64   28.80
  -3  -1   7 1542.25   28.80
  -3   1   7 1631.64   29.30
   3   1  -7 1631.94   29.20
   3   1  -7 1595.24   28.00
  -3   1   7 1582.84   28.00
  -2  -1   7    0.60    0.80
   2  -1  -7    0.90    1.10
  -2  -1   7    0.50    1.10
   2  -1  -7    0.20    0.70
  -2   1   7    1.50    0.80
   2   1  -7    1.30    0.80
   2   1  -7    1.20    1.20
  -2   1   7    2.10    1.30
   1  -1  -7   79.19    1.90
  -1  -1   7   83.69    2.00
   1  -1  -7   79.69    2.80
  -1  -1   7   83.99    2.90
  -1   1   7   81.09    3.20
   1   1  -7   80.09    2.60
  -1   1   7   84.39    2.80
   1   1  -7   76.09    2.90
   0  -1   7  124.39    3.50
   0  -1  -7  133.49    3.40
   0   1  -7  133.99    3.70
   0   1   7  134.59    4.00
   0   1   7  136.09    3.90
   0   1  -7  131.79    2.50
   0   1   7  131.89    2.50
   0   1  -7  122.89    3.70
   1  -1   7   95.89    2.80
  -1  -1  -7   89.09    3.00
   1  -1   7   92.89    3.10
  -1  -1  -7   97.59    2.70
  -1   1  -7   94.39    3.40
  -1   1  -7   93.29    2.40
   1   1   7   94.49    2.40
   1   1   7   97.99    3.40
   2  -1   7  109.69    3.10
  -2  -1  -7  105.49    3.40
  -2  -1  -7  110.39    3.10
   2  -1   7  106.39    3.50
   2   1   7  101.29    3.00
   2   1   7  116.09    4.10
  -2   1  -7  103.29    3.00
  -2   1  -7  107.49    3.90
  -3  -1  -7  707.63   14.20
  -3  -1  -7  711.13   13.60
   3  -1   7  693.03   14.00
   3  -1   7  723.93   13.70
  -3   1  -7  705.73   14.70
   3   1   7  697.13   13.80
   3   1   7  734.03   14.90
  -3   1  -7  713.53   13.90
   4  -1   7    0.30    1.10
  -4  -1  -7    0.20    1.20
   4  -1   7    1.40    1.20
  -4  -1  -7   -0.80    1.00
  -4   1  -7    1.30    1.20
   4   1   7    0.40    1.70
  -4   1  -7    0.60    1.50
   4   1   7   -0.30    1.20
   5  -1   7  130.79    5.00
  -5  -1  -7  140.79    5.10
  -5   1  -7  141.99    5.00
  -5   1  -7  130.99    5.20
   5   1   7  141.29    5.50
   5   1   7  137.49    5.00
  -6  -1  -7   33.60    3.10
   6  -1   7   35.20    3.30
   6   1   7   31.90    3.50
  -6   1  -7   44.10    3.90
   6   1   7   32.50    3.10
  -6   1  -7   47.60    3.80
  -7  -1  -7   25.10    3.20
   7  -1   7   30.00    3.60
   7   1   7   31.30    3.50
  -7   1  -7   29.50    3.40
   8  -1   7   37.00    4.10
  -8  -1  -7   33.30    4.00
  -8   1  -7   25.00    3.50
   8   1   7   30.00    4.00
  -9  -1  -7   24.10    3.90
   9  -1   7   27.70    4.10
   9   1   7   37.50    4.60
  -9   1  -7   26.70    3.80
   9  -2  -7   13.40    3.30
  -9  -2   7   12.10    3.20
  -9   2   7    9.90    3.50
   9   2  -7   12.80    3.70
   8  -2  -7   24.70    3.30
  -8  -2   7   29.00    3.60
   8   2  -7   20.90    3.70
  -8   2   7   24.20    3.90
   7  -2  -7   12.30    2.30
   7  -2  -7   18.60    2.70
  -7  -2   7   15.80    2.70
  -7  -2   7   18.10    2.80
  -7   2   7   17.40    3.10
   7   2  -7   13.50    3.10
  -6  -2   7   91.09    4.40
   6  -2  -7   86.99    4.10
  -6  -2   7   97.69    4.60
   6  -2  -7   88.69    4.50
  -6   2   7   86.49    5.10
   6   2  -7   93.19    5.10
   5  -2  -7   76.39    3.90
   5  -2  -7   75.19    3.40
  -5  -2   7   70.69    3.90
  -5  -2   7   75.69    3.50
  -5   2   7   76.89    4.20
   5   2  -7   76.19    4.30
   4  -2  -7   10.10    1.40
   4  -2  -7   12.10    2.00
  -4  -2   7   11.60    1.60
  -4  -2   7   12.10    2.00
   4   2  -7   12.20    2.20
   4   2  -7   13.20    1.20
  -4   2   7    9.80    1.10
  -4   2   7   15.50    2.40
  -3  -2   7   15.80    2.00
   3  -2  -7   12.10    1.80
  -3  -2   7   13.40    1.40
   3  -2  -7   14.90    1.40
  -3   2   7   13.80    1.30
   3   2  -7   14.90    1.30
  -3   2   7   10.10    1.90
   3   2  -7   11.30    1.90
   2  -2  -7  118.09    3.90
  -2  -2   7  109.89    3.80
  -2  -2   7  112.99    2.90
   2  -2  -7  113.49    2.80
  -2   2   7  107.49    4.10
   2   2  -7  108.29    4.10
  -2   2   7  113.39    3.50
   2   2  -7  115.99    3.30
   1  -2  -7  196.98    3.80
   1  -2  -7  198.38    5.10
  -1  -2   7  203.98    5.30
  -1  -2   7  207.48    3.90
   1   2  -7  200.58    5.60
  -1   2   7  202.58    5.30
  -1   2   7  204.38    5.60
   1   2  -7  210.38    5.10
   0  -2  -7  217.58    5.00
   0  -2   7  216.48    5.20
   0   2  -7  205.68    4.00
   0   2   7  207.98    4.10
   0   2   7  214.48    5.80
   0   2   7  220.18    5.80
   0   2  -7  222.58    5.80
   0   2  -7  205.68    5.50
  -1  -2  -7   18.90    1.40
   1  -2   7   20.10    1.60
   1  -2   7   18.80    2.00
  -1  -2  -7   19.40    2.00
  -1   2  -7   23.00    1.30
   1   2   7   18.40    1.40
  -1   2  -7   16.60    2.00
   1   2   7   17.00    2.10
  -2  -2  -7   55.89    2.70
  -2  -2  -7   54.79    2.00
   2  -2   7   56.69    2.00
   2  -2   7   49.20    2.90
  -2   2  -7   58.29    3.30
   2   2   7   54.09    3.50
   2   2   7   56.69    2.40
  -2   2  -7   58.19    2.30
   3  -2   7   47.90    3.00
  -3  -2  -7   52.39    2.00
   3  -2   7   47.20    2.00
  -3  -2  -7   48.30    2.80
   3   2   7   43.40    3.60
  -3   2  -7   46.00    2.50
   3   2   7   50.29    2.60
  -3   2  -7   47.00    3.50
  -4  -2  -7   95.19    4.00
   4  -2   7  102.89    4.20
  -4   2  -7  100.49    4.80
   4   2   7   96.89    4.00
  -4   2  -7  105.09    4.00
   4   2   7  104.19    5.10
  -5  -2  -7   43.30    3.50
   5  -2   7   48.80    3.20
   5   2   7   41.90    4.00
  -5   2  -7   43.30    3.90
  -5   2  -7   45.60    3.40
   5   2   7   46.80    3.30
  -6  -2  -7   11.70    2.50
   6  -2   7   11.30    2.30
   6   2   7   13.10    3.00
  -6   2  -7   14.50    2.50
  -6   2  -7   10.70    2.70
   6   2   7   12.20    2.60
   7  -2   7  208.38    7.40
  -7  -2  -7  204.98    7.40
   7   2   7  193.08    7.40
  -7   2  -7  195.88    7.90
  -7   2  -7  199.38    7.40
  -8  -2  -7   19.10    3.30
   8  -2   7   22.50    3.50
  -8   2  -7   23.00    3.50
   8   2   7   21.80    3.70
   9  -2   7   10.00    3.00
  -9  -2  -7    9.60    3.10
   9   2   7    8.50    3.10
  -9   2  -7    4.10    2.50
   9  -3  -7    3.60    2.40
  -9  -3   7    0.50    2.50
   9   3  -7   -1.40    3.10
  -9   3   7    4.30    3.40
   8  -3  -7   37.00    4.10
  -8  -3   7   41.10    4.00
   8  -3  -7   37.90    3.90
  -8   3   7   41.80    4.90
   8   3  -7   34.00    4.60
  -7  -3   7    2.40    2.40
  -7  -3   7    1.80    2.10
   7  -3  -7    4.60    2.20
   7  -3  -7    0.20    1.80
   7   3  -7    2.60    2.70
  -7   3   7    2.60    2.40
   6  -3  -7  124.19    4.90
  -6  -3   7  126.29    5.10
   6  -3  -7  133.49    5.70
  -6  -3   7  114.59    5.60
   6   3  -7  127.29    6.20
  -6   3   7  119.99    6.20
   5  -3  -7   53.69    3.80
   5  -3  -7   49.10    2.90
  -5  -3   7   53.79    4.00
  -5  -3   7   63.59    3.30
   5   3  -7   59.19    4.30
  -5   3   7   55.39    4.50
   4  -3  -7  198.38    5.20
   4  -3  -7  201.98    6.50
  -4  -3   7  188.28    6.50
  -4  -3   7  194.88    5.40
  -4   3   7  192.18    6.70
   4   3  -7  193.48    6.70
   3  -3  -7   22.80    2.30
  -3  -3   7   29.00    1.90
  -3  -3   7   33.60    3.00
   3  -3  -7   30.50    1.90
   3   3  -7   34.80    3.20
  -3   3   7   29.80    2.10
  -3   3   7   24.40    2.70
   3   3  -7   28.50    1.90
   2  -3  -7   60.09    2.10
  -2  -3   7   58.69    2.10
   2  -3  -7   59.89    3.20
  -2  -3   7   55.29    3.20
   2   3  -7   59.19    3.40
   2   3  -7   57.39    2.70
  -2   3   7   59.49    3.50
  -2   3   7   58.59    3.00
   1  -3  -7  256.47    6.40
  -1  -3   7  246.38    6.60
   1  -3  -7  254.17    5.20
  -1  -3   7  250.77    5.10
   1   3  -7  257.57    6.50
   1   3  -7  253.27    7.10
  -1   3   7  242.98    6.70
  -1   3   7  264.77    7.20
   0  -3  -7 1696.23   29.30
   0  -3   7 1672.73   29.50
   0   3  -7 1588.14   30.10
   0   3   7 1582.64   30.30
   0   3  -7 1561.14   28.30
   0   3  -7 1588.94   29.90
   0   3   7 1629.74   28.40
   0   3   7 1596.24   30.30
  -1  -3  -7  169.68    4.30
  -1  -3  -7  165.68    5.10
   1  -3   7  171.58    4.50
  -1   3  -7  174.68    5.70
  -1   3  -7  179.78    4.30
   1   3   7  171.98    4.40
   1   3   7  168.08    6.00
   2  -3   7    0.00    1.50
  -2  -3  -7    1.20    0.70
  -2  -3  -7    0.90    1.30
   2  -3   7    1.50    0.80
  -2   3  -7   -0.40    1.60
   2   3   7   -0.80    1.70
   2   3   7    2.20    1.10
  -2   3  -7   -0.30    1.00
   3  -3   7   24.40    2.60
  -3  -3  -7   20.70    1.40
  -3  -3  -7   25.80    2.70
   3  -3   7   22.60    1.40
   3   3   7   22.60    2.20
  -3   3  -7   23.90    3.10
   3   3   7   24.70    3.10
  -3   3  -7   22.10    2.10
   4  -3   7   88.29    4.30
  -4  -3  -7   96.59    4.40
   4   3   7   93.69    4.20
   4   3   7   85.09    5.20
  -4   3  -7   96.99    5.10
  -4   3  -7   92.09    4.10
  -5  -3  -7   69.49    4.10
   5  -3   7   59.49    4.00
   5   3   7   77.09    4.20
  -5   3  -7   68.29    4.10
  -5   3  -7   67.19    4.90
   5   3   7   62.59    5.00
   6  -3   7  104.09    5.20
  -6  -3  -7  118.79    5.50
   6   3   7  108.29    5.30
  -6   3  -7   95.59    5.90
  -6   3  -7  106.59    5.30
   6   3   7  107.59    6.30
   7  -3   7   12.90    2.80
  -7  -3  -7   21.40    3.30
   7   3   7   11.50    3.40
  -7   3  -7   18.80    3.00
  -7   3  -7   12.80    3.20
   7   3   7   17.10    3.30
  -8  -3  -7   49.99    5.00
   8  -3   7   45.50    4.60
  -8   3  -7   41.60    4.70
  -8   3  -7   39.50    4.40
   8   3   7   48.00    4.90
  -9  -4   7   13.90    3.40
   9  -4  -7   13.80    3.40
   9  -4  -7   12.90    3.10
   9   4  -7    8.80    4.30
  -9   4   7   15.80    4.40
  -8  -4   7   29.10    4.10
   8  -4  -7   37.00    4.30
  -8  -4   7   32.40    3.80
   8  -4  -7   26.30    3.50
   8   4  -7   40.10    5.10
  -8   4   7   31.50    4.80
   7  -4  -7   19.70    3.30
   7  -4  -7   20.30    2.80
  -7  -4   7   22.50    3.60
  -7  -4   7   20.40    3.00
  -7   4   7   17.30    3.80
   7   4  -7   18.10    3.70
   6  -4  -7    0.40    2.00
  -6  -4   7    2.10    2.50
  -6  -4   7    5.40    1.90
   6  -4  -7    6.80    1.90
   6   4  -7    9.00    2.90
  -6   4   7    6.30    2.80
  -5  -4   7   31.60    2.80
   5  -4  -7   25.40    3.20
   5  -4  -7   26.30    2.40
  -5  -4   7   24.60    3.40
  -5   4   7   27.20    3.50
   5   4  -7   25.50    3.30
   4  -4  -7  232.48    6.10
  -4  -4   7  238.28    7.70
  -4  -4   7  234.68    6.20
   4  -4  -7  244.08    7.70
  -4   4   7  237.68    8.00
   4   4  -7  234.88    8.00
  -3  -4   7    3.90    1.20
   3  -4  -7    6.80    1.20
   3  -4  -7    5.90    2.00
  -3  -4   7    4.50    2.10
  -3   4   7    5.00    2.30
   3   4  -7    4.90    2.20
  -3   4   7    6.80    1.50
  -2  -4   7   84.39    2.90
   2  -4  -7   81.19    4.00
  -2  -4   7   83.79    4.40
   2  -4  -7   83.19    2.80
   2   4  -7   81.19    4.50
  -2   4   7   87.19    3.90
  -2   4   7   77.49    4.60
   2   4  -7   79.69    3.50
  -1  -4   7    7.00    1.10
   1  -4  -7   11.20    1.90
   1  -4  -7    6.50    1.10
  -1  -4   7    7.00    1.80
   1   4  -7   11.30    2.10
  -1   4   7    6.40    1.80
  -1   4   7   10.80    2.30
   1   4  -7   12.60    1.90
   0  -4  -7   67.49    3.10
   0  -4   7   68.99    3.40
   0   4  -7   70.49    2.60
   0   4  -7   66.89    3.80
   0   4   7   69.69    3.90
   0   4  -7   74.39    3.90
   0   4   7   71.29    2.80
   0   4   7   74.29    4.20
  -1  -4  -7    0.10    1.60
   1  -4   7    0.20    1.10
  -1  -4  -7    0.50    0.90
   1   4   7    2.10    1.10
   1   4   7    0.10    1.70
  -1   4  -7    0.70    1.80
  -1   4  -7    2.80    1.10
  -2  -4  -7   39.90    3.00
   2  -4   7   40.80    3.10
   2  -4   7   42.30    2.20
  -2  -4  -7   39.00    2.00
  -2   4  -7   31.90    3.30
   2   4   7   42.60    4.10
  -2   4  -7   39.40    2.60
   2   4   7   36.60    2.70
  -3  -4  -7   -0.10    1.70
   3  -4   7    3.30    1.60
   3   4   7    0.90    2.10
  -3   4  -7    1.10    1.40
  -3   4  -7   -0.30    2.10
   3   4   7    0.70    1.40
  -4  -4  -7  365.96    9.70
   4  -4   7  360.66    9.70
  -4   4  -7  371.06    9.40
   4   4   7  363.66   11.30
   4   4   7  368.36    9.60
  -4   4  -7  352.76   10.80
  -5  -4  -7    9.20    2.40
   5  -4   7   11.20    2.40
  -5   4  -7   12.20    2.40
   5   4   7    4.90    2.90
  -5   4  -7    7.10    2.90
   5   4   7    9.80    2.30
   6  -4   7   59.69    4.60
  -6  -4  -7   44.80    4.10
   6   4   7   53.99    4.40
  -6   4  -7   57.29    5.40
  -6   4  -7   47.40    4.20
   6   4   7   49.90    5.30
  -7  -4  -7   21.80    3.60
   7  -4   7   19.80    3.30
  -7   4  -7   27.40    4.30
  -7   4  -7   22.10    3.50
   7   4   7   23.00    4.30
   7   4   7   20.50    3.50
   8  -4   7    1.70    2.60
  -8  -4  -7    5.50    2.80
  -8   4  -7    4.80    3.30
   8   4   7    5.00    2.80
  -8   4  -7    6.80    2.60
  -8  -5   7   90.89    6.40
   8  -5  -7   94.19    6.30
   8   5  -7   99.79    7.80
  -8   5   7   93.39    7.00
  -7  -5   7    9.50    3.30
   7  -5  -7    6.00    2.80
  -7   5   7    7.80    3.20
   7   5  -7    8.40    3.50
  -6  -5   7   42.90    4.50
  -6  -5   7   40.30    3.70
   6  -5  -7   47.30    4.70
  -6   5   7   43.60    4.90
   6   5  -7   42.30    4.90
  -5  -5   7   10.20    3.00
  -5  -5   7   13.20    2.20
   5  -5  -7   13.50    3.00
   5   5  -7    5.10    2.70
  -5   5   7   14.20    3.40
  -4  -5   7  219.68    6.20
   4  -5  -7  224.78    7.80
   4   5  -7  214.58    8.20
  -4   5   7  208.88    8.20
  -3  -5   7    5.20    2.20
   3  -5  -7    6.40    2.30
   3  -5  -7    3.70    2.00
  -3  -5   7    6.00    1.50
   3   5  -7    3.70    2.30
  -3   5   7    4.10    2.30
   2  -5  -7  669.73   13.80
  -2  -5   7  654.53   13.60
  -2  -5   7  662.73   15.30
   2  -5  -7  675.33   15.00
   2   5  -7  674.03   14.30
  -2   5   7  657.83   14.80
   2   5  -7  653.63   15.60
  -2   5   7  660.03   15.60
   1  -5  -7    9.30    1.90
  -1  -5   7    5.60    1.80
   1  -5  -7    6.00    1.30
  -1  -5   7    6.00    2.00
  -1   5   7    9.50    2.30
  -1   5   7    8.90    2.60
   1   5  -7    5.70    2.00
   1   5  -7    9.00    2.40
   0  -5  -7   94.29    3.90
   0  -5   7   94.59    4.20
   0   5   7   85.19    4.90
   0   5   7   99.49    4.90
   0   5  -7   86.59    4.90
   0   5  -7   96.19    4.90
  -1  -5  -7   25.40    2.10
  -1  -5  -7   23.90    2.70
   1  -5   7   21.50    2.30
   1   5   7   23.10    2.30
   1   5   7   24.60    3.30
  -1   5  -7   28.40    3.30
  -2  -5  -7  142.69    5.70
   2  -5   7  147.89    5.80
  -2   5  -7  147.09    6.50
   2   5   7  140.49    6.90
   2   5   7  145.49    5.10
  -3  -5  -7    3.00    1.80
   3  -5   7    4.30    2.00
   3   5   7    4.70    1.80
  -3   5  -7    8.70    2.70
   3   5   7    5.30    2.80
  -4  -5  -7  252.87    7.90
   4  -5   7  237.88    7.80
  -4   5  -7  238.88    9.20
   4   5   7  231.58    7.50
   4   5   7  227.78    9.30
   5  -5   7    7.80    2.50
  -5  -5  -7   15.10    2.90
   5   5   7    8.70    3.50
  -5   5  -7   16.50    3.70
   5   5   7   14.20    2.70
   6  -5   7   16.60    3.20
  -6  -5  -7   14.40    3.20
   6   5   7   12.90    4.10
  -6   5  -7   10.40    3.70
   6   5   7   15.70    3.10
   7  -5   7    7.20    2.80
  -7  -5  -7    5.40    2.90
   7   5   7    5.80    2.90
  -7   5  -7    2.60    3.40
   7   5   7    8.30    3.90
  -7  -6   7    6.10    3.30
   7  -6  -7    9.60    3.30
   7   6  -7   10.50    3.80
  -7   6   7   10.60    3.70
   6  -6  -7   42.80    4.70
  -6  -6   7   31.20    4.50
   6   6  -7   33.60    4.80
  -6   6   7   38.50    5.20
   5  -6  -7   11.30    3.00
  -5  -6   7    6.20    3.00
  -5   6   7    9.60    3.30
   5   6  -7   14.40    3.50
  -4  -6   7   76.59    5.70
   4  -6  -7   86.99    5.60
  -4   6   7   77.09    5.90
   4   6  -7   85.19    6.10
  -3  -6   7   24.60    3.40
   3  -6  -7   28.10    3.40
   3   6  -7   23.80    3.70
  -3   6   7   40.90    4.60
   2  -6  -7  105.79    5.20
  -2  -6   7  106.29    5.60
   2   6  -7  105.79    5.90
  -2   6   7  102.89    5.90
   1  -6  -7   46.70    3.50
  -1  -6   7   43.50    3.80
  -1   6   7   52.99    4.60
   1   6  -7   39.60    4.20
   1   6  -7   46.10    3.90
  -1   6   7   39.40    4.00
   0  -6  -7   86.19    4.10
   0  -6   7   79.69    4.40
   0   6   7   67.49    4.90
   0   6  -7   80.89    5.10
   0   6   7   76.29    5.30
   0   6  -7   86.19    5.00
   1  -6   7   17.90    2.90
   1  -6   7   19.90    2.40
  -1  -6  -7   18.90    2.70
  -1   6  -7   21.80    3.50
   1   6   7   13.10    3.10
   2  -6   7    8.80    2.40
  -2  -6  -7    9.40    2.40
   2   6   7   11.60    3.30
  -2   6  -7   13.50    3.30
   3  -6   7   74.89    4.80
  -3  -6  -7   81.19    4.80
  -3   6  -7   81.19    5.90
   3   6   7   64.89    6.00
   4  -6   7   31.90    3.70
  -4  -6  -7   31.30    3.60
  -4   6  -7   32.40    4.50
   4   6   7   29.50    4.60
  -5  -6  -7   33.80    4.00
   5  -6   7   36.70    4.00
  -5   6  -7   25.40    4.80
   5   6   7   35.00    5.40
   6  -6   7   18.80    3.30
  -6  -6  -7   18.60    3.20
   6   6   7   19.70    4.60
  -6   6  -7   26.40    4.70
  -7  -6  -7    8.60    3.20
   7  -6   7   12.00    3.30
  -7   6  -7   18.00    4.40
   7   6   7   10.70    4.40
  -6  -7   7   51.29    5.40
   6  -7  -7   66.59    6.10
   6   7  -7   53.09    5.90
  -6   7   7   59.59    6.40
  -5  -7   7   36.30    4.70
   5  -7  -7   39.70    4.60
   5   7  -7   49.80    5.50
  -5   7   7   44.30    5.50
   4  -7  -7   36.70    4.40
  -4  -7   7   36.50    4.50
   4   7  -7   32.20    4.70
  -4   7   7   35.40    4.80
   3  -7  -7   19.90    3.40
  -3  -7   7   11.50    3.40
  -3   7   7   14.40    3.60
   3   7  -7   11.00    3.50
   2  -7  -7   -0.30    1.90
  -2  -7   7    0.80    2.40
  -2   7   7    2.90    2.70
   2   7  -7   -1.40    2.50
  -1  -7   7   48.80    4.30
   1  -7  -7   49.70    4.10
  -1   7   7   48.30    4.90
  -1   7   7   49.20    4.60
   1   7  -7   59.79    5.20
   0  -7   7    4.50    2.10
   0   7  -7    5.70    2.80
   0   7   7    2.80    2.60
   0   7  -7    6.30    2.50
   1  -7   7   46.90    4.30
  -1  -7  -7   57.99    4.70
   1   7   7   51.49    5.20
  -1   7  -7   51.79    4.90
   2  -7   7   -0.30    2.00
  -2  -7  -7    3.00    2.20
   2   7   7    1.50    2.80
  -2   7  -7    2.40    2.70
   3  -7   7    4.40    2.50
  -3  -7  -7    3.90    2.50
   3   7   7    8.30    3.60
  -3   7  -7   12.00    3.70
  -4  -7  -7   30.30    4.00
   4  -7   7   28.50    3.80
   4   7   7   34.60    5.10
  -4   7  -7   29.60    4.80
   5  -7   7   31.40    4.00
  -5  -7  -7   37.60    4.30
  -5   7  -7   25.20    4.90
   5   7   7   27.00    5.20
  -4  -8   7    3.50    3.30
   4  -8  -7    2.20    2.70
  -4   8   7   -0.40    3.00
   4   8  -7   -2.10    3.00
  -3  -8   7   37.70    4.80
   3  -8  -7   49.10    4.90
  -3   8   7   35.40    4.90
   3   8  -7   51.79    5.50
   2  -8  -7    5.30    2.40
  -2  -8   7    9.50    3.30
   2   8  -7    8.70    3.60
  -2   8   7    4.40    3.10
  -1  -8   7   39.60    4.40
   1  -8  -7   28.70    4.80
  -1   8   7   36.20    4.70
   1   8  -7   41.90    5.00
   0  -8  -7   19.30    3.20
   0   8   7   24.20    4.00
   0   8  -7   16.60    3.50
  -1  -8  -7   33.60    4.20
   1  -8   7   30.50    4.00
  -1   8  -7   32.40    4.40
   1   8   7   26.10    4.50
   2  -8   7    4.40    2.70
  -2  -8  -7    0.70    2.40
  -2   8  -7    5.90    3.40
   2   8   7    1.70    3.00
  -3  -8  -7   50.39    4.70
   3  -8   7   53.29    5.00
  -3   8  -7   40.70    5.30
   3   8   7   44.40    5.90
   4  -8   7   11.20    3.20
  -4   8  -7   14.20    4.00
   4   8   7    7.40    3.90
   1   9  -7   35.60    4.90
   0  -9  -7    0.30    2.60
   0  -9   7    4.80    3.00
 -10   0   8    1.30    3.00
  10   0  -8    0.40    2.90
  -9   0   8    1.10    2.70
   9   0  -8    0.90    2.50
   8   0  -8   43.30    4.50
  -8   0   8   48.30    4.60
  -7   0   8    7.90    2.40
   7   0  -8   12.50    2.70
  -6   0   8   41.60    3.50
   6   0  -8   38.90    2.60
  -6   0   8   42.40    3.00
   6   0  -8   48.60    3.80
  -5   0   8    2.40    1.20
  -5   0   8    2.50    1.70
   5   0  -8    2.30    1.20
   5   0  -8    3.30    1.60
  -4   0   8  433.16    9.20
  -4   0   8  438.06    9.80
   4   0  -8  407.06    9.10
   4   0  -8  444.06    9.70
   3   0  -8   25.90    1.80
  -3   0   8   25.70    2.10
   3   0  -8   26.30    2.10
  -3   0   8   23.80    1.80
  -2   0   8 1288.57   23.40
   2   0  -8 1289.77   23.30
  -2   0   8 1308.17   23.50
   2   0  -8 1298.17   23.40
  -1   0   8    2.50    1.00
  -1   0   8    2.40    1.10
   1   0  -8    2.10    1.00
   1   0  -8    0.70    1.00
   0   0   8   35.20    2.10
   0   0  -8   36.90    1.90
   1   0   8    4.80    1.20
  -1   0  -8    4.80    1.00
  -1   0  -8    4.40    1.10
   1   0   8    4.00    1.00
  -2   0  -8   49.60    2.50
  -2   0  -8   50.69    2.20
   2   0   8   51.59    2.30
   2   0   8   51.69    2.70
   3   0   8    4.10    1.50
   3   0   8    3.20    1.20
  -3   0  -8    3.70    1.20
  -3   0  -8    4.70    1.40
  -4   0  -8   19.00    2.20
  -4   0  -8   21.30    2.20
   4   0   8   19.70    2.30
   4   0   8   18.70    2.00
  -5   0  -8   19.70    2.40
  -5   0  -8   20.90    2.40
   5   0   8   17.80    2.40
   5   0   8   19.20    2.30
   6   0   8   56.39    3.80
  -6   0  -8   47.80    3.70
   7   0   8   30.30    3.60
  -7   0  -8   25.40    3.10
  -8   0  -8   22.30    3.50
   8   0   8   18.30    3.30
   9   0   8    0.70    2.60
  -9   0  -8    3.80    2.50
  -9  -1   8    1.00    2.70
   9  -1  -8    3.10    2.70
   9   1  -8   -2.10    2.70
  -9   1   8   -0.30    2.50
  -8  -1   8   72.79    5.10
   8  -1  -8   72.49    5.00
   8   1  -8   72.79    5.40
  -8   1   8   63.29    5.30
   7  -1  -8   60.19    3.70
   7  -1  -8   51.29    4.10
  -7  -1   8   52.09    3.90
  -7   1   8   56.49    4.80
   7   1  -8   57.99    4.30
  -6  -1   8   51.99    3.60
   6  -1  -8   53.99    3.30
  -6  -1   8   51.69    3.30
   6  -1  -8   47.10    3.60
   6   1  -8   55.59    3.80
  -6   1   8   53.19    4.20
   5  -1  -8   30.50    2.60
  -5  -1   8   31.00    2.70
  -5  -1   8   28.80    2.50
   5  -1  -8   32.00    2.80
  -5   1   8   29.20    1.80
  -5   1   8   29.10    3.10
   5   1  -8   28.30    2.90
   5   1  -8   28.40    1.90
   4  -1  -8  639.14   12.80
  -4  -1   8  622.74   13.00
   4  -1  -8  618.24   13.00
  -4  -1   8  636.14   12.90
  -4   1   8  620.04   12.10
  -4   1   8  637.44   13.60
   4   1  -8  649.64   13.50
   4   1  -8  622.64   12.10
  -3  -1   8   46.10    2.20
   3  -1  -8   42.50    2.10
   3  -1  -8   49.20    2.60
  -3  -1   8   45.60    2.60
   3   1  -8   46.10    2.90
  -3   1   8   50.99    2.80
   3   1  -8   46.50    2.00
  -3   1   8   42.80    2.00
  -2  -1   8  255.47    5.30
   2  -1  -8  241.28    5.90
  -2  -1   8  248.78    6.00
   2  -1  -8  246.48    5.20
   2   1  -8  251.77    5.50
  -2   1   8  248.78    6.30
  -2   1   8  251.47    5.70
   2   1  -8  251.07    6.20
  -1  -1   8   45.50    1.50
   1  -1  -8   41.60    1.40
   1  -1  -8   44.60    2.20
  -1  -1   8   46.30    2.30
  -1   1   8   44.60    2.60
  -1   1   8   45.20    2.20
   1   1  -8   43.10    2.10
   1   1  -8   45.10    2.50
   0  -1  -8 3492.15   60.79
   0  -1   8 3556.64   60.89
   0   1  -8 3477.35   61.09
   0   1  -8 3479.65   59.99
   0   1   8 3545.15   61.29
   0   1   8 3512.35   61.29
   0   1   8 3534.65   59.79
   0   1  -8 3570.94   61.19
   1  -1   8  139.69    4.00
  -1  -1  -8  147.39    3.70
   1  -1   8  146.69    3.80
  -1  -1  -8  143.49    4.10
   1   1   8  141.69    4.40
  -1   1  -8  142.19    3.20
   1   1   8  143.09    3.30
  -2  -1  -8  643.74   12.20
   2  -1   8  630.74   12.50
   2  -1   8  632.74   12.20
  -2  -1  -8  599.44   12.50
   2   1   8  658.43   13.30
  -2   1  -8  637.34   13.10
   2   1   8  623.24   12.00
  -2   1  -8  633.34   12.00
  -3  -1  -8    4.80    1.50
   3  -1   8    4.80    1.40
  -3  -1  -8    3.70    1.10
   3  -1   8    5.00    1.20
  -3   1  -8    3.60    1.20
  -3   1  -8    5.50    1.70
   3   1   8    4.60    1.80
   3   1   8    6.00    1.30
   4  -1   8   54.09    2.80
  -4  -1  -8   48.70    2.60
   4  -1   8   46.90    3.00
  -4  -1  -8   52.09    2.90
   4   1   8   55.39    2.90
  -4   1  -8   50.59    2.90
  -4   1  -8   58.09    3.50
   4   1   8   50.59    3.50
   5  -1   8   20.60    2.40
  -5  -1  -8   18.20    2.30
  -5   1  -8   20.30    2.70
   5   1   8   23.30    2.60
   5   1   8   19.10    2.80
  -5   1  -8   21.20    2.50
  -6  -1  -8  304.37    8.60
   6  -1   8  302.17    8.50
   6   1   8  305.07    8.60
   6   1   8  306.07    9.10
  -6   1  -8  279.07    8.70
  -6   1  -8  294.87    8.50
  -7  -1  -8    7.20    2.60
   7  -1   8    9.10    2.50
   7   1   8    8.20    2.50
  -7   1  -8    9.60    2.50
   8  -1   8   45.80    4.50
  -8  -1  -8   36.00    3.80
  -8   1  -8   35.80    3.90
   8   1   8   46.20    4.80
  -9  -1  -8    9.20    3.10
  -9   1  -8   11.70    3.00
   9   1   8    7.10    3.00
   9  -2  -8   20.50    3.60
  -9  -2   8   11.60    3.20
  -9   2   8   17.70    4.00
   9   2  -8   10.60    3.50
   8  -2  -8   32.10    3.70
   8  -2  -8   33.70    4.30
  -8  -2   8   39.20    4.20
  -8   2   8   42.70    4.90
   8   2  -8   41.40    4.40
   7  -2  -8   59.19    4.10
   7  -2  -8   62.59    4.00
  -7  -2   8   51.19    4.00
  -7  -2   8   62.89    4.10
  -7   2   8   52.19    4.70
   7   2  -8   58.89    5.00
   6  -2  -8  268.37    7.40
   6  -2  -8  231.58    7.40
  -6  -2   8  256.57    7.60
  -6  -2   8  250.97    7.30
  -6   2   8  247.88    8.40
   6   2  -8  244.78    8.20
   5  -2  -8   18.20    2.40
  -5  -2   8   22.10    2.60
  -5  -2   8   19.20    2.20
   5  -2  -8   17.80    2.00
  -5   2   8   21.30    3.00
   5   2  -8   22.10    2.90
   4  -2  -8   37.90    2.90
  -4  -2   8   33.60    2.30
   4  -2  -8   28.40    2.20
  -4  -2   8   30.50    2.60
  -4   2   8   32.90    1.80
  -4   2   8   32.60    3.20
   4   2  -8   31.00    1.70
   4   2  -8   38.50    3.30
   3  -2  -8   25.40    1.60
  -3  -2   8   25.80    2.40
   3  -2  -8   20.90    2.10
  -3  -2   8   27.30    1.70
   3   2  -8   21.10    2.30
  -3   2   8   23.70    1.70
   3   2  -8   20.50    1.60
  -3   2   8   20.70    2.40
  -2  -2   8   35.90    2.60
   2  -2  -8   45.90    1.60
   2  -2  -8   44.30    2.70
  -2  -2   8   45.10    1.70
  -2   2   8   43.20    2.80
   2   2  -8   50.59    3.10
  -2   2   8   39.60    2.30
   2   2  -8   42.70    2.20
   1  -2  -8  541.35   11.10
  -1  -2   8  555.14   11.30
  -1  -2   8  540.85    9.60
   1   2  -8  550.44   11.70
  -1   2   8  555.04   11.40
  -1   2   8  544.95   11.70
   1   2  -8  562.04   11.10
   0  -2  -8  296.57    6.40
   0  -2   8  280.37    6.50
   0   2   8  285.87    5.30
   0   2   8  295.27    7.30
   0   2  -8  297.17    7.10
   0   2  -8  291.47    7.00
   0   2   8  278.37    7.10
   1  -2   8  448.56    9.00
  -1  -2  -8  439.86    9.70
  -1  -2  -8  456.85    8.90
   1  -2   8  451.05    9.70
   1   2   8  450.85    8.60
   1   2   8  440.16   10.20
  -1   2  -8  457.45    8.50
  -1   2  -8  443.66   10.00
   2  -2   8   83.29    2.70
   2  -2   8   86.79    3.50
  -2  -2  -8   83.29    3.30
  -2  -2  -8   85.39    2.60
   2   2   8   90.09    2.90
  -2   2  -8   87.29    4.00
   2   2   8   90.59    4.30
  -2   2  -8   88.39    2.80
  -3  -2  -8   37.20    2.70
  -3  -2  -8   36.60    1.90
   3  -2   8   38.00    2.80
   3  -2   8   40.30    2.00
  -3   2  -8   36.80    2.20
  -3   2  -8   36.90    3.20
   3   2   8   40.90    2.50
   3   2   8   35.30    3.40
  -4  -2  -8  224.68    6.50
   4  -2   8  217.08    6.40
  -4   2  -8  225.98    6.20
   4   2   8  220.08    7.40
   4   2   8  220.48    6.30
  -4   2  -8  212.38    7.10
   5  -2   8   26.00    2.90
  -5  -2  -8   28.90    2.70
   5   2   8   25.20    2.70
   5   2   8   23.30    3.30
  -5   2  -8   24.10    3.20
  -5   2  -8   24.20    2.70
  -6  -2  -8    4.40    1.90
   6  -2   8    4.50    2.10
  -6   2  -8    5.30    2.30
   6   2   8   -0.60    1.70
   6   2   8    6.90    2.50
  -6   2  -8    4.70    2.00
  -7  -2  -8  110.09    5.70
   7  -2   8  112.49    5.40
  -7   2  -8  116.59    6.20
   7   2   8  116.69    5.90
  -7   2  -8  115.39    5.70
  -8  -2  -8   53.79    4.80
   8  -2   8   75.99    5.20
   8   2   8   81.29    5.50
  -8   2  -8   67.19    5.10
  -9  -2  -8    2.90    2.70
   9  -2   8    5.20    2.80
   9   2   8    4.80    2.90
  -9   2  -8    2.20    2.30
  -9  -3   8   71.29    5.40
   9  -3  -8   58.29    5.00
  -9   3   8   58.79    6.10
   9   3  -8   67.09    6.30
   8  -3  -8   11.50    2.70
  -8  -3   8   18.60    4.60
   8  -3  -8    9.80    2.70
  -8  -3   8   20.40    3.30
   8   3  -8   22.10    4.20
  -8   3   8   11.40    3.20
   7  -3  -8   16.80    2.70
   7  -3  -8   19.90    3.10
  -7  -3   8   20.80    3.30
  -7  -3   8   25.20    3.20
   7   3  -8   19.40    3.50
  -7   3   8   17.00    3.50
   6  -3  -8   97.09    5.10
   6  -3  -8  106.89    4.40
  -6  -3   8   98.89    4.50
  -6  -3   8  101.29    5.30
  -6   3   8  106.89    5.90
   6   3  -8  100.89    5.50
  -5  -3   8  158.48    6.10
   5  -3  -8  161.18    6.10
  -5  -3   8  148.19    5.00
   5  -3  -8  142.19    4.80
  -5   3   8  136.39    6.10
   5   3  -8  163.08    6.50
   4  -3  -8   80.79    3.10
  -4  -3   8   86.69    4.50
   4  -3  -8   77.99    4.10
  -4  -3   8   88.99    3.40
   4   3  -8   78.39    4.30
  -4   3   8   82.79    4.70
  -3  -3   8   13.90    2.30
   3  -3  -8   15.10    1.40
  -3  -3   8   17.90    1.50
   3  -3  -8   12.50    2.00
  -3   3   8   15.80    2.40
   3   3  -8   17.90    2.60
  -3   3   8   16.50    1.70
   3   3  -8   14.60    1.50
  -2  -3   8   86.69    3.90
   2  -3  -8   88.09    3.80
  -2  -3   8   82.29    2.50
   2  -3  -8   81.99    2.40
   2   3  -8   82.79    3.30
   2   3  -8   86.89    4.10
  -2   3   8   83.39    4.30
  -2   3   8   88.29    3.60
  -1  -3   8  422.56    7.80
  -1  -3   8  424.16    9.50
   1  -3  -8  417.06    7.80
   1  -3  -8  414.36    9.30
   1   3  -8  415.16    9.40
   1   3  -8  416.36   10.00
  -1   3   8  427.96   10.20
  -1   3   8  402.76    9.60
   0  -3   8  271.97    6.60
   0  -3  -8  280.17    6.40
   0   3  -8  254.67    7.10
   0   3   8  263.17    7.40
   0   3   8  259.27    7.30
   0   3  -8  258.77    5.30
   0   3  -8  257.67    7.00
   0   3   8  254.67    5.40
   1  -3   8  572.04   11.30
  -1  -3  -8  569.94   11.10
  -1  -3  -8  561.44   12.20
  -1   3  -8  559.84   12.60
  -1   3  -8  568.84   10.80
   1   3   8  560.94   10.90
   1   3   8  550.34   12.80
   2  -3   8  120.29    4.50
  -2  -3  -8  117.59    3.20
  -2  -3  -8  117.39    4.50
   2  -3   8  116.89    3.40
   2   3   8  114.59    3.70
   2   3   8  108.49    5.00
  -2   3  -8  112.39    3.60
  -2   3  -8  115.39    5.00
   3  -3   8  495.65   11.40
  -3  -3  -8  498.55    9.90
  -3  -3  -8  518.25   11.60
   3  -3   8  498.95    9.80
   3   3   8  502.85   12.80
  -3   3  -8  489.75   12.40
   3   3   8  515.55   11.00
  -3   3  -8  504.85   10.80
  -4  -3  -8   81.09    4.20
   4  -3   8   69.49    4.00
   4   3   8   82.69    5.20
  -4   3  -8   73.59    4.80
   4   3   8   76.89    3.80
  -4   3  -8   77.29    3.70
  -5  -3  -8   18.70    2.60
   5  -3   8   14.50    2.50
  -5   3  -8   15.70    2.40
  -5   3  -8   14.70    3.10
   5   3   8   17.30    2.60
   5   3   8    4.30    2.70
   6  -3   8   15.50    2.60
  -6  -3  -8   10.80    2.50
  -6   3  -8   17.60    3.50
   6   3   8    6.90    3.00
   6   3   8   12.00    2.50
  -6   3  -8   17.00    2.70
   7  -3   8   53.19    4.70
  -7  -3  -8   51.39    4.60
   7   3   8   46.60    5.00
   7   3   8   56.59    4.80
  -7   3  -8   50.99    4.50
  -7   3  -8   44.80    4.80
   8  -3   8    4.00    2.60
  -8  -3  -8    5.60    2.80
  -8   3  -8    8.80    5.00
  -8   3  -8   -1.70    2.00
   8   3   8    2.20    2.50
   9  -4  -8   41.60    4.60
  -8  -4   8   15.30    3.30
   8  -4  -8   16.80    3.30
  -8  -4   8   11.40    2.90
  -8   4   8   13.30    3.90
   8   4  -8   15.00    4.00
  -7  -4   8    0.70    2.00
  -7  -4   8    5.10    2.70
   7  -4  -8    3.10    2.00
   7  -4  -8    2.80    2.40
   7   4  -8    3.10    3.00
  -7   4   8    1.10    2.60
  -6  -4   8   13.40    3.00
  -6  -4   8    9.00    2.20
   6  -4  -8    9.90    2.00
   6  -4  -8   16.90    3.00
  -6   4   8   13.20    3.30
   6   4  -8   13.00    3.10
  -5  -4   8   26.70    3.40
  -5  -4   8   22.10    2.40
   5  -4  -8   19.50    2.10
   5  -4  -8   20.80    3.10
   5   4  -8   18.90    3.20
  -5   4   8   21.10    3.50
   4  -4  -8   33.30    2.30
   4  -4  -8   27.90    3.10
  -4  -4   8   35.80    3.70
  -4  -4   8   33.60    2.50
   4   4  -8   28.90    3.50
  -4   4   8   29.80    3.70
   3  -4  -8  249.97    7.60
   3  -4  -8  253.97    5.90
  -3  -4   8  239.28    6.00
  -3  -4   8  264.57    7.90
  -3   4   8  254.07    6.80
   3   4  -8  257.27    8.20
   3   4  -8  252.37    6.90
  -3   4   8  257.97    8.30
  -2  -4   8    1.60    1.80
   2  -4  -8    0.70    0.80
  -2  -4   8    0.80    0.90
   2  -4  -8   -1.90    1.40
   2   4  -8   -0.30    1.30
  -2   4   8    2.40    1.90
  -2   4   8    1.30    1.40
   2   4  -8    1.10    1.90
   1  -4  -8   12.50    1.20
   1  -4  -8   14.80    2.00
  -1  -4   8   11.40    2.00
  -1  -4   8   11.40    1.10
   1   4  -8   10.30    2.00
  -1   4   8    9.40    2.20
  -1   4   8   15.80    2.40
   1   4  -8   12.60    2.40
   0  -4   8    2.70    1.40
   0  -4  -8    1.00    1.10
   0   4   8    0.70    1.70
   0   4  -8    4.20    1.80
   0   4  -8    3.90    1.00
   0   4  -8    1.40    2.00
   0   4   8    2.80    1.00
   0   4   8    3.70    1.80
   1  -4   8   27.10    2.10
  -1  -4  -8   24.20    2.50
  -1  -4  -8   27.60    2.10
  -1   4  -8   27.30    2.00
   1   4   8   25.00    2.00
   1   4   8   26.60    3.20
  -1   4  -8   28.00    3.20
  -2  -4  -8    3.40    1.00
  -2  -4  -8    2.50    1.80
   2  -4   8    6.50    1.90
   2  -4   8    1.20    1.00
  -2   4  -8    4.30    2.20
   2   4   8    2.10    2.10
   2   4   8    1.20    1.20
  -2   4  -8    2.00    1.30
  -3  -4  -8  768.52   16.50
   3  -4   8  758.02   16.50
  -3   4  -8  788.42   15.80
   3   4   8  751.32   15.80
   3   4   8  764.52   18.10
  -3   4  -8  764.42   17.70
  -4  -4  -8   12.30    2.30
   4  -4   8   14.90    2.70
  -4   4  -8   11.90    3.00
  -4   4  -8   11.30    2.10
   4   4   8   14.70    2.30
   4   4   8   10.70    3.20
   5  -4   8   40.80    3.70
  -5  -4  -8   36.10    3.60
   5   4   8   41.40    3.60
   5   4   8   34.70    4.60
  -5   4  -8   38.70    3.40
  -5   4  -8   41.20    4.70
   6  -4   8    2.30    2.40
  -6  -4  -8    1.60    2.30
   6   4   8    4.40    3.30
  -6   4  -8    9.00    2.50
   6   4   8    3.70    2.30
  -6   4  -8    7.10    3.20
  -7  -4  -8   14.40    3.30
   7  -4   8   13.40    3.00
   7   4   8    9.00    3.00
  -7   4  -8   16.90    3.80
  -7   4  -8   11.60    2.80
   7   4   8   21.40    4.30
  -8  -4  -8    7.80    3.10
   8  -4   8   17.00    3.50
   8   4   8    9.90    3.20
  -8   4  -8    8.90    3.60
  -8   4  -8   11.80    3.10
  -8  -5   8    8.70    3.30
   8  -5  -8    7.10    2.90
  -8   5   8    6.70    3.10
   8   5  -8    7.30    3.60
  -7  -5   8   76.69    5.90
   7  -5  -8   89.49    6.00
  -7   5   8   85.19    6.50
   7   5  -8   80.49    6.60
   6  -5  -8    3.30    2.50
  -6  -5   8    6.00    3.00
  -6   5   8    2.40    3.10
   6   5  -8    9.60    3.40
   5  -5  -8   93.39    5.40
  -5  -5   8   89.09    5.50
   5   5  -8   96.59    6.10
  -5   5   8   92.49    6.00
   4  -5  -8    2.20    2.00
  -4  -5   8   -0.10    2.10
  -4   5   8    0.80    2.60
   4   5  -8   -1.70    2.20
  -3  -5   8  596.04   14.40
   3  -5  -8  563.14   13.90
   3   5  -8  576.04   14.70
  -3   5   8  601.84   14.90
  -2  -5   8   13.10    2.60
   2  -5  -8    9.20    2.20
  -2   5   8    8.80    2.10
   2   5  -8    5.90    2.20
  -2   5   8   10.90    2.50
   2   5  -8   11.10    2.00
   1  -5  -8  101.99    4.50
  -1  -5   8  116.59    5.00
  -1   5   8  100.29    5.20
   1   5  -8  107.39    5.20
  -1   5   8  109.99    5.30
   1   5  -8  115.39    5.00
   0  -5  -8    1.30    1.30
   0  -5   8    3.90    1.70
   0   5  -8    3.40    2.00
   0   5   8    6.80    2.30
   0   5   8    8.00    2.50
   0   5  -8    0.60    2.00
  -1  -5  -8  516.65   12.20
  -1  -5  -8  479.55   10.60
   1  -5   8  497.15   11.20
  -1   5  -8  499.05   12.90
   1   5   8  493.55   13.20
   2  -5   8    9.80    2.20
  -2  -5  -8    6.80    2.00
  -2   5  -8    5.40    2.50
   2   5   8    4.50    2.40
   3  -5   8   64.89    4.30
  -3  -5  -8   61.29    4.20
   3   5   8   49.70    4.90
  -3   5  -8   65.19    5.40
  -4  -5  -8    7.40    2.40
   4  -5   8    7.70    2.40
   4   5   8    5.70    3.20
  -4   5  -8    6.50    3.10
   4   5   8    7.20    3.60
  -5  -5  -8   40.20    4.00
   5  -5   8   36.40    3.70
   5   5   8   40.80    4.50
  -5   5  -8   50.89    5.50
   5   5   8   45.90    5.40
  -6  -5  -8    5.50    2.70
   6  -5   8    0.00    2.20
   6   5   8    3.80    3.30
  -6   5  -8    1.30    3.10
  -7  -5  -8   63.69    5.30
   7  -5   8   69.39    5.20
  -7   5  -8   73.29    6.70
   7   5   8   76.49    7.10
   7  -6  -8    9.10    3.00
  -7  -6   8    9.50    3.70
  -7   6   8    8.90    3.40
   7   6  -8    9.10    3.80
  -6  -6   8   13.50    3.70
   6  -6  -8   19.90    3.60
   6   6  -8   13.30    3.80
  -6   6   8   15.30    3.70
   5  -6  -8   14.90    3.20
  -5  -6   8   13.60    3.60
   5   6  -8   16.70    3.70
  -5   6   8   18.60    4.00
   4  -6  -8   14.20    3.00
  -4  -6   8   13.40    3.30
  -4   6   8   18.90    3.90
   4   6  -8   14.60    3.70
  -3  -6   8  126.39    6.40
   3  -6  -8  130.49    6.00
   3   6  -8  106.99    6.10
  -3   6   8  122.59    6.70
  -2  -6   8   26.20    3.40
   2  -6  -8   30.00    3.30
   2   6  -8   31.90    3.90
  -2   6   8   27.30    3.80
  -1  -6   8   48.50    4.00
   1  -6  -8   61.09    3.80
  -1   6   8   43.50    4.30
   1   6  -8   56.59    4.20
  -1   6   8   55.39    4.60
   1   6  -8   61.49    5.00
   0  -6   8  123.19    5.30
   0  -6  -8  128.39    5.00
   0   6  -8  123.59    6.10
   0   6  -8  130.99    6.00
   0   6   8  121.39    6.40
   0   6   8  128.59    6.30
   1  -6   8   20.60    3.10
  -1  -6  -8   18.00    3.00
   1  -6   8   16.30    2.30
   1   6   8   19.80    3.50
  -1   6  -8   16.20    3.20
   2  -6   8   18.10    2.90
  -2  -6  -8   18.80    3.10
  -2   6  -8   18.30    3.50
   2   6   8   14.00    3.50
   3  -6   8  143.19    6.10
  -3  -6  -8  139.19    6.30
   3   6   8  168.98    8.40
  -3   6  -8  132.89    7.30
   4  -6   8    2.70    2.30
  -4  -6  -8    5.00    2.50
  -4   6  -8   12.40    3.60
   4   6   8    5.60    3.50
  -5  -6  -8   28.10    3.70
   5  -6   8   21.80    3.50
  -5   6  -8   33.30    5.10
   5   6   8   23.00    4.80
   6  -6   8   34.90    4.20
  -6  -6  -8   29.10    4.00
   6   6   8   29.60    5.40
  -6   6  -8   26.60    4.90
  -6  -7   8   21.10    4.20
   6  -7  -8   16.30    3.70
  -6   7   8   10.20    3.70
   6   7  -8   19.50    4.40
   5  -7  -8   51.69    5.20
  -5  -7   8   56.89    5.50
  -5   7   8   63.99    6.20
   5   7  -8   67.69    6.20
   4  -7  -8   14.50    3.20
  -4  -7   8   17.90    3.60
   4   7  -8   15.40    3.70
  -4   7   8   17.60    4.00
   3  -7  -8    2.30    2.30
  -3  -7   8    2.90    2.80
  -3   7   8    7.40    3.30
   3   7  -8    3.50    3.10
  -2  -7   8   29.80    3.90
   2  -7  -8   18.80    3.10
   2   7  -8   25.90    4.10
  -2   7   8   38.90    4.70
   1  -7  -8    3.30    1.90
  -1  -7   8    0.20    2.10
   1   7  -8    2.90    2.90
  -1   7   8    1.10    2.60
  -1   7   8    0.10    2.20
   0  -7   8   31.90    3.30
   0   7   8   32.60    4.40
   0   7  -8   24.00    3.90
   0   7  -8   28.50    3.80
   1  -7   8    8.60    2.80
  -1  -7  -8    7.20    2.70
  -1   7  -8    7.90    3.00
   1   7   8    7.40    3.30
  -2  -7  -8   27.20    3.50
   2  -7   8   24.40    3.50
  -2   7  -8   32.70    4.40
   2   7   8   37.60    5.20
  -3  -7  -8    8.40    2.70
   3  -7   8    7.40    2.90
  -3   7  -8    9.20    3.40
   3   7   8   12.70    3.70
  -4  -7  -8    6.40    2.70
   4  -7   8   15.00    3.20
  -4   7  -8   16.30    4.20
   4   7   8   11.20    4.00
   5  -7   8   16.50    3.50
  -5  -7  -8   27.40    4.10
  -5   7  -8   24.90    4.70
   5   7   8   19.60    4.90
   4  -8  -8   30.70    4.20
  -4  -8   8   31.30    4.60
   4   8  -8   39.20    5.30
  -4   8   8   42.10    5.50
   3  -8  -8    2.80    2.50
  -3  -8   8   -0.30    2.80
   3   8  -8    2.40    2.90
  -3   8   8    3.50    3.10
  -2  -8   8    0.60    2.80
   2  -8  -8   -0.30    1.80
   2   8  -8   -3.40    2.80
  -2   8   8   -1.90    2.80
  -1  -8   8    7.50    2.80
   1   8  -8    6.80    3.20
  -1   8   8    8.70    3.20
   0  -8  -8  148.39    7.20
   0   8  -8  160.58    7.80
   0   8   8  151.18    8.00
  -1  -8  -8   18.90    3.50
   1  -8   8   14.80    3.30
   1   8   8   20.70    4.30
  -1   8  -8   17.00    3.70
   2  -8   8   36.20    4.30
  -2  -8  -8   42.40    4.70
   2   8   8   30.40    4.90
  -2   8  -8   48.60    5.60
   3  -8   8    2.00    2.80
  -3  -8  -8    1.70    2.60
   3   8   8   -6.40    3.00
  -3   8  -8    1.50    3.10
   4  -8   8  100.59    6.30
  -4  -8  -8  100.39    6.20
   4   8   8  106.49    8.90
  -4   8  -8  104.99    8.40
  -9   0   9   55.59    5.30
   9   0  -9   51.79    5.20
  -8   0   9    1.20    2.50
   8   0  -9    2.60    2.20
  -7   0   9   27.90    3.60
   7   0  -9   18.20    2.90
   6   0  -9    1.00    1.30
  -6   0   9   -0.20    1.80
  -6   0   9    1.40    1.20
   6   0  -9    2.00    1.80
   5   0  -9  246.98    6.30
  -5   0   9  241.48    6.20
   5   0  -9  231.38    6.80
  -5   0   9  240.18    6.90
   4   0  -9    2.90    1.10
   4   0  -9    3.10    1.40
  -4   0   9    3.40    1.50
  -4   0   9    3.00    1.20
   3   0  -9   73.79    2.90
   3   0  -9   79.59    3.10
  -3   0   9   86.49    3.40
  -3   0   9   78.09    3.00
  -2   0   9   11.20    1.40
   2   0  -9   13.50    1.50
  -2   0   9   11.20    1.50
   2   0  -9    8.10    1.30
  -1   0   9  401.46    8.30
   1   0  -9  408.16    8.10
  -1   0   9  408.96    8.20
   1   0  -9  403.36    8.30
   0   0   9    1.00    1.00
   0   0  -9    0.50    0.90
  -1   0  -9  362.66    7.40
   1   0   9  371.46    7.40
   1   0   9  360.46    7.90
  -1   0  -9  358.76    7.80
   2   0   9   19.00    1.60
  -2   0  -9   20.10    1.80
  -2   0  -9   23.50    1.80
   2   0   9   19.70    1.90
  -3   0  -9  109.69    4.00
  -3   0  -9  103.59    3.60
   3   0   9  119.39    4.20
   3   0   9  109.39    3.70
   4   0   9   21.10    2.20
   4   0   9   13.70    2.10
  -4   0  -9   15.50    2.10
  -4   0  -9   13.20    1.90
   5   0   9   49.80    3.30
  -5   0  -9   50.69    3.30
  -5   0  -9   45.90    3.30
   5   0   9   45.80    3.40
   6   0   9    9.80    2.20
  -6   0  -9    8.10    2.00
  -7   0  -9   32.40    3.60
   7   0   9   25.20    3.30
   8   0   9    0.40    2.30
  -8   0  -9    9.00    2.80
  -9   0  -9   29.90    4.10
   9   0   9   23.00    3.90
   9  -1  -9    5.60    2.80
  -9  -1   9    4.60    2.90
   9   1  -9    5.90    3.20
  -9   1   9    1.20    3.00
   8  -1  -9   20.70    3.30
  -8  -1   9   17.00    3.40
  -8   1   9   24.70    3.80
   8   1  -9   21.40    3.60
   7  -1  -9  397.36   10.70
   7  -1  -9  405.56   10.10
  -7  -1   9  414.36   10.90
  -7   1   9  385.36   11.20
   7   1  -9  397.66   11.40
  -6  -1   9   68.09    4.00
  -6  -1   9   68.19    3.60
   6  -1  -9   69.29    3.60
   6  -1  -9   62.89    3.80
  -6   1   9   67.09    4.50
   6   1  -9   67.99    4.40
  -5  -1   9   12.70    1.90
  -5  -1   9   15.80    2.20
   5  -1  -9   12.10    1.90
   5  -1  -9   15.10    2.10
   5   1  -9   12.70    2.30
   5   1  -9   12.00    1.40
  -5   1   9   13.10    1.50
  -5   1   9   17.00    2.50
  -4  -1   9    4.90    1.40
  -4  -1   9    3.40    1.40
   4  -1  -9    2.80    1.30
   4  -1  -9    5.40    1.40
   4   1  -9    3.00    1.70
  -4   1   9    4.90    1.80
   4   1  -9    3.70    1.00
  -4   1   9    3.10    1.00
   3  -1  -9  490.75   10.60
  -3  -1   9  502.45   10.10
  -3  -1   9  482.95   10.50
   3  -1  -9  494.95   10.00
  -3   1   9  508.65   11.00
   3   1  -9  496.95    9.90
  -3   1   9  496.65    9.90
   3   1  -9  507.75   10.90
  -2  -1   9  101.19    2.90
  -2  -1   9   98.39    3.50
   2  -1  -9  100.39    2.80
  -2   1   9  103.39    3.20
  -2   1   9  101.39    3.80
   2   1  -9  101.49    3.10
   2   1  -9   95.29    3.60
   1  -1  -9  608.64   12.10
  -1  -1   9  620.04   11.20
  -1  -1   9  604.44   12.20
   1  -1  -9  628.84   11.00
   1   1  -9  628.14   12.10
  -1   1   9  636.34   12.50
   1   1  -9  632.04   12.40
  -1   1   9  612.14   12.20
   0  -1   9  325.67    7.10
   0  -1  -9  330.77    7.00
   0   1   9  336.67    7.50
   0   1   9  323.87    5.90
   0   1  -9  333.57    7.40
   0   1  -9  322.57    6.00
   0   1   9  328.67    7.50
  -1  -1  -9  567.74   11.00
  -1  -1  -9  559.14   11.30
   1  -1   9  570.44   11.10
   1  -1   9  561.24   11.20
  -1   1  -9  567.24   10.40
   1   1   9  559.24   10.40
   1   1   9  562.44   11.80
  -2  -1  -9   76.89    2.80
  -2  -1  -9   75.39    3.00
   2  -1   9   70.19    2.90
   2  -1   9   72.49    2.70
   2   1   9   71.89    3.50
  -2   1  -9   75.39    2.50
  -2   1  -9   76.29    3.50
   2   1   9   70.19    2.50
  -3  -1  -9   86.29    3.50
  -3  -1  -9   86.39    3.20
   3  -1   9   85.09    3.40
   3  -1   9   81.19    3.10
   3   1   9   88.19    3.10
  -3   1  -9   80.19    3.80
  -3   1  -9   87.09    3.10
   3   1   9   83.39    4.00
   4  -1   9   12.50    2.00
   4  -1   9    9.00    1.60
  -4  -1  -9   11.30    2.00
  -4  -1  -9   11.60    1.70
   4   1   9    5.90    2.10
   4   1   9    9.00    1.60
  -4   1  -9   13.70    1.90
  -4   1  -9    8.90    2.00
   5  -1   9  187.98    6.00
  -5  -1  -9  181.38    6.10
  -5   1  -9  185.18    6.60
   5   1   9  187.68    6.60
   5   1   9  179.28    5.90
  -5   1  -9  197.28    6.00
   6  -1   9   10.00    2.10
  -6  -1  -9    6.80    2.10
  -6   1  -9    9.70    2.50
  -6   1  -9    7.30    2.00
   6   1   9   10.30    2.60
   6   1   9    9.40    2.20
  -7  -1  -9   97.49    5.30
   7  -1   9  100.89    5.30
   7   1   9  100.29    5.30
  -7   1  -9   91.19    5.00
  -8  -1  -9    5.20    2.50
   8  -1   9    4.40    2.50
  -8   1  -9    5.60    2.40
   8   1   9    7.30    2.70
   9  -1   9    4.30    2.80
  -9  -1  -9    3.90    2.70
  -9   1  -9   -0.80    2.20
   9   1   9    1.00    2.60
   9  -2  -9    9.00    3.10
  -9  -2   9    6.40    2.90
  -9   2   9   10.40    3.50
   9   2  -9    1.80    3.10
  -8  -2   9    2.30    2.30
   8  -2  -9   -0.10    1.80
   8  -2  -9    0.20    2.00
  -8   2   9    2.30    2.80
   8   2  -9    4.90    2.80
   7  -2  -9   75.49    4.40
   7  -2  -9   79.19    4.50
  -7  -2   9   80.29    4.60
  -7  -2   9   82.69    4.50
   7   2  -9   80.69    5.10
  -7   2   9   82.59    5.50
   6  -2  -9  274.37    8.10
  -6  -2   9  263.17    7.70
  -6  -2   9  276.27    8.10
   6  -2  -9  272.37    7.60
   6   2  -9  274.87    8.60
  -6   2   9  258.77    8.70
   5  -2  -9    8.20    1.70
  -5  -2   9   14.00    2.30
  -5  -2   9    9.20    1.80
   5  -2  -9   10.30    2.00
   5   2  -9   11.20    2.50
  -5   2   9   13.50    2.60
  -4  -2   9  121.59    3.90
   4  -2  -9  122.09    4.60
  -4  -2   9  117.59    4.50
   4  -2  -9  122.69    3.90
   4   2  -9  124.09    3.50
   4   2  -9  136.99    5.20
  -4   2   9  126.49    5.30
  -4   2   9  120.79    3.60
  -3  -2   9  144.39    4.90
   3  -2  -9  140.39    3.70
  -3  -2   9  132.89    3.70
   3  -2  -9  140.09    4.70
   3   2  -9  138.29    3.90
  -3   2   9  144.69    4.10
  -3   2   9  142.89    5.10
   3   2  -9  139.89    5.10
   2  -2  -9  260.47    5.10
  -2  -2   9  242.08    6.50
  -2  -2   9  254.07    5.20
   2  -2  -9  247.08    6.40
   2   2  -9  252.77    6.00
   2   2  -9  255.77    6.90
  -2   2   9  252.97    6.90
  -2   2   9  260.37    6.20
  -1  -2   9  340.57    7.90
   1  -2  -9  348.37    7.80
   1   2  -9  341.67    7.70
  -1   2   9  355.86    8.50
   1   2  -9  341.17    8.30
  -1   2   9  353.86    8.10
   0  -2  -9  710.83   13.50
   0  -2   9  696.23   13.60
   0   2   9  703.73   14.40
   0   2  -9  692.83   14.00
   0   2  -9  699.63   14.20
   0   2   9  673.53   14.30
   1  -2   9  490.95    9.80
  -1  -2  -9  494.25    9.70
   1  -2   9  470.25   10.40
  -1  -2  -9  492.05   10.60
  -1   2  -9  490.55    9.10
   1   2   9  490.75    9.20
  -1   2  -9  498.15   10.90
   1   2   9  464.65   11.00
   2  -2   9   35.90    1.90
  -2  -2  -9   37.00    1.90
  -2  -2  -9   39.40    2.60
   2  -2   9   41.40    2.80
   2   2   9   36.10    3.20
  -2   2  -9   38.70    1.90
   2   2   9   40.30    2.00
  -2   2  -9   33.40    2.90
  -3  -2  -9  278.17    6.20
   3  -2   9  279.47    7.30
   3  -2   9  275.17    6.30
  -3  -2  -9  274.57    7.20
   3   2   9  278.77    6.70
   3   2   9  283.67    8.30
  -3   2  -9  277.97    6.60
  -3   2  -9  277.57    8.00
   4  -2   9  106.49    4.30
  -4  -2  -9  109.99    4.50
  -4   2  -9  108.89    4.10
  -4   2  -9  111.49    5.30
   4   2   9  111.99    5.40
   4   2   9  109.49    4.20
   5  -2   9  120.29    5.00
  -5  -2  -9  121.79    5.10
  -5   2  -9  116.39    4.70
   5   2   9  118.99    6.00
   5   2   9  117.79    4.90
  -5   2  -9  127.39    5.80
  -6  -2  -9  144.19    6.00
   6  -2   9  135.69    5.70
  -6   2  -9  147.49    5.80
  -6   2  -9  140.39    6.50
   6   2   9  142.39    5.80
   6   2   9  138.69    6.70
   7  -2   9   25.40    3.20
  -7  -2  -9   19.50    3.20
   7   2   9   27.90    3.50
  -7   2  -9   17.20    3.30
  -7   2  -9   21.40    3.10
  -8  -2  -9    8.80    2.80
   8  -2   9    4.80    2.60
  -8   2  -9    6.20    2.60
   8   2   9    4.00    2.70
  -9  -3   9   38.90    4.50
   9  -3  -9   39.70    4.30
  -9   3   9   31.60    4.60
   9   3  -9   38.00    5.30
   8  -3  -9   11.60    2.60
  -8  -3   9   10.50    2.70
   8  -3  -9    9.50    2.70
  -8  -3   9    8.20    2.80
   8   3  -9   11.90    3.30
  -8   3   9   11.00    3.60
   7  -3  -9   11.10    2.40
   7  -3  -9   10.60    2.70
  -7  -3   9    9.70    2.70
  -7  -3   9   15.50    2.80
  -7   3   9    9.60    3.30
   7   3  -9   13.40    3.10
  -6  -3   9  357.66   10.00
   6  -3  -9  359.56   10.10
  -6  -3   9  346.07    9.00
   6  -3  -9  344.17    8.90
   6   3  -9  340.67   10.40
  -6   3   9  343.17   10.70
  -5  -3   9   56.79    4.00
  -5  -3   9   48.10    3.00
   5  -3  -9   52.89    3.80
   5  -3  -9   46.50    2.90
   5   3  -9   50.69    4.20
  -5   3   9   47.30    4.20
   4  -3  -9  123.09    3.80
  -4  -3   9  125.59    4.00
  -4  -3   9  120.79    5.20
   4  -3  -9  121.19    5.00
  -4   3   9  119.59    5.60
   4   3  -9  116.19    5.20
   3  -3  -9   38.50    1.90
  -3  -3   9   39.30    2.10
  -3  -3   9   42.30    3.30
   3  -3  -9   44.20    3.00
  -3   3   9   36.40    3.40
   3   3  -9   50.09    3.70
   3   3  -9   43.00    2.40
  -3   3   9   43.30    2.60
  -2  -3   9  338.97    8.50
  -2  -3   9  327.67    6.60
   2  -3  -9  329.47    8.20
   2  -3  -9  331.67    6.50
   2   3  -9  339.47    7.80
  -2   3   9  326.07    8.80
   2   3  -9  329.17    8.80
  -2   3   9  337.57    8.10
  -1  -3   9   39.10    1.30
   1  -3  -9   43.10    2.70
   1  -3  -9   39.70    1.30
  -1  -3   9   40.40    2.90
   1   3  -9   40.00    3.00
   1   3  -9   43.60    2.80
  -1   3   9   43.90    3.00
  -1   3   9   41.30    3.20
   0  -3  -9  540.35   11.00
   0  -3   9  538.65   11.30
   0   3  -9  538.35   12.10
   0   3  -9  507.05   11.70
   0   3   9  536.35   12.20
   0   3   9  527.75   12.10
   0   3   9  545.95    9.90
  -1  -3  -9   43.60    2.80
  -1  -3  -9   46.50    2.20
   1  -3   9   52.59    3.20
   1  -3   9   48.80    2.40
   1   3   9   39.90    3.20
   1   3   9   49.99    2.10
  -1   3  -9   47.90    1.90
  -1   3  -9   52.59    3.40
  -2  -3  -9  401.06    9.60
  -2  -3  -9  398.16    8.20
   2  -3   9  411.66    9.60
   2  -3   9  391.76    8.30
  -2   3  -9  398.16   10.30
   2   3   9  399.76    8.60
   2   3   9  392.56   10.60
  -2   3  -9  414.66    8.50
  -3  -3  -9  240.68    5.80
  -3  -3  -9  227.38    6.80
   3  -3   9  237.78    5.60
   3  -3   9  231.78    6.90
   3   3   9  245.98    6.40
  -3   3  -9  253.47    6.30
  -3   3  -9  237.78    7.80
   3   3   9  242.68    8.10
  -4  -3  -9   66.79    4.00
   4  -3   9   56.69    3.70
   4   3   9   57.69    4.80
  -4   3  -9   59.99    3.30
   4   3   9   57.19    3.30
  -4   3  -9   52.29    4.30
   5  -3   9   91.89    4.60
  -5  -3  -9   93.39    4.80
  -5   3  -9   89.59    5.70
  -5   3  -9   92.59    4.40
   5   3   9   89.09    5.70
   5   3   9   88.19    4.50
  -6  -3  -9   31.50    3.30
   6  -3   9   36.50    3.60
   6   3   9   43.00    4.80
  -6   3  -9   31.50    3.30
  -6   3  -9   38.20    4.50
   6   3   9   38.50    3.80
  -7  -3  -9    7.10    2.70
   7  -3   9    7.40    2.50
   7   3   9   11.40    2.80
   7   3   9    9.50    3.40
  -7   3  -9    6.00    3.10
  -7   3  -9    4.30    2.40
   8  -3   9   20.90    3.50
  -8  -3  -9   13.90    3.30
  -8   3  -9   13.60    3.00
   8   3   9   21.30    3.80
   8  -4  -9   53.29    5.00
  -8  -4   9   63.59    5.00
  -8  -4   9   52.29    5.00
  -8   4   9   55.79    5.80
   8   4  -9   45.60    5.20
  -7  -4   9    9.70    3.00
  -7  -4   9    5.00    2.30
   7  -4  -9    6.60    2.60
   7   4  -9   13.20    3.50
  -7   4   9   12.40    3.40
  -6  -4   9   15.30    2.40
  -6  -4   9   13.80    3.00
   6  -4  -9   12.70    3.30
   6  -4  -9    8.90    2.60
  -6   4   9   16.20    3.50
   6   4  -9   13.10    3.30
   5  -4  -9   10.30    2.70
   5  -4  -9   12.30    1.80
  -5  -4   9   10.60    1.90
  -5  -4   9   13.90    2.80
  -5   4   9   11.30    3.10
   5   4  -9   10.90    3.00
  -4  -4   9  465.15   10.20
   4  -4  -9  472.35   11.90
   4  -4  -9  470.55   10.10
  -4  -4   9  482.65   12.20
  -4   4   9  463.35   12.50
   4   4  -9  473.15   12.30
   3  -4  -9   30.90    3.10
  -3  -4   9   26.50    2.00
  -3  -4   9   31.80    3.30
   3  -4  -9   31.10    1.90
   3   4  -9   35.80    3.70
  -3   4   9   29.30    2.60
   3   4  -9   33.60    2.50
  -3   4   9   24.90    3.30
  -2  -4   9  394.36   10.10
   2  -4  -9  399.96    9.80
  -2  -4   9  384.16    7.90
   2  -4  -9  392.56    7.90
   2   4  -9  393.16   10.50
   2   4  -9  403.56    9.40
  -2   4   9  395.66    9.80
  -2   4   9  408.86   10.70
   1  -4  -9    3.00    1.40
  -1  -4   9    1.80    1.50
   1  -4  -9    1.80    0.80
  -1  -4   9    2.50    0.90
  -1   4   9    3.00    1.80
  -1   4   9    4.80    2.00
   1   4  -9    3.60    1.80
   1   4  -9   -1.20    1.50
   0  -4  -9   74.19    3.20
   0  -4   9   75.79    3.60
   0   4   9   71.49    2.90
   0   4   9   80.59    4.50
   0   4  -9   73.99    4.10
   0   4   9   69.19    4.30
   0   4  -9   78.39    4.40
  -1  -4  -9   -0.90    0.90
   1  -4   9   -1.30    1.00
  -1  -4  -9   -1.80    1.60
  -1   4  -9   -0.60    1.80
   1   4   9    2.10    1.90
   1   4   9    0.40    1.00
  -2  -4  -9  522.05   12.20
   2  -4   9  499.25   10.60
  -2  -4  -9  512.75   10.30
   2  -4   9  538.45   12.20
  -2   4  -9  508.55   10.90
  -2   4  -9  479.95   12.80
   2   4   9  531.55   11.00
   2   4   9  531.15   13.50
  -3  -4  -9    6.40    2.20
   3  -4   9    5.50    2.10
  -3   4  -9    5.30    1.60
   3   4   9    3.80    1.50
   3   4   9    7.90    2.90
  -3   4  -9    8.90    2.70
  -4  -4  -9   80.89    4.30
   4  -4   9   77.69    4.30
   4   4   9   81.09    4.00
  -4   4  -9   65.49    5.10
   4   4   9   86.49    5.50
  -4   4  -9   79.09    4.00
  -5  -4  -9    9.20    2.50
   5  -4   9   11.20    2.50
   5   4   9   10.70    2.30
  -5   4  -9   11.70    2.30
   5   4   9   17.10    3.70
  -5   4  -9    9.00    2.90
   6  -4   9    1.90    2.30
  -6  -4  -9    5.60    2.40
  -6   4  -9    0.40    1.90
   6   4   9    5.00    2.20
  -6   4  -9    3.10    2.90
   6   4   9    1.30    3.00
   7  -4   9   11.00    3.00
  -7  -4  -9    6.90    2.90
  -7   4  -9   13.20    3.50
   7   4   9    9.30    3.60
   7   4   9    3.80    2.70
   8  -4   9  116.29    6.30
  -8  -4  -9  120.29    6.40
  -8   4  -9  110.29    7.70
   8   4   9  118.89    7.00
  -8  -5   9   40.60    4.80
   8  -5  -9   36.20    4.60
  -8   5   9   42.70    5.20
   8   5  -9   61.79    6.20
   7  -5  -9    4.60    2.70
  -7  -5   9    5.60    2.90
   7   5  -9    0.30    3.00
  -7   5   9    3.10    3.00
  -6  -5   9    7.30    3.10
   6  -5  -9    5.30    2.60
  -6   5   9   12.00    3.50
   6   5  -9    4.70    3.30
  -5  -5   9    4.30    2.80
   5  -5  -9   -0.70    2.00
  -5   5   9   -1.90    2.20
   5   5  -9    5.20    2.80
  -4  -5   9  151.68    6.60
   4  -5  -9  162.28    6.60
  -4   5   9  166.88    7.20
   4   5  -9  157.18    7.30
  -3  -5   9    8.10    2.30
   3  -5  -9    7.40    2.30
  -3   5   9    4.90    2.70
   3   5  -9    6.60    2.50
  -2  -5   9  339.57    9.60
   2  -5  -9  332.57    9.10
   2   5  -9  337.27    8.90
  -2   5   9  310.27    9.80
   2   5  -9  348.37   10.20
  -2   5   9  335.17    9.30
   1  -5  -9    2.20    1.50
  -1  -5   9   -0.60    1.60
   1   5  -9   -0.50    1.80
  -1   5   9    0.10    1.80
   1   5  -9    1.80    1.90
  -1   5   9    4.30    2.50
   0  -5   9   54.59    3.40
   0  -5  -9   57.49    3.20
   0   5   9   46.10    4.10
   0   5  -9   52.89    4.20
   0   5   9   52.99    4.50
   0   5  -9   41.10    3.80
  -1  -5  -9    7.50    1.50
   1  -5   9    8.40    1.70
  -1  -5  -9    6.50    2.20
  -1   5  -9   11.50    2.70
   1   5   9    8.50    2.70
  -2  -5  -9  171.38    6.40
   2  -5   9  188.28    6.80
  -2   5  -9  189.38    7.60
   2   5   9  195.98    7.80
   3  -5   9   21.30    3.10
  -3  -5  -9   15.40    2.60
   3   5   9    6.80    2.90
  -3   5  -9   19.00    3.40
  -4  -5  -9   19.50    3.10
   4  -5   9   16.40    2.80
  -4   5  -9   29.10    4.30
   4   5   9   18.70    3.70
   5  -5   9   -1.40    2.10
  -5  -5  -9    2.40    2.30
  -5   5  -9    5.90    3.20
   5   5   9   -1.80    3.10
  -6  -5  -9   18.70    3.40
   6  -5   9   18.20    3.20
  -6   5  -9   20.70    4.40
   6   5   9   19.80    4.40
  -7  -5  -9    3.10    2.80
   7  -5   9    1.60    2.40
  -7   5  -9    7.20    3.50
   7   5   9    5.30    3.80
  -7  -6   9    6.00    3.20
   7  -6  -9    9.90    3.20
  -7   6   9    5.70    3.50
   7   6  -9    4.10    3.50
  -6  -6   9   15.30    3.60
   6  -6  -9   18.00    3.60
   6   6  -9   11.20    3.90
  -6   6   9    9.40    3.60
  -5  -6   9    0.60    2.90
   5  -6  -9    3.90    2.50
   5   6  -9   -1.00    2.60
  -5   6   9    1.70    3.00
   4  -6  -9   46.40    4.50
  -4  -6   9   36.10    4.10
  -4   6   9   31.50    4.50
   4   6  -9   34.00    4.70
  -3  -6   9   14.80    3.10
   3  -6  -9   14.90    2.80
  -3   6   9   12.50    3.30
   3   6  -9   14.70    3.10
  -2  -6   9    6.70    2.60
   2  -6  -9    7.40    2.30
   2   6  -9    5.00    2.80
  -2   6   9    3.90    2.80
  -1  -6   9   67.89    4.50
   1  -6  -9   76.69    4.20
   1   6  -9   73.49    4.60
  -1   6   9   77.89    5.00
  -1   6   9   68.49    5.20
   1   6  -9   70.69    4.90
   0  -6   9  390.56   10.20
   0  -6  -9  387.26    9.70
   0   6   9  378.26   11.50
   0   6  -9  380.66   11.20
   0   6   9  376.46   11.10
   0   6  -9  391.76   11.10
  -1  -6  -9   12.60    2.80
   1  -6   9    8.00    2.00
   1  -6   9   14.10    2.90
  -1   6  -9    7.60    2.80
   1   6   9   11.30    3.10
   2  -6   9   12.70    2.80
  -2  -6  -9    9.10    2.60
  -2   6  -9   11.90    3.20
   2   6   9    6.80    3.20
  -3  -6  -9   16.20    2.80
   3  -6   9   18.50    2.90
   3   6   9   24.70    4.30
  -3   6  -9   21.20    3.90
   4  -6   9   17.20    3.20
  -4  -6  -9   11.80    3.00
   4   6   9   17.40    4.40
  -4   6  -9   14.70    3.80
   5  -6   9   43.10    4.30
  -5  -6  -9   47.80    4.30
   5   6   9   49.20    6.00
  -5   6  -9   50.19    5.90
  -6  -6  -9   38.30    4.50
   6  -6   9   44.90    4.60
  -6   6  -9   41.80    5.70
   6   6   9   43.20    6.10
  -6  -7   9    3.60    3.30
   6  -7  -9    7.20    3.20
   6   7  -9   10.00    4.00
  -6   7   9    5.50    3.60
  -5  -7   9   47.50    5.20
   5  -7  -9   42.30    4.80
  -5   7   9   41.00    5.20
   5   7  -9   43.70    5.60
   4  -7  -9   16.00    3.30
  -4  -7   9   14.50    3.60
  -4   7   9   16.90    4.00
   4   7  -9   14.50    4.00
  -3  -7   9    4.30    2.90
   3  -7  -9    1.90    2.30
   3   7  -9    4.60    3.10
  -3   7   9    6.80    3.30
  -2  -7   9   37.30    4.20
   2  -7  -9   32.50    3.70
   2   7  -9   38.40    4.80
  -2   7   9   34.30    4.30
  -1  -7   9    2.20    2.20
   1  -7  -9    1.60    1.70
  -1   7   9    2.80    2.80
  -1   7   9    0.30    2.40
   1   7  -9    4.70    3.00
   0  -7   9   20.50    2.90
   0   7  -9   17.30    3.50
   0   7   9   22.20    4.00
   0   7  -9   23.60    3.70
  -1  -7  -9   37.30    4.30
   1  -7   9   31.00    4.00
   1   7   9   31.80    4.50
  -1   7  -9   22.60    3.90
   2  -7   9   31.20    3.90
  -2  -7  -9   29.30    3.80
  -2   7  -9   24.80    4.10
   2   7   9   34.40    5.00
  -3  -7  -9    6.40    2.70
   3  -7   9    7.20    2.80
   3   7   9    8.60    3.80
  -3   7  -9   12.30    3.70
   4  -7   9    5.70    2.70
  -4  -7  -9    7.30    2.80
   4   7   9    4.80    3.60
  -4   7  -9    5.10    3.40
   5  -7   9   31.90    4.20
  -5  -7  -9   27.40    3.90
  -5   7  -9   29.90    4.90
   5   7   9   29.50    5.60
   4  -8  -9    1.00    2.60
  -4  -8   9    1.70    2.90
   4   8  -9   -1.20    3.10
  -4   8   9   -0.30    3.00
   3  -8  -9   11.30    3.00
  -3  -8   9    5.90    3.30
   3   8  -9   10.20    3.60
  -3   8   9    3.70    3.10
  -2  -8   9    6.50    3.10
   2  -8  -9    8.50    2.60
  -2   8   9    6.10    3.30
   2   8  -9   10.30    3.50
  -1  -8   9   31.40    3.90
   1   8  -9   28.70    4.40
  -1   8   9   21.30    4.00
   0  -8  -9   21.80    3.70
   0   8   9   33.40    4.70
   0   8  -9   22.70    4.00
   1  -8   9   18.00    3.60
  -1  -8  -9    8.80    3.10
   1   8   9   10.90    3.60
  -1   8  -9   18.10    3.70
   2  -8   9    1.20    2.60
  -2  -8  -9   -0.60    2.50
  -2   8  -9    5.40    3.30
   2   8   9   12.70    4.10
   3  -8   9    5.90    2.90
  -3  -8  -9    1.00    2.60
   3   8   9    2.70    3.60
  -3   8  -9    3.40    3.50
   9   0 -10    6.00    3.00
  -9   0  10    9.50    3.10
   8   0 -10   11.80    3.00
  -8   0  10   17.10    3.50
  -7   0  10    1.20    2.30
   7   0 -10    0.70    1.90
   6   0 -10    7.70    2.10
  -6   0  10    3.80    2.10
   6   0 -10    6.70    1.60
  -6   0  10    6.90    1.60
  -5   0  10    2.40    1.80
   5   0 -10    3.50    1.70
  -5   0  10    2.30    1.30
   5   0 -10    2.80    1.30
   4   0 -10 1167.58   22.10
  -4   0  10 1154.08   21.60
   4   0 -10 1142.69   21.60
  -4   0  10 1145.69   22.20
   3   0 -10    9.00    1.30
  -3   0  10    9.90    1.40
  -3   0  10   12.20    1.70
   3   0 -10   10.80    1.60
   2   0 -10   27.80    1.90
  -2   0  10   28.90    2.00
  -2   0  10   28.30    2.00
   2   0 -10   26.90    2.00
   1   0 -10    4.30    1.10
  -1   0  10    7.80    1.30
   1   0 -10    4.20    1.10
  -1   0  10    6.00    1.30
   0   0  10  608.44   11.20
   0   0 -10  598.74   11.20
   0   0 -10  583.94   11.60
   0   0  10  585.04   11.80
  -1   0 -10   18.00    1.40
   1   0  10   14.60    1.40
   1   0  10   18.00    1.90
  -1   0 -10   12.10    1.50
  -2   0 -10  186.28    5.10
   2   0  10  180.88    4.60
  -2   0 -10  175.58    4.60
   2   0  10  181.18    5.20
   3   0  10   22.60    2.40
   3   0  10   19.40    2.00
  -3   0 -10   18.70    2.10
  -3   0 -10   20.60    1.90
  -4   0 -10    1.40    1.50
   4   0  10    3.00    1.70
  -4   0 -10    2.60    1.40
   4   0  10    0.80    1.20
  -5   0 -10   16.70    2.30
   5   0  10   16.10    2.50
  -5   0 -10   12.50    2.20
   5   0  10   12.10    2.10
   6   0  10    2.10    1.90
  -6   0 -10    2.40    1.90
  -7   0 -10    2.90    2.20
   7   0  10    1.40    2.10
   8   0  10   27.70    3.80
  -8   0 -10   22.80    3.60
   9   0  10   -2.50    2.40
  -9   0 -10    1.10    2.40
   9  -1 -10    1.90    2.60
  -9  -1  10    3.60    2.90
  -9   1  10   -0.20    3.00
   9   1 -10   -3.70    2.60
  -8  -1  10   55.39    4.90
   8  -1 -10   49.80    4.60
   8   1 -10   44.10    4.50
  -8   1  10   53.89    5.20
   7  -1 -10   54.59    3.60
   7  -1 -10   55.59    4.10
  -7  -1  10   38.90    3.80
  -7   1  10   56.69    4.90
   7   1 -10   42.40    4.20
   6  -1 -10  135.59    5.10
   6  -1 -10  136.79    5.30
  -6  -1  10  152.18    5.70
  -6  -1  10  147.19    5.10
   6   1 -10  143.89    6.00
  -6   1  10  155.58    6.30
  -5  -1  10    6.10    1.60
  -5  -1  10    4.30    1.70
   5  -1 -10    4.40    1.60
   5  -1 -10    6.00    1.60
  -5   1  10    3.30    2.00
  -5   1  10    5.00    1.20
   5   1 -10    6.70    1.30
   5   1 -10    6.60    1.90
  -4  -1  10  102.39    3.70
   4  -1 -10   97.39    3.60
   4  -1 -10   88.59    3.80
  -4  -1  10  100.29    3.90
   4   1 -10   96.49    3.30
   4   1 -10   93.19    4.20
  -4   1  10  100.09    3.30
  -4   1  10  106.79    4.50
  -3  -1  10   50.29    2.40
  -3  -1  10   46.80    2.80
   3  -1 -10   49.50    2.70
   3  -1 -10   43.80    2.20
   3   1 -10   48.10    2.30
  -3   1  10   52.19    3.20
   3   1 -10   50.89    3.00
  -3   1  10   45.50    2.30
   2  -1 -10   60.09    2.10
  -2  -1  10   58.59    2.70
  -2  -1  10   60.99    2.30
   2  -1 -10   61.39    2.70
   2   1 -10   65.89    3.00
   2   1 -10   53.99    2.40
  -2   1  10   58.09    2.50
  -2   1  10   63.49    3.10
   1  -1 -10   28.40    1.20
   1  -1 -10   24.30    1.90
  -1  -1  10   26.40    1.40
  -1  -1  10   27.70    2.10
  -1   1  10   28.30    2.30
   1   1 -10   27.30    2.00
  -1   1  10   29.70    2.20
   1   1 -10   30.80    2.30
   0  -1  10  966.50   17.80
   0  -1 -10  943.21   17.70
   0   1 -10  965.50   16.60
   0   1 -10  962.90   18.00
   0   1  10  965.90   18.10
   0   1  10  923.41   18.20
   0   1  10  952.90   16.50
   0   1 -10  925.61   18.00
  -1  -1 -10  193.48    5.00
   1  -1  10  183.68    4.80
  -1  -1 -10  184.18    4.60
   1  -1  10  181.58    4.80
   1   1  10  183.48    5.40
   1   1  10  179.78    4.00
  -1   1 -10  187.68    5.30
  -1   1 -10  180.98    4.00
  -2  -1 -10   13.30    1.50
   2  -1  10   11.50    1.50
   2  -1  10    9.20    1.50
  -2  -1 -10   10.80    1.60
   2   1  10    9.20    1.20
   2   1  10    9.10    1.90
  -2   1 -10   12.30    1.90
  -2   1 -10   10.40    1.20
  -3  -1 -10    1.00    1.10
   3  -1  10    1.80    1.30
  -3  -1 -10    1.50    1.30
   3  -1  10    2.00    1.20
  -3   1 -10    0.90    1.50
  -3   1 -10    2.00    1.10
   3   1  10    1.20    1.70
   3   1  10    1.80    1.10
  -4  -1 -10   64.29    3.40
   4  -1  10   59.29    3.20
   4  -1  10   62.59    3.30
  -4  -1 -10   60.89    3.10
   4   1  10   64.19    3.10
   4   1  10   60.69    3.90
  -4   1 -10   54.39    3.00
  -4   1 -10   59.49    3.70
   5  -1  10   38.40    3.10
  -5  -1 -10   45.80    3.10
  -5   1 -10   46.10    3.10
   5   1  10   43.50    3.80
   5   1  10   41.90    3.10
  -5   1 -10   51.59    4.00
   6  -1  10    5.40    2.10
  -6  -1 -10    2.00    1.90
   6   1  10    3.10    2.00
   6   1  10    1.60    2.30
  -6   1 -10    2.90    1.90
  -6   1 -10    4.80    2.30
  -7  -1 -10    0.80    2.20
   7  -1  10    6.60    2.40
   7   1  10   -0.10    2.00
  -7   1 -10    3.40    2.20
  -8  -1 -10    5.70    2.30
   8  -1  10    9.60    3.00
  -8   1 -10    2.20    2.10
   8   1  10    5.30    2.60
  -9  -1 -10    8.40    3.00
   9  -1  10    6.40    3.00
   9   1  10    9.00    3.30
  -9   1 -10    4.80    2.60
   9  -2 -10   46.80    4.70
  -9  -2  10   53.99    5.20
  -9   2  10   44.70    5.50
   9   2 -10   40.20    4.90
  -8  -2  10   26.30    3.70
   8  -2 -10   19.10    2.90
   8  -2 -10   22.70    3.30
  -8   2  10   19.10    3.80
   8   2 -10   26.10    4.10
   7  -2 -10   50.49    3.80
  -7  -2  10   53.29    3.90
   7  -2 -10   44.70    3.90
  -7  -2  10   55.49    4.40
   7   2 -10   46.30    4.50
  -7   2  10   45.40    4.70
   6  -2 -10   65.79    3.70
  -6  -2  10   69.29    4.10
   6  -2 -10   71.29    4.10
  -6  -2  10   60.89    3.80
  -6   2  10   66.99    4.80
   6   2 -10   60.49    4.60
   5  -2 -10   30.70    2.90
  -5  -2  10   33.30    3.10
   5  -2 -10   33.30    2.50
  -5  -2  10   33.40    2.70
   5   2 -10   29.50    3.20
  -5   2  10   33.60    3.40
   4  -2 -10   34.80    2.80
  -4  -2  10   43.50    2.40
   4  -2 -10   35.60    2.20
  -4  -2  10   39.70    3.10
  -4   2  10   37.50    3.50
   4   2 -10   43.70    3.20
  -4   2  10   35.40    2.10
   4   2 -10   38.70    2.10
  -3  -2  10  241.28    6.80
   3  -2 -10  245.28    5.50
  -3  -2  10  245.38    5.60
   3  -2 -10  241.98    6.60
  -3   2  10  244.68    6.00
  -3   2  10  246.48    7.10
   3   2 -10  246.58    5.80
   3   2 -10  253.97    7.20
  -2  -2  10  407.36    7.70
  -2  -2  10  396.46    9.20
   2  -2 -10  397.26    7.60
   2  -2 -10  414.76    9.20
   2   2 -10  395.66    9.50
  -2   2  10  400.46    9.70
  -2   2  10  395.96    8.90
   2   2 -10  408.26    8.70
  -1  -2  10  479.85   10.30
   1  -2 -10  487.65   10.20
   1   2 -10  489.75   10.80
  -1   2  10  466.45   10.50
   1   2 -10  474.25   10.20
  -1   2  10  497.35   10.90
   0  -2  10  689.83   13.40
   0  -2 -10  693.63   13.20
   0   2 -10  682.33   14.00
   0   2  10  657.63   14.00
   0   2 -10  651.73   13.80
   0   2  10  662.23   14.00
   1  -2  10  125.09    3.70
   1  -2  10  121.89    4.20
  -1  -2 -10  108.29    4.00
  -1  -2 -10  119.49    3.50
  -1   2 -10  112.79    4.40
  -1   2 -10  121.29    2.80
   1   2  10  123.89    4.80
   1   2  10  120.99    3.00
  -2  -2 -10    5.20    1.40
   2  -2  10    5.70    1.60
   2  -2  10    7.30    1.20
  -2  -2 -10    6.10    1.10
   2   2  10    5.00    1.80
  -2   2 -10    4.10    1.70
   2   2  10    5.10    1.10
  -2   2 -10    5.10    1.00
   3  -2  10  112.39    4.30
  -3  -2 -10  120.79    4.50
   3  -2  10  121.69    3.70
  -3  -2 -10  112.39    3.60
  -3   2 -10  115.99    3.80
   3   2  10  117.99    3.90
  -3   2 -10  119.59    5.10
   3   2  10  117.99    5.30
   4  -2  10  158.08    5.50
  -4  -2 -10  165.28    5.60
  -4   2 -10  166.28    6.30
   4   2  10  171.48    6.80
  -4   2 -10  160.58    5.00
   4   2  10  167.48    5.20
   5  -2  10   89.99    4.50
  -5  -2 -10   99.79    4.70
  -5   2 -10   84.19    5.10
  -5   2 -10   90.59    4.20
   5   2  10   87.49    4.20
   5   2  10   87.69    5.30
   6  -2  10  270.07    8.20
  -6  -2 -10  256.57    8.20
   6   2  10  246.68    9.00
   6   2  10  269.57    8.20
  -6   2 -10  263.17    8.00
  -6   2 -10  256.87    8.80
   7  -2  10    8.60    2.40
  -7  -2 -10   11.70    2.80
   7   2  10   13.60    2.90
  -7   2 -10   13.70    2.80
  -7   2 -10    5.20    2.80
   8  -2  10   37.40    4.30
  -8  -2 -10   37.80    4.20
  -8   2 -10   36.60    4.20
   8   2  10   39.80    4.40
  -9  -3  10   45.70    4.70
   9   3 -10   31.90    4.80
  -9   3  10   50.39    5.80
  -8  -3  10   27.10    3.50
   8  -3 -10   28.60    3.80
  -8  -3  10   23.90    3.40
   8  -3 -10   24.00    3.30
  -8   3  10   19.20    3.90
   8   3 -10   31.50    4.60
  -7  -3  10   19.90    2.80
   7  -3 -10   17.10    2.60
   7  -3 -10   19.60    3.00
  -7  -3  10   15.60    3.00
   7   3 -10   15.20    3.20
  -7   3  10   13.30    3.60
  -6  -3  10   81.99    4.80
  -6  -3  10   82.49    4.10
   6  -3 -10   82.19    3.90
   6  -3 -10   68.29    4.60
  -6   3  10   82.59    5.50
   6   3 -10   74.09    5.30
  -5  -3  10   80.79    4.60
   5  -3 -10   77.09    4.40
   5  -3 -10   79.09    3.50
  -5  -3  10   78.69    3.60
  -5   3  10   83.49    5.20
   5   3 -10   71.49    4.90
  -4  -3  10    2.60    1.20
   4  -3 -10    2.70    1.00
  -4  -3  10    2.00    1.90
   4  -3 -10    2.60    1.70
   4   3 -10   -0.30    1.90
  -4   3  10    3.10    2.00
   3  -3 -10  142.69    3.70
  -3  -3  10  146.79    3.90
  -3  -3  10  146.59    5.30
   3  -3 -10  157.58    5.40
   3   3 -10  138.99    4.30
  -3   3  10  145.29    5.90
   3   3 -10  149.19    5.80
  -3   3  10  153.08    4.80
  -2  -3  10   25.60    2.60
   2  -3 -10   18.30    2.10
  -2  -3  10   25.00    1.30
   2  -3 -10   23.70    1.20
   2   3 -10   28.70    2.30
  -2   3  10   24.60    2.40
   2   3 -10   31.60    3.20
  -2   3  10   29.60    3.10
   1  -3 -10  183.38    5.30
  -1  -3  10  176.18    5.40
  -1  -3  10  176.78    3.30
   1   3 -10  168.58    5.70
   1   3 -10  189.08    5.50
  -1   3  10  174.88    5.70
  -1   3  10  165.58    5.80
   0  -3  10    6.90    1.50
   0  -3 -10    5.50    1.30
   0   3  10    4.30    1.90
   0   3 -10    5.20    1.90
   0   3  10    5.50    0.60
   0   3 -10    4.30    1.60
   0   3  10    3.60    1.70
   1  -3  10  416.46    9.00
  -1  -3 -10  419.96    9.90
   1  -3  10  425.56    9.90
  -1  -3 -10  413.76    8.80
  -1   3 -10  410.56   10.20
  -1   3 -10  410.06    8.10
   1   3  10  407.76    8.20
   1   3  10  410.76   10.60
   2  -3  10   34.80    2.90
  -2  -3 -10   44.60    3.00
   2  -3  10   41.30    2.30
  -2  -3 -10   39.90    2.00
  -2   3 -10   36.30    3.40
  -2   3 -10   40.80    2.10
   2   3  10   38.10    3.60
   2   3  10   39.50    2.20
   3  -3  10   50.89    3.30
  -3  -3 -10   66.69    3.80
   3  -3  10   54.59    2.50
  -3  -3 -10   54.39    2.90
   3   3  10   60.19    4.60
  -3   3 -10   53.99    2.80
  -3   3 -10   57.39    4.30
   3   3  10   58.99    3.00
  -4  -3 -10  198.08    6.70
   4  -3  10  190.68    6.40
   4   3  10  208.48    7.90
  -4   3 -10  202.98    6.00
  -4   3 -10  206.08    7.60
   4   3  10  189.58    6.00
  -5  -3 -10    4.80    2.10
   5  -3  10   11.00    2.40
   5   3  10   13.40    3.20
  -5   3 -10    7.40    2.00
   5   3  10   11.50    2.30
  -5   3 -10    8.90    3.00
  -6  -3 -10  110.59    5.50
   6  -3  10  105.29    5.40
   6   3  10  115.59    6.90
   6   3  10  111.49    5.40
  -6   3 -10  119.99    5.40
  -6   3 -10  115.49    6.50
   7  -3  10   65.29    4.60
  -7  -3 -10   67.39    5.00
  -7   3 -10   63.29    4.60
  -7   3 -10   72.69    6.10
   7   3  10   64.99    5.00
   7   3  10   59.49    5.70
   8  -3  10    9.20    2.70
  -8  -3 -10   10.90    3.10
  -8   3 -10    9.60    2.80
   8   3  10   12.90    3.20
   8  -4 -10   26.70    3.80
  -8  -4  10    9.50    3.10
  -8   4  10   17.20    4.00
   8   4 -10   20.50    4.40
   7  -4 -10   25.70    3.70
  -7  -4  10   23.50    3.80
  -7   4  10   28.40    4.30
   7   4 -10   28.20    4.60
  -6  -4  10   56.89    4.90
   6  -4 -10   43.60    4.30
  -6   4  10   38.20    4.50
   6   4 -10   43.90    4.70
  -5  -4  10  138.99    6.10
  -5  -4  10  161.28    6.90
   5  -4 -10  136.39    6.10
   5   4 -10  140.89    6.70
  -5   4  10  149.99    7.00
  -4  -4  10   53.49    4.30
   4  -4 -10   58.49    4.10
   4   4 -10   57.19    4.30
  -4   4  10   60.29    4.90
   3  -4 -10 1102.89   22.40
  -3  -4  10 1120.79   22.70
   3   4 -10 1112.39   23.30
   3   4 -10 1108.69   21.30
  -3   4  10 1100.79   21.70
  -3   4  10 1080.39   23.30
   2  -4 -10   12.10    2.10
  -2  -4  10   13.30    2.30
   2   4 -10   12.90    2.60
   2   4 -10   15.30    2.10
  -2   4  10   11.50    2.40
  -2   4  10   11.50    2.10
   1  -4 -10   15.90    2.10
  -1  -4  10   17.10    2.30
   1   4 -10   20.40    2.40
  -1   4  10   14.10    2.40
  -1   4  10   16.80    2.70
   1   4 -10   21.00    2.80
   0  -4 -10    5.50    1.40
   0  -4  10    4.40    1.50
   0   4 -10    5.80    2.10
   0   4  10    2.70    1.90
   0   4 -10    4.30    2.00
   0   4  10    3.80    2.00
  -1  -4 -10  253.77    7.60
   1  -4  10  248.28    6.50
  -1  -4 -10  254.77    6.30
   1   4  10  259.97    8.40
  -1   4 -10  267.87    8.10
   2  -4  10   25.80    3.00
  -2  -4 -10   26.10    1.90
  -2  -4 -10   30.70    3.10
   2  -4  10   27.20    2.10
  -2   4 -10   25.10    3.30
   2   4  10   29.70    3.70
   3  -4  10  482.75   11.60
  -3  -4 -10  452.05   11.40
   3   4  10  457.25   10.60
  -3   4 -10  463.35   12.50
   3   4  10  471.85   13.10
   4  -4  10   24.60    3.10
  -4  -4 -10   25.10    3.20
   4   4  10   20.50    3.70
   4   4  10   21.60    2.50
  -4   4 -10   22.20    3.70
  -5  -4 -10   12.20    2.60
   5  -4  10   10.90    2.40
  -5   4 -10   16.20    3.50
   5   4  10   17.70    4.00
   5   4  10   15.80    2.50
  -6  -4 -10    1.90    2.10
   6  -4  10   -1.00    1.90
   6   4  10   -0.70    1.90
  -6   4 -10   -2.90    2.60
   6   4  10    2.70    3.20
   7  -4  10    7.90    3.00
  -7  -4 -10    5.30    2.80
  -7   4 -10    6.40    3.30
   7   4  10    2.40    3.30
   7   4  10    5.70    2.70
  -8  -4 -10   27.70    4.20
   8  -4  10   31.80    4.30
   8   4  10   29.20    6.00
  -8   4 -10   30.90    5.00
  -8  -5  10    4.20    3.00
   8  -5 -10    3.50    2.50
  -8   5  10   -4.30    2.70
   8   5 -10    3.90    3.50
  -7  -5  10   15.20    3.50
   7  -5 -10   14.20    3.30
  -7   5  10   14.20    4.00
   7   5 -10   28.30    4.70
   6  -5 -10    5.90    2.70
  -6  -5  10    4.30    2.70
  -6   5  10    8.30    3.10
   6   5 -10    3.60    2.80
   5  -5 -10  112.29    5.90
  -5  -5  10  112.29    6.30
  -5   5  10   98.59    6.50
   5   5 -10  120.29    6.80
  -4  -5  10    4.80    2.30
   4  -5 -10    6.40    2.30
   4   5 -10    8.50    3.00
  -4   5  10   10.30    3.00
   3  -5 -10   13.00    2.50
  -3  -5  10    8.90    2.70
   3   5 -10   10.70    3.10
  -3   5  10    7.80    2.80
  -2  -5  10   13.50    2.50
   2  -5 -10   13.70    2.40
  -2   5  10    7.00    2.50
  -2   5  10   11.60    2.40
   2   5 -10    8.70    2.90
   2   5 -10   10.70    2.10
   1  -5 -10  152.68    5.50
  -1  -5  10  146.19    5.70
   1   5 -10  156.18    6.00
   1   5 -10  153.68    6.50
  -1   5  10  148.09    6.30
  -1   5  10  146.39    6.60
   0  -5 -10    4.60    1.50
   0  -5  10    1.30    1.60
   0   5 -10    0.30    2.10
   0   5  10    2.10    2.10
   0   5 -10    1.90    2.10
   0   5  10    3.70    2.20
  -1  -5 -10   15.10    2.60
   1  -5  10   13.60    2.00
  -1  -5 -10   12.80    1.70
  -1   5 -10   12.00    2.80
   1   5  10   10.80    2.90
  -2  -5 -10   21.40    2.90
   2  -5  10   25.00    3.20
  -2   5 -10   29.40    3.90
   2   5  10   19.00    3.60
  -3  -5 -10    9.80    2.40
   3  -5  10    9.30    2.60
  -3   5 -10   13.70    3.10
   3   5  10   11.50    3.30
   4  -5  10    7.60    2.40
  -4  -5 -10    1.70    2.30
  -4   5 -10    4.30    3.00
   4   5  10    7.50    3.40
  -5  -5 -10   67.59    4.90
   5  -5  10   46.40    4.30
  -5   5 -10   53.49    5.60
   5   5  10   55.79    5.90
  -6  -5 -10   16.80    3.20
   6  -5  10   22.70    3.60
  -6   5 -10   24.00    4.40
   6   5  10   24.20    4.80
   7  -5  10   -1.00    2.40
  -7  -5 -10   -3.50    2.50
  -7   5 -10    0.10    3.20
   7   5  10   -1.50    3.60
  -7  -6  10  114.49    7.10
   7  -6 -10  100.89    6.70
  -7   6  10  112.09    7.80
   7   6 -10  116.39    8.00
  -6  -6  10   13.50    3.40
   6  -6 -10    8.30    3.10
  -6   6  10    6.80    3.60
   6   6 -10    6.10    3.40
   5  -6 -10   25.80    3.90
  -5  -6  10   18.60    3.80
  -5   6  10   24.60    4.50
   5   6 -10   18.70    3.90
   4  -6 -10   32.50    3.80
  -4  -6  10   32.00    4.20
   4   6 -10   36.90    4.80
  -4   6  10   21.60    3.80
  -3  -6  10   67.79    5.20
   3  -6 -10   65.99    4.60
   3   6 -10   57.59    5.10
  -3   6  10   76.39    6.10
  -2  -6  10    8.40    2.60
   2  -6 -10    8.00    2.20
   2   6 -10    7.10    3.00
  -2   6  10    8.50    3.00
  -1  -6  10  296.57    9.20
   1  -6 -10  309.07    8.80
   1   6 -10  306.67   10.20
   1   6 -10  318.37    9.50
  -1   6  10  327.17   10.40
  -1   6  10  312.77    9.90
   0  -6  10   64.79    4.20
   0  -6 -10   65.59    3.70
   0   6 -10   78.09    5.10
   0   6 -10   71.29    4.90
   0   6  10   61.79    5.10
   0   6  10   68.39    5.20
  -1  -6 -10   33.60    3.60
   1  -6  10   27.70    3.30
   1  -6  10   39.40    3.20
   1   6  10   34.90    4.20
  -1   6 -10   30.30    3.90
  -2  -6 -10   13.80    2.90
   2  -6  10   14.80    3.00
  -2   6 -10   13.40    3.40
   2   6  10   12.90    3.40
   3  -6  10   67.09    4.60
  -3  -6 -10   71.69    4.90
  -3   6 -10   79.69    6.40
   3   6  10   63.59    5.80
  -4  -6 -10   13.10    3.00
   4  -6  10   13.40    3.10
   4   6  10   15.00    4.30
  -4   6 -10   10.60    3.70
   5  -6  10   98.39    5.90
  -5  -6 -10   91.29    5.80
   5   6  10   77.79    7.00
  -5   6 -10   94.49    7.50
  -6  -6 -10   10.80    3.20
   6  -6  10   12.70    3.20
   6   6  10   18.10    4.50
  -6   6 -10   17.00    4.20
  -6  -7  10   -1.90    2.70
   6  -7 -10   -0.30    2.60
   6   7 -10    0.10    3.40
  -6   7  10    4.40    3.50
  -5  -7  10    3.40    3.10
   5  -7 -10    3.90    2.80
  -5   7  10   12.70    4.00
   5   7 -10    1.50    3.60
   4  -7 -10   22.40    3.60
  -4  -7  10   31.00    4.50
  -4   7  10   29.90    4.70
   4   7 -10   32.60    5.00
  -3  -7  10    4.30    2.90
   3  -7 -10    4.60    2.40
  -3   7  10    8.10    3.00
   3   7 -10    4.70    3.10
   2  -7 -10   22.60    3.10
  -2  -7  10   20.80    3.60
  -2   7  10   20.70    4.10
   2   7 -10   14.20    3.50
   1  -7 -10    8.20    2.20
  -1  -7  10   14.60    3.00
   1   7 -10   11.00    3.40
  -1   7  10   11.20    3.30
  -1   7  10    9.10    3.00
   0  -7  10   15.70    2.70
   0   7 -10   18.10    3.50
   0   7 -10   17.20    3.50
   0   7  10   25.30    4.10
   1  -7  10   15.30    3.30
  -1  -7 -10   19.30    3.40
  -1   7 -10   18.00    3.80
   1   7  10   19.30    3.90
  -2  -7 -10   17.00    3.20
   2  -7  10   20.60    3.60
  -2   7 -10   27.90    4.50
   2   7  10   17.80    4.00
  -3  -7 -10   14.50    3.30
   3  -7  10   15.20    3.40
   3   7  10   18.20    4.30
  -3   7 -10   14.60    3.80
  -4  -7 -10    1.30    2.50
   4  -7  10    0.90    2.60
  -4   7 -10    9.10    3.60
   4   7  10    1.50    3.30
  -5  -7 -10   27.00    4.20
   5  -7  10   16.60    3.50
  -5   7 -10   27.50    5.10
   5   7  10   21.90    5.20
  -4  -8  10    2.00    3.00
   4  -8 -10    1.60    2.50
   4   8 -10   -1.10    3.20
  -4   8  10    0.60    3.10
   3  -8 -10   12.40    3.10
  -3  -8  10    6.90    3.30
   3   8 -10   15.70    4.20
  -3   8  10   12.70    3.80
   2  -8 -10   50.39    4.60
  -2  -8  10   51.69    5.00
   2   8 -10   50.79    5.60
  -2   8  10   53.39    5.60
  -1  -8  10    9.50    3.00
   1   8 -10    4.90    3.30
  -1   8  10   10.90    3.50
   0  -8 -10   45.60    4.80
   0   8  10   43.10    5.20
   0   8 -10   43.10    4.90
   1  -8  10    3.40    2.80
  -1  -8 -10    3.70    2.80
   1   8  10   -0.80    3.00
  -1   8 -10    2.70    3.00
   2  -8  10   43.00    4.80
  -2  -8 -10   53.59    5.10
   2   8  10   50.59    6.10
  -2   8 -10   56.29    5.90
   3  -8  10    8.10    3.20
  -3  -8 -10    6.10    2.90
   3   8  10    7.10    3.90
  -3   8 -10   14.90    3.90
  -9   0  11    2.90    3.00
   9   0 -11    4.40    2.90
  -8   0  11    2.60    2.60
   8   0 -11    1.40    2.30
  -7   0  11   99.49    5.50
   7   0 -11   98.29    5.30
   6   0 -11    0.90    1.80
  -6   0  11    0.80    2.00
   6   0 -11    0.40    1.20
  -6   0  11    0.50    1.30
   5   0 -11   95.79    3.80
  -5   0  11   95.99    4.40
   5   0 -11   98.89    4.30
  -5   0  11   93.59    3.70
   4   0 -11    5.70    1.40
   4   0 -11    5.40    1.60
  -4   0  11    6.20    1.40
  -4   0  11    7.20    1.80
  -3   0  11  447.96    9.80
   3   0 -11  462.75    9.80
  -3   0  11  476.55   10.10
   3   0 -11  467.25   10.00
   2   0 -11    6.60    1.30
  -2   0  11    7.90    1.30
  -2   0  11    5.20    1.30
   2   0 -11    7.00    1.30
   1   0 -11  100.09    3.10
  -1   0  11   98.89    3.30
  -1   0  11  105.19    3.30
   1   0 -11  101.19    3.40
   0   0 -11   22.40    1.60
   0   0  11   23.80    1.70
   0   0  11   27.50    2.20
   0   0 -11   24.70    2.00
  -1   0 -11  284.77    6.20
   1   0  11  288.57    7.00
  -1   0 -11  287.27    6.80
   1   0  11  287.97    6.20
  -2   0 -11   23.70    2.10
   2   0  11   25.40    1.90
   2   0  11   23.40    2.10
  -2   0 -11   29.20    2.00
  -3   0 -11  431.46    9.40
  -3   0 -11  435.96    9.90
   3   0  11  433.66    9.30
   3   0  11  425.56   10.00
  -4   0 -11    3.30    1.50
   4   0  11    3.40    1.80
  -4   0 -11    5.30    1.70
   4   0  11    4.30    1.60
  -5   0 -11   33.20    3.10
   5   0  11   32.10    2.90
  -5   0 -11   39.00    3.30
   5   0  11   35.90    3.30
  -6   0 -11   -2.90    1.60
   6   0  11   -1.30    1.60
   7   0  11  106.59    5.50
  -7   0 -11  115.79    5.60
  -8   0 -11   -4.40    1.90
   8   0  11   -0.40    2.20
   9  -1 -11    5.10    2.80
  -9  -1  11    3.00    2.90
  -9   1  11    7.70    3.40
   9   1 -11    6.60    3.10
  -8  -1  11   -1.70    2.40
   8  -1 -11    1.10    2.10
   8   1 -11   -1.30    2.40
  -8   1  11   -2.70    2.60
   7  -1 -11    1.40    1.90
  -7  -1  11    1.90    2.10
   7  -1 -11    4.10    1.80
   7   1 -11    5.20    2.20
  -7   1  11    1.80    2.40
   6  -1 -11   19.20    2.50
   6  -1 -11   13.80    2.30
  -6  -1  11   17.10    2.60
  -6  -1  11   17.30    2.30
   6   1 -11   16.90    2.80
  -6   1  11   19.50    3.10
   5  -1 -11   31.80    2.70
  -5  -1  11   29.20    2.60
   5  -1 -11   28.50    2.70
  -5  -1  11   33.70    2.90
  -5   1  11   27.60    3.00
   5   1 -11   29.60    3.00
  -5   1  11   31.00    2.10
   5   1 -11   35.60    2.30
  -4  -1  11   14.40    2.00
  -4  -1  11   15.70    1.90
   4  -1 -11   17.00    1.90
   4  -1 -11   16.70    2.10
   4   1 -11   17.00    1.70
  -4   1  11   15.40    2.40
   4   1 -11   18.50    2.30
  -4   1  11   19.60    1.80
   3  -1 -11   87.89    3.00
  -3  -1  11   80.39    3.50
   3  -1 -11   79.69    3.40
  -3  -1  11   84.59    3.10
  -3   1  11   85.99    3.20
   3   1 -11   80.89    3.00
  -3   1  11   92.39    3.90
   3   1 -11   88.19    3.80
  -2  -1  11   21.90    2.00
   2  -1 -11   21.00    1.60
  -2  -1  11   21.70    1.60
   2  -1 -11   20.70    1.90
  -2   1  11   17.40    2.10
   2   1 -11   20.00    2.00
  -2   1  11   19.30    1.80
   2   1 -11   20.20    1.80
   1  -1 -11  139.69    4.10
  -1  -1  11  145.39    4.30
  -1  -1  11  142.89    3.30
   1  -1 -11  143.39    3.10
  -1   1  11  138.99    4.30
   1   1 -11  139.19    4.30
  -1   1  11  136.49    4.50
   1   1 -11  133.49    4.10
   0  -1 -11   50.09    2.50
   0  -1  11   47.80    2.30
   0   1  11   48.90    2.70
   0   1 -11   46.20    1.50
   0   1  11   49.40    2.80
   0   1  11   50.99    1.50
   0   1 -11   53.59    2.80
   1  -1  11 2039.20   35.90
   1  -1  11 1943.21   35.70
  -1  -1 -11 1987.30   35.90
  -1  -1 -11 2039.70   35.70
  -1   1 -11 2006.70   34.80
   1   1  11 2045.20   34.80
   1   1  11 2014.40   36.60
  -1   1 -11 1960.00   36.30
  -2  -1 -11   40.60    2.50
   2  -1  11   46.30    2.70
   2  -1  11   46.00    2.60
  -2  -1 -11   45.20    2.50
   2   1  11   46.40    3.20
   2   1  11   48.50    2.10
  -2   1 -11   50.49    3.20
  -2   1 -11   45.60    2.10
  -3  -1 -11   45.00    2.60
  -3  -1 -11   46.00    2.80
   3  -1  11   49.80    2.90
   3  -1  11   44.60    2.70
  -3   1 -11   42.80    2.40
   3   1  11   46.00    2.40
   3   1  11   44.60    3.40
  -3   1 -11   41.20    3.10
   4  -1  11   14.50    2.00
   4  -1  11   10.90    2.00
  -4  -1 -11   10.30    1.80
  -4  -1 -11   11.90    2.20
  -4   1 -11   16.00    2.00
   4   1  11   12.60    2.40
  -4   1 -11   13.00    2.40
   4   1  11   11.30    1.80
   5  -1  11  157.38    5.60
  -5  -1 -11  151.08    5.60
   5   1  11  157.98    6.40
  -5   1 -11  159.18    5.40
   5   1  11  153.68    5.40
  -5   1 -11  153.28    6.10
  -6  -1 -11    9.00    2.40
   6  -1  11   16.10    2.50
  -6   1 -11   13.80    2.50
  -6   1 -11   11.00    2.60
   6   1  11    8.80    2.20
   7  -1  11   59.69    4.60
  -7  -1 -11   67.99    4.70
   7   1  11   62.29    4.50
  -7   1 -11   66.19    4.50
  -8  -1 -11   13.70    3.00
   8  -1  11   10.30    2.90
   8   1  11   11.40    3.00
  -8   1 -11    6.70    2.40
  -9  -2  11   51.79    5.00
   9  -2 -11   58.69    5.20
   9   2 -11   57.09    5.80
  -9   2  11   57.79    5.70
  -8  -2  11   71.09    5.00
   8  -2 -11   76.49    5.10
   8  -2 -11   65.59    4.50
  -8   2  11   61.69    5.60
   8   2 -11   61.59    5.50
  -7  -2  11   61.49    4.20
   7  -2 -11   57.79    4.20
   7  -2 -11   66.59    4.20
  -7  -2  11   64.79    4.10
   7   2 -11   55.39    5.10
  -7   2  11   64.39    5.50
   6  -2 -11   36.80    3.10
  -6  -2  11   48.40    3.80
  -6  -2  11   48.70    3.70
   6  -2 -11   50.79    3.70
  -6   2  11   53.49    4.60
   6   2 -11   47.30    4.30
  -5  -2  11   95.09    4.60
   5  -2 -11  110.29    4.80
   5  -2 -11  105.29    4.10
  -5  -2  11  105.29    4.20
   5   2 -11  110.29    5.20
  -5   2  11  106.09    5.10
  -4  -2  11   16.00    2.20
  -4  -2  11   15.40    1.80
   4  -2 -11   15.10    2.10
   4  -2 -11   20.90    1.90
  -4   2  11   19.20    2.80
   4   2 -11   17.60    2.60
   4   2 -11   19.70    1.80
  -4   2  11   17.30    1.70
   3  -2 -11  487.75   11.00
  -3  -2  11  454.15   10.80
  -3  -2  11  476.05    9.80
   3  -2 -11  512.45    9.70
   3   2 -11  501.75   10.20
  -3   2  11  490.95   10.40
   3   2 -11  492.45   11.50
  -3   2  11  503.05   11.60
  -2  -2  11  142.99    3.40
  -2  -2  11  146.39    4.80
   2  -2 -11  146.99    3.20
   2  -2 -11  144.49    4.60
   2   2 -11  141.79    4.40
  -2   2  11  141.29    5.20
   2   2 -11  146.99    5.20
  -2   2  11  143.69    4.50
  -1  -2  11 1054.89   19.90
   1  -2 -11 1024.40   19.70
  -1   2  11 1018.40   20.10
   1   2 -11 1065.09   20.40
   1   2 -11 1030.00   19.90
  -1   2  11 1048.60   20.50
   0  -2  11  566.14   11.60
   0  -2 -11  566.24   11.50
   0   2 -11  565.94   12.20
   0   2 -11  551.74   12.10
   0   2  11  566.44   12.40
   0   2  11  601.94   12.50
   1  -2  11   60.39    3.20
  -1  -2 -11   61.09    2.60
   1  -2  11   65.89    2.80
  -1  -2 -11   61.59    3.00
   1   2  11   61.49    2.00
  -1   2 -11   63.69    3.50
   1   2  11   62.09    3.50
  -1   2 -11   63.59    1.80
  -2  -2 -11   89.39    3.70
   2  -2  11   86.49    3.20
   2  -2  11   81.99    3.70
  -2  -2 -11   89.09    3.10
  -2   2 -11   91.99    2.80
   2   2  11   78.19    4.30
   2   2  11   91.79    2.90
  -2   2 -11   85.49    4.20
   3  -2  11   93.19    4.00
  -3  -2 -11   81.09    3.70
  -3  -2 -11   87.49    3.20
   3  -2  11   80.19    3.20
  -3   2 -11   85.69    3.20
   3   2  11   86.39    3.30
  -3   2 -11   83.49    4.40
   3   2  11   94.59    4.90
  -4  -2 -11   56.89    3.70
   4  -2  11   63.49    3.70
  -4   2 -11   60.29    4.50
  -4   2 -11   64.59    3.20
   4   2  11   61.69    4.60
   4   2  11   60.89    3.20
  -5  -2 -11  171.08    6.20
   5  -2  11  174.38    6.10
  -5   2 -11  174.68    6.90
  -5   2 -11  171.58    5.70
   5   2  11  165.58    7.20
   5   2  11  174.78    5.90
   6  -2  11   15.90    2.70
  -6  -2 -11   13.00    2.60
  -6   2 -11   15.40    3.20
   6   2  11   14.70    2.60
  -6   2 -11   16.70    2.60
   6   2  11   11.70    3.00
  -7  -2 -11    7.40    2.60
   7  -2  11    5.10    2.40
  -7   2 -11    9.50    2.50
   7   2  11    7.00    2.40
  -7   2 -11    3.60    2.80
  -8  -2 -11   31.40    3.90
   8  -2  11   39.00    4.50
   8   2  11   38.20    4.50
  -8   2 -11   41.00    4.40
  -9  -3  11    3.00    2.70
  -9   3  11    0.70    3.30
   9   3 -11    0.50    3.30
  -8  -3  11   50.39    4.50
   8  -3 -11   44.20    4.30
  -8  -3  11   42.70    4.30
  -8   3  11   36.70    4.90
   8   3 -11   46.40    5.40
  -7  -3  11   16.10    2.70
   7  -3 -11   16.80    2.60
   7  -3 -11   15.00    3.00
  -7  -3  11   24.30    3.50
  -7   3  11   19.90    3.80
   7   3 -11   12.40    3.30
  -6  -3  11   10.50    2.60
   6  -3 -11    8.60    2.50
   6  -3 -11   12.30    2.10
  -6  -3  11   14.70    2.30
  -6   3  11   10.10    2.80
   6   3 -11   14.80    3.10
  -5  -3  11   49.70    3.90
   5  -3 -11   56.49    3.00
  -5  -3  11   46.50    3.00
   5  -3 -11   50.49    3.90
   5   3 -11   43.90    3.90
  -5   3  11   49.50    4.40
  -4  -3  11   15.70    2.60
   4  -3 -11   20.60    1.80
   4  -3 -11   14.50    2.30
  -4  -3  11   15.70    1.80
  -4   3  11   16.80    3.00
  -4   3  11   16.00    1.90
   4   3 -11   19.10    2.00
   4   3 -11   19.80    3.00
  -3  -3  11   95.29    3.00
  -3  -3  11  103.99    4.70
   3  -3 -11  100.99    4.30
   3  -3 -11  103.49    3.00
  -3   3  11  100.99    4.00
  -3   3  11   92.29    4.80
   3   3 -11  104.39    3.70
   3   3 -11  104.29    5.00
  -2  -3  11   95.59    2.40
   2  -3 -11   97.79    2.30
  -2  -3  11   92.29    4.10
   2  -3 -11  102.29    4.10
  -2   3  11   90.09    4.00
   2   3 -11   93.99    3.80
   2   3 -11   88.69    4.60
  -2   3  11   92.79    4.50
  -1  -3  11   76.99    3.70
   1  -3 -11   83.79    3.50
   1   3 -11   79.49    4.20
  -1   3  11   85.59    4.00
   1   3 -11   74.79    3.60
  -1   3  11   81.29    4.10
   0  -3 -11   39.10    2.30
   0  -3  11   37.20    2.60
   0   3 -11   36.80    3.20
   0   3 -11   33.30    2.90
   0   3  11   35.60    3.20
   0   3  11   42.40    3.40
  -1  -3 -11  372.66    8.10
  -1  -3 -11  363.06    9.10
   1  -3  11  363.86    9.10
   1  -3  11  373.26    8.30
  -1   3 -11  370.56    7.40
   1   3  11  371.06   10.00
  -1   3 -11  348.77    9.40
   1   3  11  379.56    7.40
   2  -3  11  168.58    5.70
  -2  -3 -11  173.08    4.50
   2  -3  11  167.68    4.70
  -2  -3 -11  163.48    5.70
  -2   3 -11  174.38    4.50
   2   3  11  165.68    6.40
  -2   3 -11  185.38    6.50
   2   3  11  171.18    4.60
  -3  -3 -11  249.97    7.30
  -3  -3 -11  239.08    7.40
   3  -3  11  247.48    7.20
   3  -3  11  253.67    6.10
   3   3  11  257.37    8.60
   3   3  11  256.37    6.50
  -3   3 -11  262.27    8.40
  -3   3 -11  256.27    6.40
   4  -3  11  102.29    4.80
  -4  -3 -11  105.99    4.80
  -4   3 -11   99.49    4.10
   4   3  11   99.59    5.80
   4   3  11  101.59    4.30
  -4   3 -11  101.29    5.70
  -5  -3 -11   27.00    3.30
   5  -3  11   26.90    3.10
  -5   3 -11   29.00    2.90
   5   3  11   23.00    2.80
   5   3  11   26.30    3.80
  -5   3 -11   29.30    3.90
   6  -3  11   18.70    3.00
  -6  -3 -11   16.30    3.00
   6   3  11   16.80    2.80
  -6   3 -11   11.20    2.40
  -6   3 -11   17.10    3.60
   6   3  11   15.30    3.70
  -7  -3 -11   20.70    3.40
   7  -3  11   20.30    3.20
  -7   3 -11   22.30    4.10
   7   3  11   24.40    4.20
   7   3  11   15.20    3.10
  -7   3 -11   21.70    3.20
   8  -3  11   67.19    5.40
  -8  -3 -11   72.69    5.20
  -8   3 -11   76.59    8.10
   8   3  11   71.09    5.30
  -8  -4  11   20.20    3.60
   8  -4 -11   17.10    3.40
   8   4 -11   13.90    3.70
  -8   4  11   12.50    4.10
   7  -4 -11   17.20    3.00
  -7  -4  11   17.40    3.40
  -7   4  11   15.20    3.70
   7   4 -11   17.80    4.00
   6  -4 -11   84.89    5.10
  -6  -4  11   81.89    5.40
   6   4 -11   76.59    5.90
  -6   4  11   73.59    5.50
  -5  -4  11   19.50    2.90
   5  -4 -11   20.00    3.10
  -5   4  11   27.60    3.90
   5   4 -11   22.60    3.40
  -4  -4  11  811.22   18.00
   4  -4 -11  811.12   17.80
   4   4 -11  814.42   18.60
  -4   4  11  796.22   18.70
   3  -4 -11   58.59    3.90
  -3  -4  11   61.59    4.20
  -3   4  11   56.49    3.60
  -3   4  11   65.29    4.50
   3   4 -11   64.09    4.60
   3   4 -11   54.19    3.30
   2  -4 -11  376.26    9.40
  -2  -4  11  348.87    9.40
  -2   4  11  346.37   10.10
   2   4 -11  372.66    9.10
   2   4 -11  365.96   10.20
  -2   4  11  368.66    9.50
  -1  -4  11   14.10    2.30
   1  -4 -11    5.00    1.60
  -1   4  11    7.50    2.10
   1   4 -11   10.70    2.10
  -1   4  11    9.90    2.50
   1   4 -11    9.00    2.40
   0  -4 -11   27.40    2.30
   0  -4  11   29.40    2.60
   0   4 -11   24.50    2.90
   0   4 -11   24.00    2.90
   0   4  11   32.30    3.40
   0   4  11   29.50    3.30
  -1  -4 -11   46.60    3.50
  -1  -4 -11   44.40    2.50
   1  -4  11   45.60    2.80
   1  -4  11   49.10    3.80
  -1   4 -11   47.70    4.00
   1   4  11   45.80    4.10
  -2  -4 -11  923.21   19.40
   2  -4  11  950.80   19.40
   2  -4  11  907.91   17.80
  -2  -4 -11  910.11   17.50
  -2   4 -11  935.41   20.40
   2   4  11  919.51   20.80
  -3  -4 -11   79.59    4.20
   3  -4  11   67.59    4.30
   3   4  11   73.49    5.50
  -3   4 -11   68.59    5.10
   4  -4  11  220.78    7.40
  -4  -4 -11  222.28    7.30
   4   4  11  225.28    8.80
  -4   4 -11  210.98    8.50
   5  -4  11   35.40    3.70
  -5  -4 -11   27.50    3.50
   5   4  11   29.00    4.40
  -5   4 -11   35.70    4.60
   6  -4  11    8.00    2.70
  -6  -4 -11    6.30    2.60
   6   4  11   12.60    3.80
  -6   4 -11    9.90    3.40
   7  -4  11    5.00    2.40
  -7  -4 -11   -0.10    2.30
   7   4  11    3.00    3.50
  -7   4 -11    2.60    3.20
  -8  -5  11   25.30    4.20
   8  -5 -11   31.70    4.40
   8   5 -11   25.00    5.00
  -8   5  11   17.40    4.20
  -7  -5  11   10.70    3.30
   7  -5 -11   13.00    3.20
   7   5 -11    8.90    3.50
  -7   5  11    5.70    3.30
   6  -5 -11   20.70    3.50
  -6  -5  11   20.90    3.80
   6   5 -11   24.20    4.20
  -6   5  11   25.60    4.30
   5  -5 -11   19.20    3.20
  -5  -5  11   18.30    3.20
  -5   5  11   13.80    3.60
   5   5 -11   24.20    3.70
   4  -5 -11   45.10    4.00
  -4  -5  11   59.39    4.50
  -4   5  11   55.29    5.20
   4   5 -11   55.79    5.00
  -3  -5  11    3.90    2.30
   3  -5 -11    4.00    2.10
  -3   5  11    3.30    2.40
   3   5 -11    2.30    2.30
   2  -5 -11   34.20    3.30
  -2  -5  11   32.00    3.50
  -2   5  11   35.10    3.50
   2   5 -11   22.20    3.30
  -2   5  11   26.50    3.50
   2   5 -11   29.70    3.00
   1  -5 -11    8.70    1.90
  -1  -5  11    6.60    2.00
   1   5 -11    7.60    2.30
   1   5 -11    9.50    2.70
  -1   5  11    5.30    2.20
  -1   5  11    4.80    2.40
   0  -5 -11  145.59    5.00
   0  -5  11  147.49    5.40
   0   5  11  146.69    6.60
   0   5 -11  146.79    6.20
   0   5  11  151.68    6.50
   0   5 -11  146.39    6.30
  -1  -5 -11    7.60    2.20
  -1  -5 -11    9.90    1.60
   1  -5  11   11.50    2.60
   1  -5  11   11.40    1.90
  -1   5 -11   16.40    3.00
   1   5  11    9.20    2.60
  -2  -5 -11  117.69    5.60
   2  -5  11  117.09    5.30
   2   5  11  118.29    6.60
  -2   5 -11  116.99    6.20
   3  -5  11    4.10    2.40
  -3  -5 -11    3.40    2.20
   3   5  11    5.20    3.00
  -3   5 -11    2.80    2.60
   4  -5  11   60.49    4.80
  -4  -5 -11   47.50    4.10
  -4   5 -11   65.69    6.00
   4   5  11   57.49    5.80
   5  -5  11    9.80    3.00
  -5  -5 -11    6.30    2.50
   5   5  11   10.10    3.90
  -5   5 -11   10.80    3.70
  -6  -5 -11   58.29    5.10
   6  -5  11   46.00    4.40
  -6   5 -11   47.20    5.70
   6   5  11   49.40    6.20
   7  -5  11    5.20    2.90
  -7  -5 -11    2.40    2.60
  -7   5 -11    4.80    3.50
   7   5  11    2.20    3.50
  -7  -6  11   30.90    4.60
   7  -6 -11   34.10    4.40
   7   6 -11   28.90    5.00
  -7   6  11   28.50    5.10
  -6  -6  11  139.79    7.60
   6  -6 -11  123.59    6.90
  -6   6  11  134.39    8.20
   6   6 -11  135.39    7.70
   5  -6 -11   22.60    3.70
  -5  -6  11   17.40    3.30
   5   6 -11   21.40    4.30
  -5   6  11   17.30    4.10
   4  -6 -11  104.89    5.90
  -4  -6  11  105.29    6.00
   4   6 -11  123.59    7.20
  -4   6  11  105.69    6.60
  -3  -6  11   23.20    3.70
   3  -6 -11   25.80    3.40
   3   6 -11   22.50    3.70
  -3   6  11   17.80    3.80
  -2  -6  11    7.10    2.50
   2  -6 -11    8.20    2.30
  -2   6  11    6.80    2.70
  -2   6  11    4.90    2.90
   2   6 -11    8.30    2.80
  -1  -6  11  125.89    5.70
   1  -6 -11  118.19    5.20
  -1   6  11  107.89    6.40
   1   6 -11  128.79    6.00
  -1   6  11  125.49    6.30
   1   6 -11  125.69    6.60
   0  -6  11  119.79    5.30
   0  -6 -11  115.79    4.80
   0   6  11  127.99    6.50
   0   6 -11  112.09    6.20
   0   6  11  125.79    6.70
   0   6 -11  119.19    6.20
  -1  -6 -11    6.80    2.60
   1  -6  11    3.80    2.50
   1  -6  11    8.20    1.90
   1   6  11    4.70    2.80
  -1   6 -11    8.10    2.90
   2  -6  11   45.90    4.20
  -2  -6 -11   35.20    3.70
  -2   6 -11   49.40    5.00
   2   6  11   43.90    5.00
   3  -6  11   39.10    4.00
  -3  -6 -11   42.50    4.10
  -3   6 -11   44.50    5.20
   3   6  11   39.90    5.00
   4  -6  11   47.20    4.50
  -4  -6 -11   51.99    4.60
   4   6  11   51.49    6.10
  -4   6 -11   56.49    5.90
  -5  -6 -11    5.10    2.50
   5  -6  11   -0.70    2.50
  -5   6 -11    7.60    3.50
   5   6  11   -2.70    3.40
   6  -6  11   68.29    5.70
  -6  -6 -11   55.99    5.10
   6   6  11   47.30    6.40
  -6   6 -11   65.29    6.70
  -6  -7  11    2.70    3.10
   6  -7 -11    9.90    3.40
   6   7 -11   16.30    4.30
  -6   7  11    6.70    3.80
   5  -7 -11    3.50    2.80
  -5  -7  11   10.40    3.50
  -5   7  11    5.70    3.20
   5   7 -11   11.30    3.90
   4  -7 -11   25.20    3.80
  -4  -7  11   34.40    4.60
   4   7 -11   25.70    4.60
  -4   7  11   20.90    4.30
   3  -7 -11    3.30    2.20
  -3  -7  11    2.50    2.70
   3   7 -11    6.10    3.40
  -3   7  11    7.30    3.50
  -2  -7  11   22.20    3.60
   2  -7 -11   18.60    3.00
  -2   7  11   21.60    4.20
   2   7 -11   22.80    4.30
   1  -7 -11   58.69    4.20
  -1  -7  11   68.19    4.90
   1   7 -11   58.29    5.50
  -1   7  11   57.39    5.30
  -1   7  11   72.59    5.50
   0  -7 -11    5.60    2.80
   0  -7  11    1.40    2.10
   0   7 -11    2.20    2.60
   0   7 -11    6.00    2.80
   0   7  11   -0.70    2.70
   1  -7  11    0.50    2.20
  -1  -7 -11   -0.40    2.40
   1   7  11    2.30    3.00
  -1   7 -11    3.00    2.90
   2  -7  11    9.80    3.10
  -2  -7 -11    7.00    2.60
  -2   7 -11   16.10    4.00
   2   7  11    9.20    3.50
  -3  -7 -11   69.09    5.60
   3  -7  11   62.89    5.40
  -3   7 -11   62.89    6.20
   3   7  11   53.19    5.90
  -4  -7 -11    0.10    2.50
   4  -7  11    4.30    3.00
   4   7  11    7.70    3.90
  -4   7 -11    1.70    3.20
  -5  -7 -11   41.30    4.50
   5  -7  11   41.50    4.80
  -5   7 -11   41.80    5.60
   5   7  11   45.90    6.50
  -4  -8  11    6.50    3.30
   4  -8 -11    8.00    3.10
  -4   8  11    2.80    3.60
   4   8 -11    1.60    3.30
   3  -8 -11  123.09    6.80
  -3  -8  11  121.09    7.30
  -3   8  11  122.09    7.90
   3   8 -11  121.09    7.70
  -2  -8  11    8.40    3.10
   2  -8 -11    6.80    2.60
   2   8 -11   11.30    3.80
  -2   8  11   10.70    3.60
  -1  -8  11   39.70    4.30
   1   8 -11   48.00    5.50
  -1   8  11   41.90    5.10
   0  -8 -11   -0.50    2.60
   0   8  11   -0.30    2.80
   1  -8  11   14.10    3.50
  -1  -8 -11   14.90    3.40
   1   8  11   23.60    4.60
  -1   8 -11   18.10    4.00
   2  -8  11    8.50    3.20
  -2  -8 -11    4.60    2.90
   2   8  11    2.80    3.60
  -2   8 -11    1.00    3.10
   3  -8  11   22.60    3.90
  -3  -8 -11   27.20    4.00
  -3   8 -11   32.20    5.00
   3   8  11   14.40    4.30
   9   0 -12   -2.20    2.50
  -9   0  12    4.30    3.00
  -8   0  12   -0.20    2.40
   8   0 -12   -0.10    2.30
  -7   0  12    6.00    2.60
   7   0 -12    5.00    2.40
   6   0 -12    1.10    1.40
  -6   0  12    1.40    1.30
  -6   0  12    3.10    2.00
   6   0 -12    1.10    1.80
   5   0 -12   -0.50    1.20
   5   0 -12    0.90    1.60
  -5   0  12    1.00    1.70
  -5   0  12    1.60    1.30
   4   0 -12  305.77    7.70
  -4   0  12  299.27    7.30
  -4   0  12  303.67    7.80
   4   0 -12  298.67    7.40
  -3   0  12    2.70    1.40
  -3   0  12    2.30    1.10
   3   0 -12    3.10    1.40
   3   0 -12    2.00    1.20
   2   0 -12  302.07    6.80
  -2   0  12  303.07    7.10
   2   0 -12  296.67    7.00
  -2   0  12  306.47    7.00
   1   0 -12    1.60    1.00
  -1   0  12    1.90    1.10
  -1   0  12    2.50    1.20
   1   0 -12    0.00    1.00
   0   0 -12  510.85   10.70
   0   0  12  512.85   10.90
   0   0  12  534.65   10.20
   0   0 -12  526.95   10.20
   1   0  12    0.50    1.30
  -1   0 -12    0.20    1.20
  -1   0 -12    2.00    1.00
   1   0  12    0.00    1.00
  -2   0 -12   26.20    2.30
   2   0  12   28.30    2.60
  -2   0 -12   26.70    1.90
   2   0  12   24.90    1.90
  -3   0 -12    1.00    1.40
  -3   0 -12    3.20    1.30
   3   0  12    4.30    1.60
   3   0  12    3.70    1.30
   4   0  12   40.40    2.80
  -4   0 -12   41.50    3.20
   4   0  12   37.80    3.20
  -4   0 -12   35.70    2.80
  -5   0 -12    3.20    1.70
   5   0  12    2.10    1.60
  -5   0 -12    3.30    1.90
   5   0  12    3.70    2.00
  -6   0 -12   66.09    4.20
   6   0  12   75.59    4.40
   7   0  12    1.80    2.20
  -7   0 -12    2.50    2.20
  -8   0 -12    2.60    2.30
   8   0  12    1.30    2.40
   9  -1 -12    2.50    2.60
  -9  -1  12    2.90    2.90
  -9   1  12    5.00    3.30
   9   1 -12    1.60    2.90
  -8  -1  12   19.40    3.40
   8  -1 -12   14.70    3.00
   8   1 -12   15.40    3.30
  -8   1  12   14.30    3.60
   7  -1 -12   -1.70    1.70
   7  -1 -12   -0.10    1.50
  -7  -1  12    2.50    2.20
  -7   1  12    1.30    2.50
   7   1 -12    3.30    2.20
  -6  -1  12  257.67    7.30
   6  -1 -12  243.28    7.20
   6  -1 -12  245.98    7.30
  -6  -1  12  243.48    7.50
  -6   1  12  239.58    8.10
   6   1 -12  230.88    7.80
  -5  -1  12    3.40    1.60
   5  -1 -12    2.90    1.60
   5  -1 -12    1.30    1.50
  -5  -1  12    1.70    1.60
  -5   1  12   -3.30    1.70
   5   1 -12    3.10    1.90
  -5   1  12    2.10    1.20
   5   1 -12    1.50    1.20
   4  -1 -12   14.90    1.90
  -4  -1  12   14.10    2.00
  -4  -1  12   12.60    1.80
   4  -1 -12   10.00    1.80
   4   1 -12   15.00    1.70
   4   1 -12   10.00    2.00
  -4   1  12   11.70    1.60
  -4   1  12    9.80    2.20
   3  -1 -12    6.70    1.50
  -3  -1  12    4.60    1.50
  -3  -1  12    5.90    1.30
   3  -1 -12    4.40    1.20
  -3   1  12    5.70    1.80
   3   1 -12    3.00    1.50
  -3   1  12    3.60    1.30
   3   1 -12    4.00    1.20
   2  -1 -12  819.12   16.10
   2  -1 -12  828.22   15.10
  -2  -1  12  823.82   15.30
  -2  -1  12  813.02   16.20
  -2   1  12  838.52   16.50
   2   1 -12  827.62   16.40
  -2   1  12  824.32   16.10
   2   1 -12  820.92   15.90
  -1  -1  12   87.09    2.50
   1  -1 -12   85.59    3.30
   1  -1 -12   88.59    2.30
  -1  -1  12   86.39    3.40
   1   1 -12   89.59    3.50
  -1   1  12   80.29    3.40
  -1   1  12   87.49    3.60
   1   1 -12   79.79    3.20
   0  -1  12  782.52   15.30
   0  -1 -12  778.12   15.20
   0   1  12  787.42   15.50
   0   1 -12  759.32   15.60
   0   1  12  805.12   13.90
   0   1 -12  784.22   14.00
   0   1 -12  804.92   15.40
   0   1  12  781.22   15.80
  -1  -1 -12   57.49    2.60
   1  -1  12   55.49    2.80
  -1  -1 -12   55.49    2.70
   1  -1  12   52.19    2.70
  -1   1 -12   54.39    1.90
   1   1  12   54.59    1.90
   1   1  12   50.69    3.00
  -1   1 -12   53.19    3.00
   2  -1  12  439.86    9.50
   2  -1  12  436.46    9.50
  -2  -1 -12  422.16    9.50
  -2  -1 -12  437.56    9.50
   2   1  12  426.46    8.80
  -2   1 -12  415.56    8.70
   2   1  12  448.56   10.50
  -2   1 -12  425.56   10.10
   3  -1  12    9.00    1.70
   3  -1  12    9.50    1.70
  -3  -1 -12   12.00    1.80
  -3  -1 -12   10.00    1.80
  -3   1 -12   14.30    2.20
   3   1  12    8.20    2.10
   3   1  12   11.60    1.50
  -3   1 -12    7.60    1.40
   4  -1  12   29.20    2.70
  -4  -1 -12   32.60    2.90
  -4  -1 -12   33.40    2.80
   4  -1  12   28.90    2.70
   4   1  12   33.70    2.70
  -4   1 -12   33.20    2.70
  -4   1 -12   28.60    3.10
   4   1  12   26.10    3.10
   5  -1  12    8.20    2.10
  -5  -1 -12   11.00    2.20
  -5   1 -12   15.20    2.70
  -5   1 -12    9.90    2.00
   5   1  12   13.40    2.10
   5   1  12    8.50    2.50
  -6  -1 -12  293.97    8.70
   6  -1  12  279.47    8.50
   6   1  12  304.07    8.60
  -6   1 -12  295.57    9.40
  -6   1 -12  301.27    8.60
  -7  -1 -12    8.70    2.70
   7  -1  12   15.80    3.00
  -7   1 -12   11.30    2.70
   7   1  12   10.10    2.60
  -8  -1 -12   45.10    4.50
   8  -1  12   32.50    3.90
   8   1  12   45.40    4.70
  -8   1 -12   40.90    4.10
  -9  -2  12   73.99    5.60
   9  -2 -12   77.29    5.70
   9   2 -12   68.29    6.40
  -9   2  12   62.69    6.30
   8  -2 -12   36.10    3.80
  -8  -2  12   36.90    4.20
   8  -2 -12   34.00    3.80
   8   2 -12   33.30    4.50
  -8   2  12   30.80    4.40
  -7  -2  12   88.89    4.80
   7  -2 -12   73.99    4.60
  -7  -2  12   74.79    4.60
   7  -2 -12   77.69    4.70
   7   2 -12   77.19    5.60
  -7   2  12   85.39    5.80
   6  -2 -12   55.29    4.00
  -6  -2  12   48.00    3.70
   6  -2 -12   50.39    3.50
  -6  -2  12   55.59    3.60
   6   2 -12   57.19    4.70
  -6   2  12   63.69    5.00
   5  -2 -12   30.90    2.60
   5  -2 -12   34.70    3.20
  -5  -2  12   30.20    2.90
  -5  -2  12   30.70    2.70
  -5   2  12   28.90    3.40
   5   2 -12   35.20    3.70
   4  -2 -12   64.59    3.60
  -4  -2  12   63.19    3.70
  -4  -2  12   69.99    3.10
   4  -2 -12   61.79    2.80
   4   2 -12   67.89    2.90
   4   2 -12   64.29    4.10
  -4   2  12   65.39    3.00
  -4   2  12   71.89    4.30
   3  -2 -12  118.49    3.30
  -3  -2  12  109.59    4.50
   3  -2 -12  114.89    4.40
  -3  -2  12  114.49    3.40
   3   2 -12  114.09    3.90
   3   2 -12  114.69    4.80
  -3   2  12  112.49    4.00
  -3   2  12  119.99    5.00
  -2  -2  12  259.47    7.00
   2  -2 -12  268.67    6.90
  -2  -2  12  262.97    5.40
   2  -2 -12  263.77    5.20
   2   2 -12  267.57    6.70
  -2   2  12  264.77    6.90
   2   2 -12  267.17    7.40
  -2   2  12  259.27    7.40
  -1  -2  12   52.49    2.80
   1  -2 -12   52.29    2.80
   1   2 -12   59.79    3.40
  -1   2  12   53.29    3.10
   1   2 -12   52.99    2.90
  -1   2  12   51.09    3.40
   0  -2 -12  240.28    6.10
   0  -2  12  249.88    6.30
   0   2  12  250.97    6.90
   0   2 -12  253.87    6.80
   0   2 -12  235.48    6.60
   0   2  12  236.68    6.90
  -1  -2 -12   26.40    2.30
   1  -2  12   33.70    2.70
   1  -2  12   28.90    2.10
  -1  -2 -12   27.70    2.00
  -1   2 -12   23.30    2.50
   1   2  12   26.70    1.40
   1   2  12   26.80    2.70
  -1   2 -12   28.30    1.30
   2  -2  12   98.29    4.00
  -2  -2 -12  106.39    3.50
   2  -2  12  106.69    3.70
  -2  -2 -12  105.99    4.10
   2   2  12  117.89    5.10
   2   2  12  111.79    3.20
  -2   2 -12  107.29    3.10
  -2   2 -12  100.79    4.60
  -3  -2 -12   25.30    2.10
   3  -2  12   24.50    2.10
  -3  -2 -12   30.30    2.90
   3  -2  12   23.70    2.50
  -3   2 -12   30.80    3.30
  -3   2 -12   24.40    2.00
   3   2  12   24.40    2.00
   3   2  12   29.70    3.40
   4  -2  12    7.40    1.80
  -4  -2 -12   10.70    2.20
  -4   2 -12    7.10    1.60
   4   2  12    6.40    1.60
   4   2  12    5.80    2.50
  -4   2 -12    8.00    2.40
   5  -2  12   86.99    4.30
  -5  -2 -12   95.29    4.70
  -5   2 -12   85.09    5.40
  -5   2 -12   93.69    4.20
   5   2  12   83.99    5.40
   5   2  12   94.19    4.20
  -6  -2 -12   63.19    4.20
   6  -2  12   59.09    4.00
   6   2  12   59.29    4.10
  -6   2 -12   64.39    4.90
   6   2  12   61.69    5.20
  -6   2 -12   65.09    4.20
   7  -2  12   35.00    4.00
  -7  -2 -12   35.10    3.90
  -7   2 -12   29.60    3.50
   7   2  12   32.20    3.70
  -7   2 -12   36.40    4.50
   8  -2  12    6.10    2.60
  -8  -2 -12    8.40    2.80
  -8   2 -12    3.10    2.30
   8   2  12    2.60    2.50
  -9   3  12   17.80    4.40
   9   3 -12   16.30    4.00
  -8  -3  12   46.50    4.40
  -8  -3  12   45.50    4.70
   8  -3 -12   43.50    4.10
   8   3 -12   49.30    5.50
  -8   3  12   51.39    5.70
  -7  -3  12    3.90    2.50
   7  -3 -12    3.80    2.20
  -7  -3  12    5.20    2.20
   7   3 -12    4.00    2.90
  -7   3  12    8.10    3.40
   6  -3 -12   33.80    3.60
  -6  -3  12   29.30    2.90
  -6  -3  12   26.20    3.30
   6   3 -12   32.70    3.90
  -6   3  12   26.30    3.90
   5  -3 -12  245.38    7.70
  -5  -3  12  242.68    6.60
  -5  -3  12  237.28    7.80
   5   3 -12  251.57    8.50
  -5   3  12  241.78    8.60
  -4  -3  12  165.58    6.10
  -4  -3  12  151.98    4.50
   4  -3 -12  146.89    5.70
   4   3 -12  158.28    6.40
  -4   3  12  144.39    6.40
   4   3 -12  159.08    4.80
  -4   3  12  154.18    5.00
   3  -3 -12   49.20    3.30
  -3  -3  12   42.90    2.20
  -3  -3  12   50.39    3.70
   3   3 -12   37.80    3.50
  -3   3  12   46.30    4.00
  -3   3  12   47.00    3.00
   3   3 -12   51.49    2.80
  -2  -3  12   18.00    2.40
   2  -3 -12   17.40    2.20
  -2   3  12   17.70    2.20
   2   3 -12   17.00    2.10
   2   3 -12   12.70    2.30
  -2   3  12   19.90    2.90
   1  -3 -12   53.49    3.00
  -1  -3  12   48.70    3.20
   1   3 -12   50.39    3.20
  -1   3  12   43.20    3.30
   1   3 -12   47.50    3.60
  -1   3  12   56.69    3.90
   0  -3  12  127.39    4.40
   0  -3 -12  134.79    4.30
   0   3 -12  133.79    5.30
   0   3 -12  129.29    5.00
   0   3  12  120.49    5.10
   0   3  12  130.49    5.30
  -1  -3 -12  588.74   12.00
  -1  -3 -12  601.24   13.20
   1  -3  12  577.04   12.20
   1  -3  12  590.44   13.10
   1   3  12  590.34   13.90
  -1   3 -12  590.14   13.60
   2  -3  12  128.19    5.00
   2  -3  12  133.29    4.10
  -2  -3 -12  129.59    5.10
  -2  -3 -12  129.99    3.90
   2   3  12  142.29    6.10
   2   3  12  128.89    3.80
  -2   3 -12  116.19    5.40
   3  -3  12  217.68    6.70
   3  -3  12  212.28    5.60
  -3  -3 -12  212.98    6.80
   3   3  12  215.78    5.80
   3   3  12  209.78    8.00
  -3   3 -12  212.78    7.70
   4  -3  12  151.68    5.80
  -4  -3 -12  142.59    5.90
   4   3  12  142.99    5.10
  -4   3 -12  139.79    5.00
   4   3  12  158.48    7.20
  -4   3 -12  155.18    6.80
  -5  -3 -12   68.69    4.20
   5  -3  12   65.99    4.30
   5   3  12   66.79    3.90
   5   3  12   56.19    5.20
  -5   3 -12   63.89    5.30
  -5   3 -12   72.29    4.50
   6  -3  12   82.99    5.00
  -6  -3 -12   80.19    5.00
   6   3  12   85.49    4.80
   6   3  12   82.69    6.10
  -6   3 -12   87.69    6.10
   7  -3  12    2.80    2.40
  -7  -3 -12   -1.80    2.00
   7   3  12   -2.40    3.00
  -7   3 -12    3.00    3.10
   7   3  12    1.80    2.30
  -8  -3 -12   79.79    5.70
   8  -3  12   75.49    5.50
   8   3  12   83.19    5.70
  -8  -4  12   16.20    3.40
   8  -4 -12   10.20    2.80
   8   4 -12    6.60    3.80
  -8   4  12    9.20    3.50
   7  -4 -12   14.30    3.20
  -7  -4  12   11.30    3.10
  -7   4  12    6.20    3.50
   7   4 -12   17.60    3.70
  -6  -4  12   14.20    3.10
   6  -4 -12   22.50    3.40
   6   4 -12   12.60    3.50
  -6   4  12   20.60    3.90
   5  -4 -12   15.10    2.90
  -5  -4  12    6.30    2.40
  -5   4  12    9.20    3.00
   5   4 -12    9.00    2.60
   4  -4 -12    4.30    1.90
  -4  -4  12    5.20    2.40
   4   4 -12    0.80    2.50
  -4   4  12    4.60    2.60
  -3  -4  12  389.86   10.40
   3  -4 -12  375.16   10.10
  -3   4  12  397.86   11.00
   3   4 -12  397.16    9.40
   3   4 -12  367.06   10.80
  -3   4  12  384.56    9.80
   2  -4 -12    1.90    1.70
  -2  -4  12    0.50    1.60
  -2   4  12   -1.50    1.50
   2   4 -12    1.20    1.60
   2   4 -12   -1.20    2.00
  -2   4  12    5.30    2.40
  -1  -4  12   52.09    3.50
   1  -4 -12   54.79    3.30
   1   4 -12   56.39    3.80
  -1   4  12   61.09    4.50
   1   4 -12   50.49    4.00
  -1   4  12   48.60    3.80
   0  -4 -12   21.10    2.10
   0  -4  12   20.50    2.30
   0   4  12   13.70    2.60
   0   4  12   19.30    2.80
   0   4 -12   22.00    3.10
   0   4 -12   15.70    2.60
   1  -4  12   99.39    4.90
  -1  -4 -12   95.19    4.60
  -1  -4 -12  100.89    3.70
   1  -4  12  101.09    4.00
  -1   4 -12   97.79    5.10
   1   4  12  110.29    5.60
   2  -4  12  109.29    5.10
  -2  -4 -12  106.29    5.00
   2  -4  12  111.29    3.90
  -2  -4 -12  102.19    3.60
  -2   4 -12  112.89    5.70
   2   4  12   96.49    5.80
   3  -4  12  414.96   10.80
  -3  -4 -12  411.96   10.70
  -3   4 -12  402.06   11.80
   3   4  12  408.86   12.10
   4  -4  12   74.39    4.60
  -4  -4 -12   70.09    4.50
  -4   4 -12   60.29    5.30
   4   4  12   65.09    5.70
   5  -4  12   38.40    3.90
  -5  -4 -12   30.50    3.40
  -5   4 -12   46.40    5.10
   5   4  12   39.20    4.80
   6  -4  12   -1.60    1.90
  -6  -4 -12    0.60    2.20
   6   4  12   -2.20    2.90
  -6   4 -12   -1.30    2.90
   7  -4  12    0.40    2.30
  -7  -4 -12   -0.50    2.30
  -7   4 -12   -4.20    2.80
   7   4  12   -0.30    3.00
  -8  -5  12    2.20    2.90
   8  -5 -12    9.40    3.20
   8   5 -12    4.30    3.80
  -8   5  12    6.50    3.60
   7  -5 -12    8.10    3.00
  -7  -5  12   14.40    3.50
   7   5 -12   16.20    4.20
  -7   5  12   13.80    3.80
  -6  -5  12    1.40    2.70
   6  -5 -12    0.00    2.30
   6   5 -12    3.20    2.80
  -6   5  12   -0.50    2.90
  -5  -5  12   54.59    5.00
   5  -5 -12   41.50    4.20
   5   5 -12   44.40    5.10
  -5   5  12   35.10    4.70
  -4  -5  12    0.40    2.00
   4  -5 -12   -2.00    1.80
   4   5 -12    0.90    2.70
  -4   5  12   -1.40    2.50
   3  -5 -12  114.59    5.40
  -3  -5  12  110.69    5.50
  -3   5  12  117.49    6.40
   3   5 -12  115.89    6.30
  -2  -5  12    2.10    2.10
   2  -5 -12    0.10    1.70
  -2   5  12    0.70    2.20
   2   5 -12    3.50    1.90
   2   5 -12   -0.80    2.20
  -2   5  12   -0.70    1.80
  -1  -5  12  354.26    9.70
   1  -5 -12  360.46    9.30
   1   5 -12  361.86   10.10
  -1   5  12  362.26   10.90
  -1   5  12  357.86   10.50
   1   5 -12  346.07   10.50
   0  -5 -12    0.00    1.30
   0  -5  12    0.30    1.50
   0   5 -12   -0.10    2.00
   0   5 -12    1.20    2.30
   0   5  12    1.20    2.40
   0   5  12    1.50    2.20
   1  -5  12   20.80    3.00
  -1  -5 -12   22.90    3.00
   1  -5  12   19.30    2.30
  -1  -5 -12   21.70    2.20
  -1   5 -12   24.20    3.50
   1   5  12   26.70    3.90
   2  -5  12   14.70    2.90
  -2  -5 -12   13.00    2.60
   2   5  12   18.20    3.70
  -2   5 -12   15.10    3.30
  -3  -5 -12   22.30    3.10
   3  -5  12   19.60    3.10
   3   5  12   28.50    4.40
  -3   5 -12   22.80    3.60
  -4  -5 -12    6.70    2.40
   4  -5  12    5.40    2.60
  -4   5 -12    6.50    3.20
   4   5  12    6.10    3.30
  -5  -5 -12   77.29    5.20
   5  -5  12   67.49    5.10
   5   5  12   85.59    7.40
  -5   5 -12   80.89    6.90
   6  -5  12    3.60    2.50
  -6  -5 -12   -1.00    2.20
   6   5  12    1.80    3.70
  -6   5 -12    1.60    3.30
   7  -5  12   43.40    4.70
  -7  -5 -12   49.70    5.10
  -7   5 -12   53.09    6.30
   7   5  12   43.30    6.10
  -7  -6  12   80.99    6.50
   7  -6 -12   73.09    6.10
   7   6 -12   84.69    7.60
  -7   6  12   82.39    7.60
  -6  -6  12   25.80    4.20
   6  -6 -12   23.60    3.90
   6   6 -12   20.80    4.50
  -6   6  12   17.30    4.20
   5  -6 -12   86.39    5.80
  -5  -6  12   95.89    6.30
  -5   6  12   82.09    7.00
   5   6 -12   93.29    7.40
  -4  -6  12   45.60    4.80
   4  -6 -12   40.70    4.20
  -4   6  12   42.30    4.80
   4   6 -12   54.09    5.50
  -3  -6  12   26.30    3.70
   3  -6 -12   21.60    3.20
  -3   6  12   26.40    4.30
   3   6 -12   19.40    3.60
   2  -6 -12    7.00    2.20
  -2  -6  12    4.90    2.20
  -2   6  12    8.50    3.30
  -2   6  12    6.00    2.40
   2   6 -12    1.90    2.60
  -1  -6  12  301.07    9.10
   1  -6 -12  296.17    8.50
  -1   6  12  283.67   10.10
   1   6 -12  294.47   10.10
  -1   6  12  295.47    9.90
   1   6 -12  304.27    9.50
   0  -6  12   11.10    2.30
   0  -6 -12    8.90    1.90
   0   6 -12    7.70    2.90
   0   6 -12   11.60    2.90
   0   6  12    6.40    2.90
   0   6  12    8.90    2.80
  -1  -6 -12   28.80    3.70
   1  -6  12   36.30    4.10
   1  -6  12   23.10    2.70
   1   6  12   28.20    4.30
  -1   6 -12   29.30    4.00
   2  -6  12   31.10    3.80
  -2  -6 -12   32.70    3.90
   2   6  12   36.70    4.80
  -2   6 -12   22.90    3.90
  -3  -6 -12   44.70    4.20
   3  -6  12   52.19    4.70
   3   6  12   56.79    5.90
  -3   6 -12   44.90    5.20
   4  -6  12   12.10    3.10
  -4  -6 -12   15.70    3.20
  -4   6 -12   21.30    4.30
   4   6  12   12.30    4.10
  -5  -6 -12   25.10    3.90
   5  -6  12   24.70    3.90
   5   6  12   41.20    6.00
  -5   6 -12   32.70    5.20
   6  -6  12    2.30    2.90
  -6  -6 -12    4.60    2.80
   6   6  12    2.30    3.60
  -6   6 -12    7.90    4.00
   5  -7 -12    6.20    2.80
  -5  -7  12    7.40    3.50
  -5   7  12    3.60    3.40
   5   7 -12   13.10    3.90
   4  -7 -12   14.00    3.10
  -4  -7  12   20.70    3.80
   4   7 -12   16.60    4.10
  -4   7  12   19.30    4.40
   3  -7 -12    5.60    2.60
  -3  -7  12   12.50    3.40
   3   7 -12   10.70    3.60
  -3   7  12    8.40    3.30
   2  -7 -12   40.10    3.90
  -2  -7  12   32.70    3.90
   2   7 -12   32.90    4.40
  -2   7  12   35.80    4.90
  -1  -7  12   69.69    4.90
   1  -7 -12   77.89    4.60
  -1   7  12   76.69    6.00
   1   7 -12   70.79    6.00
  -1   7  12   60.09    5.50
   0  -7 -12    1.80    2.50
   0  -7  12    4.40    2.20
   0   7 -12    5.20    2.70
   0   7  12    5.50    3.10
   0   7 -12    9.40    3.20
   1  -7  12    1.90    2.60
  -1  -7 -12    2.70    2.60
  -1   7 -12    5.60    3.00
   1   7  12   -3.40    2.40
   2  -7  12   20.50    3.60
  -2  -7 -12   24.10    3.80
  -2   7 -12   25.70    4.40
   2   7  12   20.10    4.40
   3  -7  12   12.70    3.40
  -3  -7 -12   13.30    3.40
   3   7  12   11.30    4.00
  -3   7 -12   15.50    4.10
  -4  -7 -12   24.20    4.00
   4  -7  12   21.30    3.80
   4   7  12   14.60    4.50
  -4   7 -12   15.50    4.10
  -5  -7 -12   52.39    5.30
  -4  -8  12   24.40    4.40
   4  -8 -12   11.40    3.30
   4   8 -12   16.90    4.40
  -4   8  12   12.40    4.30
  -3  -8  12    4.30    3.20
   3  -8 -12    9.20    2.90
  -3   8  12    5.40    3.60
   3   8 -12   11.20    3.90
   2  -8 -12   11.20    2.90
  -2  -8  12    7.80    3.10
   2   8 -12    9.50    3.60
  -2   8  12    3.60    3.40
  -1  -8  12    8.50    2.90
  -1   8  12   10.10    3.50
   1   8 -12   10.30    3.60
   0  -8 -12    3.10    2.80
   0   8  12    2.90    3.20
   1  -8  12    0.60    2.80
  -1  -8 -12   -2.50    2.60
  -1   8 -12   -1.20    2.80
   1   8  12    0.20    3.00
  -2  -8 -12    6.90    3.20
   2  -8  12    8.40    3.20
   2   8  12   11.60    4.10
  -2   8 -12    2.10    3.00
   3  -8  12   -0.70    2.90
  -3  -8 -12   -1.60    2.60
  -3   8 -12    2.60    3.50
   3   8  12    2.70    3.70
  -9   0  13   21.70    4.30
   9   0 -13   26.90    4.10
  -8   0  13    2.70    2.80
   8   0 -13    0.60    2.30
  -7   0  13    9.40    2.80
   7   0 -13   11.20    2.70
  -6   0  13    0.40    1.30
   6   0 -13    0.20    1.40
   6   0 -13    0.40    1.80
  -6   0  13    2.20    2.10
  -5   0  13  133.99    5.30
   5   0 -13  135.79    5.20
  -5   0  13  132.19    4.50
   5   0 -13  126.89    4.60
  -4   0  13    2.00    1.30
   4   0 -13   -0.60    1.40
  -4   0  13    2.10    1.60
   4   0 -13    2.10    1.30
  -3   0  13  408.36    9.10
  -3   0  13  403.76    9.20
   3   0 -13  399.06    9.00
   3   0 -13  399.16    9.00
   2   0 -13    0.00    1.00
  -2   0  13    2.50    1.30
   2   0 -13    1.00    1.10
  -2   0  13    2.30    1.20
  -1   0  13  356.86    8.40
   1   0 -13  378.56    8.40
   1   0 -13  388.46    8.00
  -1   0  13  373.46    8.10
   0   0  13    3.30    1.00
   0   0 -13    3.70    1.30
   0   0 -13    4.60    1.10
   0   0  13    1.00    1.30
   1   0  13   89.29    3.00
  -1   0 -13   88.49    3.00
  -1   0 -13   93.29    3.70
   1   0  13   91.89    3.80
  -2   0 -13   12.40    1.50
   2   0  13   11.20    1.40
  -2   0 -13    8.60    1.70
   2   0  13   10.30    1.90
   3   0  13   13.10    1.70
  -3   0 -13   12.30    1.80
   3   0  13   12.10    2.10
  -3   0 -13   12.50    2.10
   4   0  13    6.30    2.10
  -4   0 -13    4.90    1.60
  -4   0 -13    2.80    1.80
   4   0  13    5.10    1.70
   5   0  13   73.79    3.90
  -5   0 -13   71.39    4.40
  -5   0 -13   70.29    3.90
   5   0  13   74.19    4.40
  -6   0 -13   -0.20    1.80
   6   0  13    3.80    2.00
  -7   0 -13   56.89    4.30
   7   0  13   58.39    4.60
  -8   0 -13    2.20    2.30
   8   0  13    1.40    2.50
   9  -1 -13   73.19    5.90
  -9  -1  13   72.09    6.10
   9   1 -13   75.79    6.40
  -9   1  13   71.99    6.40
   8  -1 -13    4.10    2.40
  -8  -1  13    4.80    2.60
   8   1 -13    6.20    3.00
  -8   1  13    7.10    3.10
   7  -1 -13  102.69    4.80
  -7  -1  13  102.49    5.30
   7  -1 -13   95.89    5.20
   7   1 -13   95.29    5.50
  -7   1  13  105.89    6.00
   6  -1 -13   15.20    2.40
   6  -1 -13   10.40    2.20
  -6  -1  13   17.60    2.60
  -6  -1  13   13.00    2.20
  -6   1  13   14.30    2.90
   6   1 -13   15.00    2.80
   5  -1 -13   70.39    3.60
   5  -1 -13   72.29    3.90
  -5  -1  13   77.09    4.00
  -5  -1  13   72.39    3.90
   5   1 -13   72.79    3.30
   5   1 -13   83.09    4.50
  -5   1  13   77.99    4.50
  -5   1  13   73.59    3.30
  -4  -1  13   35.00    2.80
   4  -1 -13   29.30    2.50
   4  -1 -13   31.40    2.50
  -4  -1  13   29.80    2.50
  -4   1  13   29.80    2.40
   4   1 -13   30.80    2.30
   4   1 -13   38.50    3.20
  -4   1  13   34.40    3.30
   3  -1 -13   45.20    2.80
  -3  -1  13   35.60    2.40
   3  -1 -13   40.20    2.30
  -3  -1  13   42.50    2.90
  -3   1  13   44.00    3.20
   3   1 -13   44.80    3.10
   3   1 -13   37.50    2.40
  -3   1  13   42.70    2.60
  -2  -1  13   16.80    1.50
  -2  -1  13   16.10    1.90
   2  -1 -13   16.20    1.40
   2  -1 -13   15.00    1.80
  -2   1  13   13.30    1.70
  -2   1  13   11.90    2.00
   2   1 -13   17.90    2.00
   2   1 -13   17.90    1.80
  -1  -1  13  246.68    6.40
   1  -1 -13  251.17    6.30
  -1  -1  13  251.37    5.30
   1  -1 -13  252.87    5.10
   1   1 -13  251.27    6.40
   1   1 -13  243.98    6.40
  -1   1  13  264.97    6.70
  -1   1  13  252.27    6.60
   0  -1 -13   44.10    2.50
   0  -1  13   38.10    2.50
   0   1  13   40.30    2.90
   0   1  13   40.80    1.50
   0   1 -13   41.60    2.80
   0   1 -13   43.30    1.50
   0   1 -13   41.60    2.70
   0   1  13   43.90    2.80
  -1  -1 -13  279.07    6.70
   1  -1  13  271.07    6.60
  -1  -1 -13  275.87    6.70
   1  -1  13  287.67    6.90
  -1   1 -13  267.97    5.60
   1   1  13  262.57    5.60
   1   1  13  267.37    7.40
  -1   1 -13  267.87    7.10
   2  -1  13   56.89    3.10
  -2  -1 -13   51.59    2.90
   2  -1  13   54.19    2.90
  -2  -1 -13   47.10    2.80
  -2   1 -13   51.09    3.30
   2   1  13   50.99    3.60
   2   1  13   53.49    2.30
  -2   1 -13   50.79    2.20
  -3  -1 -13   19.00    2.10
   3  -1  13   18.60    2.20
  -3  -1 -13   25.60    2.50
   3  -1  13   23.00    2.30
   3   1  13   18.90    1.80
  -3   1 -13   19.50    1.90
   3   1  13   21.40    2.80
  -3   1 -13   25.70    2.90
   4  -1  13   -1.20    1.40
  -4  -1 -13   -0.70    1.40
  -4  -1 -13   -0.20    1.50
   4  -1  13    2.20    1.50
   4   1  13   -0.80    1.80
   4   1  13   -0.30    1.30
  -4   1 -13    1.20    1.80
  -4   1 -13    1.90    1.40
  -5  -1 -13  122.39    5.00
   5  -1  13  115.69    5.00
  -5   1 -13  123.89    4.80
   5   1  13  124.09    4.90
   5   1  13  118.19    6.00
  -5   1 -13  125.59    5.80
  -6  -1 -13   78.99    4.60
   6  -1  13   82.69    4.70
  -6   1 -13   87.39    4.60
   6   1  13   89.99    4.70
  -6   1 -13   93.09    5.40
  -7  -1 -13   19.70    3.20
   7  -1  13   14.80    2.90
  -7   1 -13   15.10    3.00
   7   1  13   13.80    2.80
   8  -1  13   13.10    3.20
  -8  -1 -13   11.40    3.00
  -8   1 -13   14.40    2.90
   8   1  13   15.20    3.20
  -9  -2  13   29.90    4.20
  -9   2  13   27.80    4.70
   9   2 -13   32.60    4.80
   8  -2 -13   67.19    4.70
   8  -2 -13   70.09    4.80
  -8  -2  13   65.69    4.90
   8   2 -13   68.59    6.00
  -8   2  13   53.89    5.50
   7  -2 -13   70.69    4.40
   7  -2 -13   63.79    4.30
  -7  -2  13   66.49    4.50
  -7  -2  13   69.19    4.50
  -7   2  13   71.49    5.90
   7   2 -13   62.59    5.30
  -6  -2  13   15.40    2.50
   6  -2 -13   17.20    2.50
   6  -2 -13   16.10    2.70
  -6  -2  13   18.30    2.70
   6   2 -13   17.20    3.20
  -6   2  13   18.50    3.30
  -5  -2  13   10.00    2.20
   5  -2 -13   10.60    1.80
   5  -2 -13    8.50    2.10
  -5  -2  13    8.30    1.80
   5   2 -13    7.70    2.30
  -5   2  13    7.30    2.60
   5   2 -13    4.80    1.50
   4  -2 -13   99.99    4.40
  -4  -2  13  116.59    4.80
  -4  -2  13  109.29    3.80
   4  -2 -13  106.39    3.60
  -4   2  13  112.39    5.30
   4   2 -13  110.29    5.10
   4   2 -13  109.69    3.90
  -4   2  13  111.79    4.00
   3  -2 -13  121.69    3.40
  -3  -2  13  121.99    4.70
  -3  -2  13  113.29    3.50
   3  -2 -13  119.79    4.50
   3   2 -13  119.99    4.00
  -3   2  13  119.79    4.20
  -3   2  13  110.49    5.00
   3   2 -13  117.59    5.00
  -2  -2  13  342.77    6.80
   2  -2 -13  354.06    8.40
   2  -2 -13  350.66    6.60
  -2  -2  13  342.27    8.50
   2   2 -13  339.57    8.90
   2   2 -13  353.56    8.30
  -2   2  13  356.56    9.10
  -2   2  13  355.06    8.50
  -1  -2  13  552.54   11.90
   1  -2 -13  566.24   11.80
   1   2 -13  571.74   12.40
  -1   2  13  544.65   12.20
   1   2 -13  535.75   12.00
  -1   2  13  571.64   12.60
   0  -2  13  305.27    7.40
   0  -2 -13  315.37    7.30
   0   2 -13  306.57    7.90
   0   2  13  296.67    8.20
   0   2  13  307.47    8.10
  -1  -2 -13  114.79    4.40
  -1  -2 -13  119.69    3.90
   1  -2  13  118.49    4.40
   1  -2  13  114.79    3.90
  -1   2 -13  124.39    4.90
  -1   2 -13  116.59    2.80
   1   2  13  122.09    5.10
   1   2  13  118.39    2.90
  -2  -2 -13  206.48    5.40
   2  -2  13  200.38    5.50
  -2  -2 -13  196.78    5.90
   2  -2  13  210.38    6.10
  -2   2 -13  190.68    4.70
   2   2  13  197.38    4.80
   2   2  13  192.28    6.70
  -2   2 -13  188.68    6.50
   3  -2  13   80.39    4.00
  -3  -2 -13   82.79    3.40
   3  -2  13   84.89    3.50
  -3  -2 -13   81.29    3.90
   3   2  13   84.09    4.90
   3   2  13   84.49    3.30
  -3   2 -13   79.39    3.10
  -3   2 -13   84.79    4.60
   4  -2  13   10.40    2.10
  -4  -2 -13    8.50    2.00
  -4   2 -13   11.10    1.70
   4   2  13   10.60    2.80
  -4   2 -13   13.00    2.80
   4   2  13    8.90    1.80
   5  -2  13  186.28    6.50
  -5  -2 -13  168.28    6.40
   5   2  13  177.98    7.70
   5   2  13  181.28    6.00
  -5   2 -13  187.48    6.00
  -5   2 -13  175.18    7.40
  -6  -2 -13   62.69    4.50
   6  -2  13   57.79    4.40
   6   2  13   68.19    4.20
  -6   2 -13   58.79    5.30
  -6   2 -13   56.89    4.00
   6   2  13   54.09    5.00
  -7  -2 -13   25.20    3.50
   7  -2  13   20.90    3.00
   7   2  13   28.50    3.60
  -7   2 -13   24.50    5.50
  -7   2 -13   21.20    3.10
   8  -2  13    3.80    2.60
  -8  -2 -13    4.00    2.60
   8   2  13    0.50    2.30
  -8   2 -13    4.70    2.40
  -9   3  13   15.80    3.90
   9   3 -13   15.00    4.10
   8  -3 -13   40.00    4.00
  -8  -3  13   35.90    3.90
   8   3 -13   29.00    4.70
  -8   3  13   40.60    5.30
  -7  -3  13   30.50    3.60
   7  -3 -13   28.50    3.60
   7   3 -13   34.00    4.40
  -7   3  13   31.90    4.60
  -6  -3  13   71.19    4.70
   6  -3 -13   63.89    4.40
   6   3 -13   64.59    5.40
  -6   3  13   76.29    5.60
   5  -3 -13  204.08    7.00
  -5  -3  13  211.88    7.30
  -5   3  13  201.78    7.90
   5   3 -13  217.08    8.00
   4  -3 -13  394.66   10.30
  -4  -3  13  409.36   10.50
  -4   3  13  381.76   10.90
  -4   3  13  404.76    9.60
   4   3 -13  395.36   10.90
   4   3 -13  415.36    9.30
   3  -3 -13   59.49    3.50
  -3  -3  13   58.29    3.80
  -3   3  13   66.99    4.50
   3   3 -13   63.39    3.30
   3   3 -13   54.29    3.90
  -3   3  13   63.09    3.50
  -2  -3  13   29.70    2.90
   2  -3 -13   35.60    3.00
  -2   3  13   26.90    3.00
   2   3 -13   33.40    2.70
  -2   3  13   29.10    2.80
   2   3 -13   38.80    3.50
  -1  -3  13    3.00    1.60
   1  -3 -13    0.60    1.30
  -1   3  13    4.20    1.80
   1   3 -13    1.50    1.50
  -1   3  13    3.70    2.10
   1   3 -13    0.60    1.90
   0  -3  13  312.77    7.80
   0  -3 -13  314.57    7.50
   0   3  13  318.47    8.70
   0   3  13  287.77    8.50
   0   3 -13  311.87    8.50
   0   3 -13  296.87    8.50
  -1  -3 -13   55.89    2.70
   1  -3  13   61.49    3.10
  -1  -3 -13   60.09    3.40
   1  -3  13   64.39    3.90
   1   3  13   60.99    4.00
  -1   3 -13   59.89    3.90
   2  -3  13   41.80    3.30
   2  -3  13   30.60    2.40
  -2  -3 -13   37.40    2.30
  -2  -3 -13   33.10    2.90
   2   3  13   33.70    3.80
  -2   3 -13   32.90    3.50
   3  -3  13   76.39    3.30
  -3  -3 -13   74.39    4.20
   3  -3  13   72.29    4.00
   3   3  13   77.99    5.30
  -3   3 -13   64.69    4.70
  -4  -3 -13  204.68    7.00
   4  -3  13  207.28    6.90
   4   3  13  199.68    6.40
  -4   3 -13  183.98    7.70
   4   3  13  207.88    8.30
   5  -3  13   74.59    4.60
  -5  -3 -13   66.49    4.50
  -5   3 -13   71.19    5.60
   5   3  13   69.89    3.90
   5   3  13   79.59    6.10
  -6  -3 -13   59.99    4.80
   6  -3  13   45.80    4.00
  -6   3 -13   64.59    5.70
   6   3  13   59.49    5.80
   6   3  13   53.39    4.00
   7  -3  13   18.20    3.20
  -7  -3 -13   30.90    4.00
   7   3  13   30.40    4.60
  -7   3 -13   15.20    3.80
   7   3  13   20.30    4.20
  -8  -3 -13   45.50    4.80
   8  -3  13   40.80    4.60
   8  -4 -13    6.00    2.60
  -8  -4  13   12.00    3.10
   8   4 -13    6.60    3.70
  -8   4  13   11.00    3.90
  -7  -4  13   13.90    3.30
   7  -4 -13   18.70    3.30
   7   4 -13   18.20    4.00
  -7   4  13   22.20    4.10
   6  -4 -13   98.19    5.60
  -6  -4  13   95.99    5.70
   6   4 -13   97.19    6.50
  -6   4  13   88.99    6.50
  -5  -4  13   60.59    4.70
   5  -4 -13   56.09    4.50
  -5   4  13   55.29    5.20
   5   4 -13   52.19    4.80
   4  -4 -13  385.06   10.70
  -4  -4  13  430.46   11.20
  -4   4  13  384.26   11.70
   4   4 -13  403.96   11.70
  -3  -4  13   16.80    2.80
   3  -4 -13   15.50    2.40
  -3   4  13    9.70    2.20
   3   4 -13   14.80    2.80
   3   4 -13   15.20    2.20
  -3   4  13   19.70    3.10
   2  -4 -13   16.80    2.50
  -2  -4  13   18.90    2.60
   2   4 -13   20.00    2.50
  -2   4  13   17.50    3.00
   2   4 -13   12.60    2.60
  -2   4  13   21.00    2.80
  -1  -4  13   13.20    2.40
   1  -4 -13   13.30    2.00
   1   4 -13   11.90    2.60
  -1   4  13   12.60    2.80
  -1   4  13   11.20    2.50
   1   4 -13   15.50    2.50
   0  -4 -13  166.98    5.30
   0  -4  13  166.68    5.60
   0   4 -13  163.68    6.50
   0   4 -13  170.78    6.30
   0   4  13  170.28    6.80
   0   4  13  183.48    6.80
   1  -4  13   41.10    2.90
   1  -4  13   34.90    3.20
  -1  -4 -13   48.50    2.70
  -1  -4 -13   42.70    3.60
  -1   4 -13   36.50    3.60
   1   4  13   42.10    4.10
  -2  -4 -13  690.33   14.10
  -2  -4 -13  696.23   15.80
   2  -4  13  718.53   15.90
   2  -4  13  700.83   14.30
  -2   4 -13  700.63   16.70
   2   4  13  712.83   17.30
   3  -4  13  147.19    6.00
  -3  -4 -13  148.89    5.90
   3   4  13  134.89    6.80
  -3   4 -13  143.89    6.90
  -4  -4 -13    8.70    2.50
   4  -4  13   11.90    2.60
   4   4  13   11.40    3.30
  -4   4 -13   14.10    3.50
   5  -4  13   31.70    3.50
  -5  -4 -13   27.90    3.60
   5   4  13   24.90    4.40
  -5   4 -13   18.50    3.80
   6  -4  13   24.50    3.60
  -6  -4 -13   25.90    3.70
   6   4  13   27.70    4.80
  -6   4 -13   25.90    4.50
  -7  -4 -13   15.40    3.20
   7  -4  13   22.10    3.60
   7   4  13   15.80    4.20
  -7   4 -13   26.10    4.80
   8  -5 -13   63.39    5.70
  -8  -5  13   58.89    5.70
  -8   5  13   66.29   10.40
   8   5 -13   67.09    9.70
   7  -5 -13    1.70    2.40
  -7  -5  13   -4.10    2.60
  -7   5  13    6.50    3.70
   7   5 -13    0.20    2.90
   6  -5 -13   10.10    3.00
  -6  -5  13   15.50    3.40
  -6   5  13    7.30    3.40
   6   5 -13   11.00    3.90
  -5  -5  13    4.40    2.40
   5  -5 -13    2.80    2.20
   5   5 -13   -1.50    2.80
  -5   5  13    0.90    2.80
  -4  -5  13  100.89    5.70
   4  -5 -13   88.39    5.20
   4   5 -13   95.59    5.90
  -4   5  13   93.49    6.30
  -3  -5  13   -0.70    2.20
   3  -5 -13    1.30    1.90
  -3   5  13   -2.10    2.20
   3   5 -13    3.50    2.60
  -2  -5  13  324.37    9.60
   2  -5 -13  337.07    9.30
   2   5 -13  317.37   10.30
  -2   5  13  347.57   10.70
  -2   5  13  331.27    9.80
   2   5 -13  345.57    9.50
  -1  -5  13    2.30    1.90
   1  -5 -13   -0.30    1.50
  -1   5  13    4.00    2.30
  -1   5  13    0.80    2.50
   1   5 -13    1.80    2.00
   1   5 -13    4.40    2.50
   0  -5 -13   15.10    2.10
   0  -5  13   11.00    2.10
   0   5 -13    9.60    2.70
   0   5  13   13.10    2.80
   0   5 -13   16.60    3.00
   0   5  13   13.40    2.90
   1  -5  13   21.10    2.40
   1  -5  13   12.90    2.60
  -1  -5 -13   17.80    2.10
  -1  -5 -13   19.70    3.00
   1   5  13   14.70    3.40
  -1   5 -13   16.90    3.10
  -2  -5 -13  254.17    8.50
   2  -5  13  272.57    8.60
  -2   5 -13  268.47    9.40
   2   5  13  240.98    9.60
  -3  -5 -13    8.70    2.40
   3  -5  13    6.40    2.50
  -3   5 -13    3.60    2.90
   3   5  13   11.20    3.60
   4  -5  13   21.60    3.40
  -4  -5 -13   26.90    3.60
  -4   5 -13   23.80    4.20
   4   5  13   21.70    4.00
  -5  -5 -13    1.70    2.40
   5  -5  13    2.00    2.50
  -5   5 -13   -2.60    2.90
   5   5  13    2.60    3.30
   6  -5  13   40.80    4.50
  -6  -5 -13   37.80    4.40
  -6   5 -13   42.40    5.70
   6   5  13   37.00    5.80
  -7  -6  13   18.90    3.90
   7  -6 -13   16.50    3.80
   7   6 -13   14.30    4.40
  -7   6  13    9.70    4.10
  -6  -6  13   17.80    3.70
   6  -6 -13   13.20    3.40
   6   6 -13   23.20    4.50
  -6   6  13   14.90    4.20
  -5  -6  13   51.49    5.20
   5  -6 -13   40.90    4.50
   5   6 -13   44.80    5.30
  -5   6  13   36.00    5.10
   4  -6 -13   84.79    5.50
  -4  -6  13   79.69    5.40
   4   6 -13   83.69    6.10
  -4   6  13   86.79    6.60
   3  -6 -13    6.90    2.50
  -3  -6  13    5.30    2.60
   3   6 -13    8.10    3.10
  -3   6  13    2.90    3.10
  -2  -6  13   53.29    4.50
   2  -6 -13   59.79    4.20
  -2   6  13   61.69    5.60
  -2   6  13   61.59    4.80
   2   6 -13   67.59    5.20
   1  -6 -13   35.60    3.30
  -1  -6  13   26.90    3.20
  -1   6  13   32.80    4.10
   1   6 -13   36.00    3.90
   1   6 -13   27.60    4.30
  -1   6  13   36.90    4.50
   0  -6  13    2.80    1.90
   0  -6 -13    0.20    1.40
   0   6 -13   -0.80    2.20
   0   6 -13   -1.10    2.30
   0   6  13   -1.10    2.40
   1  -6  13    2.50    2.20
  -1  -6 -13    2.20    2.20
   1  -6  13    4.00    2.70
  -1   6 -13    4.70    2.80
   1   6  13    6.20    3.10
   2  -6  13   22.40    3.60
  -2  -6 -13   14.30    3.00
   2   6  13   18.90    3.90
  -2   6 -13   19.20    3.80
   3  -6  13   -0.10    2.40
  -3  -6 -13    3.30    2.20
   3   6  13    2.00    3.40
  -3   6 -13    5.50    3.20
  -4  -6 -13    2.30    2.50
   4  -6  13    2.80    2.70
   4   6  13    1.10    3.40
  -4   6 -13    5.90    3.40
  -5  -6 -13    9.80    3.20
   5  -6  13    8.20    3.10
  -5   6 -13    7.70    3.90
   5   6  13    5.60    4.20
   6  -6  13   15.10    3.80
  -6  -6 -13   17.60    4.10
   6   6  13   21.30    5.20
  -6   6 -13   20.00    4.90
  -5  -7  13   12.40    3.80
   5  -7 -13    9.90    3.20
  -5   7  13    9.80    4.00
   5   7 -13    1.70    3.30
   4  -7 -13    2.10    2.60
  -4  -7  13    2.40    2.90
   4   7 -13    0.70    3.30
  -4   7  13   -0.60    3.30
   3  -7 -13   37.30    4.10
  -3  -7  13   35.70    4.30
   3   7 -13   32.80    4.50
  -3   7  13   43.30    5.40
  -2  -7  13   59.69    5.20
   2  -7 -13   46.50    4.20
  -2   7  13   49.10    5.40
   2   7 -13   51.19    5.60
   1  -7 -13   67.19    4.50
  -1  -7  13   71.29    5.20
  -1   7  13   68.79    5.60
  -1   7  13   68.99    6.00
   1   7 -13   86.79    6.70
   0  -7  13    9.40    2.40
   0  -7 -13    7.80    2.90
   0   7 -13    8.30    3.20
   0   7 -13   11.30    3.40
   0   7  13   12.40    3.50
  -1  -7 -13   17.30    3.60
   1  -7  13   16.80    3.50
   1   7  13   11.00    3.70
  -1   7 -13    7.60    3.20
  -2  -7 -13    4.70    2.80
   2  -7  13    7.90    2.90
   2   7  13    8.30    3.80
  -2   7 -13    5.00    3.30
   3  -7  13    3.70    2.70
  -3  -7 -13    4.40    2.80
  -3   7 -13    6.90    3.40
   3   7  13    2.70    3.60
  -4  -7 -13   37.70    4.70
   4  -7  13   28.30    4.20
  -4   7 -13   24.40    4.90
   4   7  13   21.40    5.00
  -3  -8  13   16.40    3.80
   3  -8 -13   17.40    3.50
  -3   8  13   15.90    4.50
   3   8 -13   14.90    4.20
  -2  -8  13   16.80    3.60
   2  -8 -13   24.20    3.50
  -2   8  13   13.90    4.10
   2   8 -13   21.00    4.40
  -1  -8  13   47.00    4.60
  -1   8  13   43.40    5.30
   1   8 -13   47.80    5.30
   0  -8 -13    0.60    2.70
   0   8  13    3.00    3.10
   1  -8  13    8.00    3.30
  -1  -8 -13   10.30    3.30
  -1   8 -13    5.90    3.40
   1   8  13   10.50    3.90
  -2  -8 -13   -0.10    2.60
   2  -8  13    1.20    2.90
   2   8  13    2.70    3.50
  -2   8 -13    7.40    3.60
  -9   0  14    9.40    3.60
   9   0 -14   11.60    3.30
   8   0 -14   26.70    3.80
  -8   0  14   26.50    4.00
   7   0 -14    5.60    2.30
  -7   0  14    2.30    2.30
   6   0 -14   13.60    2.00
  -6   0  14   15.70    2.10
  -6   0  14   14.40    2.80
   6   0 -14   13.60    2.60
   5   0 -14    0.00    1.30
  -5   0  14    1.60    1.40
   5   0 -14    0.90    1.70
  -5   0  14   -0.30    1.70
   4   0 -14   61.99    3.40
  -4   0  14   59.09    3.20
   4   0 -14   62.89    3.10
  -4   0  14   57.59    3.40
   3   0 -14   15.40    1.80
  -3   0  14   20.60    2.10
   3   0 -14   18.90    2.00
  -3   0  14   19.30    2.20
  -2   0  14  597.54   12.20
   2   0 -14  589.34   12.00
   2   0 -14  598.84   12.40
  -2   0  14  596.34   12.50
   1   0 -14    0.30    1.20
  -1   0  14    1.50    1.40
   1   0 -14    0.00    1.00
  -1   0  14   -0.70    1.10
   0   0  14  197.58    4.70
   0   0 -14  187.08    5.40
   0   0 -14  188.68    4.80
   0   0  14  194.28    5.60
  -1   0 -14   -0.40    0.90
  -1   0 -14    1.10    1.30
   1   0  14   -0.40    1.30
   1   0  14    0.70    1.00
  -2   0 -14    1.00    1.10
   2   0  14   -0.70    1.00
  -2   0 -14   -0.40    1.40
   2   0  14   -0.30    1.40
   3   0  14    5.70    1.50
  -3   0 -14    7.70    2.00
  -3   0 -14    6.20    1.60
   3   0  14    7.40    1.90
   4   0  14   27.20    3.10
   4   0  14   38.70    3.00
  -4   0 -14   34.10    2.90
  -4   0 -14   38.20    3.40
   5   0  14    0.50    1.70
  -5   0 -14   -1.50    1.80
  -5   0 -14    1.00    1.60
   5   0  14    0.90    2.00
  -6   0 -14   11.30    2.50
   6   0  14    9.90    2.40
   7   0  14    1.20    2.10
  -7   0 -14    2.30    2.20
   8   0  14   70.69    5.30
  -8   0 -14   71.09    5.10
   9  -1 -14    8.00    3.00
  -9  -1  14   10.30    3.40
  -9   1  14    8.50    3.50
   9   1 -14    4.60    3.10
   8  -1 -14   -2.10    2.00
  -8  -1  14   -1.90    2.30
  -8   1  14    0.40    2.90
   8   1 -14    3.00    2.60
   7  -1 -14   14.00    2.50
   7  -1 -14   13.50    2.70
  -7  -1  14   12.90    2.80
  -7  -1  14   14.70    3.30
   7   1 -14   13.20    3.10
  -7   1  14   19.30    3.70
   6  -1 -14  133.49    5.40
  -6  -1  14  128.09    5.20
   6  -1 -14  137.49    5.30
  -6  -1  14  141.49    5.60
   6   1 -14  131.49    6.00
  -6   1  14  124.99    6.10
  -5  -1  14    5.70    1.80
   5  -1 -14    5.00    1.70
   5  -1 -14    5.50    1.70
  -5  -1  14    1.60    1.70
  -5   1  14    3.90    1.50
   5   1 -14    3.70    1.40
   5   1 -14    5.10    2.00
  -5   1  14    3.90    2.20
  -4  -1  14  214.18    6.10
   4  -1 -14  219.98    6.40
  -4  -1  14  219.78    6.40
   4  -1 -14  232.08    6.00
  -4   1  14  207.48    6.80
   4   1 -14  213.48    5.90
   4   1 -14  219.98    6.80
  -4   1  14  216.28    6.00
  -3  -1  14    7.40    1.70
   3  -1 -14    9.10    1.40
  -3  -1  14    8.70    1.50
   3  -1 -14    9.60    1.70
   3   1 -14    7.80    1.80
   3   1 -14    6.50    1.50
  -3   1  14    6.30    1.80
  -3   1  14    7.20    1.60
   2  -1 -14  161.18    5.00
  -2  -1  14  167.78    5.20
  -2  -1  14  166.08    4.30
   2  -1 -14  163.38    4.10
   2   1 -14  159.58    4.90
  -2   1  14  176.18    5.50
   2   1 -14  167.08    5.20
  -2   1  14  162.38    5.10
   1  -1 -14    6.80    1.50
  -1  -1  14    6.60    1.50
  -1  -1  14    6.30    1.00
   1  -1 -14    7.00    0.90
   1   1 -14    5.60    1.50
  -1   1  14    6.20    1.50
   1   1 -14    5.80    1.60
  -1   1  14    7.00    1.80
   0  -1  14  135.39    4.40
   0  -1 -14  126.79    4.30
   0   1  14  125.49    4.60
   0   1 -14  131.39    4.40
   0   1  14  130.99    3.00
   0   1 -14  126.89    4.60
   0   1 -14  133.79    3.10
  -1  -1 -14   53.29    2.80
  -1  -1 -14   58.49    2.90
   1  -1  14   54.39    3.00
   1  -1  14   54.49    2.80
   1   1  14   53.49    2.00
  -1   1 -14   52.89    3.30
  -1   1 -14   60.29    2.10
   1   1  14   54.19    3.50
   2  -1  14  345.27    8.20
   2  -1  14  341.87    8.40
  -2  -1 -14  350.06    8.40
  -2  -1 -14  345.97    8.30
   2   1  14  355.36    9.30
  -2   1 -14  345.87    7.50
   2   1  14  344.37    7.40
  -2   1 -14  352.96    9.10
   3  -1  14    7.70    1.80
  -3  -1 -14    7.20    1.80
  -3  -1 -14    5.20    1.60
   3  -1  14    6.50    1.60
  -3   1 -14    8.50    1.50
   3   1  14    8.70    2.20
   3   1  14    9.20    1.50
  -3   1 -14    7.80    2.10
   4  -1  14  441.06   10.70
   4  -1  14  434.76   10.40
  -4  -1 -14  443.56   10.50
  -4  -1 -14  435.96   10.50
   4   1  14  451.85   10.10
  -4   1 -14  446.96   10.10
  -4   1 -14  437.96   11.40
   4   1  14  439.56   11.60
  -5  -1 -14   20.80    2.70
   5  -1  14   14.20    2.30
  -5   1 -14   23.70    2.70
   5   1  14   25.50    2.70
  -5   1 -14   13.80    2.70
   5   1  14   19.10    3.20
  -6  -1 -14  103.89    5.20
   6  -1  14  100.69    5.10
  -6   1 -14  108.49    5.00
  -6   1 -14  113.39    5.90
   6   1  14  100.09    5.00
  -7  -1 -14    1.90    2.30
   7  -1  14    8.40    2.70
  -7   1 -14    2.60    2.10
   7   1  14    4.80    2.40
   8  -1  14    3.40    2.50
  -8  -1 -14    2.90    2.50
   8   1  14    7.60    2.70
  -8   1 -14    4.30    2.30
  -9  -2  14    2.70    2.90
   9   2 -14    0.70    3.10
  -9   2  14    6.40    3.60
  -8  -2  14  109.49    6.10
   8  -2 -14  114.29    5.70
  -8   2  14  118.79    7.10
   8   2 -14  109.79    6.90
  -7  -2  14   13.70    2.60
  -7  -2  14   22.10    3.00
   7  -2 -14   19.50    3.00
  -7   2  14   11.10    3.30
   7   2 -14   14.60    3.30
  -6  -2  14    2.00    2.00
   6  -2 -14    0.20    1.70
   6  -2 -14    3.00    1.80
  -6  -2  14   -0.70    1.70
   6   2 -14    0.90    2.30
  -6   2  14    4.20    2.30
   5  -2 -14   18.20    2.50
   5  -2 -14   17.00    2.10
  -5  -2  14   17.90    2.70
  -5  -2  14   13.80    2.10
  -5   2  14   17.60    3.10
   5   2 -14   17.00    1.90
   5   2 -14   17.20    3.00
  -4  -2  14  162.98    5.80
   4  -2 -14  157.08    4.70
   4  -2 -14  174.08    5.80
  -4  -2  14  162.28    4.80
   4   2 -14  161.98    4.90
   4   2 -14  148.49    5.90
  -4   2  14  165.88    6.20
  -4   2  14  167.68    5.20
  -3  -2  14    7.20    1.90
   3  -2 -14    5.70    1.70
  -3  -2  14    7.80    1.30
   3  -2 -14    9.10    1.50
   3   2 -14    6.30    2.00
  -3   2  14    6.80    1.60
  -3   2  14   12.00    2.40
   3   2 -14    7.70    1.60
  -2  -2  14  191.78    5.90
   2  -2 -14  189.08    5.70
  -2  -2  14  185.78    4.30
  -2   2  14  193.08    6.30
   2   2 -14  189.18    6.10
  -2   2  14  192.58    5.80
   2   2 -14  180.48    5.50
   1  -2 -14   50.39    2.90
  -1  -2  14   58.59    3.20
  -1   2  14   54.59    3.60
   1   2 -14   55.99    3.20
  -1   2  14   48.70    3.30
   1   2 -14   53.19    3.40
   0  -2  14  629.94   13.00
   0  -2 -14  628.54   12.90
   0   2  14  626.24   13.70
   0   2 -14  633.24   13.50
   0   2 -14  603.14   13.60
   0   2  14  621.44   13.90
   1  -2  14   16.80    2.30
  -1  -2 -14   19.10    2.00
  -1  -2 -14   16.50    2.30
   1  -2  14   17.40    2.00
  -1   2 -14   18.30    2.60
   1   2  14   18.30    2.70
   1   2  14   17.90    1.20
   2  -2  14  143.69    4.70
   2  -2  14  142.69    5.10
  -2  -2 -14  152.08    5.10
  -2  -2 -14  142.59    4.50
  -2   2 -14  148.19    3.80
  -2   2 -14  146.79    5.80
   2   2  14  146.69    3.90
   2   2  14  137.69    5.90
  -3  -2 -14   89.79    3.70
  -3  -2 -14   93.69    4.20
   3  -2  14   97.79    4.40
   3  -2  14   94.49    3.90
  -3   2 -14   93.79    3.40
   3   2  14   89.29    4.90
  -3   2 -14  101.29    5.00
   3   2  14   95.99    3.50
   4  -2  14   59.79    3.80
  -4  -2 -14   62.39    3.90
  -4   2 -14   60.39    3.10
   4   2  14   61.39    3.30
   4   2  14   59.89    4.80
  -4   2 -14   60.59    4.90
   5  -2  14   88.79    4.70
  -5  -2 -14   80.59    4.60
   5   2  14   97.09    5.90
   5   2  14   95.89    4.30
  -5   2 -14   89.19    4.20
  -5   2 -14   82.19    5.40
   6  -2  14   90.79    5.10
  -6  -2 -14   79.49    4.80
   6   2  14   80.59    4.60
  -6   2 -14   82.59    5.90
  -6   2 -14   81.49    4.40
   6   2  14   75.99    6.00
   7  -2  14    9.30    2.80
  -7  -2 -14    9.80    2.80
   7   2  14    5.60    2.40
  -7   2 -14    5.20    2.20
  -8  -2 -14   24.90    3.90
   8  -2  14   22.60    3.60
   8   2  14   21.60    3.50
  -9   3  14   58.39    6.60
   9   3 -14   64.79    6.60
  -8  -3  14   10.00    2.80
   8  -3 -14    6.90    2.50
  -8   3  14    6.90    3.50
   8   3 -14    6.40    3.30
  -7  -3  14    2.10    2.20
   7  -3 -14    2.90    2.20
   7   3 -14    0.70    2.80
  -7   3  14    0.00    2.90
  -6  -3  14    2.50    2.10
   6  -3 -14    4.30    2.10
  -6   3  14    0.50    2.30
   6   3 -14   -0.10    2.40
  -5  -3  14  271.97    8.40
   5  -3 -14  261.47    8.20
   5   3 -14  266.47    9.10
  -5   3  14  256.87    9.10
   4  -3 -14   52.99    3.80
  -4  -3  14   56.99    3.80
  -4   3  14   62.79    3.50
  -4   3  14   58.79    4.80
   4   3 -14   59.19    4.50
   4   3 -14   55.99    3.20
  -3  -3  14  116.99    4.90
   3  -3 -14  121.19    5.00
  -3   3  14  119.19    4.80
   3   3 -14  114.89    4.50
   3   3 -14  120.79    5.30
  -3   3  14  119.19    5.80
   2  -3 -14   32.90    2.90
  -2  -3  14   35.90    3.00
  -2   3  14   29.80    3.00
  -2   3  14   34.00    3.50
   2   3 -14   38.30    3.00
   2   3 -14   32.90    3.30
   1  -3 -14  144.09    4.90
  -1  -3  14  155.18    5.30
  -1   3  14  142.09    5.60
   1   3 -14  144.39    5.30
  -1   3  14  147.49    5.90
   1   3 -14  145.99    5.70
   0  -3 -14  155.18    4.90
   0  -3  14  161.88    5.20
   0   3 -14  154.98    5.80
   0   3  14  152.08    6.00
   0   3 -14  156.08    5.90
   0   3  14  167.28    6.10
   1  -3  14   50.09    3.60
  -1  -3 -14   52.59    3.60
   1  -3  14   50.89    3.00
  -1  -3 -14   52.59    2.80
  -1   3 -14   51.49    4.10
   1   3  14   51.59    4.20
   2  -3  14   13.00    1.70
  -2  -3 -14   12.70    1.70
   2  -3  14   13.10    2.30
  -2  -3 -14   14.40    2.40
   2   3  14   12.00    2.70
  -2   3 -14    9.40    2.30
  -3  -3 -14  167.78    6.00
   3  -3  14  170.18    5.50
   3  -3  14  167.18    6.10
   3   3  14  172.38    7.30
  -3   3 -14  162.88    6.90
   4  -3  14  100.59    5.00
  -4  -3 -14   97.39    4.80
  -4   3 -14   99.89    6.10
   4   3  14   98.89    6.10
   5  -3  14   92.79    5.00
  -5  -3 -14   85.99    5.00
  -5   3 -14   82.59    5.80
   5   3  14   96.79    6.40
   6  -3  14   15.70    3.10
  -6  -3 -14   13.20    2.80
  -6   3 -14   16.90    3.80
   6   3  14   15.10    3.80
   7  -3  14   41.20    4.20
  -7  -3 -14   43.90    4.40
  -7   3 -14   61.39    6.10
   7   3  14   57.59    7.00
   8  -4 -14    4.90    2.60
  -8  -4  14    8.20    2.90
  -8   4  14    9.40    3.80
   8   4 -14    4.00    3.40
  -7  -4  14   60.69    5.20
   7  -4 -14   46.50    4.70
  -7   4  14   43.90    5.40
   7   4 -14   52.19    5.70
  -6  -4  14    6.20    2.70
   6  -4 -14   11.30    2.90
   6   4 -14    8.00    3.50
  -6   4  14    9.70    3.70
  -5  -4  14  128.99    6.20
   5  -4 -14  127.99    6.00
   5   4 -14  122.29    6.70
  -5   4  14  132.09    7.00
  -4  -4  14   29.50    3.60
   4  -4 -14   36.30    3.50
  -4   4  14   31.60    4.10
   4   4 -14   30.60    3.80
  -3  -4  14   25.60    2.90
   3  -4 -14   32.00    3.30
   3   4 -14   25.20    3.40
   3   4 -14   33.80    3.00
  -3   4  14   29.20    3.70
  -3   4  14   31.50    3.10
   2  -4 -14    2.70    1.70
  -2  -4  14    5.40    2.10
  -2   4  14    2.80    2.20
   2   4 -14    5.40    2.20
   2   4 -14    7.50    2.10
  -2   4  14    6.60    2.10
   1  -4 -14    1.60    1.50
  -1  -4  14    1.40    1.70
   1   4 -14    2.70    1.90
  -1   4  14    5.30    2.10
  -1   4  14    2.00    2.20
   1   4 -14    1.00    2.00
   0  -4  14   37.50    3.10
   0  -4 -14   33.70    2.70
   0   4 -14   34.30    3.50
   0   4 -14   38.40    3.80
   0   4  14   34.90    3.80
   0   4  14   30.10    3.50
   1  -4  14    8.90    2.50
   1  -4  14   11.60    1.90
  -1  -4 -14    9.40    1.70
  -1  -4 -14   11.40    2.50
  -1   4 -14    9.30    2.50
   1   4  14   13.00    2.90
  -2  -4 -14  138.39    5.70
   2  -4  14  130.19    4.60
  -2  -4 -14  133.29    4.30
   2  -4  14  130.69    5.70
   2   4  14  126.39    6.70
  -2   4 -14  124.59    6.20
   3  -4  14  266.17    8.40
  -3  -4 -14  267.67    8.50
   3   4  14  274.37   10.00
  -3   4 -14  276.97    9.60
   4  -4  14   41.80    4.00
  -4  -4 -14   39.80    4.00
   4   4  14   36.00    4.80
  -4   4 -14   36.20    4.50
   5  -4  14   14.90    2.90
  -5  -4 -14   14.60    3.10
  -5   4 -14   16.10    3.90
   5   4  14   14.40    3.70
  -6  -4 -14    6.70    2.40
   6  -4  14   11.20    2.90
  -6   4 -14   10.90    3.70
   6   4  14    9.20    3.70
   7  -4  14   43.80    4.40
  -7  -4 -14   44.80    4.80
   7   4  14   42.00    5.60
  -7   4 -14   62.29    6.50
   7  -5 -14   94.79    6.10
  -7  -5  14   98.39    6.50
  -7   5  14   88.99    6.80
   7   5 -14   97.59    7.40
   6  -5 -14    7.80    2.80
  -6  -5  14    3.20    2.60
  -6   5  14    8.00    3.70
   6   5 -14    9.20    3.70
   5  -5 -14  290.07    9.60
  -5  -5  14  304.97   10.10
   5   5 -14  287.07   10.50
  -5   5  14  298.87   11.00
  -4  -5  14    4.30    2.70
   4  -5 -14    6.20    2.50
  -4   5  14    6.60    3.20
   4   5 -14    3.30    2.90
  -3  -5  14  217.58    7.80
   3  -5 -14  189.38    7.00
  -3   5  14  204.68    8.40
   3   5 -14  182.88    8.00
  -2  -5  14    1.80    2.10
   2  -5 -14    3.80    1.90
  -2   5  14    1.40    2.00
   2   5 -14    1.00    1.80
  -2   5  14    6.90    3.00
   2   5 -14    1.50    2.10
   1  -5 -14   50.59    3.50
  -1  -5  14   55.59    4.00
   1   5 -14   60.49    4.90
  -1   5  14   63.49    5.00
   1   5 -14   56.19    4.40
  -1   5  14   57.79    5.10
   0  -5  14   -0.80    1.60
   0  -5 -14    0.20    1.40
   0   5  14    1.10    2.50
   0   5  14    0.60    2.20
   0   5 -14    2.10    2.30
   0   5 -14    0.80    2.20
  -1  -5 -14  530.45   11.70
   1  -5  14  529.35   12.10
   1  -5  14  539.65   13.50
  -1  -5 -14  508.45   13.30
  -1   5 -14  545.65   14.10
   1   5  14  507.75   14.40
  -2  -5 -14    6.60    2.30
   2  -5  14    7.60    2.50
  -2   5 -14    7.20    2.90
   2   5  14    6.50    3.00
   3  -5  14  130.79    6.30
  -3  -5 -14  137.49    6.30
  -3   5 -14  124.39    7.00
   3   5  14  127.39    7.30
   4  -5  14    3.80    2.30
  -4  -5 -14    0.60    2.30
   4   5  14    3.40    3.60
  -4   5 -14    9.60    3.70
  -5  -5 -14   18.70    3.10
   5  -5  14   18.50    3.30
  -5   5 -14   17.60    4.10
   5   5  14   24.10    4.70
  -6  -5 -14    5.10    2.70
   6  -5  14    4.20    2.70
  -6   5 -14    4.50    3.60
   6   5  14    6.10    3.80
   6  -6 -14    0.70    2.40
  -6  -6  14   -0.30    2.60
   6   6 -14   -1.10    3.10
  -6   6  14    0.50    3.10
   5  -6 -14   55.59    5.30
  -5  -6  14   48.60    5.10
   5   6 -14   46.00    5.50
  -5   6  14   40.70    5.10
  -4  -6  14   32.90    4.30
   4  -6 -14   27.40    3.60
   4   6 -14   21.90    4.20
  -4   6  14   29.90    4.50
   3  -6 -14   11.60    2.70
  -3  -6  14    8.90    3.00
  -3   6  14    7.40    3.40
   3   6 -14    8.70    3.20
  -2  -6  14   23.50    3.40
   2  -6 -14   33.80    3.60
  -2   6  14   24.30    3.90
  -2   6  14   23.90    3.50
   2   6 -14   28.60    4.00
  -1  -6  14   15.80    2.80
   1  -6 -14   21.10    2.80
   1   6 -14   12.60    3.00
  -1   6  14   15.80    3.40
   1   6 -14   21.60    3.70
  -1   6  14   23.30    3.90
   0  -6  14    5.60    2.10
   0  -6 -14    7.10    1.90
   0   6 -14    4.90    2.80
   0   6 -14    6.00    2.80
   0   6  14    8.60    3.10
   1  -6  14   10.60    3.10
  -1  -6 -14   11.40    3.00
   1   6  14   20.80    3.90
  -1   6 -14    9.40    3.20
  -2  -6 -14    3.40    2.50
   2  -6  14    3.50    2.60
  -2   6 -14    2.30    2.90
   2   6  14    5.60    3.20
   3  -6  14   13.90    3.20
  -3  -6 -14   14.40    3.20
   3   6  14   16.80    3.90
  -3   6 -14   18.30    4.10
   4  -6  14    1.80    2.90
  -4  -6 -14    5.20    2.70
  -4   6 -14    4.90    3.30
   4   6  14    3.80    3.80
  -5  -6 -14   92.69    6.20
   5  -6  14   91.39    6.20
  -5   6 -14   83.59    7.40
   5   6  14   99.79    8.30
  -5  -7  14    3.90    3.30
   5  -7 -14   -2.20    2.30
  -5   7  14    1.00    3.30
   5   7 -14   -2.80    3.00
  -4  -7  14    9.00    3.20
   4  -7 -14    6.70    2.80
   4   7 -14   -1.00    3.30
  -4   7  14    7.90    3.50
  -3  -7  14   18.40    3.60
   3  -7 -14   14.00    2.90
   3   7 -14   17.60    4.10
  -3   7  14   19.50    4.10
   2  -7 -14   64.19    4.70
  -2  -7  14   56.39    4.90
   2   7 -14   67.19    6.30
  -2   7  14   67.59    6.40
  -1  -7  14   14.00    2.90
   1  -7 -14   14.40    2.70
  -1   7  14   13.30    3.40
  -1   7  14   10.20    3.60
   1   7 -14   13.10    3.60
   0  -7  14    9.10    2.40
   0  -7 -14    3.60    2.60
   0   7  14    8.80    3.30
   0   7 -14    4.10    3.10
   0   7 -14    9.50    3.30
   1  -7  14    5.60    3.10
  -1  -7 -14    1.40    2.70
  -1   7 -14    6.30    3.10
   1   7  14    2.20    3.10
   2  -7  14    2.70    2.80
  -2  -7 -14    1.80    2.70
   2   7  14   -1.90    2.80
  -2   7 -14    1.50    3.00
   3  -7  14    9.00    3.20
  -3  -7 -14   11.60    3.00
   3   7  14    8.00    4.20
  -3   7 -14    7.30    3.60
   4  -7  14   89.59    6.30
  -4  -7 -14   87.89    6.30
  -4   7 -14  103.89    8.40
   4   7  14   99.39    8.60
  -3  -8  14   -4.10    2.70
   3  -8 -14    1.10    2.30
  -3   8  14   -1.70    2.90
   3   8 -14    0.00    3.40
   2  -8 -14   82.99    5.30
  -2  -8  14   87.89    6.30
   2   8 -14   81.39    7.10
  -2   8  14   86.09    7.40
  -1  -8  14   14.90    3.20
   1   8 -14   13.70    4.00
   0  -8 -14   26.70    4.30
   0   8  14   22.00    4.40
  -1  -8 -14    5.00    3.20
   1  -8  14    4.90    3.10
   1   8  14   12.30    4.10
  -1   8 -14    5.80    3.10
   2  -8  14   -1.50    2.70
  -2  -8 -14    2.20    2.90
  -2   8 -14   -0.50    3.10
   2   8  14    0.70    3.40
  -9   0  15   29.40    4.60
   9   0 -15   23.20    3.80
   8   0 -15    0.30    2.30
  -8   0  15    0.80    2.50
  -7   0  15   14.80    3.20
   7   0 -15    9.30    2.70
  -6   0  15    4.10    1.60
   6   0 -15    4.40    2.10
   6   0 -15    3.60    1.60
  -6   0  15    3.80    2.30
   5   0 -15   23.00    2.70
   5   0 -15   23.40    2.40
  -5   0  15   22.50    2.40
  -5   0  15   22.00    2.80
  -4   0  15    8.00    1.90
   4   0 -15    5.80    1.70
   4   0 -15    6.50    1.60
  -4   0  15    5.80    1.60
  -3   0  15   47.30    3.00
   3   0 -15   48.40    2.90
   3   0 -15   49.30    2.90
  -3   0  15   48.30    2.90
   2   0 -15    5.50    1.40
   2   0 -15    6.80    1.60
  -2   0  15    6.80    1.40
  -2   0  15    7.30    1.60
   1   0 -15  362.86    7.90
   1   0 -15  372.16    8.60
  -1   0  15  365.46    8.20
  -1   0  15  361.46    8.70
   0   0 -15    6.10    1.20
   0   0 -15    6.50    1.50
   0   0  15    4.80    1.10
   0   0  15    5.70    1.70
   1   0  15  171.38    4.50
  -1   0 -15  163.68    4.50
   1   0  15  170.98    5.50
  -1   0 -15  165.98    5.40
  -2   0 -15    1.60    1.20
  -2   0 -15   -0.10    1.40
   2   0  15    2.80    1.20
   2   0  15    0.40    1.50
   3   0  15   64.09    3.20
  -3   0 -15   60.69    3.10
   3   0  15   58.99    3.90
  -3   0 -15   61.59    3.80
   4   0  15   -1.70    1.90
  -4   0 -15   -0.40    1.30
   4   0  15    0.90    1.50
  -4   0 -15    0.90    1.70
   5   0  15  152.68    6.40
  -5   0 -15  140.19    6.00
  -5   0 -15  148.69    5.50
   5   0  15  144.49    5.40
   6   0  15    2.30    2.10
  -6   0 -15    2.40    2.00
   7   0  15   -0.50    2.00
  -7   0 -15   -3.30    1.80
  -8   0 -15   -2.90    2.00
   8   0  15   -0.70    2.20
   9  -1 -15   41.80    5.00
  -9  -1  15   46.10    5.30
   9   1 -15   33.50    4.50
  -9   1  15   47.90    5.70
   8  -1 -15    4.60    2.50
  -8  -1  15    4.90    2.80
  -8   1  15    7.30    3.30
   8   1 -15   11.40    3.20
  -7  -1  15   58.99    4.80
   7  -1 -15   53.39    3.90
   7  -1 -15   45.60    4.00
  -7  -1  15   52.59    4.10
  -7   1  15   65.89    5.50
   7   1 -15   48.00    4.40
  -6  -1  15   17.80    2.50
  -6  -1  15   11.30    2.50
   6  -1 -15   13.70    2.40
   6  -1 -15   13.00    2.30
  -6   1  15   10.90    2.70
   6   1 -15    9.60    2.60
  -5  -1  15   59.19    3.70
   5  -1 -15   60.19    3.70
  -5  -1  15   59.29    3.60
   5  -1 -15   60.59    3.50
   5   1 -15   62.49    3.30
  -5   1  15   56.49    4.20
   5   1 -15   53.49    4.10
  -5   1  15   64.49    3.30
  -4  -1  15   13.00    2.10
  -4  -1  15   13.40    2.00
   4  -1 -15   13.80    1.90
   4  -1 -15   20.40    2.40
   4   1 -15   16.50    2.40
  -4   1  15   13.90    1.90
  -4   1  15   21.00    2.80
   4   1 -15   18.30    2.00
  -3  -1  15  161.48    4.60
   3  -1 -15  155.28    4.40
   3  -1 -15  162.78    5.20
  -3  -1  15  163.18    5.30
  -3   1  15  150.48    5.00
  -3   1  15  151.58    5.50
   3   1 -15  157.88    4.90
   3   1 -15  162.18    5.50
  -2  -1  15   62.09    2.60
   2  -1 -15   61.29    2.40
   2  -1 -15   57.99    3.10
  -2  -1  15   67.59    3.40
  -2   1  15   60.29    3.40
  -2   1  15   54.99    3.00
   2   1 -15   60.99    3.20
   2   1 -15   56.39    3.00
  -1  -1  15    2.50    0.90
  -1  -1  15    2.30    1.30
   1  -1 -15    1.60    1.30
  -1   1  15    1.40    1.50
  -1   1  15    2.00    1.50
   1   1 -15    2.20    1.40
   1   1 -15    3.20    1.40
   0  -1  15   31.00    2.60
   0  -1 -15   23.50    2.10
   0   1  15   22.50    2.40
   0   1 -15   25.00    2.50
   0   1  15   25.20    1.30
   0   1 -15   24.80    1.40
   1  -1  15  185.98    5.20
  -1  -1 -15  170.48    5.10
   1  -1  15  187.78    5.50
  -1  -1 -15  184.58    5.40
  -1   1 -15  174.38    5.80
   1   1  15  182.78    4.20
  -1   1 -15  178.88    4.20
   1   1  15  179.58    6.10
  -2  -1 -15   65.19    3.40
   2  -1  15   60.19    3.20
  -2  -1 -15   66.19    3.30
   2  -1  15   69.59    3.50
   2   1  15   71.59    4.10
  -2   1 -15   62.89    2.60
   2   1  15   64.99    2.60
  -2   1 -15   64.69    3.90
   3  -1  15   33.20    2.70
  -3  -1 -15   31.60    2.70
   3  -1  15   35.30    3.00
  -3  -1 -15   33.00    2.80
   3   1  15   29.20    2.20
   3   1  15   32.50    3.40
  -3   1 -15   28.90    3.10
  -3   1 -15   28.50    2.20
  -4  -1 -15   99.49    4.40
  -4  -1 -15  102.19    4.50
   4  -1  15  103.09    4.70
   4  -1  15   98.99    4.40
  -4   1 -15   94.89    4.00
  -4   1 -15  100.39    5.10
   4   1  15   92.09    5.40
   4   1  15   97.99    4.00
  -5  -1 -15   13.00    2.40
   5  -1  15   13.60    2.50
  -5   1 -15   16.50    3.00
   5   1  15   13.20    2.20
  -5   1 -15   14.00    2.30
   5   1  15    6.80    2.70
   6  -1  15   13.80    2.70
  -6  -1 -15    9.20    2.40
  -6   1 -15   11.60    3.10
  -6   1 -15   12.10    2.50
   6   1  15   10.20    2.50
  -7  -1 -15    9.40    2.80
   7  -1  15    8.30    2.40
   7   1  15   10.60    2.80
  -7   1 -15   11.40    2.60
  -8  -1 -15   11.20    3.10
   8  -1  15    6.90    2.70
  -8   1 -15    6.00    2.60
   8   1  15    5.70    2.60
  -9   2  15   34.50    5.10
   9   2 -15   27.60    4.60
   8  -2 -15   61.89    4.70
   8   2 -15   54.79    5.20
  -8   2  15   72.59    6.40
  -7  -2  15   59.29    4.30
  -7  -2  15   61.89    4.60
   7  -2 -15   67.99    4.40
  -7   2  15   63.39    5.70
   7   2 -15   55.79    5.00
  -6  -2  15   27.90    3.30
  -6  -2  15   27.40    3.00
   6  -2 -15   30.30    3.40
  -6   2  15   31.40    4.00
   6   2 -15   29.60    3.80
  -5  -2  15    8.10    2.20
   5  -2 -15    8.50    2.20
  -5  -2  15    9.90    2.10
   5   2 -15    7.70    1.70
  -5   2  15    9.40    2.80
   5   2 -15   10.00    2.50
  -5   2  15    8.20    2.70
   4  -2 -15   98.49    4.50
  -4  -2  15   99.39    4.10
  -4  -2  15   99.09    4.60
  -4   2  15  102.69    5.30
  -4   2  15  106.29    4.20
   4   2 -15   98.89    3.90
   4   2 -15   98.89    4.90
  -3  -2  15   85.59    4.00
   3  -2 -15   89.89    4.10
  -3   2  15   87.89    4.80
   3   2 -15   96.29    4.60
  -3   2  15   91.69    3.90
   3   2 -15   90.19    3.90
   2  -2 -15   19.00    2.20
  -2  -2  15   21.20    2.50
   2   2 -15   18.10    2.50
  -2   2  15   23.10    2.50
   2   2 -15   21.80    2.40
  -2   2  15   19.10    2.50
   1  -2 -15  310.67    7.90
  -1  -2  15  320.67    8.10
  -1   2  15  313.27    8.50
   1   2 -15  321.37    8.30
  -1   2  15  325.67    8.70
   1   2 -15  343.97    8.60
   0  -2  15  236.38    6.60
   0  -2 -15  257.67    6.50
   0   2  15  235.88    7.10
   0   2  15  248.68    7.50
   0   2 -15  243.58    7.00
   0   2 -15  241.98    7.10
   1  -2  15   11.40    1.70
   1  -2  15   12.30    2.00
  -1  -2 -15   14.60    2.10
  -1  -2 -15   11.30    1.60
  -1   2 -15   11.80    2.20
   1   2  15   12.80    2.50
  -2  -2 -15   64.69    3.20
  -2  -2 -15   67.49    3.60
   2  -2  15   66.89    3.70
   2  -2  15   67.59    3.30
  -2   2 -15   73.19    4.40
   2   2  15   66.69    4.50
   3  -2  15   79.99    4.10
  -3  -2 -15   69.29    3.80
   3  -2  15   71.59    3.60
  -3  -2 -15   66.49    3.40
  -3   2 -15   73.29    4.70
   3   2  15   72.79    3.10
   3   2  15   73.39    4.90
  -4  -2 -15   11.80    2.40
   4  -2  15   13.30    2.50
   4   2  15   14.80    2.00
  -4   2 -15   11.90    2.70
   4   2  15   14.60    3.10
  -5  -2 -15   51.49    4.10
   5  -2  15   36.70    3.40
   5   2  15   43.70    3.40
  -5   2 -15   38.30    4.30
   5   2  15   43.10    4.70
  -6  -2 -15   55.69    4.60
   6  -2  15   46.80    4.10
   6   2  15   45.70    4.90
  -6   2 -15   52.49    5.00
   6   2  15   54.99    3.90
   7  -2  15    9.40    2.90
  -7  -2 -15    8.10    2.70
   7   2  15   10.40    2.70
  -8  -2 -15   24.20    3.70
   8  -2  15   18.90    3.40
   8   2  15   14.40    3.60
   8  -3 -15   15.40    3.10
  -8  -3  15   15.00    3.20
   8   3 -15   18.80    4.20
  -8   3  15   22.10    4.40
  -7  -3  15   31.80    3.60
   7  -3 -15   30.10    3.70
  -7   3  15   24.60    4.30
   7   3 -15   28.20    3.90
  -6  -3  15   71.39    4.70
   6  -3 -15   72.29    4.80
  -6   3  15   78.19    6.20
   6   3 -15   70.39    5.60
  -5  -3  15   15.60    2.70
   5  -3 -15   18.40    2.80
  -5   3  15   20.30    3.70
   5   3 -15   19.30    3.10
  -4  -3  15    3.30    2.00
   4  -3 -15    2.20    1.80
  -4   3  15    4.30    1.60
   4   3 -15    0.30    2.20
  -4   3  15    8.90    2.80
   4   3 -15    2.60    1.50
  -3  -3  15   38.90    3.40
   3  -3 -15   37.70    3.20
  -3   3  15   38.60    3.20
   3   3 -15   37.50    3.00
  -3   3  15   36.10    3.80
   3   3 -15   36.80    3.70
  -2  -3  15   77.59    4.20
   2  -3 -15   74.79    3.80
  -2   3  15   76.49    4.20
  -2   3  15   68.49    4.60
   2   3 -15   78.09    3.90
   2   3 -15   71.99    4.20
   1  -3 -15  125.99    4.60
  -1  -3  15  120.79    4.70
   1   3 -15  121.19    5.40
   1   3 -15  126.39    5.20
  -1   3  15  123.69    5.60
  -1   3  15  116.69    5.30
   0  -3  15  348.77    8.50
   0  -3 -15  346.77    8.30
   0   3 -15  335.67    9.30
   0   3  15  335.27    9.60
   0   3 -15  327.97    9.20
   0   3  15  332.07    9.40
   1  -3  15    8.90    1.70
  -1  -3 -15    8.80    1.60
  -1  -3 -15   12.40    2.40
   1  -3  15    7.90    2.10
   1   3  15    8.60    2.50
  -1   3 -15    8.00    2.40
  -2  -3 -15   28.70    2.30
   2  -3  15   29.50    3.00
  -2  -3 -15   29.90    3.10
   2  -3  15   22.50    2.30
  -2   3 -15   27.80    3.40
   2   3  15   36.80    4.10
   3  -3  15    9.50    2.10
   3  -3  15    9.30    2.60
  -3  -3 -15    9.00    2.30
  -3   3 -15    8.20    2.50
   3   3  15    7.90    2.80
   4  -3  15   24.70    3.10
  -4  -3 -15   18.30    2.90
  -4   3 -15   16.30    3.40
   4   3  15   18.10    3.70
   5  -3  15    2.80    2.10
  -5  -3 -15   -1.40    2.00
  -5   3 -15    2.70    2.80
   5   3  15    1.30    2.90
  -6  -3 -15   22.30    3.40
   6  -3  15   32.60    3.80
   6   3  15   26.40    4.50
  -6   3 -15   31.60    4.70
   7  -3  15    2.50    2.40
  -7  -3 -15   -0.10    2.20
  -7   3 -15    2.60    3.20
  -8  -4  15   31.30    4.10
   8  -4 -15   31.00    4.30
  -8   4  15   19.50    4.50
   8   4 -15   31.40    5.10
   7  -4 -15    3.70    2.60
  -7  -4  15   13.30    3.10
  -7   4  15    9.40    3.80
   7   4 -15   11.60    3.80
  -6  -4  15    3.70    2.50
   6  -4 -15   -0.60    2.00
   6   4 -15    7.40    3.30
  -6   4  15    6.40    3.30
  -5  -4  15    3.10    2.30
   5  -4 -15    2.20    2.20
   5   4 -15    0.20    2.70
  -5   4  15    2.50    2.90
  -4  -4  15  158.18    6.50
   4  -4 -15  138.69    6.00
  -4   4  15  142.49    6.90
   4   4 -15  141.19    6.60
  -3  -4  15    4.80    2.00
   3  -4 -15    6.10    2.10
  -3   4  15    1.60    2.20
   3   4 -15    7.70    2.00
  -3   4  15    6.90    2.10
   3   4 -15    4.00    2.40
   2  -4 -15    9.80    2.20
  -2  -4  15   10.60    2.40
   2   4 -15    6.70    2.30
  -2   4  15   13.50    3.00
   2   4 -15   10.60    2.30
  -2   4  15    8.40    2.30
  -1  -4  15    5.90    2.00
   1  -4 -15    5.40    1.70
  -1   4  15    7.90    2.40
   1   4 -15    5.90    2.50
  -1   4  15    5.00    2.50
   1   4 -15    5.70    2.20
   0  -4  15  415.16   10.10
   0  -4 -15  396.76    9.70
   0   4 -15  400.96   11.10
   0   4  15  428.96   11.60
   0   4 -15  393.16   11.00
   0   4  15  418.16   11.40
   1  -4  15   40.90    2.90
  -1  -4 -15   42.10    2.80
   1  -4  15   40.70    3.60
  -1  -4 -15   51.49    4.10
   1   4  15   34.80    4.00
  -1   4 -15   43.70    4.10
  -2  -4 -15  248.38    7.80
   2  -4  15  226.68    7.60
  -2  -4 -15  216.38    6.20
   2  -4  15  220.38    6.40
   2   4  15  233.78    8.60
  -2   4 -15  227.68    8.40
  -3  -4 -15   20.70    3.10
   3  -4  15   31.00    3.50
  -3   4 -15   17.30    3.40
   3   4  15   29.20    4.20
  -4  -4 -15   61.39    4.50
   4  -4  15   60.19    4.70
  -4   4 -15   73.79    6.20
   4   4  15   58.39    5.50
  -5  -4 -15   13.90    3.00
   5  -4  15   10.80    2.80
   5   4  15   11.10    3.80
  -5   4 -15   11.50    3.70
  -6  -4 -15   33.50    3.90
   6  -4  15   32.50    4.10
  -6   4 -15   34.10    4.90
   6   4  15   31.80    5.10
   7  -4  15   16.40    3.30
  -7  -4 -15   21.80    3.80
  -7   4 -15   17.10    4.50
   7   4  15   17.70    4.60
  -7  -5  15   12.40    3.40
   7  -5 -15    6.00    2.80
  -7   5  15   10.70    4.10
   7   5 -15    9.50    3.80
   6  -5 -15   66.69    5.60
  -6  -5  15   74.89    5.70
  -6   5  15   53.99    5.90
   6   5 -15   55.49    5.70
  -5  -5  15   10.80    2.90
   5  -5 -15   13.00    2.90
   5   5 -15   12.20    3.70
  -5   5  15   11.40    3.50
  -4  -5  15   11.00    2.90
   4  -5 -15   10.50    2.60
   4   5 -15    9.40    3.30
  -4   5  15    8.40    3.30
   3  -5 -15    2.60    2.00
  -3  -5  15    7.30    2.30
   3   5 -15   -1.30    2.60
  -3   5  15    5.00    3.00
  -2  -5  15   45.60    3.90
   2  -5 -15   53.19    4.00
   2   5 -15   50.69    4.10
   2   5 -15   49.90    4.80
  -2   5  15   43.40    4.10
  -2   5  15   55.79    5.20
   1  -5 -15    3.10    1.70
  -1  -5  15    4.30    2.10
   1   5 -15    6.10    2.40
  -1   5  15    2.60    2.70
   1   5 -15    3.90    2.30
  -1   5  15    3.80    2.40
   0  -5 -15  229.48    6.80
   0  -5  15  226.08    7.20
   0   5  15  209.78    8.50
   0   5 -15  229.48    8.30
   0   5  15  225.38    8.50
   0   5 -15  212.98    8.10
   1  -5  15    9.90    2.00
   1  -5  15   10.50    2.90
  -1  -5 -15   12.40    1.90
  -1  -5 -15   13.70    2.80
   1   5  15    7.10    2.80
  -1   5 -15   18.30    3.40
   2  -5  15  144.99    6.50
  -2  -5 -15  152.28    6.60
  -2   5 -15  153.18    7.40
   2   5  15  159.18    8.00
  -3  -5 -15   30.90    3.70
   3  -5  15   27.70    3.50
   3   5  15   34.00    5.10
  -3   5 -15   29.00    4.40
  -4  -5 -15    3.50    2.40
   4  -5  15    3.10    2.50
  -4   5 -15    1.80    3.10
   4   5  15    6.80    3.60
   5  -5  15    1.30    2.50
  -5  -5 -15    1.60    2.10
  -5   5 -15   -0.80    3.10
   5   5  15    4.30    3.70
  -6  -5 -15   34.90    4.20
   6  -5  15   37.90    4.50
   6   5  15   32.30    5.30
  -6   5 -15   28.20    5.00
   6  -6 -15   34.90    4.20
  -6  -6  15   28.30    4.10
  -6   6  15   36.50    5.20
   6   6 -15   36.20    5.10
  -5  -6  15    1.50    2.70
   5  -6 -15    4.00    2.70
   5   6 -15   -1.80    3.40
  -5   6  15    2.10    3.00
  -4  -6  15   46.90    4.80
   4  -6 -15   64.69    5.20
   4   6 -15   57.69    5.90
  -4   6  15   58.89    6.00
  -3  -6  15   19.50    3.50
   3  -6 -15   16.60    3.00
   3   6 -15   19.50    4.00
  -3   6  15   21.10    4.20
  -2  -6  15   33.50    3.90
   2  -6 -15   33.20    3.60
  -2   6  15   28.50    4.20
   2   6 -15   35.00    4.40
  -2   6  15   29.70    3.90
   1  -6 -15    2.90    1.90
  -1  -6  15    3.70    2.20
   1   6 -15    0.50    2.20
  -1   6  15    5.00    2.70
   1   6 -15    4.80    2.70
  -1   6  15    6.70    3.20
   0  -6  15   59.29    4.40
   0  -6 -15   70.99    4.00
   0   6  15   64.69    5.80
   0   6 -15   74.39    5.60
   0   6 -15   71.59    5.40
  -1  -6 -15    4.40    2.50
   1  -6  15    0.70    2.60
  -1   6 -15    1.30    2.70
   1   6  15   -0.10    2.70
   2  -6  15    4.30    2.50
  -2  -6 -15    2.50    2.30
  -2   6 -15    2.00    3.00
   2   6  15    6.10    3.30
  -3  -6 -15    8.70    3.00
   3  -6  15   13.00    3.30
   3   6  15   16.90    4.40
  -3   6 -15   16.10    3.90
  -4  -6 -15   40.50    4.30
   4  -6  15   35.60    4.20
   4   6  15   39.30    5.70
  -4   6 -15   56.79    5.90
  -5  -6 -15   24.90    4.10
   5  -6  15   13.10    3.60
  -5   6 -15   22.90    4.80
   5   6  15   15.40    4.80
  -5  -7  15   47.60    5.30
   5  -7 -15   51.59    5.30
   5   7 -15   46.90    5.90
  -5   7  15   45.60    5.90
  -4  -7  15    8.10    3.20
   4  -7 -15    4.10    2.50
  -4   7  15    3.40    3.40
   4   7 -15    3.70    3.60
   3  -7 -15    6.60    2.60
  -3  -7  15    2.80    3.00
  -3   7  15    5.60    3.50
   3   7 -15    2.70    3.20
   2  -7 -15   42.20    4.10
  -2  -7  15   50.89    4.90
   2   7 -15   42.20    4.90
  -2   7  15   37.10    5.00
   1  -7 -15    6.10    2.30
  -1  -7  15   12.00    3.00
  -1   7  15    5.80    3.30
   1   7 -15    4.40    3.40
  -1   7  15    6.50    3.20
   0  -7  15   27.60    3.50
   0  -7 -15   25.90    4.00
   0   7 -15   36.30    4.90
   0   7 -15   27.00    4.30
   0   7  15   23.20    4.30
  -1  -7 -15    3.00    2.50
   1  -7  15    8.90    3.30
   1   7  15    1.70    3.10
  -1   7 -15    5.00    3.10
   2  -7  15    2.60    2.80
  -2  -7 -15    0.90    2.50
  -2   7 -15   11.00    3.40
   2   7  15   12.10    4.00
   3  -7  15   28.40    4.10
  -3  -7 -15   30.10    4.40
   3   7  15   49.80    6.20
  -3   7 -15   36.10    5.10
  -4  -7 -15   42.10    4.90
   4  -7  15   31.10    4.50
   4   7  15   49.50    6.70
  -4   7 -15   49.60    6.20
   3  -8 -15   31.10    4.10
  -3  -8  15   26.10    4.40
  -3   8  15   40.40    5.80
   3   8 -15   25.30    5.50
   2  -8 -15    7.50    2.60
  -2  -8  15    6.20    3.00
   2   8 -15    9.90    3.90
  -2   8  15   12.60    3.90
  -1  -8  15  154.98    7.50
   1   8 -15  146.99    8.40
   0  -8  15    1.50    3.10
   0  -8 -15    3.90    3.10
   0   8  15    2.90    3.30
   1  -8  15   36.00    4.70
  -1  -8 -15   35.80    4.60
  -1   8 -15   44.40    5.40
   1   8  15   42.00    5.70
   9   0 -16    0.70    2.60
  -9   0  16    1.90    3.20
   8   0 -16   43.00    4.50
  -8   0  16   49.90    4.80
  -7   0  16   -1.90    2.30
   7   0 -16    1.70    2.10
   6   0 -16  121.39    4.80
  -6   0  16  120.19    4.70
   6   0 -16  107.39    5.20
  -6   0  16  114.39    5.70
  -5   0  16   -0.40    1.80
   5   0 -16    1.90    1.70
   5   0 -16    0.00    1.40
  -5   0  16    2.40    1.50
  -4   0  16  178.68    5.80
  -4   0  16  194.78    6.10
   4   0 -16  183.18    5.80
   4   0 -16  190.58    5.90
  -3   0  16   10.90    1.90
  -3   0  16   13.50    1.90
   3   0 -16   12.90    1.90
   3   0 -16    9.60    1.80
   2   0 -16  512.65   11.30
   2   0 -16  535.65   10.90
  -2   0  16  522.25   11.10
  -2   0  16  501.95   11.40
   1   0 -16    1.00    1.10
   1   0 -16   -0.90    1.20
  -1   0  16   -1.10    1.30
  -1   0  16   -0.40    1.20
   0   0  16    4.30    1.60
   0   0 -16    3.80    1.10
   0   0  16    4.30    1.10
   0   0 -16    0.50    1.40
   1   0  16    0.50    1.40
  -1   0 -16   -0.90    0.90
   1   0  16    0.20    1.10
  -1   0 -16    0.00    1.40
  -2   0 -16    0.90    1.60
   2   0  16   -0.40    1.10
  -2   0 -16    0.50    1.10
   2   0  16   -0.10    1.60
   3   0  16    3.90    1.40
  -3   0 -16    3.10    1.50
  -3   0 -16    3.60    1.80
   3   0  16    3.80    2.00
  -4   0 -16   80.19    4.50
   4   0  16   90.19    3.90
   4   0  16   76.79    4.80
  -4   0 -16   86.19    3.90
  -5   0 -16   30.00    3.50
   5   0  16   30.20    3.70
   5   0  16   28.00    2.90
  -5   0 -16   28.00    3.00
   6   0  16   44.40    3.90
  -6   0 -16   51.99    4.30
  -7   0 -16   40.50    3.90
   7   0  16   54.39    4.60
   8   0  16   88.79    5.70
  -8   0 -16   91.59    5.80
  -9  -1  16    7.30    3.30
   9   1 -16    9.70    3.50
  -9   1  16    6.50    3.40
  -8  -1  16   12.20    3.20
   8   1 -16    8.10    3.00
  -8   1  16    6.70    3.20
   7  -1 -16    1.30    1.80
  -7  -1  16    2.80    2.30
  -7  -1  16   -1.40    1.60
   7  -1 -16    2.70    2.10
  -7   1  16    2.00    2.70
   7   1 -16    1.80    2.40
  -6  -1  16   74.39    4.40
  -6  -1  16   79.09    4.20
   6  -1 -16   76.89    4.30
   6  -1 -16   75.19    4.30
   6   1 -16   73.49    3.90
   6   1 -16   70.99    4.80
  -6   1  16   72.39    5.10
   5  -1 -16   13.00    2.10
  -5  -1  16    5.40    1.90
   5  -1 -16    9.70    2.10
  -5  -1  16   10.80    2.10
  -5   1  16   12.50    2.00
  -5   1  16   13.90    2.80
   5   1 -16    9.20    1.80
   5   1 -16   10.20    2.30
   4  -1 -16   71.69    3.70
  -4  -1  16   72.99    3.60
  -4  -1  16   78.19    3.90
   4  -1 -16   74.49    3.40
   4   1 -16   75.19    4.10
  -4   1  16   71.99    3.60
   4   1 -16   74.79    3.50
  -4   1  16   83.89    4.60
  -3  -1  16   44.00    2.60
  -3  -1  16   44.40    3.10
   3  -1 -16   42.90    2.50
   3  -1 -16   38.10    2.90
   3   1 -16   42.90    3.30
  -3   1  16   45.60    3.00
   3   1 -16   44.40    3.00
  -3   1  16   46.90    3.60
   2  -1 -16  297.77    7.50
  -2  -1  16  279.67    6.40
  -2  -1  16  285.37    7.50
   2  -1 -16  281.67    6.20
  -2   1  16  280.57    7.60
   2   1 -16  285.37    7.40
   2   1 -16  277.37    7.40
  -2   1  16  276.37    7.60
  -1  -1  16   15.10    2.20
   1  -1 -16   20.50    2.20
  -1   1  16   18.50    1.30
   1   1 -16   20.20    2.30
  -1   1  16   20.60    2.50
   1   1 -16   20.50    2.20
  -1   1  16   18.30    2.30
   0  -1 -16  103.79    3.90
   0  -1  16  113.69    4.30
   0  -1  16  104.19    3.90
   0  -1 -16  105.69    4.10
   0   1  16  101.89    4.60
   0   1 -16  104.79    4.40
   0   1  16  105.49    2.80
   0   1 -16  104.39    2.80
  -1  -1 -16   67.69    3.30
   1  -1  16   74.19    3.70
  -1  -1 -16   66.99    3.40
   1  -1  16   61.09    3.10
   1   1  16   73.59    4.10
  -1   1 -16   68.59    2.40
   1   1  16   67.79    2.30
  -1   1 -16   76.29    4.00
   2  -1  16   81.39    3.90
   2  -1  16   76.19    3.70
  -2  -1 -16   79.99    3.60
  -2  -1 -16   75.09    3.70
  -2   1 -16   77.79    2.90
   2   1  16   77.79    2.90
  -2   1 -16   80.79    4.40
   2   1  16   77.99    4.40
  -3  -1 -16   50.19    3.30
   3  -1  16   40.50    3.20
   3  -1  16   48.30    3.10
  -3  -1 -16   38.90    2.90
   3   1  16   49.30    2.70
  -3   1 -16   44.90    2.60
  -3   1 -16   47.10    3.90
   3   1  16   45.50    3.90
   4  -1  16  362.16    9.20
  -4  -1 -16  355.96    9.40
   4  -1  16  357.16    9.60
  -4  -1 -16  352.36    9.10
   4   1  16  360.16   10.50
  -4   1 -16  342.87    8.60
  -4   1 -16  356.26   10.20
   4   1  16  354.06    8.70
  -5  -1 -16    3.90    2.10
   5  -1  16    5.00    2.20
  -5   1 -16    5.50    1.90
  -5   1 -16    8.80    2.60
   5   1  16    5.80    1.80
   5   1  16    5.40    2.40
  -6  -1 -16   33.80    3.60
   6  -1  16   31.60    3.50
  -6   1 -16   32.40    3.30
  -6   1 -16   40.80    4.50
   6   1  16   37.60    3.70
   7  -1  16   29.40    3.80
  -7  -1 -16   30.40    3.80
   7   1  16   27.50    3.50
  -7   1 -16   23.80    3.30
  -8  -1 -16    6.50    2.90
   8  -1  16    5.80    2.80
  -8   1 -16    9.00    3.00
   8   1  16    6.30    2.70
   9   2 -16    9.90    3.70
  -9   2  16   12.50    4.10
   8  -2 -16   43.00    4.20
  -8   2  16   48.60    5.30
   8   2 -16   51.59    5.50
   7  -2 -16    7.90    2.60
  -7  -2  16    9.50    2.50
  -7   2  16   10.80    3.40
   7   2 -16    8.90    2.80
  -6  -2  16   72.39    4.50
   6  -2 -16   69.39    4.50
  -6   2  16   71.59    5.60
   6   2 -16   65.89    5.00
  -5  -2  16   14.80    2.50
   5  -2 -16   19.50    2.70
  -5   2  16   17.90    2.40
   5   2 -16   16.40    2.10
   5   2 -16   22.30    3.20
  -5   2  16   12.60    2.90
   4  -2 -16   79.59    4.10
  -4  -2  16   79.99    4.20
  -4   2  16   89.09    4.90
   4   2 -16   81.89    4.70
  -4   2  16   81.19    3.90
   4   2 -16   80.79    3.80
   3  -2 -16   15.70    2.20
  -3  -2  16   15.40    2.20
  -3   2  16   19.00    2.30
   3   2 -16   17.80    2.60
   3   2 -16   21.10    2.40
  -3   2  16   16.80    2.80
   2  -2 -16   25.80    2.50
  -2  -2  16   28.20    2.80
  -2   2  16   24.10    2.90
   2   2 -16   25.90    2.80
   2   2 -16   24.30    2.60
  -2   2  16   23.90    2.60
  -1  -2  16   88.99    3.90
   1  -2 -16   93.49    3.90
  -1   2  16   92.19    4.50
  -1   2  16   91.69    4.40
   1   2 -16   92.89    4.30
   1   2 -16   89.89    4.40
   0  -2  16  223.58    6.40
   0  -2 -16  220.48    6.20
   0   2 -16  220.88    6.60
   0   2 -16  212.08    6.80
   0   2  16  215.48    7.10
  -1  -2 -16   10.30    2.00
   1  -2  16   10.00    1.80
   1  -2  16    5.40    1.80
  -1  -2 -16    6.70    1.50
  -1   2 -16    9.10    2.30
   1   2  16    8.50    2.40
  -2  -2 -16   62.59    3.30
   2  -2  16   55.99    3.50
  -2  -2 -16   54.59    3.40
   2  -2  16   53.19    3.20
   2   2  16   56.29    4.40
  -2   2 -16   59.89    4.20
  -3  -2 -16  101.19    4.50
   3  -2  16   98.59    4.60
   3  -2  16  102.69    4.30
  -3  -2 -16  100.69    4.30
   3   2  16  106.49    5.70
  -3   2 -16  106.29    5.40
   4  -2  16   69.59    4.10
  -4  -2 -16   67.39    4.10
   4   2  16   64.89    5.00
  -4   2 -16   58.89    4.80
  -5  -2 -16   89.79    4.80
   5  -2  16   86.29    4.50
  -5   2 -16   82.49    5.60
   5   2  16   75.99    5.70
   6  -2  16   48.50    4.30
  -6  -2 -16   42.00    4.10
  -6   2 -16   44.00    4.80
   6   2  16   37.00    4.60
   7  -2  16    1.30    2.20
  -7  -2 -16   -0.80    2.10
  -8  -3  16   14.60    3.20
   8  -3 -16   24.50    3.60
  -8   3  16   22.30    4.50
   8   3 -16   21.30    4.30
   7  -3 -16   47.30    4.50
  -7  -3  16   40.60    4.20
   7   3 -16   32.70    4.50
  -7   3  16   33.70    4.50
   6  -3 -16   61.59    4.60
  -6  -3  16   60.69    4.60
   6   3 -16   62.29    5.50
  -6   3  16   58.99    5.50
   5  -3 -16   45.30    4.00
  -5  -3  16   36.40    3.70
   5   3 -16   37.20    4.20
  -5   3  16   34.60    4.00
   4  -3 -16   10.30    2.40
  -4  -3  16    9.10    2.20
   4   3 -16   11.30    2.00
   4   3 -16   11.10    2.80
  -4   3  16    9.70    2.90
  -4   3  16   14.30    2.30
  -3  -3  16   40.70    3.50
   3  -3 -16   45.80    3.50
   3   3 -16   47.50    3.40
   3   3 -16   50.19    4.30
  -3   3  16   57.29    4.80
  -3   3  16   46.10    3.60
  -2  -3  16   47.00    3.60
   2  -3 -16   36.80    3.10
  -2   3  16   46.90    4.00
  -2   3  16   44.50    3.70
   2   3 -16   51.59    3.50
   2   3 -16   46.80    4.00
   1  -3 -16  184.48    5.80
  -1  -3  16  174.18    5.90
   1   3 -16  176.18    6.50
   1   3 -16  174.68    6.10
  -1   3  16  164.78    6.20
  -1   3  16  174.38    6.70
   0  -3  16   85.19    4.00
   0  -3 -16   85.69    3.70
   0   3  16   80.89    4.70
   0   3 -16   79.19    4.50
   0   3 -16   87.89    4.60
   0   3  16   93.29    5.00
  -1  -3 -16   51.89    3.50
   1  -3  16   48.40    3.70
   1  -3  16   52.19    3.10
  -1  -3 -16   50.69    3.00
  -1   3 -16   55.49    4.40
   1   3  16   46.30    4.20
  -2  -3 -16   17.20    2.60
  -2  -3 -16   15.80    2.00
   2  -3  16   16.70    2.10
   2  -3  16   19.00    2.60
   2   3  16   20.30    3.40
  -2   3 -16   18.00    3.00
   3  -3  16   66.89    4.30
  -3  -3 -16   71.29    4.30
  -3   3 -16   62.49    4.80
   3   3  16   86.59    5.70
   4  -3  16   14.60    2.70
  -4  -3 -16   15.00    2.90
  -4   3 -16   13.60    3.30
   4   3  16    8.70    3.10
   5  -3  16   63.19    4.60
  -5  -3 -16   65.79    4.30
  -5   3 -16   57.69    5.50
   5   3  16   54.59    5.70
  -6  -3 -16   11.10    2.80
   6  -3  16    7.30    2.60
   6   3  16    5.40    3.40
  -6   3 -16    0.80    3.00
   7  -3  16    8.50    2.90
  -7  -3 -16    6.70    2.90
  -7   3 -16   11.60    3.90
   8  -4 -16    7.20    2.90
  -8  -4  16    1.70    2.60
   8   4 -16    2.80    3.70
  -8   4  16    2.80    3.60
   7  -4 -16   14.10    3.10
  -7  -4  16   19.80    3.30
  -7   4  16   26.60    4.80
   7   4 -16   19.10    4.40
  -6  -4  16    7.40    2.80
   6  -4 -16    6.80    2.70
   6   4 -16    8.70    3.40
  -6   4  16    2.50    3.20
   5  -4 -16    3.90    2.50
  -5  -4  16    6.40    2.50
  -5   4  16    9.80    3.50
   5   4 -16    6.50    3.00
   4  -4 -16   12.80    2.60
  -4  -4  16   14.90    2.90
  -4   4  16   17.40    3.40
   4   4 -16   19.00    3.60
   3  -4 -16  200.38    7.00
  -3  -4  16  197.78    7.00
  -3   4  16  207.88    7.10
   3   4 -16  203.68    7.90
  -3   4  16  197.68    7.80
   3   4 -16  200.18    6.70
   2  -4 -16   14.30    2.40
  -2  -4  16   13.00    2.50
   2   4 -16   14.80    2.50
   2   4 -16   11.40    2.60
  -2   4  16    8.50    2.50
  -2   4  16   12.20    3.10
   1  -4 -16   13.90    2.20
  -1  -4  16    9.00    2.20
  -1   4  16   15.30    3.00
   1   4 -16   18.90    3.20
  -1   4  16   15.60    3.10
   1   4 -16   12.00    2.60
   0  -4  16   12.50    2.20
   0  -4 -16   19.60    2.30
   0   4  16   17.90    3.10
   0   4 -16   15.90    2.80
   0   4 -16   17.70    3.00
   0   4  16   12.20    2.80
  -1  -4 -16    5.10    1.60
  -1  -4 -16    3.50    1.90
   1  -4  16    8.80    2.60
   1  -4  16    5.20    1.70
  -1   4 -16    2.60    2.30
   1   4  16    3.10    2.50
   2  -4  16    6.30    2.40
  -2  -4 -16    5.40    2.10
   2  -4  16    7.30    1.70
  -2  -4 -16    8.10    2.00
  -2   4 -16   10.80    3.00
   2   4  16    7.50    3.00
   3  -4  16   88.29    5.20
  -3  -4 -16   92.09    5.20
   3   4  16   90.09    6.40
  -3   4 -16   94.29    6.00
   4  -4  16   -1.30    1.90
  -4  -4 -16    1.30    2.00
   4   4  16    1.10    2.80
  -4   4 -16    9.80    3.50
   5  -4  16    7.90    2.80
  -5  -4 -16    6.40    2.70
   5   4  16    7.70    3.70
  -5   4 -16   15.30    3.70
  -6  -4 -16   -0.10    2.30
   6  -4  16    6.50    2.70
   6   4  16    7.80    3.70
  -6   4 -16    5.90    3.30
  -7  -4 -16   36.60    4.80
   7  -4  16   46.70    5.30
  -7   4 -16   48.90    6.00
  -7  -5  16   33.30    4.60
   7  -5 -16   28.50    4.20
  -7   5  16   23.40    4.80
   7   5 -16   21.30    4.80
   6  -5 -16    0.80    2.40
  -6  -5  16    1.90    2.50
  -6   5  16   -2.00    3.10
   6   5 -16    2.90    3.40
   5  -5 -16    3.40    2.40
  -5  -5  16    4.70    2.60
  -5   5  16    3.10    3.30
   5   5 -16    0.70    3.10
   4  -5 -16    4.30    2.40
  -4  -5  16    7.30    2.80
   4   5 -16    1.80    2.90
  -4   5  16    8.10    3.50
  -3  -5  16   21.20    3.30
   3  -5 -16   24.40    3.20
  -3   5  16   18.90    3.80
   3   5 -16   18.10    3.50
   2  -5 -16   -0.90    1.80
  -2  -5  16    1.70    2.10
   2   5 -16   -1.50    2.20
  -2   5  16   -1.70    1.90
   2   5 -16    1.80    1.90
  -2   5  16    1.60    2.40
   1  -5 -16  102.29    4.80
  -1  -5  16  107.49    5.20
   1   5 -16  101.79    5.70
   1   5 -16  106.19    6.20
  -1   5  16  100.29    6.20
  -1   5  16  106.39    6.10
   0  -5  16    6.70    2.00
   0  -5 -16    3.00    1.60
   0   5 -16    2.30    2.30
   0   5  16    2.10    2.40
   0   5 -16    4.20    2.50
   1  -5  16   49.80    3.60
  -1  -5 -16   44.80    4.10
  -1  -5 -16   56.69    3.30
   1  -5  16   46.60    4.20
  -1   5 -16   49.99    4.80
   1   5  16   57.19    5.60
   2  -5  16    2.00    2.40
  -2  -5 -16    4.50    2.50
  -2   5 -16    9.80    3.20
   2   5  16    6.20    3.10
   3  -5  16   94.09    5.40
  -3  -5 -16  102.69    5.70
  -3   5 -16   90.99    6.50
   3   5  16  110.79    7.50
   4  -5  16    2.80    2.50
  -4  -5 -16    0.60    2.30
   4   5  16    5.30    3.50
  -4   5 -16   -0.20    2.90
  -5  -5 -16   32.20    3.90
   5  -5  16   33.00    4.10
   5   5  16   34.90    5.30
  -5   5 -16   38.70    5.40
   6  -5  16    7.30    2.80
  -6  -5 -16    5.30    2.80
  -6   5 -16    7.20    3.80
   6   5  16    5.60    3.80
  -6  -6  16    7.00    3.10
   6  -6 -16    9.90    2.90
  -6   6  16   10.50    3.60
   6   6 -16    9.90    4.20
  -5  -6  16    7.00    3.00
   5  -6 -16   10.20    3.10
  -5   6  16   10.40    3.90
   5   6 -16    4.50    3.60
   4  -6 -16   42.10    4.30
  -4  -6  16   30.70    3.90
   4   6 -16   32.20    4.70
  -4   6  16   33.90    4.80
   3  -6 -16   63.19    4.80
  -3  -6  16   67.49    5.20
   3   6 -16   50.79    5.40
  -3   6  16   57.59    5.80
  -2  -6  16    6.90    2.70
   2  -6 -16    5.40    2.30
  -2   6  16    8.50    2.80
  -2   6  16    9.60    3.40
   2   6 -16    7.30    3.20
  -1  -6  16   73.09    5.10
   1  -6 -16   82.79    4.70
  -1   6  16   86.39    6.30
   1   6 -16   91.69    5.80
  -1   6  16   85.69    6.20
   1   6 -16   84.99    6.20
   0  -6 -16    5.40    2.40
   0  -6  16    8.10    2.30
   0  -6 -16    5.50    1.90
   0   6 -16   12.60    3.30
   0   6  16    4.50    2.90
   0   6 -16    8.40    3.20
   1  -6  16   21.10    3.40
  -1  -6 -16   27.40    3.80
   1   6  16   25.70    4.50
  -1   6 -16   31.10    4.40
  -2  -6 -16   14.90    3.20
   2  -6  16    9.20    2.60
   2   6  16   10.10    3.70
  -2   6 -16   14.10    3.70
  -3  -6 -16   73.09    5.70
   3  -6  16   68.69    5.60
  -3   6 -16   68.99    6.30
   3   6  16   63.09    6.70
   4  -6  16    4.30    2.90
  -4  -6 -16    7.50    2.80
   4   6  16    5.60    3.60
  -4   6 -16    6.70    3.40
  -5  -6 -16   -4.50    2.20
   5  -6  16    2.20    2.90
  -5   6 -16    4.50    3.90
   5   6  16    2.20    4.00
   5  -7 -16   71.39    6.10
  -5   7  16   52.69    6.10
   5   7 -16   64.59    6.80
  -4  -7  16   28.00    4.30
   4  -7 -16   22.00    3.80
   4   7 -16   27.60    4.90
  -4   7  16   20.10    4.60
   3  -7 -16   34.70    4.10
  -3  -7  16   34.80    4.40
  -3   7  16   44.10    5.60
   3   7 -16   35.10    5.10
   2  -7 -16   73.19    5.00
  -2  -7  16   74.69    5.60
   2   7 -16   79.79    6.70
  -2   7  16   53.19    5.80
  -1  -7  16   14.60    3.10
   1  -7 -16   13.50    2.60
  -1   7  16   18.20    4.00
   1   7 -16   11.40    3.40
  -1   7  16   14.90    3.90
   0  -7 -16   16.30    3.60
   0  -7  16   15.20    3.20
   0   7  16   19.90    4.40
   0   7 -16   13.70    3.50
  -1  -7 -16    3.20    2.70
   1  -7  16    0.20    2.80
  -1   7 -16    3.10    3.10
   1   7  16    0.60    3.20
  -2  -7 -16   16.00    3.70
   2  -7  16    7.40    3.10
  -2   7 -16   16.70    4.00
   2   7  16   10.00    3.90
   3  -7  16   10.20    3.60
  -3  -7 -16   10.30    3.20
   3   7  16   12.70    4.40
  -3   7 -16   10.00    3.90
  -2  -8  16    5.10    3.00
   2  -8 -16    8.60    2.90
  -2   8  16   10.30    3.90
   2   8 -16    3.00    3.70
  -1  -8  16   11.10    3.20
   1   8 -16    9.40    3.80
   0  -8 -16   18.80    4.20
   0  -8  16   26.50    4.50
   0   8  16   31.50    5.10
   1  -8  16    1.40    3.00
  -1  -8 -16   -0.80    2.80
  -1   8 -16   -2.00    2.80
   1   8  16    0.40    3.30
   9   0 -17   22.30    4.10
  -9   0  17   18.00    4.10
  -8   0  17    1.70    2.80
   8   0 -17    1.50    2.60
  -7   0  17    8.90    2.90
   7   0 -17   14.50    3.00
  -6   0  17    4.80    1.80
  -6   0  17    2.60    2.10
   6   0 -17    2.60    2.10
   6   0 -17    3.80    1.70
   5   0 -17  187.08    6.40
  -5   0  17  177.08    6.40
  -5   0  17  186.28    6.00
   5   0 -17  180.88    6.00
  -4   0  17    3.40    1.90
   4   0 -17    4.90    1.60
   4   0 -17    1.80    1.60
  -4   0  17    5.00    1.60
  -3   0  17   21.50    2.40
   3   0 -17   23.70    2.60
  -3   0  17   26.20    2.50
   3   0 -17   25.40    2.40
   2   0 -17   19.00    2.20
   2   0 -17   14.10    1.80
  -2   0  17   12.20    1.90
  -2   0  17   14.20    2.00
   1   0 -17   46.90    3.00
   1   0 -17   40.20    2.40
  -1   0  17   42.60    2.90
  -1   0  17   43.20    2.70
   0   0  17    3.30    1.50
   0   0  17    3.40    1.10
   0   0 -17    5.40    1.70
   0   0 -17    3.30    1.20
   1   0  17   39.80    3.30
   1   0  17   41.60    2.40
  -1   0 -17   44.10    2.40
  -1   0 -17   42.40    3.20
  -2   0 -17    4.30    1.80
   2   0  17    5.10    1.30
   2   0  17    2.30    1.80
  -2   0 -17    5.40    1.40
  -3   0 -17    5.60    1.60
  -3   0 -17    2.80    1.90
   3   0  17    9.20    1.70
   3   0  17    3.10    2.10
   4   0  17   20.70    2.40
  -4   0 -17   28.20    2.80
  -4   0 -17   29.00    3.30
   4   0  17   23.40    3.20
  -5   0 -17  164.38    5.90
   5   0  17  147.99    9.00
  -5   0 -17  170.08    6.70
   5   0  17  168.18    5.90
   6   0  17    3.70    2.20
  -6   0 -17    4.20    2.10
   7   0  17   -0.30    2.00
  -7   0 -17    1.70    2.10
   9   1 -17    4.10    3.00
  -9   1  17   -2.30    3.00
  -8  -1  17    1.10    2.70
   8   1 -17    6.60    3.00
  -8   1  17   -1.60    2.80
   7  -1 -17    6.10    2.10
  -7  -1  17    5.70    2.50
  -7  -1  17    3.40    2.00
  -7   1  17    5.60    2.90
   7   1 -17    8.70    2.70
   6  -1 -17    3.20    1.80
  -6  -1  17   -0.80    1.70
  -6  -1  17    5.10    2.20
   6   1 -17    1.70    1.50
  -6   1  17    0.90    2.30
   6   1 -17   -0.20    2.10
   5  -1 -17   40.20    3.40
  -5  -1  17   42.90    3.60
  -5  -1  17   42.80    3.40
   5   1 -17   46.40    4.00
  -5   1  17   39.00    3.10
   5   1 -17   47.50    3.10
  -5   1  17   38.20    3.90
   4  -1 -17   -1.70    1.40
  -4  -1  17    1.70    1.60
  -4  -1  17    0.70    1.60
  -4   1  17   -1.80    1.80
  -4   1  17    4.50    1.60
   4   1 -17    2.70    1.50
   4   1 -17    2.30    1.80
   3  -1 -17   98.69    4.20
  -3  -1  17   97.09    4.30
  -3  -1  17   96.69    3.70
  -3   1  17  100.59    4.60
   3   1 -17  103.29    4.20
  -3   1  17   98.69    4.30
   3   1 -17  102.99    4.50
  -2  -1  17   33.70    2.20
  -2  -1  17   37.30    3.00
   2  -1 -17   39.00    2.90
   2   1 -17   34.70    2.90
  -2   1  17   38.80    3.10
   2   1 -17   40.10    3.00
  -2   1  17   33.30    2.80
  -1  -1  17  119.89    4.60
   1  -1 -17  106.99    4.20
   1   1 -17  115.89    4.40
  -1   1  17  107.89    4.50
   1   1 -17  106.99    4.40
  -1   1  17  115.49    4.70
   0  -1  17   14.00    2.10
   0  -1 -17   12.50    1.90
   0  -1  17    9.70    1.80
   0  -1 -17   13.70    1.90
   0   1 -17   12.00    2.20
   0   1  17   13.70    2.40
  -1  -1 -17   47.10    2.80
   1  -1  17   47.50    3.30
   1  -1  17   49.00    3.00
  -1  -1 -17   51.49    3.30
  -1   1 -17   39.70    3.30
   1   1  17   43.60    3.40
   1   1  17   44.50    2.00
  -1   1 -17   42.10    2.50
   2  -1  17   39.40    2.80
  -2  -1 -17   35.50    2.70
   2  -1  17   42.30    3.40
  -2  -1 -17   33.50    2.90
   2   1  17   40.30    2.20
  -2   1 -17   45.50    3.70
   2   1  17   29.60    3.20
  -2   1 -17   38.70    2.20
  -3  -1 -17   40.70    3.30
  -3  -1 -17   35.00    2.90
   3  -1  17   43.00    3.40
   3  -1  17   44.60    3.20
  -3   1 -17   34.90    3.60
   3   1  17   36.70    2.50
   3   1  17   36.00    3.70
  -3   1 -17   36.90    2.40
   4  -1  17   24.60    2.70
  -4  -1 -17   27.00    3.10
  -4  -1 -17   38.30    3.30
   4  -1  17   24.50    3.10
   4   1  17   25.50    3.60
  -4   1 -17   35.10    2.80
   4   1  17   33.90    2.80
  -4   1 -17   37.00    3.90
   5  -1  17   21.20    2.90
  -5  -1 -17   26.40    3.10
  -5   1 -17   19.90    2.50
  -5   1 -17   17.90    3.20
   5   1  17   26.70    3.70
   5   1  17   20.80    2.60
  -6  -1 -17   35.00    3.70
   6  -1  17   31.90    3.40
  -6   1 -17   36.10    5.90
   6   1  17   33.70    3.40
  -6   1 -17   32.40    3.70
   7  -1  17   10.10    2.90
  -7  -1 -17    4.80    2.50
   7   1  17    6.40    2.50
   9   2 -17   15.60    3.80
  -9   2  17   20.80    4.60
   8  -2 -17    6.50    2.40
  -8   2  17    2.70    3.20
   8   2 -17    2.60    2.90
   7  -2 -17   30.60    3.50
  -7  -2  17   33.40    3.60
  -7   2  17   28.00    4.20
   7   2 -17   28.40    4.10
   6  -2 -17   17.50    2.80
  -6  -2  17   15.00    2.70
  -6   2  17   11.30    3.20
   6   2 -17    6.10    2.70
  -5  -2  17   59.29    4.10
   5  -2 -17   66.09    4.10
   5   2 -17   58.99    4.70
   5   2 -17   63.09    3.50
  -5   2  17   59.09    4.90
  -5   2  17   59.29    3.50
   4  -2 -17   81.79    4.20
  -4  -2  17   79.89    4.40
  -4   2  17   72.49    3.80
   4   2 -17   74.89    3.80
   4   2 -17   70.59    4.60
  -4   2  17   82.59    5.00
   3  -2 -17   24.30    2.70
  -3  -2  17   29.10    3.00
   3   2 -17   27.30    2.80
  -3   2  17   25.20    2.80
   3   2 -17   22.40    3.00
  -3   2  17   27.70    3.30
  -2  -2  17   41.10    3.30
   2  -2 -17   37.50    3.10
  -2   2  17   30.00    3.30
   2   2 -17   35.10    3.10
   2   2 -17   32.80    3.00
  -2   2  17   42.10    3.40
   1  -2 -17   30.10    2.60
  -1  -2  17   29.50    2.70
   1   2 -17   33.10    3.10
  -1   2  17   33.70    3.40
   1   2 -17   25.90    2.70
  -1   2  17   30.80    3.20
   0  -2 -17   41.00    2.90
   0  -2  17   30.20    2.60
   0   2 -17   34.80    3.20
   0   2 -17   40.60    3.20
   0   2  17   36.30    3.40
   1  -2  17   64.49    3.50
  -1  -2 -17   55.59    3.40
  -1  -2 -17   55.99    3.20
   1  -2  17   56.69    3.50
   1   2  17   60.69    4.40
  -1   2 -17   52.59    4.00
  -2  -2 -17   83.09    4.10
   2  -2  17   96.39    4.30
   2  -2  17   95.59    4.40
  -2  -2 -17   98.49    4.10
  -2   2 -17   88.29    5.00
   2   2  17   90.19    5.30
  -3  -2 -17   16.00    2.30
   3  -2  17   23.30    2.90
  -3  -2 -17   26.30    2.60
   3  -2  17   21.00    2.50
   3   2  17   16.60    3.20
  -3   2 -17   19.50    3.10
   4  -2  17  140.39    5.60
  -4  -2 -17  139.19    5.60
  -4   2 -17  133.49    6.60
   4   2  17  130.39    6.70
   5  -2  17   -1.90    1.80
  -5  -2 -17    2.00    2.10
  -5   2 -17    1.10    2.30
   5   2  17    0.70    2.80
  -6  -2 -17   21.20    3.30
   6  -2  17   18.10    3.10
  -6   2 -17   21.10    3.90
   6   2  17   12.70    3.60
  -7  -2 -17    4.80    2.50
   7  -2  17    4.70    2.40
  -8  -3  17   25.80    3.80
   8  -3 -17   22.60    3.60
   8   3 -17   18.80    4.10
  -8   3  17   20.90    4.50
  -7  -3  17    8.30    2.80
   7  -3 -17    8.70    2.60
  -7   3  17    7.70    3.40
   7   3 -17   12.00    3.50
   6  -3 -17   75.59    4.90
  -6  -3  17   87.39    5.20
   6   3 -17   77.99    5.50
  -6   3  17   88.79    6.20
  -5  -3  17    7.20    2.50
   5  -3 -17    3.00    2.00
   5   3 -17    2.20    2.50
  -5   3  17    3.40    2.80
   4  -3 -17   75.19    4.40
  -4  -3  17   74.09    4.60
  -4   3  17   78.79    4.20
   4   3 -17   78.79    5.10
   4   3 -17   79.99    4.10
  -4   3  17   80.29    5.30
   3  -3 -17   25.00    2.70
  -3  -3  17   31.40    3.10
  -3   3  17   28.40    3.10
   3   3 -17   28.00    2.90
  -3   3  17   30.60    3.70
   3   3 -17   32.80    3.80
   2  -3 -17   54.89    3.60
  -2  -3  17   51.59    3.80
   2   3 -17   47.70    4.00
   2   3 -17   63.09    3.80
  -2   3  17   68.89    4.20
  -2   3  17   57.59    4.50
   1  -3 -17    9.40    2.00
  -1  -3  17    7.90    2.00
  -1   3  17    6.10    2.20
   1   3 -17    8.70    2.20
  -1   3  17    4.10    2.20
   1   3 -17    8.10    2.40
   0  -3  17   98.59    4.30
   0  -3 -17   92.29    4.10
   0   3 -17   90.69    4.70
   0   3  17   96.09    5.20
   0   3 -17   88.19    4.90
  -1  -3 -17   28.20    3.20
   1  -3  17   25.90    2.60
   1  -3  17   22.00    2.80
  -1  -3 -17   23.20    2.30
  -1   3 -17   14.00    2.70
   1   3  17   20.40    3.30
   2  -3  17  140.79    5.00
  -2  -3 -17  149.49    5.00
  -2  -3 -17  142.59    5.70
   2  -3  17  153.38    5.80
   2   3  17  139.89    6.80
  -2   3 -17  145.59    6.50
  -3  -3 -17    5.00    2.20
   3  -3  17    7.30    2.30
   3   3  17    9.10    3.00
  -3   3 -17    7.30    2.70
  -4  -3 -17   98.39    5.30
   4  -3  17   97.89    5.30
   4   3  17   96.39    6.50
  -4   3 -17  110.49    6.50
  -5  -3 -17   11.50    2.70
   5  -3  17   19.50    3.10
   5   3  17   14.40    3.80
  -5   3 -17   11.30    3.30
   6  -3  17   10.20    2.80
  -6  -3 -17    5.60    2.70
   6   3  17    5.00    3.50
  -6   3 -17    2.20    3.20
   7  -3  17   29.50    3.90
  -7  -3 -17   33.60    4.20
  -7   3 -17   34.60    5.00
   8  -4 -17   15.00    3.40
  -8  -4  17   11.40    3.30
   8   4 -17   14.80    4.40
  -8   4  17   14.10    4.30
   7  -4 -17    8.90    2.90
  -7  -4  17    5.20    2.80
   7   4 -17    0.10    3.20
  -7   4  17    5.20    3.60
  -6  -4  17   23.40    3.60
   6  -4 -17   27.90    3.80
  -6   4  17   29.90    4.90
   6   4 -17   25.30    4.20
  -5  -4  17    5.00    2.50
   5  -4 -17    2.40    2.10
  -5   4  17    3.10    3.10
   5   4 -17    6.40    3.00
  -4  -4  17   67.79    4.80
   4  -4 -17   62.59    4.50
  -4   4  17   53.59    5.00
   4   4 -17   69.89    5.60
  -3  -4  17   21.70    3.10
   3  -4 -17   30.40    3.40
   3   4 -17   20.60    3.50
  -3   4  17   17.20    3.20
   3   4 -17   27.80    3.00
  -3   4  17   33.20    3.50
   2  -4 -17  205.18    6.80
  -2  -4  17  208.28    7.20
   2   4 -17  199.58    7.10
  -2   4  17  196.78    7.50
  -2   4  17  195.38    7.90
   2   4 -17  204.98    7.60
  -1  -4  17   19.10    2.70
   1  -4 -17   13.20    2.20
   1   4 -17   21.50    3.10
  -1   4  17   17.70    3.10
  -1   4  17   21.40    3.40
   1   4 -17   22.10    3.10
   0  -4  17    4.70    1.90
   0  -4 -17    6.20    1.70
   0   4  17    3.90    2.40
   0   4 -17    5.20    2.30
   0   4 -17    5.60    2.20
  -1  -4 -17   12.60    1.90
  -1  -4 -17   16.30    2.90
   1  -4  17   12.70    2.50
   1  -4  17   16.00    2.20
  -1   4 -17   14.20    3.00
   1   4  17   15.30    3.30
   2  -4  17   96.39    4.20
   2  -4  17   89.29    5.10
  -2  -4 -17   87.29    4.80
  -2   4 -17   95.49    5.90
   2   4  17   97.49    6.20
  -3  -4 -17    2.00    2.20
   3  -4  17    3.30    2.40
  -3   4 -17    3.90    2.70
   3   4  17    5.70    3.20
   4  -4  17   13.10    3.00
  -4  -4 -17   16.90    3.00
   4   4  17   12.60    3.80
  -4   4 -17   20.40    4.20
  -5  -4 -17    6.70    2.70
   5  -4  17   13.70    3.00
  -5   4 -17   13.10    3.70
   5   4  17   12.20    4.00
   6  -4  17   38.50    4.40
  -6  -4 -17   21.60    3.40
  -6   4 -17   32.20    5.00
   6   4  17   31.90    5.20
   7  -5 -17   -3.90    2.30
  -7  -5  17    3.30    2.80
  -7   5  17    5.10    3.90
   7   5 -17    2.90    3.70
  -6  -5  17   22.20    3.70
   6  -5 -17   21.90    3.70
  -6   5  17   20.30    4.60
   6   5 -17   24.70    4.70
  -5  -5  17    1.40    2.50
   5  -5 -17    2.60    2.30
   5   5 -17    4.40    3.30
  -5   5  17    1.20    3.20
  -4  -5  17   50.19    4.60
   4  -5 -17   57.09    4.70
   4   5 -17   54.59    5.40
  -4   5  17   58.59    5.40
  -3  -5  17    7.10    2.70
   3  -5 -17    4.80    2.30
   3   5 -17    7.00    3.10
  -3   5  17    4.10    3.20
  -2  -5  17   55.29    4.50
   2  -5 -17   49.60    4.00
   2   5 -17   60.39    4.40
   2   5 -17   52.39    5.00
  -2   5  17   52.59    5.00
  -2   5  17   51.69    4.60
  -1  -5  17    6.50    2.30
   1  -5 -17    5.10    1.90
  -1   5  17    4.50    2.60
  -1   5  17    3.20    2.80
   1   5 -17    7.60    2.90
   1   5 -17    7.50    2.40
   0  -5 -17   38.20    3.30
   0  -5  17   37.00    3.50
   0   5 -17   36.70    4.20
   0   5  17   35.80    4.40
   0   5 -17   46.70    4.70
  -1  -5 -17   22.20    3.40
   1  -5  17    8.70    2.80
  -1  -5 -17   16.40    2.30
   1  -5  17    9.90    2.10
  -1   5 -17   14.00    3.20
   1   5  17    9.70    3.30
   2  -5  17   62.79    4.90
  -2  -5 -17   66.29    5.20
   2   5  17   44.40    5.00
  -2   5 -17   64.99    5.90
  -3  -5 -17    3.40    2.20
   3  -5  17    3.40    2.70
  -3   5 -17    6.80    3.20
   3   5  17    2.20    3.50
  -4  -5 -17   34.70    4.10
   4  -5  17   27.50    3.80
  -4   5 -17   26.10    4.50
   4   5  17   22.70    4.70
   5  -5  17   12.00    2.90
  -5  -5 -17   15.20    3.40
   5   5  17   12.20    4.30
  -5   5 -17   17.10    4.30
  -6  -5 -17    9.10    3.30
   6  -5  17    8.10    3.20
  -6   5 -17    4.80    3.90
   6   5  17    9.30    4.10
  -6  -6  17   10.10    3.30
   6  -6 -17    7.60    2.90
  -6   6  17    7.90    4.00
   6   6 -17    4.40    3.90
  -5  -6  17    1.40    2.50
   5  -6 -17    0.40    2.50
  -5   6  17    2.10    3.50
   5   6 -17    2.90    3.60
   4  -6 -17   43.40    4.40
  -4  -6  17   45.00    4.70
  -4   6  17   47.90    5.60
   4   6 -17   50.89    5.90
   3  -6 -17   76.09    5.20
  -3  -6  17   79.99    5.60
   3   6 -17   71.19    6.20
  -3   6  17   74.59    6.70
   2  -6 -17   32.70    3.50
  -2  -6  17   27.70    3.70
   2   6 -17   36.20    5.00
  -2   6  17   34.40    5.00
  -2   6  17   31.60    4.10
  -1  -6  17    8.60    2.70
   1  -6 -17    9.10    2.30
  -1   6  17   15.00    3.50
   1   6 -17    9.50    2.90
   1   6 -17   12.40    3.60
  -1   6  17   12.10    3.40
   0  -6  17   31.60    3.50
   0  -6 -17   31.80    4.20
   0  -6 -17   34.30    3.20
   0   6 -17   43.40    4.90
   0   6  17   34.00    4.60
   0   6 -17   31.80    4.20
  -1  -6 -17   15.70    3.20
   1  -6  17   19.00    3.60
  -1   6 -17   12.60    3.60
   1   6  17   18.20    4.00
   2  -6  17    3.10    2.50
  -2  -6 -17    0.30    2.60
   2   6  17    2.10    3.30
  -2   6 -17    3.30    2.90
   3  -6  17   20.10    3.60
  -3  -6 -17   17.40    3.30
  -3   6 -17   23.40    4.40
   3   6  17   32.70    5.30
   4  -6  17   23.40    3.70
  -4  -6 -17   22.60    3.60
  -4   6 -17   30.50    4.90
   4   6  17   30.30    5.20
  -5  -6 -17    3.00    3.00
   5  -6  17    0.70    2.90
  -5   6 -17    3.00    4.40
   5   6  17    4.00    4.20
   4  -7 -17   62.99    5.70
  -4  -7  17   52.89    5.30
   4   7 -17   53.09    6.20
  -4   7  17   64.79    6.80
  -3  -7  17  119.49    6.70
   3  -7 -17  102.29    6.20
   3   7 -17  106.19    7.50
  -3   7  17  111.39    7.80
   2  -7 -17   27.70    3.60
  -2  -7  17   28.90    3.90
   2   7 -17   31.10    4.90
  -2   7  17   34.50    5.10
   1  -7 -17   -1.00    1.80
  -1  -7  17   -3.00    2.20
  -1   7  17   11.30    3.40
   1   7 -17    4.90    3.30
  -1   7  17   -0.70    3.00
   0  -7 -17   -0.50    2.70
   0   7  17   -2.50    2.80
   0   7 -17    3.20    2.70
  -1  -7 -17   29.40    4.10
   1  -7  17   37.90    4.70
  -1   7 -17   24.80    4.50
   1   7  17   35.70    5.20
   2  -7  17   24.40    3.90
  -2  -7 -17   22.10    3.90
   2   7  17   25.40    4.80
  -2   7 -17   32.80    5.10
  -3  -7 -17   62.69    5.80
   3  -7  17   54.79    5.60
  -3   7 -17   61.29    6.50
   3   7  17   65.19    7.10
  -1  -8  17   98.89    6.40
   1   8 -17  101.09    8.60
   0  -8 -17    0.40    3.30
  -9   0  18   14.10    3.90
   8   0 -18    0.30    2.40
  -8   0  18    2.30    2.80
  -7   0  18   31.10    4.00
   7   0 -18   32.60    3.80
   6   0 -18    8.80    2.10
  -6   0  18    9.60    2.10
  -6   0  18   14.50    2.90
   6   0 -18    8.50    2.40
  -5   0  18   22.60    2.90
   5   0 -18   21.00    2.60
   5   0 -18   14.50    2.50
  -5   0  18   14.40    2.20
  -4   0  18   35.20    3.00
[truncated: 127,662 more chars]
